# Supplementary material for: Comprehensive Transcriptome and Mutational Profiling of Endemic Burkitt Lymphoma Reveals EBV Type–Specific Differences
Source: Oxford University Press journal article supplement (doi:10.1158/1541-7786.mcr-16-0305), 2017-01-30
Supplement: 15417786mcr160305-sup-171632_2_supp_3818723_9jl9p9.xlsx [file 15417786mcr160305-sup-171632_2_supp_3818723_9jl9p9.xlsx]

## Sheet: Definitions
Supplemantary Table S3: Gene Set Enrichment (GSEA) results after incorporating the surrogate variable analysis.
This table includes significant gene set enrichment results after adjusting for unknown variables using surrogate variable analysis (SVA).
Column Definitions:
GS : Gene set name.
SIZE : Number of genes in the set.
SOURCE : Set definition or source.
ES : Enrichment score.
NES : Normalized (multiplicative rescaling) normalized enrichment score.
NOM p-val : Nominal p-value (from the null distribution of the gene set).
FDR q-val : False discovery rate q-values
FWER p-val : Family wise error rate p-values.
Tag %: Percent of gene set before running enrichment peak.
Gene %: Percent of gene list before running enrichment peak.
Signal : Enrichment signal strength.
FDR (median) : FDR q-values from the median of the null distributions.
glob.p.val : P-value using a global statistic (number of sets above the given set’s NES).GS : Gene set name.
Comparison Groups:
Anatomical Tumor Presentation Site: Abdominal vs Jaw
In Hospital Survival Status: Died vs Survived
EBV genome Type: Type 1 vs Type 2
Geographic designation (BL subtype): endemic BL vs sporadic BL
EBV presence in the Tumor: Positive vs Negative
Molecular Signatures Database v5.0
c2_cp_v5	Canonical pathways
c6_all_v5	Oncogenic signatures
h_all_v5	Hallmark gene sets

## Sheet: Tumor_Site
Anatomical Tumor Presentation Site: Abdominal vs Jaw
Gene Set Enrichment Analysis (GSEA) Results (FDR q < 0.25):
DataBaseName	Gene Set	SIZE	SOURCE	ES	NES	NOM p-val	FDR q-val	FWER p-val	Tag %	Gene %	Signal	FDR (median)	glob.p.val
c6_all_v5	KRAS.600_UP.V1_DN	142	http://www.broadinstitute.org/gsea/msigdb/cards/KRAS.600_UP.V1_DN	-0.38741	-1.5065	0.006928	0.43428	0.582	0.359	0.177	0.299	0.2811	0.13
c6_all_v5	KRAS.300_UP.V1_DN	77	http://www.broadinstitute.org/gsea/msigdb/cards/KRAS.300_UP.V1_DN	-0.42474	-1.5394	0.01085	0.45316	0.516	0.39	0.177	0.322	0.29313	0.154
c2_cp_v5	REACTOME_TELOMERE_MAINTENANCE	35	http://www.broadinstitute.org/gsea/msigdb/cards/REACTOME_TELOMERE_MAINTENANCE	0.5618	1.5634	0.1016	0.55251	0.928	0.486	0.274	0.354	0.29905	0.139
c6_all_v5	JAK2_DN.V1_UP	83	http://www.broadinstitute.org/gsea/msigdb/cards/JAK2_DN.V1_UP	-0.37175	-1.4293	0.02083	0.56825	0.772	0.325	0.184	0.267	0.44401	0.166
c2_cp_v5	KEGG_PYRIMIDINE_METABOLISM	88	http://www.broadinstitute.org/gsea/msigdb/cards/KEGG_PYRIMIDINE_METABOLISM	0.39989	1.5656	0.04564	0.57321	0.924	0.341	0.191	0.278	0.30845	0.146
c2_cp_v5	KEGG_GLYCOLYSIS_GLUCONEOGENESIS	45	http://www.broadinstitute.org/gsea/msigdb/cards/KEGG_GLYCOLYSIS_GLUCONEOGENESIS	0.46186	1.5712	0.0334	0.58414	0.919	0.444	0.223	0.346	0.3133	0.148
c6_all_v5	CTIP_DN.V1_DN	85	http://www.broadinstitute.org/gsea/msigdb/cards/CTIP_DN.V1_DN	-0.36172	-1.4459	0.02391	0.59429	0.724	0.341	0.165	0.287	0.44314	0.196
c6_all_v5	E2F3_UP.V1_DN	89	http://www.broadinstitute.org/gsea/msigdb/cards/E2F3_UP.V1_DN	-0.33628	-1.403	0.03011	0.60089	0.816	0.348	0.214	0.275	0.4967	0.183
c2_cp_v5	KEGG_DNA_REPLICATION	36	http://www.broadinstitute.org/gsea/msigdb/cards/KEGG_DNA_REPLICATION	0.58805	1.5747	0.09072	0.6047	0.913	0.611	0.273	0.445	0.31765	0.159
c2_cp_v5	KEGG_SELENOAMINO_ACID_METABOLISM	26	http://www.broadinstitute.org/gsea/msigdb/cards/KEGG_SELENOAMINO_ACID_METABOLISM	0.47376	1.5767	0.01897	0.63287	0.91	0.462	0.22	0.361	0.32881	0.168
c2_cp_v5	REACTOME_HIV_LIFE_CYCLE	107	http://www.broadinstitute.org/gsea/msigdb/cards/REACTOME_HIV_LIFE_CYCLE	0.3837	1.5329	0.08506	0.64401	0.959	0.411	0.331	0.277	0.37364	0.171
c6_all_v5	RAPA_EARLY_UP.V1_UP	118	http://www.broadinstitute.org/gsea/msigdb/cards/RAPA_EARLY_UP.V1_UP	-0.37284	-1.5439	0.006726	0.65377	0.506	0.415	0.242	0.318	0.41091	0.248
c2_cp_v5	KEGG_GLYCINE_SERINE_AND_THREONINE_METABOLISM	25	http://www.broadinstitute.org/gsea/msigdb/cards/KEGG_GLYCINE_SERINE_AND_THREONINE_METABOLISM	0.50432	1.5798	0.007634	0.66134	0.903	0.32	0.09	0.292	0.33994	0.176
h_all_v5	HALLMARK_MYOGENESIS	151	http://www.broadinstitute.org/gsea/msigdb/cards/HALLMARK_MYOGENESIS	-0.36838	-1.4516	0.02055	0.66531	0.579	0.331	0.16	0.281	0.44231	0.268
c2_cp_v5	KEGG_BASE_EXCISION_REPAIR	33	http://www.broadinstitute.org/gsea/msigdb/cards/KEGG_BASE_EXCISION_REPAIR	0.44649	1.4877	0.08	0.68108	0.981	0.303	0.144	0.26	0.42671	0.195
c2_cp_v5	KEGG_FRUCTOSE_AND_MANNOSE_METABOLISM	31	http://www.broadinstitute.org/gsea/msigdb/cards/KEGG_FRUCTOSE_AND_MANNOSE_METABOLISM	0.49771	1.4991	0.04339	0.68887	0.977	0.258	0.0727	0.24	0.42339	0.198
c2_cp_v5	KEGG_VALINE_LEUCINE_AND_ISOLEUCINE_DEGRADATION	42	http://www.broadinstitute.org/gsea/msigdb/cards/KEGG_VALINE_LEUCINE_AND_ISOLEUCINE_DEGRADATION	0.53704	1.5832	0.05747	0.69259	0.897	0.524	0.215	0.413	0.35267	0.184
c2_cp_v5	REACTOME_DNA_REPAIR	101	http://www.broadinstitute.org/gsea/msigdb/cards/REACTOME_DNA_REPAIR	0.3842	1.4775	0.08542	0.69695	0.983	0.505	0.337	0.337	0.44425	0.205
c2_cp_v5	REACTOME_RNA_POL_I_TRANSCRIPTION	30	http://www.broadinstitute.org/gsea/msigdb/cards/REACTOME_RNA_POL_I_TRANSCRIPTION	0.46213	1.4703	0.09651	0.70022	0.986	0.333	0.161	0.28	0.45782	0.206
c2_cp_v5	REACTOME_NEP_NS2_INTERACTS_WITH_THE_CELLULAR_EXPORT_MACHINERY	27	http://www.broadinstitute.org/gsea/msigdb/cards/REACTOME_NEP_NS2_INTERACTS_WITH_THE_CELLULAR_EXPORT_MACHINERY	0.48895	1.5106	0.1212	0.704	0.976	0.296	0.185	0.242	0.42112	0.2
c2_cp_v5	REACTOME_MEIOSIS	48	http://www.broadinstitute.org/gsea/msigdb/cards/REACTOME_MEIOSIS	0.42488	1.4885	0.1098	0.70428	0.98	0.542	0.343	0.357	0.43977	0.204
c2_cp_v5	REACTOME_RNA_POL_I_RNA_POL_III_AND_MITOCHONDRIAL_TRANSCRIPTION	63	http://www.broadinstitute.org/gsea/msigdb/cards/REACTOME_RNA_POL_I_RNA_POL_III_AND_MITOCHONDRIAL_TRANSCRIPTION	0.3714	1.4331	0.1023	0.70798	0.992	0.286	0.175	0.237	0.49603	0.211
c2_cp_v5	REACTOME_TRANSPORT_OF_MATURE_MRNA_DERIVED_FROM_AN_INTRONLESS_TRANSCRIPT	32	http://www.broadinstitute.org/gsea/msigdb/cards/REACTOME_TRANSPORT_OF_MATURE_MRNA_DERIVED_FROM_AN_INTRONLESS_TRANSCRIPT	0.44718	1.5002	0.1322	0.71405	0.977	0.25	0.185	0.204	0.43893	0.212
c2_cp_v5	REACTOME_REGULATION_OF_GLUCOKINASE_BY_GLUCOKINASE_REGULATORY_PROTEIN	25	http://www.broadinstitute.org/gsea/msigdb/cards/REACTOME_REGULATION_OF_GLUCOKINASE_BY_GLUCOKINASE_REGULATORY_PROTEIN	0.52202	1.5893	0.09129	0.71662	0.882	0.32	0.185	0.261	0.34583	0.189
c2_cp_v5	PID_HDAC_CLASSII_PATHWAY	32	http://www.broadinstitute.org/gsea/msigdb/cards/PID_HDAC_CLASSII_PATHWAY	0.38667	1.436	0.07984	0.71804	0.992	0.156	0.086	0.143	0.50648	0.216
c2_cp_v5	REACTOME_GLOBAL_GENOMIC_NER_GG_NER	32	http://www.broadinstitute.org/gsea/msigdb/cards/REACTOME_GLOBAL_GENOMIC_NER_GG_NER	0.53959	1.6003	0.0551	0.71867	0.866	0.688	0.337	0.457	0.33582	0.184
c6_all_v5	BRCA1_DN.V1_DN	90	http://www.broadinstitute.org/gsea/msigdb/cards/BRCA1_DN.V1_DN	-0.3336	-1.3152	0.1009	0.72056	0.928	0.278	0.169	0.232	0.6176	0.253
c6_all_v5	KRAS.LUNG_UP.V1_DN	70	http://www.broadinstitute.org/gsea/msigdb/cards/KRAS.LUNG_UP.V1_DN	-0.35581	-1.3604	0.0474	0.72191	0.867	0.3	0.134	0.261	0.60818	0.266
c2_cp_v5	REACTOME_HIV_INFECTION	183	http://www.broadinstitute.org/gsea/msigdb/cards/REACTOME_HIV_INFECTION	0.36125	1.4234	0.1505	0.72447	0.993	0.437	0.331	0.296	0.51665	0.225
c2_cp_v5	REACTOME_TRANSPORT_OF_RIBONUCLEOPROTEINS_INTO_THE_HOST_NUCLEUS	27	http://www.broadinstitute.org/gsea/msigdb/cards/REACTOME_TRANSPORT_OF_RIBONUCLEOPROTEINS_INTO_THE_HOST_NUCLEUS	0.46152	1.4391	0.15	0.72782	0.992	0.296	0.185	0.242	0.50968	0.218
c6_all_v5	KRAS.600.LUNG.BREAST_UP.V1_DN	159	http://www.broadinstitute.org/gsea/msigdb/cards/KRAS.600.LUNG.BREAST_UP.V1_DN	-0.31641	-1.3253	0.04703	0.73661	0.917	0.277	0.179	0.23	0.63812	0.264
c2_cp_v5	REACTOME_RNA_POL_II_PRE_TRANSCRIPTION_EVENTS	53	http://www.broadinstitute.org/gsea/msigdb/cards/REACTOME_RNA_POL_II_PRE_TRANSCRIPTION_EVENTS	0.42345	1.4423	0.1109	0.73821	0.992	0.509	0.329	0.343	0.50408	0.225
c2_cp_v5	REACTOME_EXTENSION_OF_TELOMERES	27	http://www.broadinstitute.org/gsea/msigdb/cards/REACTOME_EXTENSION_OF_TELOMERES	0.56962	1.454	0.1392	0.73993	0.991	0.519	0.274	0.377	0.50271	0.224
c6_all_v5	BCAT_BILD_ET_AL_UP	36	http://www.broadinstitute.org/gsea/msigdb/cards/BCAT_BILD_ET_AL_UP	-0.39223	-1.3384	0.1044	0.74042	0.896	0.278	0.157	0.235	0.6239	0.276
c2_cp_v5	KEGG_BASAL_TRANSCRIPTION_FACTORS	30	http://www.broadinstitute.org/gsea/msigdb/cards/KEGG_BASAL_TRANSCRIPTION_FACTORS	0.51764	1.8078	0.01033	0.74317	0.37	0.467	0.229	0.36	0	0.166
c2_cp_v5	REACTOME_RNA_POL_II_TRANSCRIPTION	95	http://www.broadinstitute.org/gsea/msigdb/cards/REACTOME_RNA_POL_II_TRANSCRIPTION	0.36508	1.4434	0.1443	0.7584	0.992	0.484	0.356	0.314	0.51959	0.23
c2_cp_v5	REACTOME_DNA_REPLICATION	178	http://www.broadinstitute.org/gsea/msigdb/cards/REACTOME_DNA_REPLICATION	0.41458	1.3368	0.2381	0.77157	0.999	0.562	0.345	0.373	0.62559	0.255
c2_cp_v5	REACTOME_DNA_STRAND_ELONGATION	30	http://www.broadinstitute.org/gsea/msigdb/cards/REACTOME_DNA_STRAND_ELONGATION	0.55473	1.3529	0.2284	0.77658	0.999	0.533	0.249	0.402	0.61909	0.258
c2_cp_v5	REACTOME_LATE_PHASE_OF_HIV_LIFE_CYCLE	94	http://www.broadinstitute.org/gsea/msigdb/cards/REACTOME_LATE_PHASE_OF_HIV_LIFE_CYCLE	0.40589	1.6007	0.06762	0.78156	0.865	0.287	0.196	0.233	0.36518	0.202
c2_cp_v5	REACTOME_PURINE_METABOLISM	26	http://www.broadinstitute.org/gsea/msigdb/cards/REACTOME_PURINE_METABOLISM	0.43458	1.3382	0.1387	0.78192	0.999	0.385	0.235	0.295	0.63175	0.261
c2_cp_v5	REACTOME_MEIOTIC_RECOMBINATION	25	http://www.broadinstitute.org/gsea/msigdb/cards/REACTOME_MEIOTIC_RECOMBINATION	0.45981	1.3415	0.2	0.7857	0.999	0.56	0.248	0.422	0.6312	0.262
c6_all_v5	PRC2_SUZ12_UP.V1_UP	112	http://www.broadinstitute.org/gsea/msigdb/cards/PRC2_SUZ12_UP.V1_UP	-0.23059	-0.97961	0.4709	0.78718	1	0.25	0.209	0.199	0.78892	0.138
c2_cp_v5	BIOCARTA_VEGF_PATHWAY	29	http://www.broadinstitute.org/gsea/msigdb/cards/BIOCARTA_VEGF_PATHWAY	0.38869	1.3585	0.09631	0.78914	0.999	0.31	0.215	0.244	0.62376	0.263
c2_cp_v5	KEGG_METABOLISM_OF_XENOBIOTICS_BY_CYTOCHROME_P450	26	http://www.broadinstitute.org/gsea/msigdb/cards/KEGG_METABOLISM_OF_XENOBIOTICS_BY_CYTOCHROME_P450	0.46132	1.3278	0.1026	0.78953	0.999	0.423	0.236	0.324	0.65032	0.267
c2_cp_v5	REACTOME_MITOTIC_M_M_G1_PHASES	159	http://www.broadinstitute.org/gsea/msigdb/cards/REACTOME_MITOTIC_M_M_G1_PHASES	0.4252	1.3532	0.2368	0.79234	0.999	0.566	0.345	0.375	0.6318	0.267
c2_cp_v5	REACTOME_M_G1_TRANSITION	75	http://www.broadinstitute.org/gsea/msigdb/cards/REACTOME_M_G1_TRANSITION	0.45411	1.3611	0.2309	0.79597	0.999	0.613	0.344	0.405	0.62473	0.264
c6_all_v5	CRX_NRL_DN.V1_DN	90	http://www.broadinstitute.org/gsea/msigdb/cards/CRX_NRL_DN.V1_DN	-0.21626	-0.93242	0.6452	0.79715	1	0.211	0.145	0.182	0.80502	0.1
c2_cp_v5	PID_MYC_ACTIV_PATHWAY	75	http://www.broadinstitute.org/gsea/msigdb/cards/PID_MYC_ACTIV_PATHWAY	0.38147	1.3426	0.1255	0.79776	0.999	0.36	0.283	0.259	0.64189	0.269
c6_all_v5	HOXA9_DN.V1_UP	171	http://www.broadinstitute.org/gsea/msigdb/cards/HOXA9_DN.V1_UP	-0.22149	-0.92281	0.5909	0.79779	1	0.357	0.272	0.263	0.80828	0.086
c6_all_v5	AKT_UP.V1_DN	139	http://www.broadinstitute.org/gsea/msigdb/cards/AKT_UP.V1_DN	-0.21686	-0.91272	0.6688	0.79893	1	0.288	0.205	0.231	0.80761	0.079
c6_all_v5	ESC_J1_UP_EARLY.V1_UP	124	http://www.broadinstitute.org/gsea/msigdb/cards/ESC_J1_UP_EARLY.V1_UP	-0.23736	-0.9797	0.4989	0.79894	1	0.234	0.188	0.192	0.80083	0.153
c2_cp_v5	REACTOME_FORMATION_OF_TRANSCRIPTION_COUPLED_NER_TC_NER_REPAIR_COMPLEX	27	http://www.broadinstitute.org/gsea/msigdb/cards/REACTOME_FORMATION_OF_TRANSCRIPTION_COUPLED_NER_TC_NER_REPAIR_COMPLEX	0.48478	1.3696	0.1826	0.79927	0.999	0.667	0.329	0.448	0.62179	0.269
c6_all_v5	NRL_DN.V1_DN	98	http://www.broadinstitute.org/gsea/msigdb/cards/NRL_DN.V1_DN	-0.21369	-0.97254	0.5113	0.79938	1	0.194	0.149	0.166	0.79555	0.148
c6_all_v5	RAF_UP.V1_UP	160	http://www.broadinstitute.org/gsea/msigdb/cards/RAF_UP.V1_UP	-0.20906	-0.90921	0.7077	0.79941	1	0.262	0.201	0.212	0.80817	0.07
c6_all_v5	BRCA1_DN.V1_UP	57	http://www.broadinstitute.org/gsea/msigdb/cards/BRCA1_DN.V1_UP	-0.26534	-0.92849	0.6089	0.7997	1	0.281	0.199	0.226	0.80997	0.094
c2_cp_v5	PID_BARD1_PATHWAY	29	http://www.broadinstitute.org/gsea/msigdb/cards/PID_BARD1_PATHWAY	0.46185	1.3743	0.1918	0.79997	0.999	0.172	0.0706	0.161	0.62463	0.267
c6_all_v5	TGFB_UP.V1_UP	141	http://www.broadinstitute.org/gsea/msigdb/cards/TGFB_UP.V1_UP	-0.2304	-0.91525	0.6147	0.80028	1	0.284	0.202	0.229	0.80714	0.08
c6_all_v5	MTOR_UP.V1_DN	140	http://www.broadinstitute.org/gsea/msigdb/cards/MTOR_UP.V1_DN	-0.23425	-0.98584	0.5135	0.80131	1	0.25	0.177	0.208	0.79718	0.168
c6_all_v5	MEL18_DN.V1_UP	109	http://www.broadinstitute.org/gsea/msigdb/cards/MEL18_DN.V1_UP	-0.24862	-0.918	0.5911	0.80215	1	0.147	0.0817	0.136	0.80888	0.093
c6_all_v5	KRAS.LUNG_UP.V1_UP	76	http://www.broadinstitute.org/gsea/msigdb/cards/KRAS.LUNG_UP.V1_UP	-0.24893	-0.92414	0.5901	0.80299	1	0.289	0.215	0.229	0.81148	0.094
c6_all_v5	PKCA_DN.V1_UP	102	http://www.broadinstitute.org/gsea/msigdb/cards/PKCA_DN.V1_UP	-0.27616	-1.1362	0.2116	0.803	0.997	0.196	0.131	0.172	0.76728	0.269
c2_cp_v5	REACTOME_CA_DEPENDENT_EVENTS	26	http://www.broadinstitute.org/gsea/msigdb/cards/REACTOME_CA_DEPENDENT_EVENTS	0.34718	1.1406	0.2895	0.80311	1	0.115	0.0229	0.113	0.76432	0.261
c2_cp_v5	REACTOME_SPHINGOLIPID_METABOLISM	53	http://www.broadinstitute.org/gsea/msigdb/cards/REACTOME_SPHINGOLIPID_METABOLISM	0.30913	1.0746	0.3593	0.8032	1	0.302	0.207	0.24	0.78783	0.224
c6_all_v5	LEF1_UP.V1_UP	138	http://www.broadinstitute.org/gsea/msigdb/cards/LEF1_UP.V1_UP	-0.27186	-1.13	0.1797	0.80417	0.998	0.333	0.221	0.263	0.7706	0.265
c2_cp_v5	REACTOME_TRANSPORT_OF_MATURE_TRANSCRIPT_TO_CYTOPLASM	52	http://www.broadinstitute.org/gsea/msigdb/cards/REACTOME_TRANSPORT_OF_MATURE_TRANSCRIPT_TO_CYTOPLASM	0.27941	1.0829	0.3627	0.80466	1	0.173	0.185	0.142	0.7873	0.23
c2_cp_v5	REACTOME_NUCLEAR_RECEPTOR_TRANSCRIPTION_PATHWAY	32	http://www.broadinstitute.org/gsea/msigdb/cards/REACTOME_NUCLEAR_RECEPTOR_TRANSCRIPTION_PATHWAY	0.34787	1.1226	0.3006	0.80488	1	0.25	0.111	0.223	0.7752	0.25
c2_cp_v5	REACTOME_METABOLISM_OF_NON_CODING_RNA	48	http://www.broadinstitute.org/gsea/msigdb/cards/REACTOME_METABOLISM_OF_NON_CODING_RNA	0.45129	1.3779	0.2065	0.80506	0.999	0.333	0.185	0.273	0.61898	0.269
c6_all_v5	PRC2_SUZ12_UP.V1_DN	116	http://www.broadinstitute.org/gsea/msigdb/cards/PRC2_SUZ12_UP.V1_DN	-0.26973	-1.1236	0.232	0.80536	0.999	0.276	0.215	0.218	0.76694	0.264
c2_cp_v5	REACTOME_METABOLISM_OF_AMINO_ACIDS_AND_DERIVATIVES	146	http://www.broadinstitute.org/gsea/msigdb/cards/REACTOME_METABOLISM_OF_AMINO_ACIDS_AND_DERIVATIVES	0.28938	1.0715	0.3469	0.80599	1	0.466	0.345	0.308	0.78986	0.225
c2_cp_v5	KEGG_BUTANOATE_METABOLISM	26	http://www.broadinstitute.org/gsea/msigdb/cards/KEGG_BUTANOATE_METABOLISM	0.47462	1.3879	0.1053	0.80641	0.998	0.538	0.213	0.425	0.61232	0.27
c2_cp_v5	REACTOME_METABOLISM_OF_NUCLEOTIDES	58	http://www.broadinstitute.org/gsea/msigdb/cards/REACTOME_METABOLISM_OF_NUCLEOTIDES	0.37628	1.363	0.1308	0.80675	0.999	0.379	0.235	0.291	0.63221	0.273
c6_all_v5	CYCLIN_D1_UP.V1_DN	137	http://www.broadinstitute.org/gsea/msigdb/cards/CYCLIN_D1_UP.V1_DN	-0.20311	-0.93248	0.5804	0.8072	1	0.277	0.235	0.214	0.8149	0.114
c2_cp_v5	REACTOME_TCA_CYCLE_AND_RESPIRATORY_ELECTRON_TRANSPORT	110	http://www.broadinstitute.org/gsea/msigdb/cards/REACTOME_TCA_CYCLE_AND_RESPIRATORY_ELECTRON_TRANSPORT	0.40498	1.0842	0.4476	0.80737	1	0.464	0.298	0.328	0.78947	0.234
c2_cp_v5	REACTOME_MITOCHONDRIAL_PROTEIN_IMPORT	49	http://www.broadinstitute.org/gsea/msigdb/cards/REACTOME_MITOCHONDRIAL_PROTEIN_IMPORT	0.4187	1.1075	0.4012	0.80742	1	0.51	0.294	0.361	0.78269	0.244
c2_cp_v5	PID_HNF3A_PATHWAY	28	http://www.broadinstitute.org/gsea/msigdb/cards/PID_HNF3A_PATHWAY	0.33299	1.0795	0.3413	0.80766	1	0.214	0.149	0.183	0.79137	0.231
c2_cp_v5	REACTOME_RESPONSE_TO_ELEVATED_PLATELET_CYTOSOLIC_CA2_	72	http://www.broadinstitute.org/gsea/msigdb/cards/REACTOME_RESPONSE_TO_ELEVATED_PLATELET_CYTOSOLIC_CA2_	0.35839	1.0772	0.3745	0.80774	1	0.389	0.237	0.298	0.79359	0.231
c2_cp_v5	REACTOME_NETRIN1_SIGNALING	25	http://www.broadinstitute.org/gsea/msigdb/cards/REACTOME_NETRIN1_SIGNALING	0.36256	1.1049	0.3234	0.8078	1	0.24	0.114	0.213	0.78475	0.239
c2_cp_v5	KEGG_HEMATOPOIETIC_CELL_LINEAGE	65	http://www.broadinstitute.org/gsea/msigdb/cards/KEGG_HEMATOPOIETIC_CELL_LINEAGE	0.34652	1.0747	0.3495	0.80865	1	0.262	0.148	0.224	0.79311	0.23
c2_cp_v5	KEGG_GLUTATHIONE_METABOLISM	39	http://www.broadinstitute.org/gsea/msigdb/cards/KEGG_GLUTATHIONE_METABOLISM	0.34848	1.1411	0.2705	0.80874	1	0.41	0.282	0.295	0.76952	0.264
c6_all_v5	KRAS.BREAST_UP.V1_DN	78	http://www.broadinstitute.org/gsea/msigdb/cards/KRAS.BREAST_UP.V1_DN	-0.29636	-1.1667	0.1752	0.80878	0.995	0.282	0.163	0.238	0.75685	0.279
c6_all_v5	GCNP_SHH_UP_LATE.V1_DN	138	http://www.broadinstitute.org/gsea/msigdb/cards/GCNP_SHH_UP_LATE.V1_DN	-0.22139	-0.94887	0.5605	0.80884	1	0.138	0.102	0.125	0.81336	0.147
c6_all_v5	EGFR_UP.V1_UP	165	http://www.broadinstitute.org/gsea/msigdb/cards/EGFR_UP.V1_UP	-0.23611	-0.98734	0.4834	0.80907	1	0.242	0.177	0.202	0.80614	0.18
c2_cp_v5	REACTOME_SCFSKP2_MEDIATED_DEGRADATION_OF_P27_P21	50	http://www.broadinstitute.org/gsea/msigdb/cards/REACTOME_SCFSKP2_MEDIATED_DEGRADATION_OF_P27_P21	0.39982	1.1236	0.396	0.80928	1	0.62	0.368	0.393	0.7776	0.257
c6_all_v5	BMI1_DN_MEL18_DN.V1_UP	106	http://www.broadinstitute.org/gsea/msigdb/cards/BMI1_DN_MEL18_DN.V1_UP	-0.24339	-0.94504	0.5492	0.81016	1	0.264	0.222	0.207	0.81542	0.136
c6_all_v5	STK33_SKM_UP	220	http://www.broadinstitute.org/gsea/msigdb/cards/STK33_SKM_UP	-0.22433	-0.89563	0.6134	0.81026	1	0.323	0.24	0.249	0.82155	0.066
c6_all_v5	PTEN_DN.V1_DN	93	http://www.broadinstitute.org/gsea/msigdb/cards/PTEN_DN.V1_DN	-0.24791	-0.97991	0.5097	0.81053	1	0.194	0.131	0.169	0.81178	0.173
c2_cp_v5	KEGG_PROTEASOME	43	http://www.broadinstitute.org/gsea/msigdb/cards/KEGG_PROTEASOME	0.43181	1.1107	0.3983	0.81063	1	0.581	0.344	0.383	0.78527	0.251
c2_cp_v5	REACTOME_APC_C_CDH1_MEDIATED_DEGRADATION_OF_CDC20_AND_OTHER_APC_C_CDH1_TARGETED_PROTEINS_IN_LATE_MITOSIS_EARLY_G1	61	http://www.broadinstitute.org/gsea/msigdb/cards/REACTOME_APC_C_CDH1_MEDIATED_DEGRADATION_OF_CDC20_AND_OTHER_APC_C_CDH1_TARGETED_PROTEINS_IN_LATE_MITOSIS_EARLY_G1	0.39719	1.1085	0.4131	0.81103	1	0.607	0.344	0.4	0.78543	0.249
c2_cp_v5	REACTOME_SIGNALING_BY_INSULIN_RECEPTOR	81	http://www.broadinstitute.org/gsea/msigdb/cards/REACTOME_SIGNALING_BY_INSULIN_RECEPTOR	0.24658	1.085	0.3159	0.81113	1	0.333	0.267	0.246	0.79436	0.241
c2_cp_v5	REACTOME_CELL_CYCLE_MITOTIC	295	http://www.broadinstitute.org/gsea/msigdb/cards/REACTOME_CELL_CYCLE_MITOTIC	0.29092	1.0674	0.3913	0.81113	1	0.492	0.345	0.329	0.79857	0.229
c6_all_v5	PKCA_DN.V1_DN	115	http://www.broadinstitute.org/gsea/msigdb/cards/PKCA_DN.V1_DN	-0.27495	-1.1735	0.1561	0.81115	0.994	0.296	0.201	0.238	0.76351	0.289
c6_all_v5	CSR_EARLY_UP.V1_UP	139	http://www.broadinstitute.org/gsea/msigdb/cards/CSR_EARLY_UP.V1_UP	-0.21761	-0.99011	0.4766	0.81171	1	0.129	0.113	0.116	0.80748	0.188
c2_cp_v5	KEGG_TRYPTOPHAN_METABOLISM	29	http://www.broadinstitute.org/gsea/msigdb/cards/KEGG_TRYPTOPHAN_METABOLISM	0.38611	1.1276	0.3134	0.81189	1	0.345	0.152	0.293	0.77468	0.258
c6_all_v5	E2F3_UP.V1_UP	137	http://www.broadinstitute.org/gsea/msigdb/cards/E2F3_UP.V1_UP	-0.24431	-0.94096	0.5434	0.81207	1	0.292	0.213	0.232	0.81884	0.137
c2_cp_v5	REACTOME_METABOLISM_OF_PROTEINS	299	http://www.broadinstitute.org/gsea/msigdb/cards/REACTOME_METABOLISM_OF_PROTEINS	0.30262	1.1147	0.3629	0.81314	1	0.425	0.297	0.306	0.78563	0.259
c6_all_v5	ATF2_S_UP.V1_DN	139	http://www.broadinstitute.org/gsea/msigdb/cards/ATF2_S_UP.V1_DN	-0.2846	-1.116	0.2316	0.81388	0.999	0.345	0.236	0.267	0.78327	0.266
c2_cp_v5	KEGG_PARKINSONS_DISEASE	99	http://www.broadinstitute.org/gsea/msigdb/cards/KEGG_PARKINSONS_DISEASE	0.43192	1.1419	0.3956	0.81401	1	0.505	0.304	0.354	0.77386	0.272
c2_cp_v5	REACTOME_FORMATION_OF_RNA_POL_II_ELONGATION_COMPLEX_	37	http://www.broadinstitute.org/gsea/msigdb/cards/REACTOME_FORMATION_OF_RNA_POL_II_ELONGATION_COMPLEX_	0.37202	1.1244	0.3648	0.81406	1	0.514	0.329	0.346	0.78007	0.262
c6_all_v5	AKT_UP_MTOR_DN.V1_UP	141	http://www.broadinstitute.org/gsea/msigdb/cards/AKT_UP_MTOR_DN.V1_UP	-0.22511	-0.93349	0.5587	0.81422	1	0.277	0.23	0.215	0.82325	0.136
c2_cp_v5	KEGG_AMINOACYL_TRNA_BIOSYNTHESIS	40	http://www.broadinstitute.org/gsea/msigdb/cards/KEGG_AMINOACYL_TRNA_BIOSYNTHESIS	0.4081	1.1293	0.3587	0.81429	1	0.65	0.406	0.387	0.77698	0.266
c2_cp_v5	PID_HIF2PATHWAY	28	http://www.broadinstitute.org/gsea/msigdb/cards/PID_HIF2PATHWAY	0.32289	1.0885	0.3452	0.81441	1	0.214	0.124	0.188	0.79565	0.244
c6_all_v5	MEL18_DN.V1_DN	105	http://www.broadinstitute.org/gsea/msigdb/cards/MEL18_DN.V1_DN	-0.2551	-0.95068	0.5685	0.81442	1	0.286	0.201	0.23	0.817	0.158
c2_cp_v5	KEGG_PURINE_METABOLISM	125	http://www.broadinstitute.org/gsea/msigdb/cards/KEGG_PURINE_METABOLISM	0.24671	1.0862	0.3346	0.81453	1	0.256	0.191	0.209	0.79499	0.244
c2_cp_v5	KEGG_PROPANOATE_METABOLISM	28	http://www.broadinstitute.org/gsea/msigdb/cards/KEGG_PROPANOATE_METABOLISM	0.45831	1.3807	0.1012	0.81493	0.998	0.464	0.213	0.366	0.62778	0.271
c2_cp_v5	REACTOME_CELL_CYCLE	341	http://www.broadinstitute.org/gsea/msigdb/cards/REACTOME_CELL_CYCLE	0.29272	1.1116	0.3729	0.815	1	0.478	0.345	0.321	0.79026	0.258
c6_all_v5	YAP1_DN	26	http://www.broadinstitute.org/gsea/msigdb/cards/YAP1_DN	-0.27939	-0.93666	0.5337	0.81512	1	0.423	0.277	0.306	0.82602	0.137
c2_cp_v5	REACTOME_MRNA_SPLICING_MINOR_PATHWAY	42	http://www.broadinstitute.org/gsea/msigdb/cards/REACTOME_MRNA_SPLICING_MINOR_PATHWAY	0.40488	1.1441	0.3642	0.81536	1	0.476	0.329	0.321	0.77231	0.274
c2_cp_v5	PID_HIF1_TFPATHWAY	54	http://www.broadinstitute.org/gsea/msigdb/cards/PID_HIF1_TFPATHWAY	0.32864	1.1156	0.3024	0.8174	1	0.333	0.265	0.246	0.79054	0.262
c6_all_v5	STK33_NOMO_UP	248	http://www.broadinstitute.org/gsea/msigdb/cards/STK33_NOMO_UP	-0.22549	-0.89615	0.5982	0.81787	1	0.262	0.222	0.208	0.83088	0.074
c2_cp_v5	KEGG_HUNTINGTONS_DISEASE	153	http://www.broadinstitute.org/gsea/msigdb/cards/KEGG_HUNTINGTONS_DISEASE	0.3324	1.0892	0.4008	0.81898	1	0.484	0.32	0.333	0.79855	0.253
c6_all_v5	MEK_UP.V1_UP	162	http://www.broadinstitute.org/gsea/msigdb/cards/MEK_UP.V1_UP	-0.25177	-1.0441	0.3376	0.8191	1	0.259	0.202	0.209	0.80142	0.242
c2_cp_v5	REACTOME_G1_S_TRANSITION	103	http://www.broadinstitute.org/gsea/msigdb/cards/REACTOME_G1_S_TRANSITION	0.42994	1.3899	0.1901	0.8194	0.997	0.612	0.344	0.405	0.6224	0.273
c6_all_v5	ESC_V6.5_UP_EARLY.V1_UP	125	http://www.broadinstitute.org/gsea/msigdb/cards/ESC_V6.5_UP_EARLY.V1_UP	-0.29124	-1.2294	0.1192	0.81942	0.984	0.32	0.232	0.248	0.75535	0.31
c6_all_v5	VEGF_A_UP.V1_UP	146	http://www.broadinstitute.org/gsea/msigdb/cards/VEGF_A_UP.V1_UP	-0.26526	-1.0484	0.3769	0.81943	1	0.301	0.244	0.23	0.80352	0.243
c2_cp_v5	REACTOME_CYCLIN_E_ASSOCIATED_EVENTS_DURING_G1_S_TRANSITION_	59	http://www.broadinstitute.org/gsea/msigdb/cards/REACTOME_CYCLIN_E_ASSOCIATED_EVENTS_DURING_G1_S_TRANSITION_	0.37416	1.1299	0.3836	0.81964	1	0.542	0.344	0.358	0.78267	0.27
c6_all_v5	BMI1_DN_MEL18_DN.V1_DN	102	http://www.broadinstitute.org/gsea/msigdb/cards/BMI1_DN_MEL18_DN.V1_DN	-0.22528	-0.88911	0.7412	0.82072	1	0.451	0.302	0.317	0.83532	0.067
c6_all_v5	ESC_V6.5_UP_LATE.V1_DN	145	http://www.broadinstitute.org/gsea/msigdb/cards/ESC_V6.5_UP_LATE.V1_DN	-0.21191	-0.95224	0.5959	0.82073	1	0.317	0.285	0.229	0.82525	0.17
c2_cp_v5	KEGG_UBIQUITIN_MEDIATED_PROTEOLYSIS	126	http://www.broadinstitute.org/gsea/msigdb/cards/KEGG_UBIQUITIN_MEDIATED_PROTEOLYSIS	0.20435	1.0908	0.3029	0.82094	1	0.452	0.373	0.286	0.79917	0.256
c2_cp_v5	PID_VEGFR1_2_PATHWAY	67	http://www.broadinstitute.org/gsea/msigdb/cards/PID_VEGFR1_2_PATHWAY	0.26737	1.0614	0.375	0.82126	1	0.403	0.306	0.281	0.80501	0.235
c2_cp_v5	KEGG_AMINO_SUGAR_AND_NUCLEOTIDE_SUGAR_METABOLISM	41	http://www.broadinstitute.org/gsea/msigdb/cards/KEGG_AMINO_SUGAR_AND_NUCLEOTIDE_SUGAR_METABOLISM	0.34591	1.0953	0.3465	0.82136	1	0.268	0.169	0.224	0.79867	0.259
c6_all_v5	PRC1_BMI_UP.V1_UP	96	http://www.broadinstitute.org/gsea/msigdb/cards/PRC1_BMI_UP.V1_UP	-0.24387	-1.0178	0.414	0.82145	1	0.177	0.127	0.156	0.80638	0.234
c6_all_v5	MTOR_UP.N4.V1_DN	147	http://www.broadinstitute.org/gsea/msigdb/cards/MTOR_UP.N4.V1_DN	-0.25168	-0.95533	0.5098	0.82278	1	0.279	0.208	0.223	0.82732	0.171
c2_cp_v5	KEGG_NATURAL_KILLER_CELL_MEDIATED_CYTOTOXICITY	104	http://www.broadinstitute.org/gsea/msigdb/cards/KEGG_NATURAL_KILLER_CELL_MEDIATED_CYTOTOXICITY	0.30723	1.1442	0.2874	0.8228	1	0.375	0.268	0.276	0.7796	0.277
c6_all_v5	CAHOY_ASTROCYTIC	62	http://www.broadinstitute.org/gsea/msigdb/cards/CAHOY_ASTROCYTIC	-0.27228	-1.0214	0.4371	0.8228	1	0.21	0.106	0.188	0.80484	0.232
c6_all_v5	PTEN_DN.V2_UP	89	http://www.broadinstitute.org/gsea/msigdb/cards/PTEN_DN.V2_UP	-0.27586	-1.102	0.2599	0.82392	0.999	0.225	0.128	0.197	0.78822	0.275
c2_cp_v5	KEGG_ARGININE_AND_PROLINE_METABOLISM	44	http://www.broadinstitute.org/gsea/msigdb/cards/KEGG_ARGININE_AND_PROLINE_METABOLISM	0.32	1.0579	0.3704	0.8242	1	0.205	0.132	0.178	0.81158	0.24
c2_cp_v5	REACTOME_RNA_POL_III_TRANSCRIPTION	33	http://www.broadinstitute.org/gsea/msigdb/cards/REACTOME_RNA_POL_III_TRANSCRIPTION	0.30982	1.0967	0.3542	0.82441	1	0.182	0.112	0.162	0.80287	0.263
c2_cp_v5	PID_SYNDECAN_4_PATHWAY	29	http://www.broadinstitute.org/gsea/msigdb/cards/PID_SYNDECAN_4_PATHWAY	0.33886	1.0919	0.3008	0.82441	1	0.414	0.237	0.316	0.80315	0.258
c2_cp_v5	REACTOME_ORC1_REMOVAL_FROM_CHROMATIN	62	http://www.broadinstitute.org/gsea/msigdb/cards/REACTOME_ORC1_REMOVAL_FROM_CHROMATIN	0.37179	1.1307	0.3556	0.82454	1	0.645	0.368	0.409	0.7863	0.277
c6_all_v5	NOTCH_DN.V1_UP	112	http://www.broadinstitute.org/gsea/msigdb/cards/NOTCH_DN.V1_UP	-0.22514	-0.89701	0.6785	0.82479	1	0.277	0.216	0.219	0.83742	0.088
c6_all_v5	BCAT.100_UP.V1_UP	32	http://www.broadinstitute.org/gsea/msigdb/cards/BCAT.100_UP.V1_UP	-0.29766	-0.99019	0.4844	0.82505	1	0.281	0.19	0.228	0.82094	0.205
c6_all_v5	ESC_V6.5_UP_EARLY.V1_DN	132	http://www.broadinstitute.org/gsea/msigdb/cards/ESC_V6.5_UP_EARLY.V1_DN	-0.27231	-1.0857	0.2875	0.82715	1	0.205	0.16	0.174	0.79914	0.274
c6_all_v5	KRAS.LUNG.BREAST_UP.V1_DN	78	http://www.broadinstitute.org/gsea/msigdb/cards/KRAS.LUNG.BREAST_UP.V1_DN	-0.28639	-1.1368	0.2117	0.82803	0.997	0.192	0.0978	0.175	0.79374	0.285
c2_cp_v5	REACTOME_CDT1_ASSOCIATION_WITH_THE_CDC6_ORC_ORIGIN_COMPLEX	52	http://www.broadinstitute.org/gsea/msigdb/cards/REACTOME_CDT1_ASSOCIATION_WITH_THE_CDC6_ORC_ORIGIN_COMPLEX	0.40385	1.1451	0.3634	0.82809	1	0.615	0.344	0.405	0.78596	0.286
c6_all_v5	PDGF_UP.V1_DN	72	http://www.broadinstitute.org/gsea/msigdb/cards/PDGF_UP.V1_DN	-0.26805	-1.0287	0.3707	0.82811	1	0.278	0.201	0.223	0.81074	0.241
c6_all_v5	RAF_UP.V1_DN	152	http://www.broadinstitute.org/gsea/msigdb/cards/RAF_UP.V1_DN	-0.24298	-0.96093	0.528	0.82827	1	0.204	0.16	0.173	0.83088	0.185
c6_all_v5	P53_DN.V1_UP	143	http://www.broadinstitute.org/gsea/msigdb/cards/P53_DN.V1_UP	-0.26795	-1.024	0.4193	0.82937	1	0.217	0.139	0.189	0.81152	0.244
c6_all_v5	CRX_NRL_DN.V1_UP	101	http://www.broadinstitute.org/gsea/msigdb/cards/CRX_NRL_DN.V1_UP	-0.23779	-0.95661	0.5572	0.83031	1	0.178	0.127	0.157	0.83811	0.184
c6_all_v5	E2F1_UP.V1_DN	157	http://www.broadinstitute.org/gsea/msigdb/cards/E2F1_UP.V1_DN	-0.22875	-0.99621	0.4583	0.83164	1	0.229	0.192	0.187	0.82336	0.22
c6_all_v5	BCAT.100_UP.V1_DN	25	http://www.broadinstitute.org/gsea/msigdb/cards/BCAT.100_UP.V1_DN	-0.34821	-0.99237	0.4655	0.83164	1	0.28	0.202	0.224	0.82947	0.217
c6_all_v5	CSR_EARLY_UP.V1_DN	128	http://www.broadinstitute.org/gsea/msigdb/cards/CSR_EARLY_UP.V1_DN	-0.29245	-1.1549	0.2406	0.83224	0.996	0.328	0.256	0.246	0.79021	0.306
c6_all_v5	CAMP_UP.V1_DN	176	http://www.broadinstitute.org/gsea/msigdb/cards/CAMP_UP.V1_DN	-0.25099	-1.1058	0.2698	0.8329	0.999	0.227	0.19	0.187	0.80048	0.281
c2_cp_v5	KEGG_PYRUVATE_METABOLISM	31	http://www.broadinstitute.org/gsea/msigdb/cards/KEGG_PYRUVATE_METABOLISM	0.4203	1.3119	0.1385	0.83327	1	0.387	0.213	0.305	0.6992	0.295
c2_cp_v5	BIOCARTA_TNFR1_PATHWAY	29	http://www.broadinstitute.org/gsea/msigdb/cards/BIOCARTA_TNFR1_PATHWAY	0.29303	1.0371	0.3902	0.83328	1	0.207	0.156	0.175	0.82227	0.247
c2_cp_v5	REACTOME_G_ALPHA_S_SIGNALLING_EVENTS	60	http://www.broadinstitute.org/gsea/msigdb/cards/REACTOME_G_ALPHA_S_SIGNALLING_EVENTS	0.32548	1.1461	0.2434	0.83337	1	0.233	0.133	0.203	0.78995	0.29
c6_all_v5	ESC_V6.5_UP_LATE.V1_UP	131	http://www.broadinstitute.org/gsea/msigdb/cards/ESC_V6.5_UP_LATE.V1_UP	-0.30292	-1.1763	0.1604	0.83405	0.994	0.29	0.201	0.234	0.78851	0.309
c6_all_v5	KRAS.AMP.LUNG_UP.V1_UP	59	http://www.broadinstitute.org/gsea/msigdb/cards/KRAS.AMP.LUNG_UP.V1_UP	-0.30456	-1.1415	0.2277	0.83424	0.997	0.271	0.192	0.22	0.79484	0.294
c6_all_v5	PDGF_ERK_DN.V1_DN	126	http://www.broadinstitute.org/gsea/msigdb/cards/PDGF_ERK_DN.V1_DN	-0.19587	-0.88046	0.6392	0.83428	1	0.286	0.281	0.208	0.84779	0.073
c6_all_v5	ATM_DN.V1_DN	75	http://www.broadinstitute.org/gsea/msigdb/cards/ATM_DN.V1_DN	-0.26912	-1.0493	0.3403	0.83441	1	0.227	0.131	0.198	0.81526	0.263
c2_cp_v5	REACTOME_ACTIVATION_OF_THE_PRE_REPLICATIVE_COMPLEX	30	http://www.broadinstitute.org/gsea/msigdb/cards/REACTOME_ACTIVATION_OF_THE_PRE_REPLICATIVE_COMPLEX	0.48775	1.3075	0.2505	0.83472	1	0.533	0.248	0.402	0.7062	0.295
c2_cp_v5	REACTOME_METABOLISM_OF_VITAMINS_AND_COFACTORS	43	http://www.broadinstitute.org/gsea/msigdb/cards/REACTOME_METABOLISM_OF_VITAMINS_AND_COFACTORS	0.33074	1.1481	0.2872	0.8356	1	0.256	0.146	0.219	0.7891	0.291
c2_cp_v5	REACTOME_DAG_AND_IP3_SIGNALING	28	http://www.broadinstitute.org/gsea/msigdb/cards/REACTOME_DAG_AND_IP3_SIGNALING	0.30327	1.0383	0.3989	0.8359	1	0.107	0.0229	0.105	0.82594	0.253
c6_all_v5	PIGF_UP.V1_DN	122	http://www.broadinstitute.org/gsea/msigdb/cards/PIGF_UP.V1_DN	-0.30903	-1.1914	0.1855	0.83681	0.993	0.336	0.241	0.257	0.79132	0.322
c6_all_v5	ATM_DN.V1_UP	78	http://www.broadinstitute.org/gsea/msigdb/cards/ATM_DN.V1_UP	-0.27678	-1.0536	0.3479	0.83687	1	0.244	0.178	0.201	0.81315	0.275
c6_all_v5	LTE2_UP.V1_UP	151	http://www.broadinstitute.org/gsea/msigdb/cards/LTE2_UP.V1_UP	-0.2388	-1.0882	0.2628	0.83813	1	0.278	0.223	0.219	0.80721	0.29
c2_cp_v5	REACTOME_TRANSCRIPTION	143	http://www.broadinstitute.org/gsea/msigdb/cards/REACTOME_TRANSCRIPTION	0.3287	1.3907	0.1524	0.83855	0.997	0.413	0.329	0.28	0.63751	0.281
c2_cp_v5	BIOCARTA_CARM_ER_PATHWAY	33	http://www.broadinstitute.org/gsea/msigdb/cards/BIOCARTA_CARM_ER_PATHWAY	0.2867	1.0394	0.4134	0.83867	1	0.242	0.158	0.205	0.82898	0.261
c6_all_v5	NOTCH_DN.V1_DN	109	http://www.broadinstitute.org/gsea/msigdb/cards/NOTCH_DN.V1_DN	-0.2527	-1.0057	0.4178	0.83922	1	0.22	0.148	0.189	0.82874	0.248
c2_cp_v5	REACTOME_AUTODEGRADATION_OF_CDH1_BY_CDH1_APC_C	53	http://www.broadinstitute.org/gsea/msigdb/cards/REACTOME_AUTODEGRADATION_OF_CDH1_BY_CDH1_APC_C	0.42996	1.1495	0.3926	0.83927	1	0.642	0.344	0.423	0.79394	0.293
c6_all_v5	CRX_DN.V1_DN	95	http://www.broadinstitute.org/gsea/msigdb/cards/CRX_DN.V1_DN	-0.2959	-1.2073	0.1221	0.83991	0.991	0.368	0.269	0.271	0.7855	0.323
c6_all_v5	PRC2_EZH2_UP.V1_DN	133	http://www.broadinstitute.org/gsea/msigdb/cards/PRC2_EZH2_UP.V1_DN	-0.25635	-1.0297	0.386	0.84043	1	0.331	0.225	0.259	0.82267	0.263
c6_all_v5	ESC_J1_UP_LATE.V1_UP	131	http://www.broadinstitute.org/gsea/msigdb/cards/ESC_J1_UP_LATE.V1_UP	-0.26105	-0.99765	0.45	0.84065	1	0.282	0.195	0.23	0.83472	0.241
c2_cp_v5	KEGG_GLYCEROLIPID_METABOLISM	37	http://www.broadinstitute.org/gsea/msigdb/cards/KEGG_GLYCEROLIPID_METABOLISM	0.33823	1.1599	0.2309	0.84096	1	0.27	0.0921	0.246	0.79223	0.299
c6_all_v5	JNK_DN.V1_DN	126	http://www.broadinstitute.org/gsea/msigdb/cards/JNK_DN.V1_DN	-0.29863	-1.2564	0.06792	0.84099	0.974	0.254	0.176	0.211	0.75818	0.327
c2_cp_v5	KEGG_CYTOSOLIC_DNA_SENSING_PATHWAY	41	http://www.broadinstitute.org/gsea/msigdb/cards/KEGG_CYTOSOLIC_DNA_SENSING_PATHWAY	0.38092	1.2899	0.1758	0.84166	1	0.293	0.16	0.247	0.72856	0.298
c2_cp_v5	KEGG_ALZHEIMERS_DISEASE	136	http://www.broadinstitute.org/gsea/msigdb/cards/KEGG_ALZHEIMERS_DISEASE	0.34946	1.1541	0.3683	0.8417	1	0.434	0.282	0.315	0.79639	0.3
c2_cp_v5	REACTOME_REGULATION_OF_INSULIN_SECRETION	60	http://www.broadinstitute.org/gsea/msigdb/cards/REACTOME_REGULATION_OF_INSULIN_SECRETION	0.25894	1.0493	0.375	0.842	1	0.117	0.0543	0.111	0.83079	0.268
c2_cp_v5	BIOCARTA_NO1_PATHWAY	26	http://www.broadinstitute.org/gsea/msigdb/cards/BIOCARTA_NO1_PATHWAY	0.32928	1.0312	0.3889	0.84276	1	0.154	0.03	0.15	0.83316	0.264
c2_cp_v5	REACTOME_MRNA_PROCESSING	151	http://www.broadinstitute.org/gsea/msigdb/cards/REACTOME_MRNA_PROCESSING	0.25032	1.0267	0.4409	0.84293	1	0.364	0.329	0.247	0.83506	0.257
c2_cp_v5	REACTOME_SRP_DEPENDENT_COTRANSLATIONAL_PROTEIN_TARGETING_TO_MEMBRANE	28	http://www.broadinstitute.org/gsea/msigdb/cards/REACTOME_SRP_DEPENDENT_COTRANSLATIONAL_PROTEIN_TARGETING_TO_MEMBRANE	0.42681	1.0397	0.4694	0.84348	1	0.571	0.313	0.394	0.83398	0.268
c6_all_v5	STK33_NOMO_DN	224	http://www.broadinstitute.org/gsea/msigdb/cards/STK33_NOMO_DN	-0.23362	-1.0334	0.3506	0.84349	1	0.299	0.216	0.238	0.82658	0.277
c2_cp_v5	KEGG_SPLICEOSOME	124	http://www.broadinstitute.org/gsea/msigdb/cards/KEGG_SPLICEOSOME	0.27802	1.0286	0.4194	0.84384	1	0.476	0.383	0.297	0.83676	0.261
c6_all_v5	CYCLIN_D1_KE_.V1_DN	114	http://www.broadinstitute.org/gsea/msigdb/cards/CYCLIN_D1_KE_.V1_DN	-0.23625	-1.0082	0.4228	0.84462	1	0.281	0.21	0.224	0.83252	0.253
c2_cp_v5	REACTOME_RESPIRATORY_ELECTRON_TRANSPORT_ATP_SYNTHESIS_BY_CHEMIOSMOTIC_COUPLING_AND_HEAT_PRODUCTION_BY_UNCOUPLING_PROTEINS_	77	http://www.broadinstitute.org/gsea/msigdb/cards/REACTOME_RESPIRATORY_ELECTRON_TRANSPORT_ATP_SYNTHESIS_BY_CHEMIOSMOTIC_COUPLING_AND_HEAT_PRODUCTION_BY_UNCOUPLING_PROTEINS_	0.51141	1.1503	0.4032	0.84492	1	0.584	0.298	0.413	0.79833	0.297
c2_cp_v5	REACTOME_MITOTIC_G1_G1_S_PHASES	125	http://www.broadinstitute.org/gsea/msigdb/cards/REACTOME_MITOTIC_G1_G1_S_PHASES	0.37122	1.2965	0.2311	0.84622	1	0.552	0.327	0.375	0.72341	0.303
c2_cp_v5	REACTOME_DESTABILIZATION_OF_MRNA_BY_AUF1_HNRNP_D0	48	http://www.broadinstitute.org/gsea/msigdb/cards/REACTOME_DESTABILIZATION_OF_MRNA_BY_AUF1_HNRNP_D0	0.37225	1.0429	0.4518	0.84666	1	0.542	0.344	0.357	0.83375	0.276
c2_cp_v5	REACTOME_CDK_MEDIATED_PHOSPHORYLATION_AND_REMOVAL_OF_CDC6	44	http://www.broadinstitute.org/gsea/msigdb/cards/REACTOME_CDK_MEDIATED_PHOSPHORYLATION_AND_REMOVAL_OF_CDC6	0.43658	1.1636	0.3778	0.84681	1	0.591	0.344	0.389	0.79493	0.302
c2_cp_v5	KEGG_NUCLEOTIDE_EXCISION_REPAIR	43	http://www.broadinstitute.org/gsea/msigdb/cards/KEGG_NUCLEOTIDE_EXCISION_REPAIR	0.49932	1.603	0.0503	0.84737	0.864	0.326	0.134	0.283	0.38985	0.225
c6_all_v5	PTEN_DN.V2_DN	101	http://www.broadinstitute.org/gsea/msigdb/cards/PTEN_DN.V2_DN	-0.20159	-0.85099	0.7843	0.84782	1	0.228	0.193	0.185	0.85973	0.057
c2_cp_v5	REACTOME_AUTODEGRADATION_OF_THE_E3_UBIQUITIN_LIGASE_COP1	45	http://www.broadinstitute.org/gsea/msigdb/cards/REACTOME_AUTODEGRADATION_OF_THE_E3_UBIQUITIN_LIGASE_COP1	0.42665	1.166	0.3771	0.84807	1	0.6	0.344	0.395	0.79291	0.306
c2_cp_v5	REACTOME_METABOLISM_OF_RNA	173	http://www.broadinstitute.org/gsea/msigdb/cards/REACTOME_METABOLISM_OF_RNA	0.27558	1.04	0.4257	0.84855	1	0.422	0.346	0.28	0.83892	0.273
c6_all_v5	TGFB_UP.V1_DN	144	http://www.broadinstitute.org/gsea/msigdb/cards/TGFB_UP.V1_DN	-0.23316	-0.99951	0.4449	0.84876	1	0.326	0.264	0.243	0.83859	0.259
c2_cp_v5	REACTOME_TRANSLATION	65	http://www.broadinstitute.org/gsea/msigdb/cards/REACTOME_TRANSLATION	0.38093	1.1603	0.3373	0.84877	1	0.523	0.338	0.348	0.8004	0.304
c2_cp_v5	REACTOME_GLYCOSPHINGOLIPID_METABOLISM	27	http://www.broadinstitute.org/gsea/msigdb/cards/REACTOME_GLYCOSPHINGOLIPID_METABOLISM	0.35791	1.0443	0.3948	0.84919	1	0.333	0.207	0.265	0.83548	0.279
c2_cp_v5	PID_SHP2_PATHWAY	48	http://www.broadinstitute.org/gsea/msigdb/cards/PID_SHP2_PATHWAY	0.28601	1.0221	0.4398	0.84934	1	0.125	0.0506	0.119	0.83938	0.267
c2_cp_v5	REACTOME_CELL_CYCLE_CHECKPOINTS	108	http://www.broadinstitute.org/gsea/msigdb/cards/REACTOME_CELL_CYCLE_CHECKPOINTS	0.35656	1.1543	0.3495	0.84996	1	0.583	0.344	0.386	0.80444	0.307
c6_all_v5	KRAS.PROSTATE_UP.V1_DN	66	http://www.broadinstitute.org/gsea/msigdb/cards/KRAS.PROSTATE_UP.V1_DN	-0.32235	-1.1966	0.1588	0.85032	0.992	0.212	0.0794	0.196	0.80021	0.335
c2_cp_v5	KEGG_ADIPOCYTOKINE_SIGNALING_PATHWAY	54	http://www.broadinstitute.org/gsea/msigdb/cards/KEGG_ADIPOCYTOKINE_SIGNALING_PATHWAY	0.26461	1.0172	0.4162	0.85079	1	0.315	0.25	0.237	0.84018	0.266
c6_all_v5	STK33_DN	225	http://www.broadinstitute.org/gsea/msigdb/cards/STK33_DN	-0.24318	-1.0905	0.2302	0.85095	1	0.267	0.197	0.218	0.81654	0.301
c2_cp_v5	REACTOME_SYNTHESIS_OF_DNA	87	http://www.broadinstitute.org/gsea/msigdb/cards/REACTOME_SYNTHESIS_OF_DNA	0.42899	1.2913	0.2469	0.85122	1	0.609	0.344	0.402	0.73256	0.304
c6_all_v5	DCA_UP.V1_DN	131	http://www.broadinstitute.org/gsea/msigdb/cards/DCA_UP.V1_DN	-0.26841	-1.2434	0.07955	0.85184	0.979	0.344	0.244	0.262	0.77931	0.338
c6_all_v5	JAK2_DN.V1_DN	101	http://www.broadinstitute.org/gsea/msigdb/cards/JAK2_DN.V1_DN	-0.22282	-0.85289	0.6438	0.85226	1	0.327	0.267	0.241	0.86292	0.069
c6_all_v5	CSR_LATE_UP.V1_DN	135	http://www.broadinstitute.org/gsea/msigdb/cards/CSR_LATE_UP.V1_DN	-0.21306	-0.84517	0.7675	0.85227	1	0.193	0.159	0.164	0.8624	0.048
c2_cp_v5	REACTOME_GLUCOSE_METABOLISM	54	http://www.broadinstitute.org/gsea/msigdb/cards/REACTOME_GLUCOSE_METABOLISM	0.2741	1.0186	0.4099	0.8529	1	0.352	0.285	0.253	0.84225	0.271
c6_all_v5	RB_P130_DN.V1_DN	113	http://www.broadinstitute.org/gsea/msigdb/cards/RB_P130_DN.V1_DN	-0.18708	-0.8559	0.7468	0.85297	1	0.354	0.293	0.253	0.86319	0.074
c6_all_v5	ERB2_UP.V1_UP	151	http://www.broadinstitute.org/gsea/msigdb/cards/ERB2_UP.V1_UP	-0.24528	-1.0541	0.319	0.85436	1	0.272	0.201	0.219	0.82987	0.303
c2_cp_v5	REACTOME_GLUCONEOGENESIS	25	http://www.broadinstitute.org/gsea/msigdb/cards/REACTOME_GLUCONEOGENESIS	0.38392	1.1668	0.2636	0.85465	1	0.48	0.273	0.35	0.80134	0.311
c2_cp_v5	REACTOME_INFLUENZA_LIFE_CYCLE	55	http://www.broadinstitute.org/gsea/msigdb/cards/REACTOME_INFLUENZA_LIFE_CYCLE	0.37724	1.298	0.2232	0.8558	1	0.309	0.186	0.253	0.72599	0.308
c6_all_v5	WNT_UP.V1_DN	109	http://www.broadinstitute.org/gsea/msigdb/cards/WNT_UP.V1_DN	-0.26887	-1.0586	0.356	0.85604	1	0.156	0.0815	0.144	0.83878	0.3
c6_all_v5	CAHOY_OLIGODENDROCUTIC	68	http://www.broadinstitute.org/gsea/msigdb/cards/CAHOY_OLIGODENDROCUTIC	-0.21963	-0.8683	0.7143	0.85733	1	0.206	0.186	0.169	0.86923	0.101
c2_cp_v5	REACTOME_FATTY_ACID_TRIACYLGLYCEROL_AND_KETONE_BODY_METABOLISM	149	http://www.broadinstitute.org/gsea/msigdb/cards/REACTOME_FATTY_ACID_TRIACYLGLYCEROL_AND_KETONE_BODY_METABOLISM	0.25499	1.1685	0.1724	0.85848	1	0.389	0.302	0.275	0.80498	0.313
c6_all_v5	MEK_UP.V1_DN	158	http://www.broadinstitute.org/gsea/msigdb/cards/MEK_UP.V1_DN	-0.21392	-0.86432	0.6617	0.85892	1	0.158	0.128	0.14	0.87004	0.098
c6_all_v5	EGFR_UP.V1_DN	156	http://www.broadinstitute.org/gsea/msigdb/cards/EGFR_UP.V1_DN	-0.21294	-0.86087	0.693	0.85892	1	0.154	0.113	0.138	0.87072	0.09
c6_all_v5	RPS14_DN.V1_UP	161	http://www.broadinstitute.org/gsea/msigdb/cards/RPS14_DN.V1_UP	-0.32236	-1.2315	0.1602	0.85937	0.983	0.36	0.229	0.281	0.79515	0.347
c6_all_v5	KRAS.AMP.LUNG_UP.V1_DN	83	http://www.broadinstitute.org/gsea/msigdb/cards/KRAS.AMP.LUNG_UP.V1_DN	-0.29194	-1.1426	0.1914	0.8595	0.997	0.205	0.126	0.18	0.82062	0.327
h_all_v5	HALLMARK_IL6_JAK_STAT3_SIGNALING	81	http://www.broadinstitute.org/gsea/msigdb/cards/HALLMARK_IL6_JAK_STAT3_SIGNALING	0.23423	0.77193	0.7625	0.85967	1	0.247	0.206	0.197	0.87992	0.095
c6_all_v5	CAHOY_ASTROGLIAL	66	http://www.broadinstitute.org/gsea/msigdb/cards/CAHOY_ASTROGLIAL	-0.2331	-0.85684	0.7533	0.85993	1	0.152	0.0921	0.138	0.87143	0.089
c6_all_v5	BMI1_DN.V1_DN	100	http://www.broadinstitute.org/gsea/msigdb/cards/BMI1_DN.V1_DN	-0.29794	-1.2125	0.1392	0.86042	0.99	0.25	0.16	0.211	0.80673	0.348
c2_cp_v5	REACTOME_HOST_INTERACTIONS_OF_HIV_FACTORS	116	http://www.broadinstitute.org/gsea/msigdb/cards/REACTOME_HOST_INTERACTIONS_OF_HIV_FACTORS	0.35563	1.281	0.25	0.86124	1	0.552	0.398	0.335	0.74507	0.309
c2_cp_v5	REACTOME_TRNA_AMINOACYLATION	41	http://www.broadinstitute.org/gsea/msigdb/cards/REACTOME_TRNA_AMINOACYLATION	0.44002	1.1692	0.3399	0.86579	1	0.634	0.406	0.378	0.81373	0.322
c6_all_v5	BMI1_DN.V1_UP	105	http://www.broadinstitute.org/gsea/msigdb/cards/BMI1_DN.V1_UP	-0.27904	-1.0613	0.3554	0.86589	1	0.171	0.0938	0.157	0.84803	0.314
c6_all_v5	CAHOY_NEURONAL	44	http://www.broadinstitute.org/gsea/msigdb/cards/CAHOY_NEURONAL	-0.37661	-1.2627	0.1191	0.86757	0.97	0.318	0.189	0.259	0.78182	0.342
c2_cp_v5	REACTOME_VIF_MEDIATED_DEGRADATION_OF_APOBEC3G	47	http://www.broadinstitute.org/gsea/msigdb/cards/REACTOME_VIF_MEDIATED_DEGRADATION_OF_APOBEC3G	0.45298	1.1715	0.369	0.86804	1	0.638	0.352	0.415	0.81322	0.32
c6_all_v5	STK33_SKM_DN	207	http://www.broadinstitute.org/gsea/msigdb/cards/STK33_SKM_DN	-0.2445	-1.0706	0.283	0.86833	1	0.213	0.143	0.185	0.83996	0.32
c2_cp_v5	KEGG_DRUG_METABOLISM_CYTOCHROME_P450	29	http://www.broadinstitute.org/gsea/msigdb/cards/KEGG_DRUG_METABOLISM_CYTOCHROME_P450	0.43102	1.2111	0.2366	0.87068	1	0.448	0.236	0.343	0.79256	0.319
c6_all_v5	JNK_DN.V1_UP	107	http://www.broadinstitute.org/gsea/msigdb/cards/JNK_DN.V1_UP	-0.29687	-1.1766	0.2188	0.87076	0.994	0.243	0.152	0.208	0.82309	0.343
c2_cp_v5	KEGG_RNA_POLYMERASE	29	http://www.broadinstitute.org/gsea/msigdb/cards/KEGG_RNA_POLYMERASE	0.395	1.1729	0.3016	0.87268	1	0.379	0.186	0.309	0.81893	0.325
c2_cp_v5	REACTOME_RESPIRATORY_ELECTRON_TRANSPORT	63	http://www.broadinstitute.org/gsea/msigdb/cards/REACTOME_RESPIRATORY_ELECTRON_TRANSPORT	0.54671	1.2136	0.3591	0.87331	1	0.587	0.298	0.414	0.79624	0.322
c6_all_v5	ALK_DN.V1_DN	75	http://www.broadinstitute.org/gsea/msigdb/cards/ALK_DN.V1_DN	-0.33886	-1.2729	0.1012	0.87393	0.962	0.213	0.117	0.189	0.78472	0.352
c6_all_v5	KRAS.KIDNEY_UP.V1_UP	83	http://www.broadinstitute.org/gsea/msigdb/cards/KRAS.KIDNEY_UP.V1_UP	-0.28604	-1.0643	0.3538	0.87462	1	0.325	0.221	0.255	0.8475	0.328
c2_cp_v5	REACTOME_REGULATION_OF_APOPTOSIS	52	http://www.broadinstitute.org/gsea/msigdb/cards/REACTOME_REGULATION_OF_APOPTOSIS	0.32616	1.0035	0.4712	0.87488	1	0.558	0.345	0.367	0.8694	0.296
c2_cp_v5	REACTOME_CLEAVAGE_OF_GROWING_TRANSCRIPT_IN_THE_TERMINATION_REGION_	42	http://www.broadinstitute.org/gsea/msigdb/cards/REACTOME_CLEAVAGE_OF_GROWING_TRANSCRIPT_IN_THE_TERMINATION_REGION_	0.27093	1.0013	0.4536	0.87495	1	0.429	0.365	0.273	0.87005	0.294
c2_cp_v5	REACTOME_PHOSPHOLIPASE_C_MEDIATED_CASCADE	35	http://www.broadinstitute.org/gsea/msigdb/cards/REACTOME_PHOSPHOLIPASE_C_MEDIATED_CASCADE	0.29091	1.0055	0.44	0.87535	1	0.229	0.204	0.183	0.87051	0.298
c2_cp_v5	REACTOME_ASSEMBLY_OF_THE_PRE_REPLICATIVE_COMPLEX	60	http://www.broadinstitute.org/gsea/msigdb/cards/REACTOME_ASSEMBLY_OF_THE_PRE_REPLICATIVE_COMPLEX	0.42196	1.2331	0.3024	0.8759	1	0.617	0.344	0.407	0.78211	0.318
c2_cp_v5	PID_FANCONI_PATHWAY	45	http://www.broadinstitute.org/gsea/msigdb/cards/PID_FANCONI_PATHWAY	0.38739	1.175	0.314	0.87633	1	0.2	0.0863	0.183	0.82154	0.328
c2_cp_v5	PID_ATR_PATHWAY	38	http://www.broadinstitute.org/gsea/msigdb/cards/PID_ATR_PATHWAY	0.40772	1.1767	0.3402	0.88054	1	0.553	0.337	0.368	0.82249	0.331
c2_cp_v5	REACTOME_CROSS_PRESENTATION_OF_SOLUBLE_EXOGENOUS_ANTIGENS_ENDOSOMES	45	http://www.broadinstitute.org/gsea/msigdb/cards/REACTOME_CROSS_PRESENTATION_OF_SOLUBLE_EXOGENOUS_ANTIGENS_ENDOSOMES	0.44137	1.2144	0.3233	0.88181	1	0.622	0.344	0.41	0.79995	0.328
c2_cp_v5	REACTOME_MITOTIC_PROMETAPHASE	80	http://www.broadinstitute.org/gsea/msigdb/cards/REACTOME_MITOTIC_PROMETAPHASE	0.39744	1.2206	0.32	0.8836	1	0.525	0.345	0.346	0.80043	0.325
c2_cp_v5	REACTOME_S_PHASE	103	http://www.broadinstitute.org/gsea/msigdb/cards/REACTOME_S_PHASE	0.39577	1.2707	0.2619	0.88517	1	0.573	0.344	0.379	0.77602	0.324
c2_cp_v5	REACTOME_ACTIVATION_OF_ATR_IN_RESPONSE_TO_REPLICATION_STRESS	35	http://www.broadinstitute.org/gsea/msigdb/cards/REACTOME_ACTIVATION_OF_ATR_IN_RESPONSE_TO_REPLICATION_STRESS	0.43328	1.2165	0.3098	0.88599	1	0.486	0.251	0.365	0.80524	0.327
c2_cp_v5	KEGG_FATTY_ACID_METABOLISM	33	http://www.broadinstitute.org/gsea/msigdb/cards/KEGG_FATTY_ACID_METABOLISM	0.38296	1.2371	0.1894	0.88622	1	0.485	0.223	0.378	0.78734	0.326
h_all_v5	HALLMARK_CHOLESTEROL_HOMEOSTASIS	67	http://www.broadinstitute.org/gsea/msigdb/cards/HALLMARK_CHOLESTEROL_HOMEOSTASIS	0.23524	0.77949	0.7563	0.88634	1	0.254	0.206	0.202	0.90909	0.169
c2_cp_v5	REACTOME_SIGNALING_BY_WNT	58	http://www.broadinstitute.org/gsea/msigdb/cards/REACTOME_SIGNALING_BY_WNT	0.40326	1.2335	0.3016	0.88685	1	0.586	0.344	0.386	0.79039	0.326
c2_cp_v5	REACTOME_FORMATION_OF_THE_HIV1_EARLY_ELONGATION_COMPLEX	28	http://www.broadinstitute.org/gsea/msigdb/cards/REACTOME_FORMATION_OF_THE_HIV1_EARLY_ELONGATION_COMPLEX	0.44896	1.2227	0.3053	0.88844	1	0.607	0.329	0.408	0.801	0.33
c2_cp_v5	REACTOME_BIOSYNTHESIS_OF_THE_N_GLYCAN_PRECURSOR_DOLICHOL_LIPID_LINKED_OLIGOSACCHARIDE_LLO_AND_TRANSFER_TO_A_NASCENT_PROTEIN	28	http://www.broadinstitute.org/gsea/msigdb/cards/REACTOME_BIOSYNTHESIS_OF_THE_N_GLYCAN_PRECURSOR_DOLICHOL_LIPID_LINKED_OLIGOSACCHARIDE_LLO_AND_TRANSFER_TO_A_NASCENT_PROTEIN	0.35767	0.99385	0.4919	0.88853	1	0.393	0.234	0.302	0.88358	0.318
c2_cp_v5	REACTOME_SCF_BETA_TRCP_MEDIATED_DEGRADATION_OF_EMI1	46	http://www.broadinstitute.org/gsea/msigdb/cards/REACTOME_SCF_BETA_TRCP_MEDIATED_DEGRADATION_OF_EMI1	0.4805	1.2471	0.3134	0.88895	1	0.652	0.344	0.43	0.78512	0.331
c2_cp_v5	REACTOME_3_UTR_MEDIATED_TRANSLATIONAL_REGULATION	25	http://www.broadinstitute.org/gsea/msigdb/cards/REACTOME_3_UTR_MEDIATED_TRANSLATIONAL_REGULATION	0.43032	1.177	0.3415	0.88971	1	0.52	0.329	0.349	0.82974	0.336
h_all_v5	HALLMARK_UV_RESPONSE_UP	124	http://www.broadinstitute.org/gsea/msigdb/cards/HALLMARK_UV_RESPONSE_UP	-0.26196	-1.09	0.3501	0.88995	0.98	0.298	0.246	0.227	0.8625	0.382
c2_cp_v5	PID_LKB1_PATHWAY	44	http://www.broadinstitute.org/gsea/msigdb/cards/PID_LKB1_PATHWAY	0.25651	0.99064	0.489	0.89164	1	0.205	0.194	0.165	0.88925	0.313
c2_cp_v5	KEGG_HOMOLOGOUS_RECOMBINATION	28	http://www.broadinstitute.org/gsea/msigdb/cards/KEGG_HOMOLOGOUS_RECOMBINATION	0.3727	1.2381	0.219	0.89558	1	0.536	0.332	0.359	0.79797	0.337
c2_cp_v5	KEGG_CYSTEINE_AND_METHIONINE_METABOLISM	29	http://www.broadinstitute.org/gsea/msigdb/cards/KEGG_CYSTEINE_AND_METHIONINE_METABOLISM	0.39791	1.2241	0.2315	0.89605	1	0.414	0.22	0.324	0.80487	0.336
c2_cp_v5	REACTOME_G2_M_CHECKPOINTS	41	http://www.broadinstitute.org/gsea/msigdb/cards/REACTOME_G2_M_CHECKPOINTS	0.42415	1.1873	0.3202	0.89677	1	0.488	0.251	0.367	0.82786	0.343
c2_cp_v5	REACTOME_APC_C_CDC20_MEDIATED_DEGRADATION_OF_MITOTIC_PROTEINS	62	http://www.broadinstitute.org/gsea/msigdb/cards/REACTOME_APC_C_CDC20_MEDIATED_DEGRADATION_OF_MITOTIC_PROTEINS	0.43831	1.1965	0.3649	0.89776	1	0.661	0.344	0.436	0.82834	0.348
c2_cp_v5	REACTOME_REGULATION_OF_ORNITHINE_DECARBOXYLASE_ODC	47	http://www.broadinstitute.org/gsea/msigdb/cards/REACTOME_REGULATION_OF_ORNITHINE_DECARBOXYLASE_ODC	0.43026	1.1776	0.3651	0.89777	1	0.574	0.344	0.378	0.83853	0.346
c6_all_v5	STK33_UP	242	http://www.broadinstitute.org/gsea/msigdb/cards/STK33_UP	-0.21085	-0.81646	0.7571	0.89857	1	0.298	0.24	0.23	0.91162	0.11
c6_all_v5	RAPA_EARLY_UP.V1_DN	140	http://www.broadinstitute.org/gsea/msigdb/cards/RAPA_EARLY_UP.V1_DN	-0.18516	-0.81173	0.841	0.89928	1	0.271	0.238	0.209	0.91234	0.102
c2_cp_v5	REACTOME_NUCLEAR_SIGNALING_BY_ERBB4	26	http://www.broadinstitute.org/gsea/msigdb/cards/REACTOME_NUCLEAR_SIGNALING_BY_ERBB4	0.4083	1.2515	0.182	0.89966	1	0.308	0.188	0.25	0.79372	0.339
c2_cp_v5	KEGG_OXIDATIVE_PHOSPHORYLATION	103	http://www.broadinstitute.org/gsea/msigdb/cards/KEGG_OXIDATIVE_PHOSPHORYLATION	0.46583	1.1993	0.3603	0.89966	1	0.524	0.281	0.38	0.82987	0.347
c2_cp_v5	KEGG_RIG_I_LIKE_RECEPTOR_SIGNALING_PATHWAY	52	http://www.broadinstitute.org/gsea/msigdb/cards/KEGG_RIG_I_LIKE_RECEPTOR_SIGNALING_PATHWAY	0.26257	0.98532	0.4574	0.89973	1	0.135	0.073	0.125	0.89939	0.327
c2_cp_v5	REACTOME_POST_TRANSLATIONAL_PROTEIN_MODIFICATION	140	http://www.broadinstitute.org/gsea/msigdb/cards/REACTOME_POST_TRANSLATIONAL_PROTEIN_MODIFICATION	0.28561	0.98317	0.475	0.89984	1	0.386	0.271	0.284	0.8968	0.327
c2_cp_v5	KEGG_MTOR_SIGNALING_PATHWAY	47	http://www.broadinstitute.org/gsea/msigdb/cards/KEGG_MTOR_SIGNALING_PATHWAY	0.33848	1.1796	0.2351	0.90138	1	0.34	0.252	0.255	0.84196	0.344
c2_cp_v5	REACTOME_E2F_MEDIATED_REGULATION_OF_DNA_REPLICATION	32	http://www.broadinstitute.org/gsea/msigdb/cards/REACTOME_E2F_MEDIATED_REGULATION_OF_DNA_REPLICATION	0.42084	1.2473	0.264	0.90175	1	0.625	0.323	0.424	0.7972	0.339
c6_all_v5	WNT_UP.V1_UP	108	http://www.broadinstitute.org/gsea/msigdb/cards/WNT_UP.V1_UP	-0.18923	-0.80556	0.8851	0.90217	1	0.306	0.267	0.226	0.91195	0.094
c2_cp_v5	REACTOME_MRNA_CAPPING	28	http://www.broadinstitute.org/gsea/msigdb/cards/REACTOME_MRNA_CAPPING	0.44991	1.2582	0.2685	0.90314	1	0.571	0.329	0.384	0.80031	0.335
c2_cp_v5	REACTOME_P53_INDEPENDENT_G1_S_DNA_DAMAGE_CHECKPOINT	46	http://www.broadinstitute.org/gsea/msigdb/cards/REACTOME_P53_INDEPENDENT_G1_S_DNA_DAMAGE_CHECKPOINT	0.4567	1.2543	0.3008	0.9033	1	0.609	0.344	0.401	0.79646	0.339
c2_cp_v5	KEGG_PATHOGENIC_ESCHERICHIA_COLI_INFECTION	49	http://www.broadinstitute.org/gsea/msigdb/cards/KEGG_PATHOGENIC_ESCHERICHIA_COLI_INFECTION	0.31056	1.1915	0.2052	0.90389	1	0.327	0.22	0.256	0.83379	0.348
c2_cp_v5	BIOCARTA_IL1R_PATHWAY	25	http://www.broadinstitute.org/gsea/msigdb/cards/BIOCARTA_IL1R_PATHWAY	0.41431	1.2392	0.2235	0.90469	1	0.28	0.154	0.237	0.80653	0.344
c6_all_v5	PRC1_BMI_UP.V1_DN	116	http://www.broadinstitute.org/gsea/msigdb/cards/PRC1_BMI_UP.V1_DN	-0.19485	-0.81776	0.8617	0.90491	1	0.259	0.218	0.204	0.91812	0.141
c2_cp_v5	REACTOME_PPARA_ACTIVATES_GENE_EXPRESSION	92	http://www.broadinstitute.org/gsea/msigdb/cards/REACTOME_PPARA_ACTIVATES_GENE_EXPRESSION	0.27332	1.1879	0.1714	0.90574	1	0.337	0.245	0.256	0.83649	0.347
h_all_v5	HALLMARK_INFLAMMATORY_RESPONSE	165	http://www.broadinstitute.org/gsea/msigdb/cards/HALLMARK_INFLAMMATORY_RESPONSE	0.22623	0.79054	0.7379	0.90806	1	0.297	0.227	0.233	0.93168	0.267
c2_cp_v5	PID_MYC_PATHWAY	25	http://www.broadinstitute.org/gsea/msigdb/cards/PID_MYC_PATHWAY	0.31388	1.1806	0.2515	0.90861	1	0.2	0.161	0.168	0.84867	0.349
h_all_v5	HALLMARK_BILE_ACID_METABOLISM	83	http://www.broadinstitute.org/gsea/msigdb/cards/HALLMARK_BILE_ACID_METABOLISM	0.27662	1.0203	0.4214	0.91133	0.997	0.205	0.0953	0.186	0.90909	0.401
c2_cp_v5	REACTOME_GLUCOSE_TRANSPORT	32	http://www.broadinstitute.org/gsea/msigdb/cards/REACTOME_GLUCOSE_TRANSPORT	0.49728	1.6071	0.05809	0.91541	0.858	0.312	0.185	0.255	0.41177	0.239
h_all_v5	HALLMARK_PEROXISOME	92	http://www.broadinstitute.org/gsea/msigdb/cards/HALLMARK_PEROXISOME	0.2018	0.83249	0.7853	0.91554	1	0.304	0.231	0.236	0.93041	0.34
c2_cp_v5	REACTOME_METABOLISM_OF_LIPIDS_AND_LIPOPROTEINS	379	http://www.broadinstitute.org/gsea/msigdb/cards/REACTOME_METABOLISM_OF_LIPIDS_AND_LIPOPROTEINS	0.20417	0.97267	0.4828	0.91643	1	0.259	0.214	0.209	0.91357	0.349
c2_cp_v5	REACTOME_REGULATION_OF_MITOTIC_CELL_CYCLE	72	http://www.broadinstitute.org/gsea/msigdb/cards/REACTOME_REGULATION_OF_MITOTIC_CELL_CYCLE	0.43907	1.2583	0.3109	0.9175	1	0.639	0.344	0.422	0.81343	0.348
h_all_v5	HALLMARK_COAGULATION	92	http://www.broadinstitute.org/gsea/msigdb/cards/HALLMARK_COAGULATION	0.21291	0.69725	0.9173	0.91923	1	0.348	0.238	0.267	0.93391	0.168
c2_cp_v5	REACTOME_NUCLEOTIDE_BINDING_DOMAIN_LEUCINE_RICH_REPEAT_CONTAINING_RECEPTOR_NLR_SIGNALING_PATHWAYS	43	http://www.broadinstitute.org/gsea/msigdb/cards/REACTOME_NUCLEOTIDE_BINDING_DOMAIN_LEUCINE_RICH_REPEAT_CONTAINING_RECEPTOR_NLR_SIGNALING_PATHWAYS	0.26476	0.97276	0.4879	0.92172	1	0.14	0.0724	0.13	0.91914	0.358
c2_cp_v5	BIOCARTA_CHREBP2_PATHWAY	33	http://www.broadinstitute.org/gsea/msigdb/cards/BIOCARTA_CHREBP2_PATHWAY	0.26154	0.96739	0.4779	0.92457	1	0.303	0.246	0.229	0.92258	0.363
c2_cp_v5	BIOCARTA_PROTEASOME_PATHWAY	28	http://www.broadinstitute.org/gsea/msigdb/cards/BIOCARTA_PROTEASOME_PATHWAY	0.39381	0.96468	0.5112	0.92629	1	0.643	0.344	0.423	0.92322	0.363
c2_cp_v5	KEGG_CYTOKINE_CYTOKINE_RECEPTOR_INTERACTION	182	http://www.broadinstitute.org/gsea/msigdb/cards/KEGG_CYTOKINE_CYTOKINE_RECEPTOR_INTERACTION	0.25561	0.96229	0.5028	0.92706	1	0.297	0.221	0.234	0.92665	0.366
h_all_v5	HALLMARK_HYPOXIA	160	http://www.broadinstitute.org/gsea/msigdb/cards/HALLMARK_HYPOXIA	0.21549	0.80173	0.765	0.93169	1	0.369	0.304	0.26	0.95	0.377
c6_all_v5	TBK1.DF_UP	248	http://www.broadinstitute.org/gsea/msigdb/cards/TBK1.DF_UP	-0.16787	-0.78253	0.9407	0.93361	1	0.214	0.207	0.173	0.94435	0.172
c2_cp_v5	PID_BMP_PATHWAY	32	http://www.broadinstitute.org/gsea/msigdb/cards/PID_BMP_PATHWAY	0.29792	0.95763	0.5233	0.93379	1	0.156	0.167	0.13	0.93497	0.381
c6_all_v5	PRC2_EDD_UP.V1_UP	168	http://www.broadinstitute.org/gsea/msigdb/cards/PRC2_EDD_UP.V1_UP	-0.16812	-0.76847	0.8975	0.93772	1	0.25	0.245	0.191	0.94896	0.151
c6_all_v5	KRAS.600_UP.V1_UP	146	http://www.broadinstitute.org/gsea/msigdb/cards/KRAS.600_UP.V1_UP	-0.18845	-0.773	0.9664	0.93987	1	0.301	0.252	0.228	0.9522	0.174
h_all_v5	HALLMARK_TGF_BETA_SIGNALING	51	http://www.broadinstitute.org/gsea/msigdb/cards/HALLMARK_TGF_BETA_SIGNALING	-0.26442	-1.0131	0.4376	0.9404	0.995	0.314	0.271	0.23	0.94091	0.436
c2_cp_v5	REACTOME_SEMA4D_IN_SEMAPHORIN_SIGNALING	28	http://www.broadinstitute.org/gsea/msigdb/cards/REACTOME_SEMA4D_IN_SEMAPHORIN_SIGNALING	0.29574	0.95151	0.5255	0.94387	1	0.357	0.25	0.268	0.94715	0.397
h_all_v5	HALLMARK_WNT_BETA_CATENIN_SIGNALING	38	http://www.broadinstitute.org/gsea/msigdb/cards/HALLMARK_WNT_BETA_CATENIN_SIGNALING	0.24908	0.83744	0.7154	0.95456	1	0.263	0.183	0.216	0.97222	0.439
h_all_v5	HALLMARK_KRAS_SIGNALING_DN	108	http://www.broadinstitute.org/gsea/msigdb/cards/HALLMARK_KRAS_SIGNALING_DN	-0.39376	-1.5068	0.008989	0.95797	0.467	0.343	0.183	0.282	0	0.353
c2_cp_v5	REACTOME_SPHINGOLIPID_DE_NOVO_BIOSYNTHESIS	26	http://www.broadinstitute.org/gsea/msigdb/cards/REACTOME_SPHINGOLIPID_DE_NOVO_BIOSYNTHESIS	0.29262	0.94406	0.5329	0.95814	1	0.192	0.0955	0.174	0.96092	0.431
c2_cp_v5	BIOCARTA_FMLP_PATHWAY	31	http://www.broadinstitute.org/gsea/msigdb/cards/BIOCARTA_FMLP_PATHWAY	0.21805	0.79334	0.7796	0.962	1	0.129	0.0683	0.12	0.97501	0.395
c2_cp_v5	KEGG_VASCULAR_SMOOTH_MUSCLE_CONTRACTION	82	http://www.broadinstitute.org/gsea/msigdb/cards/KEGG_VASCULAR_SMOOTH_MUSCLE_CONTRACTION	0.22365	0.86927	0.6797	0.96296	1	0.244	0.199	0.197	0.97082	0.429
c2_cp_v5	REACTOME_GENERIC_TRANSCRIPTION_PATHWAY	306	http://www.broadinstitute.org/gsea/msigdb/cards/REACTOME_GENERIC_TRANSCRIPTION_PATHWAY	0.22203	0.90192	0.5437	0.96302	1	0.239	0.202	0.195	0.96639	0.435
c2_cp_v5	REACTOME_METABOLISM_OF_CARBOHYDRATES	177	http://www.broadinstitute.org/gsea/msigdb/cards/REACTOME_METABOLISM_OF_CARBOHYDRATES	0.20868	0.89772	0.605	0.96331	1	0.209	0.185	0.173	0.96915	0.438
c2_cp_v5	REACTOME_ACTIVATION_OF_NF_KAPPAB_IN_B_CELLS	58	http://www.broadinstitute.org/gsea/msigdb/cards/REACTOME_ACTIVATION_OF_NF_KAPPAB_IN_B_CELLS	0.30004	0.92056	0.5464	0.96336	1	0.552	0.37	0.349	0.96767	0.439
c6_all_v5	PDGF_ERK_DN.V1_UP	106	http://www.broadinstitute.org/gsea/msigdb/cards/PDGF_ERK_DN.V1_UP	-0.15958	-0.73462	0.937	0.96341	1	0.274	0.268	0.202	0.97414	0.245
c2_cp_v5	REACTOME_CLASS_I_MHC_MEDIATED_ANTIGEN_PROCESSING_PRESENTATION	211	http://www.broadinstitute.org/gsea/msigdb/cards/REACTOME_CLASS_I_MHC_MEDIATED_ANTIGEN_PROCESSING_PRESENTATION	0.1696	0.79678	0.737	0.9635	1	0.403	0.344	0.269	0.97538	0.404
c2_cp_v5	REACTOME_SIGNALING_BY_THE_B_CELL_RECEPTOR_BCR	117	http://www.broadinstitute.org/gsea/msigdb/cards/REACTOME_SIGNALING_BY_THE_B_CELL_RECEPTOR_BCR	0.20544	0.90362	0.5833	0.96373	1	0.436	0.351	0.285	0.96709	0.438
c2_cp_v5	REACTOME_PI3K_CASCADE	48	http://www.broadinstitute.org/gsea/msigdb/cards/REACTOME_PI3K_CASCADE	0.2151	0.8155	0.7554	0.96384	1	0.229	0.204	0.183	0.97447	0.417
c2_cp_v5	REACTOME_G1_PHASE	32	http://www.broadinstitute.org/gsea/msigdb/cards/REACTOME_G1_PHASE	0.27319	0.89117	0.5886	0.96414	1	0.5	0.326	0.338	0.97178	0.433
c2_cp_v5	REACTOME_MYD88_MAL_CASCADE_INITIATED_ON_PLASMA_MEMBRANE	77	http://www.broadinstitute.org/gsea/msigdb/cards/REACTOME_MYD88_MAL_CASCADE_INITIATED_ON_PLASMA_MEMBRANE	0.2075	0.86657	0.6942	0.96447	1	0.299	0.266	0.221	0.97308	0.436
h_all_v5	HALLMARK_PI3K_AKT_MTOR_SIGNALING	93	http://www.broadinstitute.org/gsea/msigdb/cards/HALLMARK_PI3K_AKT_MTOR_SIGNALING	-0.13095	-0.56569	0.9878	0.96477	1	0.247	0.267	0.183	0.97619	0.498
c2_cp_v5	REACTOME_RIG_I_MDA5_MEDIATED_INDUCTION_OF_IFN_ALPHA_BETA_PATHWAYS	58	http://www.broadinstitute.org/gsea/msigdb/cards/REACTOME_RIG_I_MDA5_MEDIATED_INDUCTION_OF_IFN_ALPHA_BETA_PATHWAYS	0.20838	0.78077	0.7791	0.96479	1	0.207	0.192	0.168	0.97436	0.404
c2_cp_v5	PID_AURORA_A_PATHWAY	30	http://www.broadinstitute.org/gsea/msigdb/cards/PID_AURORA_A_PATHWAY	0.26949	0.89917	0.5777	0.96481	1	0.3	0.171	0.249	0.97192	0.442
c2_cp_v5	PID_CASPASE_PATHWAY	51	http://www.broadinstitute.org/gsea/msigdb/cards/PID_CASPASE_PATHWAY	0.24826	0.91138	0.6199	0.96488	1	0.216	0.17	0.18	0.96744	0.438
c2_cp_v5	REACTOME_APOPTOSIS	128	http://www.broadinstitute.org/gsea/msigdb/cards/REACTOME_APOPTOSIS	0.17762	0.81905	0.7456	0.9649	1	0.391	0.345	0.259	0.97469	0.427
c2_cp_v5	REACTOME_IL_2_SIGNALING	37	http://www.broadinstitute.org/gsea/msigdb/cards/REACTOME_IL_2_SIGNALING	0.21621	0.7939	0.7909	0.96495	1	0.297	0.266	0.219	0.97846	0.405
c2_cp_v5	REACTOME_METABOLISM_OF_MRNA	128	http://www.broadinstitute.org/gsea/msigdb/cards/REACTOME_METABOLISM_OF_MRNA	0.21411	0.8127	0.6321	0.96529	1	0.398	0.346	0.263	0.97534	0.422
c2_cp_v5	KEGG_VEGF_SIGNALING_PATHWAY	64	http://www.broadinstitute.org/gsea/msigdb/cards/KEGG_VEGF_SIGNALING_PATHWAY	0.20423	0.78491	0.8277	0.9653	1	0.344	0.266	0.254	0.97696	0.402
c2_cp_v5	REACTOME_REGULATION_OF_WATER_BALANCE_BY_RENAL_AQUAPORINS	31	http://www.broadinstitute.org/gsea/msigdb/cards/REACTOME_REGULATION_OF_WATER_BALANCE_BY_RENAL_AQUAPORINS	0.24422	0.79793	0.7722	0.96533	1	0.161	0.127	0.141	0.97564	0.416
c2_cp_v5	PID_ARF6_TRAFFICKING_PATHWAY	42	http://www.broadinstitute.org/gsea/msigdb/cards/PID_ARF6_TRAFFICKING_PATHWAY	0.23505	0.89478	0.619	0.96568	1	0.214	0.142	0.184	0.9708	0.439
c2_cp_v5	REACTOME_SEMAPHORIN_INTERACTIONS	57	http://www.broadinstitute.org/gsea/msigdb/cards/REACTOME_SEMAPHORIN_INTERACTIONS	0.2232	0.87204	0.7156	0.96596	1	0.211	0.165	0.176	0.97499	0.436
c2_cp_v5	REACTOME_TRIF_MEDIATED_TLR3_SIGNALING	69	http://www.broadinstitute.org/gsea/msigdb/cards/REACTOME_TRIF_MEDIATED_TLR3_SIGNALING	0.1938	0.78222	0.8088	0.96622	1	0.319	0.276	0.232	0.97735	0.408
c2_cp_v5	KEGG_FC_GAMMA_R_MEDIATED_PHAGOCYTOSIS	90	http://www.broadinstitute.org/gsea/msigdb/cards/KEGG_FC_GAMMA_R_MEDIATED_PHAGOCYTOSIS	0.20899	0.80375	0.7319	0.96627	1	0.311	0.269	0.229	0.97689	0.418
c2_cp_v5	REACTOME_GLUCAGON_SIGNALING_IN_METABOLIC_REGULATION	26	http://www.broadinstitute.org/gsea/msigdb/cards/REACTOME_GLUCAGON_SIGNALING_IN_METABOLIC_REGULATION	0.25521	0.8163	0.7811	0.96643	1	0.0769	0.0183	0.0757	0.97517	0.427
c2_cp_v5	REACTOME_ANTIVIRAL_MECHANISM_BY_IFN_STIMULATED_GENES	64	http://www.broadinstitute.org/gsea/msigdb/cards/REACTOME_ANTIVIRAL_MECHANISM_BY_IFN_STIMULATED_GENES	0.20455	0.77748	0.7115	0.96686	1	0.188	0.191	0.152	0.9778	0.405
c2_cp_v5	REACTOME_DEADENYLATION_DEPENDENT_MRNA_DECAY	43	http://www.broadinstitute.org/gsea/msigdb/cards/REACTOME_DEADENYLATION_DEPENDENT_MRNA_DECAY	0.25849	0.91694	0.5381	0.9669	1	0.256	0.237	0.196	0.96957	0.445
c2_cp_v5	REACTOME_TRAF6_MEDIATED_INDUCTION_OF_NFKB_AND_MAP_KINASES_UPON_TLR7_8_OR_9_ACTIVATION	70	http://www.broadinstitute.org/gsea/msigdb/cards/REACTOME_TRAF6_MEDIATED_INDUCTION_OF_NFKB_AND_MAP_KINASES_UPON_TLR7_8_OR_9_ACTIVATION	0.17328	0.73001	0.8824	0.9669	1	0.3	0.266	0.222	0.97505	0.372
c2_cp_v5	KEGG_LYSINE_DEGRADATION	42	http://www.broadinstitute.org/gsea/msigdb/cards/KEGG_LYSINE_DEGRADATION	0.26099	0.89202	0.6069	0.96717	1	0.286	0.213	0.226	0.97498	0.445
c2_cp_v5	REACTOME_TRANSCRIPTIONAL_REGULATION_OF_WHITE_ADIPOCYTE_DIFFERENTIATION	66	http://www.broadinstitute.org/gsea/msigdb/cards/REACTOME_TRANSCRIPTIONAL_REGULATION_OF_WHITE_ADIPOCYTE_DIFFERENTIATION	0.20411	0.86947	0.6765	0.96718	1	0.364	0.302	0.255	0.97529	0.44
c2_cp_v5	PID_NFAT_TFPATHWAY	40	http://www.broadinstitute.org/gsea/msigdb/cards/PID_NFAT_TFPATHWAY	0.25962	0.86327	0.7068	0.96723	1	0.2	0.138	0.173	0.97606	0.437
c2_cp_v5	PID_TCR_PATHWAY	62	http://www.broadinstitute.org/gsea/msigdb/cards/PID_TCR_PATHWAY	-0.17688	-0.61954	0.965	0.96754	1	0.29	0.254	0.218	0.97541	0.234
c2_cp_v5	REACTOME_TRIGLYCERIDE_BIOSYNTHESIS	33	http://www.broadinstitute.org/gsea/msigdb/cards/REACTOME_TRIGLYCERIDE_BIOSYNTHESIS	0.2397	0.78574	0.7722	0.96783	1	0.364	0.273	0.265	0.97959	0.412
c2_cp_v5	REACTOME_INSULIN_RECEPTOR_SIGNALLING_CASCADE	63	http://www.broadinstitute.org/gsea/msigdb/cards/REACTOME_INSULIN_RECEPTOR_SIGNALLING_CASCADE	0.22	0.90397	0.5731	0.96796	1	0.302	0.266	0.223	0.97126	0.444
c6_all_v5	PDGF_UP.V1_UP	125	http://www.broadinstitute.org/gsea/msigdb/cards/PDGF_UP.V1_UP	-0.15036	-0.73872	0.9352	0.96818	1	0.248	0.255	0.186	0.97834	0.298
c2_cp_v5	REACTOME_P53_DEPENDENT_G1_DNA_DAMAGE_RESPONSE	51	http://www.broadinstitute.org/gsea/msigdb/cards/REACTOME_P53_DEPENDENT_G1_DNA_DAMAGE_RESPONSE	0.3021	0.92068	0.5482	0.9684	1	0.569	0.368	0.361	0.97263	0.449
c2_cp_v5	REACTOME_L1CAM_INTERACTIONS	63	http://www.broadinstitute.org/gsea/msigdb/cards/REACTOME_L1CAM_INTERACTIONS	0.19035	0.72348	0.8953	0.96849	1	0.333	0.292	0.237	0.97777	0.376
c2_cp_v5	REACTOME_ER_PHAGOSOME_PATHWAY	50	http://www.broadinstitute.org/gsea/msigdb/cards/REACTOME_ER_PHAGOSOME_PATHWAY	0.29893	0.79836	0.6499	0.96853	1	0.56	0.344	0.369	0.97915	0.426
c2_cp_v5	REACTOME_INNATE_IMMUNE_SYSTEM	195	http://www.broadinstitute.org/gsea/msigdb/cards/REACTOME_INNATE_IMMUNE_SYSTEM	0.18348	0.81931	0.8008	0.9686	1	0.282	0.266	0.21	0.97831	0.444
c2_cp_v5	REACTOME_ELONGATION_ARREST_AND_RECOVERY	26	http://www.broadinstitute.org/gsea/msigdb/cards/REACTOME_ELONGATION_ARREST_AND_RECOVERY	0.32084	0.93561	0.527	0.96891	1	0.538	0.352	0.35	0.97241	0.453
c2_cp_v5	PID_ATF2_PATHWAY	50	http://www.broadinstitute.org/gsea/msigdb/cards/PID_ATF2_PATHWAY	0.2283	0.82328	0.7245	0.96907	1	0.06	0.0229	0.0588	0.97829	0.444
c2_cp_v5	PID_VEGFR1_PATHWAY	26	http://www.broadinstitute.org/gsea/msigdb/cards/PID_VEGFR1_PATHWAY	0.25623	0.80861	0.714	0.96924	1	0.269	0.236	0.206	0.97978	0.434
c2_cp_v5	KEGG_ARRHYTHMOGENIC_RIGHT_VENTRICULAR_CARDIOMYOPATHY_ARVC	50	http://www.broadinstitute.org/gsea/msigdb/cards/KEGG_ARRHYTHMOGENIC_RIGHT_VENTRICULAR_CARDIOMYOPATHY_ARVC	0.21551	0.73079	0.9051	0.96935	1	0.4	0.289	0.285	0.97811	0.386
c2_cp_v5	KEGG_APOPTOSIS	77	http://www.broadinstitute.org/gsea/msigdb/cards/KEGG_APOPTOSIS	0.20323	0.82102	0.7846	0.96936	1	0.169	0.16	0.143	0.97899	0.442
c2_cp_v5	REACTOME_PROCESSING_OF_CAPPED_INTRON_CONTAINING_PRE_MRNA	134	http://www.broadinstitute.org/gsea/msigdb/cards/REACTOME_PROCESSING_OF_CAPPED_INTRON_CONTAINING_PRE_MRNA	0.23214	0.91376	0.5336	0.96938	1	0.463	0.398	0.281	0.9728	0.447
c2_cp_v5	KEGG_JAK_STAT_SIGNALING_PATHWAY	98	http://www.broadinstitute.org/gsea/msigdb/cards/KEGG_JAK_STAT_SIGNALING_PATHWAY	0.24654	0.93753	0.5301	0.9695	1	0.224	0.209	0.179	0.97016	0.459
c2_cp_v5	KEGG_CELL_CYCLE	115	http://www.broadinstitute.org/gsea/msigdb/cards/KEGG_CELL_CYCLE	0.24156	0.92251	0.4921	0.96955	1	0.478	0.343	0.317	0.97548	0.45
c2_cp_v5	BIOCARTA_KERATINOCYTE_PATHWAY	44	http://www.broadinstitute.org/gsea/msigdb/cards/BIOCARTA_KERATINOCYTE_PATHWAY	0.20984	0.78693	0.7885	0.96967	1	0.0909	0.0411	0.0875	0.98112	0.424
c2_cp_v5	REACTOME_PERK_REGULATED_GENE_EXPRESSION	25	http://www.broadinstitute.org/gsea/msigdb/cards/REACTOME_PERK_REGULATED_GENE_EXPRESSION	0.29751	0.9115	0.5464	0.9698	1	0.44	0.289	0.313	0.97228	0.448
c2_cp_v5	REACTOME_PLC_BETA_MEDIATED_EVENTS	36	http://www.broadinstitute.org/gsea/msigdb/cards/REACTOME_PLC_BETA_MEDIATED_EVENTS	0.22399	0.80401	0.812	0.96991	1	0.0833	0.0229	0.0816	0.9806	0.431
c2_cp_v5	SIG_REGULATION_OF_THE_ACTIN_CYTOSKELETON_BY_RHO_GTPASES	29	http://www.broadinstitute.org/gsea/msigdb/cards/SIG_REGULATION_OF_THE_ACTIN_CYTOSKELETON_BY_RHO_GTPASES	0.28344	0.87224	0.627	0.97033	1	0.276	0.205	0.22	0.97979	0.447
c2_cp_v5	KEGG_PHOSPHATIDYLINOSITOL_SIGNALING_SYSTEM	65	http://www.broadinstitute.org/gsea/msigdb/cards/KEGG_PHOSPHATIDYLINOSITOL_SIGNALING_SYSTEM	-0.16702	-0.61999	0.9794	0.97047	1	0.154	0.131	0.134	0.97848	0.27
c2_cp_v5	REACTOME_DOWNSTREAM_SIGNALING_EVENTS_OF_B_CELL_RECEPTOR_BCR	88	http://www.broadinstitute.org/gsea/msigdb/cards/REACTOME_DOWNSTREAM_SIGNALING_EVENTS_OF_B_CELL_RECEPTOR_BCR	0.20827	0.82668	0.6358	0.97055	1	0.477	0.37	0.303	0.9805	0.446
c2_cp_v5	KEGG_NEUROTROPHIN_SIGNALING_PATHWAY	112	http://www.broadinstitute.org/gsea/msigdb/cards/KEGG_NEUROTROPHIN_SIGNALING_PATHWAY	0.17492	0.72464	0.8625	0.97058	1	0.268	0.266	0.198	0.9796	0.394
c2_cp_v5	REACTOME_ANTIGEN_PROCESSING_UBIQUITINATION_PROTEASOME_DEGRADATION	181	http://www.broadinstitute.org/gsea/msigdb/cards/REACTOME_ANTIGEN_PROCESSING_UBIQUITINATION_PROTEASOME_DEGRADATION	0.18977	0.90486	0.5708	0.97082	1	0.398	0.344	0.265	0.97343	0.451
c6_all_v5	GLI1_UP.V1_UP	25	http://www.broadinstitute.org/gsea/msigdb/cards/GLI1_UP.V1_UP	-0.18564	-0.69762	0.9515	0.97085	1	0.44	0.336	0.292	0.97979	0.182
c2_cp_v5	PID_HDAC_CLASSI_PATHWAY	62	http://www.broadinstitute.org/gsea/msigdb/cards/PID_HDAC_CLASSI_PATHWAY	0.17662	0.79924	0.7968	0.97089	1	0.145	0.158	0.123	0.98269	0.436
c2_cp_v5	PID_NEPHRIN_NEPH1_PATHWAY	29	http://www.broadinstitute.org/gsea/msigdb/cards/PID_NEPHRIN_NEPH1_PATHWAY	0.19604	0.68128	0.924	0.97099	1	0.379	0.317	0.26	0.98038	0.342
c2_cp_v5	KEGG_ALDOSTERONE_REGULATED_SODIUM_REABSORPTION	35	http://www.broadinstitute.org/gsea/msigdb/cards/KEGG_ALDOSTERONE_REGULATED_SODIUM_REABSORPTION	0.20994	0.71614	0.9246	0.97104	1	0.2	0.16	0.169	0.97995	0.384
c2_cp_v5	PID_P38_ALPHA_BETA_PATHWAY	29	http://www.broadinstitute.org/gsea/msigdb/cards/PID_P38_ALPHA_BETA_PATHWAY	0.28176	0.90681	0.5741	0.97105	1	0.172	0.0744	0.16	0.97528	0.452
c2_cp_v5	BIOCARTA_HIVNEF_PATHWAY	57	http://www.broadinstitute.org/gsea/msigdb/cards/BIOCARTA_HIVNEF_PATHWAY	0.18363	0.71862	0.8857	0.97139	1	0.263	0.266	0.194	0.98023	0.397
c2_cp_v5	KEGG_NOTCH_SIGNALING_PATHWAY	42	http://www.broadinstitute.org/gsea/msigdb/cards/KEGG_NOTCH_SIGNALING_PATHWAY	0.19506	0.73153	0.8885	0.97193	1	0.19	0.155	0.161	0.98145	0.402
c2_cp_v5	REACTOME_PROTEIN_FOLDING	48	http://www.broadinstitute.org/gsea/msigdb/cards/REACTOME_PROTEIN_FOLDING	0.22002	0.77235	0.7251	0.97203	1	0.396	0.288	0.283	0.98186	0.432
c2_cp_v5	KEGG_SNARE_INTERACTIONS_IN_VESICULAR_TRANSPORT	35	http://www.broadinstitute.org/gsea/msigdb/cards/KEGG_SNARE_INTERACTIONS_IN_VESICULAR_TRANSPORT	0.26716	0.9237	0.5545	0.97206	1	0.171	0.0764	0.159	0.9749	0.452
c2_cp_v5	KEGG_PEROXISOME	65	http://www.broadinstitute.org/gsea/msigdb/cards/KEGG_PEROXISOME	0.22655	0.80491	0.75	0.97213	1	0.185	0.103	0.166	0.98233	0.44
c2_cp_v5	REACTOME_NONSENSE_MEDIATED_DECAY_ENHANCED_BY_THE_EXON_JUNCTION_COMPLEX	26	http://www.broadinstitute.org/gsea/msigdb/cards/REACTOME_NONSENSE_MEDIATED_DECAY_ENHANCED_BY_THE_EXON_JUNCTION_COMPLEX	-0.15938	-0.60265	0.9286	0.97217	1	0.462	0.377	0.288	0.98033	0.258
c2_cp_v5	KEGG_LYSOSOME	107	http://www.broadinstitute.org/gsea/msigdb/cards/KEGG_LYSOSOME	0.21187	0.70971	0.7879	0.9722	1	0.262	0.236	0.202	0.98182	0.388
c2_cp_v5	REACTOME_COSTIMULATION_BY_THE_CD28_FAMILY	53	http://www.broadinstitute.org/gsea/msigdb/cards/REACTOME_COSTIMULATION_BY_THE_CD28_FAMILY	0.21742	0.8238	0.7168	0.97224	1	0.245	0.176	0.203	0.98014	0.449
c2_cp_v5	REACTOME_NFKB_AND_MAP_KINASES_ACTIVATION_MEDIATED_BY_TLR4_SIGNALING_REPERTOIRE	67	http://www.broadinstitute.org/gsea/msigdb/cards/REACTOME_NFKB_AND_MAP_KINASES_ACTIVATION_MEDIATED_BY_TLR4_SIGNALING_REPERTOIRE	0.22592	0.93224	0.5636	0.97248	1	0.328	0.266	0.242	0.97571	0.456
c2_cp_v5	REACTOME_TRANSPORT_TO_THE_GOLGI_AND_SUBSEQUENT_MODIFICATION	29	http://www.broadinstitute.org/gsea/msigdb/cards/REACTOME_TRANSPORT_TO_THE_GOLGI_AND_SUBSEQUENT_MODIFICATION	-0.19549	-0.60704	0.901	0.97279	1	0.31	0.261	0.23	0.98096	0.282
c2_cp_v5	SIG_CHEMOTAXIS	40	http://www.broadinstitute.org/gsea/msigdb/cards/SIG_CHEMOTAXIS	0.24224	0.75993	0.759	0.97297	1	0.25	0.205	0.199	0.98209	0.426
c2_cp_v5	KEGG_PROGESTERONE_MEDIATED_OOCYTE_MATURATION	73	http://www.broadinstitute.org/gsea/msigdb/cards/KEGG_PROGESTERONE_MEDIATED_OOCYTE_MATURATION	0.17796	0.7332	0.9251	0.97323	1	0.397	0.344	0.262	0.98224	0.41
c2_cp_v5	BIOCARTA_RHO_PATHWAY	32	http://www.broadinstitute.org/gsea/msigdb/cards/BIOCARTA_RHO_PATHWAY	-0.20298	-0.62029	0.9141	0.97352	1	0.156	0.142	0.134	0.98169	0.309
c2_cp_v5	REACTOME_LATENT_INFECTION_OF_HOMO_SAPIENS_WITH_MYCOBACTERIUM_TUBERCULOSIS	26	http://www.broadinstitute.org/gsea/msigdb/cards/REACTOME_LATENT_INFECTION_OF_HOMO_SAPIENS_WITH_MYCOBACTERIUM_TUBERCULOSIS	0.29183	0.82724	0.6713	0.97383	1	0.346	0.196	0.279	0.98407	0.453
c2_cp_v5	BIOCARTA_DEATH_PATHWAY	32	http://www.broadinstitute.org/gsea/msigdb/cards/BIOCARTA_DEATH_PATHWAY	0.20591	0.7428	0.8538	0.97389	1	0.281	0.266	0.207	0.98366	0.422
c2_cp_v5	REACTOME_SIGNALING_BY_ILS	97	http://www.broadinstitute.org/gsea/msigdb/cards/REACTOME_SIGNALING_BY_ILS	0.21228	0.87275	0.6279	0.97391	1	0.299	0.266	0.221	0.98256	0.458
c2_cp_v5	KEGG_RENAL_CELL_CARCINOMA	65	http://www.broadinstitute.org/gsea/msigdb/cards/KEGG_RENAL_CELL_CARCINOMA	0.18016	0.70253	0.9089	0.974	1	0.385	0.356	0.249	0.98486	0.389
c2_cp_v5	REACTOME_PLATELET_ACTIVATION_SIGNALING_AND_AGGREGATION	172	http://www.broadinstitute.org/gsea/msigdb/cards/REACTOME_PLATELET_ACTIVATION_SIGNALING_AND_AGGREGATION	0.19641	0.76888	0.871	0.97407	1	0.256	0.213	0.204	0.98448	0.436
c2_cp_v5	KEGG_COMPLEMENT_AND_COAGULATION_CASCADES	45	http://www.broadinstitute.org/gsea/msigdb/cards/KEGG_COMPLEMENT_AND_COAGULATION_CASCADES	0.29529	0.75681	0.8227	0.97414	1	0.489	0.258	0.364	0.98438	0.438
c2_cp_v5	REACTOME_ASPARAGINE_N_LINKED_GLYCOSYLATION	75	http://www.broadinstitute.org/gsea/msigdb/cards/REACTOME_ASPARAGINE_N_LINKED_GLYCOSYLATION	0.21635	0.68153	0.7525	0.97415	1	0.24	0.203	0.192	0.98384	0.362
c2_cp_v5	KEGG_NOD_LIKE_RECEPTOR_SIGNALING_PATHWAY	57	http://www.broadinstitute.org/gsea/msigdb/cards/KEGG_NOD_LIKE_RECEPTOR_SIGNALING_PATHWAY	0.20016	0.71057	0.8491	0.97468	1	0.298	0.275	0.217	0.98372	0.4
c2_cp_v5	REACTOME_SIGNAL_TRANSDUCTION_BY_L1	33	http://www.broadinstitute.org/gsea/msigdb/cards/REACTOME_SIGNAL_TRANSDUCTION_BY_L1	0.22042	0.73969	0.8288	0.9749	1	0.333	0.281	0.24	0.98478	0.423
c2_cp_v5	REACTOME_P75_NTR_RECEPTOR_MEDIATED_SIGNALLING	69	http://www.broadinstitute.org/gsea/msigdb/cards/REACTOME_P75_NTR_RECEPTOR_MEDIATED_SIGNALLING	-0.15768	-0.62278	0.9727	0.97494	1	0.246	0.245	0.187	0.98338	0.339
c2_cp_v5	KEGG_OOCYTE_MEIOSIS	91	http://www.broadinstitute.org/gsea/msigdb/cards/KEGG_OOCYTE_MEIOSIS	0.2268	0.8845	0.5893	0.97522	1	0.407	0.339	0.271	0.98316	0.461
c2_cp_v5	PID_HIV_NEF_PATHWAY	34	http://www.broadinstitute.org/gsea/msigdb/cards/PID_HIV_NEF_PATHWAY	0.21768	0.73434	0.7985	0.97533	1	0.176	0.156	0.149	0.98521	0.418
c2_cp_v5	REACTOME_ANTIGEN_PROCESSING_CROSS_PRESENTATION	63	http://www.broadinstitute.org/gsea/msigdb/cards/REACTOME_ANTIGEN_PROCESSING_CROSS_PRESENTATION	0.25664	0.76068	0.7012	0.97551	1	0.54	0.344	0.356	0.98487	0.437
c2_cp_v5	KEGG_TGF_BETA_SIGNALING_PATHWAY	66	http://www.broadinstitute.org/gsea/msigdb/cards/KEGG_TGF_BETA_SIGNALING_PATHWAY	0.18997	0.74399	0.8844	0.97562	1	0.364	0.328	0.246	0.98482	0.433
c2_cp_v5	KEGG_COLORECTAL_CANCER	59	http://www.broadinstitute.org/gsea/msigdb/cards/KEGG_COLORECTAL_CANCER	0.18307	0.68627	0.8978	0.97562	1	0.288	0.277	0.209	0.98444	0.382
c2_cp_v5	PID_CXCR4_PATHWAY	95	http://www.broadinstitute.org/gsea/msigdb/cards/PID_CXCR4_PATHWAY	0.17878	0.6832	0.9282	0.97572	1	0.316	0.302	0.222	0.98524	0.385
c2_cp_v5	PID_MAPK_TRK_PATHWAY	32	http://www.broadinstitute.org/gsea/msigdb/cards/PID_MAPK_TRK_PATHWAY	0.26384	0.87397	0.6121	0.97574	1	0.375	0.274	0.273	0.98412	0.461
c2_cp_v5	REACTOME_MRNA_SPLICING	105	http://www.broadinstitute.org/gsea/msigdb/cards/REACTOME_MRNA_SPLICING	0.18321	0.70406	0.6871	0.97574	1	0.438	0.383	0.273	0.98652	0.4
c2_cp_v5	REACTOME_REGULATION_OF_MRNA_STABILITY_BY_PROTEINS_THAT_BIND_AU_RICH_ELEMENTS	79	http://www.broadinstitute.org/gsea/msigdb/cards/REACTOME_REGULATION_OF_MRNA_STABILITY_BY_PROTEINS_THAT_BIND_AU_RICH_ELEMENTS	0.26599	0.88215	0.5596	0.97606	1	0.468	0.344	0.309	0.98343	0.464
c2_cp_v5	REACTOME_ANTIGEN_ACTIVATES_B_CELL_RECEPTOR_LEADING_TO_GENERATION_OF_SECOND_MESSENGERS	29	http://www.broadinstitute.org/gsea/msigdb/cards/REACTOME_ANTIGEN_ACTIVATES_B_CELL_RECEPTOR_LEADING_TO_GENERATION_OF_SECOND_MESSENGERS	0.20353	0.67279	0.8636	0.97623	1	0.414	0.351	0.269	0.98563	0.376
c2_cp_v5	BIOCARTA_TCR_PATHWAY	44	http://www.broadinstitute.org/gsea/msigdb/cards/BIOCARTA_TCR_PATHWAY	0.23878	0.92416	0.5734	0.97634	1	0.205	0.168	0.171	0.97894	0.456
c2_cp_v5	PID_AURORA_B_PATHWAY	39	http://www.broadinstitute.org/gsea/msigdb/cards/PID_AURORA_B_PATHWAY	0.25021	0.73616	0.7074	0.97644	1	0.205	0.205	0.163	0.9861	0.428
c2_cp_v5	REACTOME_PKB_MEDIATED_EVENTS	25	http://www.broadinstitute.org/gsea/msigdb/cards/REACTOME_PKB_MEDIATED_EVENTS	0.24005	0.82791	0.6838	0.97691	1	0.2	0.169	0.167	0.98687	0.458
c2_cp_v5	KEGG_INTESTINAL_IMMUNE_NETWORK_FOR_IGA_PRODUCTION	27	http://www.broadinstitute.org/gsea/msigdb/cards/KEGG_INTESTINAL_IMMUNE_NETWORK_FOR_IGA_PRODUCTION	0.29013	0.87752	0.6427	0.9771	1	0.519	0.289	0.37	0.98706	0.468
c2_cp_v5	PID_RETINOIC_ACID_PATHWAY	28	http://www.broadinstitute.org/gsea/msigdb/cards/PID_RETINOIC_ACID_PATHWAY	0.26639	0.87547	0.635	0.97717	1	0.357	0.259	0.265	0.98641	0.466
c2_cp_v5	REACTOME_CYTOKINE_SIGNALING_IN_IMMUNE_SYSTEM	222	http://www.broadinstitute.org/gsea/msigdb/cards/REACTOME_CYTOKINE_SIGNALING_IN_IMMUNE_SYSTEM	0.16242	0.6971	0.9154	0.97721	1	0.189	0.204	0.153	0.98769	0.415
c2_cp_v5	REACTOME_TOLL_RECEPTOR_CASCADES	107	http://www.broadinstitute.org/gsea/msigdb/cards/REACTOME_TOLL_RECEPTOR_CASCADES	0.17238	0.76431	0.8959	0.97743	1	0.29	0.266	0.215	0.98789	0.447
c2_cp_v5	REACTOME_RNA_POL_III_TRANSCRIPTION_INITIATION_FROM_TYPE_3_PROMOTER	26	http://www.broadinstitute.org/gsea/msigdb/cards/REACTOME_RNA_POL_III_TRANSCRIPTION_INITIATION_FROM_TYPE_3_PROMOTER	0.21927	0.69067	0.8294	0.97755	1	0.192	0.16	0.162	0.98717	0.413
c2_cp_v5	KEGG_VIBRIO_CHOLERAE_INFECTION	46	http://www.broadinstitute.org/gsea/msigdb/cards/KEGG_VIBRIO_CHOLERAE_INFECTION	-0.18711	-0.62359	0.9289	0.97769	1	0.239	0.218	0.188	0.98604	0.368
c2_cp_v5	REACTOME_CLASS_B_2_SECRETIN_FAMILY_RECEPTORS	49	http://www.broadinstitute.org/gsea/msigdb/cards/REACTOME_CLASS_B_2_SECRETIN_FAMILY_RECEPTORS	0.24539	0.85654	0.7094	0.97775	1	0.143	0.117	0.127	0.98858	0.47
c6_all_v5	KRAS.KIDNEY_UP.V1_DN	72	http://www.broadinstitute.org/gsea/msigdb/cards/KRAS.KIDNEY_UP.V1_DN	-0.44635	-1.5774	0.01101	0.97828	0.422	0.417	0.179	0.344	0	0.366
h_all_v5	HALLMARK_INTERFERON_GAMMA_RESPONSE	188	http://www.broadinstitute.org/gsea/msigdb/cards/HALLMARK_INTERFERON_GAMMA_RESPONSE	-0.2716	-0.91698	0.5494	0.97846	1	0.293	0.227	0.229	0.99077	0.485
c2_cp_v5	REACTOME_IMMUNOREGULATORY_INTERACTIONS_BETWEEN_A_LYMPHOID_AND_A_NON_LYMPHOID_CELL	53	http://www.broadinstitute.org/gsea/msigdb/cards/REACTOME_IMMUNOREGULATORY_INTERACTIONS_BETWEEN_A_LYMPHOID_AND_A_NON_LYMPHOID_CELL	-0.2063	-0.58034	0.9329	0.97853	1	0.189	0.126	0.166	0.98536	0.302
c2_cp_v5	KEGG_LEUKOCYTE_TRANSENDOTHELIAL_MIGRATION	92	http://www.broadinstitute.org/gsea/msigdb/cards/KEGG_LEUKOCYTE_TRANSENDOTHELIAL_MIGRATION	0.18875	0.68671	0.9223	0.97857	1	0.0978	0.0542	0.0932	0.98769	0.416
c6_all_v5	LTE2_UP.V1_DN	165	http://www.broadinstitute.org/gsea/msigdb/cards/LTE2_UP.V1_DN	-0.18902	-0.69838	0.9226	0.97909	1	0.182	0.173	0.152	0.98851	0.304
c2_cp_v5	KEGG_ENDOMETRIAL_CANCER	50	http://www.broadinstitute.org/gsea/msigdb/cards/KEGG_ENDOMETRIAL_CANCER	-0.16161	-0.57269	0.9816	0.97916	1	0.18	0.196	0.145	0.98662	0.299
c2_cp_v5	KEGG_TYPE_II_DIABETES_MELLITUS	33	http://www.broadinstitute.org/gsea/msigdb/cards/KEGG_TYPE_II_DIABETES_MELLITUS	0.22696	0.74407	0.8597	0.97922	1	0.273	0.252	0.204	0.98838	0.447
c2_cp_v5	REACTOME_PLATELET_AGGREGATION_PLUG_FORMATION	31	http://www.broadinstitute.org/gsea/msigdb/cards/REACTOME_PLATELET_AGGREGATION_PLUG_FORMATION	0.27187	0.76071	0.8072	0.97931	1	0.226	0.163	0.189	0.98876	0.452
c2_cp_v5	REACTOME_PI3K_AKT_ACTIVATION	33	http://www.broadinstitute.org/gsea/msigdb/cards/REACTOME_PI3K_AKT_ACTIVATION	-0.17933	-0.6254	0.9309	0.9795	1	0.182	0.184	0.149	0.98806	0.379
c2_cp_v5	KEGG_CITRATE_CYCLE_TCA_CYCLE	27	http://www.broadinstitute.org/gsea/msigdb/cards/KEGG_CITRATE_CYCLE_TCA_CYCLE	0.30768	0.87861	0.5379	0.97961	1	0.222	0.202	0.178	0.98779	0.474
c2_cp_v5	PID_REELIN_PATHWAY	25	http://www.broadinstitute.org/gsea/msigdb/cards/PID_REELIN_PATHWAY	-0.18655	-0.58393	0.9679	0.97981	1	0.24	0.232	0.185	0.98673	0.331
c2_cp_v5	PID_ANGIOPOIETIN_RECEPTOR_PATHWAY	44	http://www.broadinstitute.org/gsea/msigdb/cards/PID_ANGIOPOIETIN_RECEPTOR_PATHWAY	0.26669	0.92478	0.5578	0.98006	1	0.205	0.134	0.178	0.98232	0.469
c2_cp_v5	REACTOME_ASSOCIATION_OF_TRIC_CCT_WITH_TARGET_PROTEINS_DURING_BIOSYNTHESIS	26	http://www.broadinstitute.org/gsea/msigdb/cards/REACTOME_ASSOCIATION_OF_TRIC_CCT_WITH_TARGET_PROTEINS_DURING_BIOSYNTHESIS	0.20493	0.69116	0.822	0.98045	1	0.538	0.367	0.342	0.99058	0.435
c6_all_v5	GCNP_SHH_UP_EARLY.V1_UP	143	http://www.broadinstitute.org/gsea/msigdb/cards/GCNP_SHH_UP_EARLY.V1_UP	-0.16068	-0.70786	0.8787	0.98073	1	0.217	0.225	0.17	0.99072	0.365
c2_cp_v5	REACTOME_ACTIVATED_TLR4_SIGNALLING	87	http://www.broadinstitute.org/gsea/msigdb/cards/REACTOME_ACTIVATED_TLR4_SIGNALLING	0.19813	0.82795	0.7585	0.98125	1	0.299	0.266	0.221	0.99111	0.474
c2_cp_v5	BIOCARTA_FAS_PATHWAY	30	http://www.broadinstitute.org/gsea/msigdb/cards/BIOCARTA_FAS_PATHWAY	-0.17361	-0.62703	0.9487	0.98171	1	0.433	0.346	0.284	0.99042	0.412
c6_all_v5	ALK_DN.V1_UP	81	http://www.broadinstitute.org/gsea/msigdb/cards/ALK_DN.V1_UP	0.21728	0.75	0.8877	0.9821	1	0.235	0.211	0.186	0.99456	0.454
c2_cp_v5	KEGG_PPAR_SIGNALING_PATHWAY	50	http://www.broadinstitute.org/gsea/msigdb/cards/KEGG_PPAR_SIGNALING_PATHWAY	0.22749	0.74457	0.8708	0.98218	1	0.34	0.245	0.258	0.99085	0.458
c2_cp_v5	REACTOME_DOWNSTREAM_SIGNALING_OF_ACTIVATED_FGFR	78	http://www.broadinstitute.org/gsea/msigdb/cards/REACTOME_DOWNSTREAM_SIGNALING_OF_ACTIVATED_FGFR	0.16131	0.66296	0.9664	0.98243	1	0.231	0.266	0.17	0.99158	0.425
h_all_v5	HALLMARK_FATTY_ACID_METABOLISM	132	http://www.broadinstitute.org/gsea/msigdb/cards/HALLMARK_FATTY_ACID_METABOLISM	0.2755	1.0249	0.4175	0.98285	0.997	0.341	0.238	0.262	0.98214	0.496
h_all_v5	HALLMARK_P53_PATHWAY	174	http://www.broadinstitute.org/gsea/msigdb/cards/HALLMARK_P53_PATHWAY	-0.2623	-1.0989	0.2722	0.98333	0.975	0.328	0.223	0.258	0.96639	0.475
c2_cp_v5	REACTOME_G_ALPHA_I_SIGNALLING_EVENTS	108	http://www.broadinstitute.org/gsea/msigdb/cards/REACTOME_G_ALPHA_I_SIGNALLING_EVENTS	0.23405	0.82898	0.7504	0.98352	1	0.306	0.209	0.244	0.99466	0.476
c2_cp_v5	REACTOME_AQUAPORIN_MEDIATED_TRANSPORT	32	http://www.broadinstitute.org/gsea/msigdb/cards/REACTOME_AQUAPORIN_MEDIATED_TRANSPORT	0.22798	0.74597	0.8619	0.98384	1	0.156	0.127	0.137	0.9936	0.469
c2_cp_v5	PID_IL2_1PATHWAY	54	http://www.broadinstitute.org/gsea/msigdb/cards/PID_IL2_1PATHWAY	-0.15533	-0.55482	0.9833	0.984	1	0.185	0.207	0.147	0.99261	0.355
c2_cp_v5	SIG_INSULIN_RECEPTOR_PATHWAY_IN_CARDIAC_MYOCYTES	46	http://www.broadinstitute.org/gsea/msigdb/cards/SIG_INSULIN_RECEPTOR_PATHWAY_IN_CARDIAC_MYOCYTES	-0.19638	-0.63247	0.8402	0.98437	1	0.217	0.243	0.165	0.993	0.434
c2_cp_v5	REACTOME_THE_ROLE_OF_NEF_IN_HIV1_REPLICATION_AND_DISEASE_PATHOGENESIS	26	http://www.broadinstitute.org/gsea/msigdb/cards/REACTOME_THE_ROLE_OF_NEF_IN_HIV1_REPLICATION_AND_DISEASE_PATHOGENESIS	0.24284	0.84308	0.6571	0.9847	1	0.308	0.28	0.222	0.99379	0.487
c2_cp_v5	KEGG_ACUTE_MYELOID_LEUKEMIA	56	http://www.broadinstitute.org/gsea/msigdb/cards/KEGG_ACUTE_MYELOID_LEUKEMIA	0.24584	0.83677	0.666	0.98495	1	0.375	0.295	0.265	0.99522	0.483
c2_cp_v5	REACTOME_MAP_KINASE_ACTIVATION_IN_TLR_CASCADE	47	http://www.broadinstitute.org/gsea/msigdb/cards/REACTOME_MAP_KINASE_ACTIVATION_IN_TLR_CASCADE	-0.17024	-0.62707	0.9298	0.98505	1	0.191	0.204	0.153	0.99381	0.438
c2_cp_v5	KEGG_RNA_DEGRADATION	56	http://www.broadinstitute.org/gsea/msigdb/cards/KEGG_RNA_DEGRADATION	0.17429	0.6363	0.8455	0.98527	1	0.321	0.286	0.23	0.99302	0.442
c2_cp_v5	KEGG_VASOPRESSIN_REGULATED_WATER_REABSORPTION	37	http://www.broadinstitute.org/gsea/msigdb/cards/KEGG_VASOPRESSIN_REGULATED_WATER_REABSORPTION	0.22668	0.83228	0.6686	0.98532	1	0.135	0.0841	0.124	0.99563	0.485
c2_cp_v5	REACTOME_CIRCADIAN_CLOCK	45	http://www.broadinstitute.org/gsea/msigdb/cards/REACTOME_CIRCADIAN_CLOCK	0.23418	0.83867	0.6789	0.98538	1	0.289	0.183	0.237	0.99569	0.488
c2_cp_v5	REACTOME_SIGNALING_BY_ERBB4	73	http://www.broadinstitute.org/gsea/msigdb/cards/REACTOME_SIGNALING_BY_ERBB4	0.22121	0.92489	0.5669	0.98548	1	0.274	0.266	0.202	0.98793	0.482
c2_cp_v5	REACTOME_NGF_SIGNALLING_VIA_TRKA_FROM_THE_PLASMA_MEMBRANE	121	http://www.broadinstitute.org/gsea/msigdb/cards/REACTOME_NGF_SIGNALLING_VIA_TRKA_FROM_THE_PLASMA_MEMBRANE	0.17157	0.74731	0.8702	0.98565	1	0.273	0.266	0.202	0.99514	0.475
c2_cp_v5	PID_HEDGEHOG_GLI_PATHWAY	43	http://www.broadinstitute.org/gsea/msigdb/cards/PID_HEDGEHOG_GLI_PATHWAY	-0.14624	-0.5432	0.9822	0.9858	1	0.093	0.104	0.0836	0.99314	0.362
c2_cp_v5	KEGG_T_CELL_RECEPTOR_SIGNALING_PATHWAY	99	http://www.broadinstitute.org/gsea/msigdb/cards/KEGG_T_CELL_RECEPTOR_SIGNALING_PATHWAY	0.21616	0.83414	0.6783	0.98589	1	0.212	0.18	0.175	0.99544	0.491
c2_cp_v5	PID_IL2_STAT5_PATHWAY	27	http://www.broadinstitute.org/gsea/msigdb/cards/PID_IL2_STAT5_PATHWAY	0.20803	0.6429	0.935	0.98645	1	0.0741	0.0589	0.0699	0.99397	0.456
c2_cp_v5	SIG_PIP3_SIGNALING_IN_CARDIAC_MYOCTES	61	http://www.broadinstitute.org/gsea/msigdb/cards/SIG_PIP3_SIGNALING_IN_CARDIAC_MYOCTES	-0.17171	-0.63821	0.9397	0.98647	1	0.295	0.316	0.203	0.99511	0.466
c2_cp_v5	KEGG_INOSITOL_PHOSPHATE_METABOLISM	45	http://www.broadinstitute.org/gsea/msigdb/cards/KEGG_INOSITOL_PHOSPHATE_METABOLISM	-0.19951	-0.65035	0.9195	0.9865	1	0.2	0.158	0.169	0.99665	0.463
c2_cp_v5	KEGG_BLADDER_CANCER	39	http://www.broadinstitute.org/gsea/msigdb/cards/KEGG_BLADDER_CANCER	0.24482	0.8485	0.7055	0.98657	1	0.179	0.142	0.154	0.99728	0.492
c2_cp_v5	KEGG_ANTIGEN_PROCESSING_AND_PRESENTATION	45	http://www.broadinstitute.org/gsea/msigdb/cards/KEGG_ANTIGEN_PROCESSING_AND_PRESENTATION	0.26879	0.84425	0.6552	0.98682	1	0.2	0.0995	0.181	0.99498	0.49
c2_cp_v5	REACTOME_APOPTOTIC_EXECUTION_PHASE	41	http://www.broadinstitute.org/gsea/msigdb/cards/REACTOME_APOPTOTIC_EXECUTION_PHASE	-0.14414	-0.53134	1	0.98686	1	1	0.856	0.144	0.99415	0.377
c2_cp_v5	SIG_IL4RECEPTOR_IN_B_LYPHOCYTES	27	http://www.broadinstitute.org/gsea/msigdb/cards/SIG_IL4RECEPTOR_IN_B_LYPHOCYTES	0.16499	0.48268	0.9786	0.98691	1	0.222	0.266	0.163	0.99154	0.182
c2_cp_v5	PID_IL12_STAT4_PATHWAY	29	http://www.broadinstitute.org/gsea/msigdb/cards/PID_IL12_STAT4_PATHWAY	0.20657	0.64608	0.9234	0.98702	1	0.069	0.0357	0.0667	0.99545	0.456
c2_cp_v5	REACTOME_IL1_SIGNALING	35	http://www.broadinstitute.org/gsea/msigdb/cards/REACTOME_IL1_SIGNALING	0.19058	0.6383	0.9	0.98702	1	0.2	0.183	0.164	0.99463	0.458
c2_cp_v5	REACTOME_TCR_SIGNALING	44	http://www.broadinstitute.org/gsea/msigdb/cards/REACTOME_TCR_SIGNALING	0.2424	0.82937	0.6922	0.98711	1	0.227	0.18	0.187	0.99862	0.492
c2_cp_v5	REACTOME_INTEGRATION_OF_ENERGY_METABOLISM	82	http://www.broadinstitute.org/gsea/msigdb/cards/REACTOME_INTEGRATION_OF_ENERGY_METABOLISM	0.19716	0.85037	0.7903	0.98713	1	0.0854	0.0543	0.0812	0.99689	0.496
c2_cp_v5	KEGG_REGULATION_OF_ACTIN_CYTOSKELETON	173	http://www.broadinstitute.org/gsea/msigdb/cards/KEGG_REGULATION_OF_ACTIN_CYTOSKELETON	-0.1543	-0.63299	0.9873	0.98732	1	0.116	0.131	0.102	0.99612	0.468
c2_cp_v5	PID_CD8_TCR_DOWNSTREAM_PATHWAY	50	http://www.broadinstitute.org/gsea/msigdb/cards/PID_CD8_TCR_DOWNSTREAM_PATHWAY	0.22203	0.83964	0.7072	0.98783	1	0.12	0.0856	0.11	0.99798	0.497
c2_cp_v5	REACTOME_INTERFERON_GAMMA_SIGNALING	45	http://www.broadinstitute.org/gsea/msigdb/cards/REACTOME_INTERFERON_GAMMA_SIGNALING	-0.1607	-0.49534	0.9868	0.98787	1	0.178	0.2	0.143	0.99367	0.327
h_all_v5	HALLMARK_G2M_CHECKPOINT	191	http://www.broadinstitute.org/gsea/msigdb/cards/HALLMARK_G2M_CHECKPOINT	0.14109	0.47467	0.9524	0.9881	1	0.346	0.332	0.234	1	0.77
c2_cp_v5	PID_RHOA_REG_PATHWAY	39	http://www.broadinstitute.org/gsea/msigdb/cards/PID_RHOA_REG_PATHWAY	-0.19433	-0.63964	0.9338	0.98876	1	0.462	0.332	0.309	0.998	0.485
c2_cp_v5	PID_P75_NTR_PATHWAY	60	http://www.broadinstitute.org/gsea/msigdb/cards/PID_P75_NTR_PATHWAY	0.15778	0.65212	0.9693	0.98877	1	0.25	0.256	0.187	0.99793	0.478
h_all_v5	HALLMARK_TNFA_SIGNALING_VIA_NFKB	183	http://www.broadinstitute.org/gsea/msigdb/cards/HALLMARK_TNFA_SIGNALING_VIA_NFKB	-0.17413	-0.61244	0.9617	0.98893	1	0.197	0.179	0.164	0.99793	0.499
c2_cp_v5	PID_AVB3_OPN_PATHWAY	30	http://www.broadinstitute.org/gsea/msigdb/cards/PID_AVB3_OPN_PATHWAY	-0.19531	-0.65086	0.9228	0.98954	1	0.367	0.331	0.246	0.99998	0.5
c6_all_v5	AKT_UP.V1_UP	129	http://www.broadinstitute.org/gsea/msigdb/cards/AKT_UP.V1_UP	0.19349	0.76602	0.892	0.98961	1	0.287	0.224	0.225	1	0.519
c2_cp_v5	REACTOME_APOPTOTIC_CLEAVAGE_OF_CELLULAR_PROTEINS	33	http://www.broadinstitute.org/gsea/msigdb/cards/REACTOME_APOPTOTIC_CLEAVAGE_OF_CELLULAR_PROTEINS	0.14557	0.48504	0.998	0.98966	1	0.333	0.308	0.231	0.99433	0.301
c2_cp_v5	PID_E2F_PATHWAY	68	http://www.broadinstitute.org/gsea/msigdb/cards/PID_E2F_PATHWAY	-0.15587	-0.49992	0.9635	0.98991	1	0.191	0.199	0.154	0.99597	0.391
c2_cp_v5	KEGG_N_GLYCAN_BIOSYNTHESIS	44	http://www.broadinstitute.org/gsea/msigdb/cards/KEGG_N_GLYCAN_BIOSYNTHESIS	0.22684	0.64642	0.8193	0.99012	1	0.318	0.234	0.245	0.99849	0.485
c6_all_v5	CYCLIN_D1_UP.V1_UP	131	http://www.broadinstitute.org/gsea/msigdb/cards/CYCLIN_D1_UP.V1_UP	0.18041	0.75554	0.9283	0.99019	1	0.359	0.309	0.25	1	0.511
c2_cp_v5	PID_FCER1_PATHWAY	59	http://www.broadinstitute.org/gsea/msigdb/cards/PID_FCER1_PATHWAY	-0.1327	-0.50995	0.996	0.99032	1	0.373	0.339	0.247	0.99686	0.423
c2_cp_v5	KEGG_FC_EPSILON_RI_SIGNALING_PATHWAY	62	http://www.broadinstitute.org/gsea/msigdb/cards/KEGG_FC_EPSILON_RI_SIGNALING_PATHWAY	0.23208	0.84446	0.7047	0.99099	1	0.323	0.266	0.238	0.99936	0.499
c2_cp_v5	BIOCARTA_PDGF_PATHWAY	32	http://www.broadinstitute.org/gsea/msigdb/cards/BIOCARTA_PDGF_PATHWAY	-0.19227	-0.64101	0.9113	0.99109	1	0.375	0.349	0.245	1	0.515
c2_cp_v5	BIOCARTA_ALK_PATHWAY	26	http://www.broadinstitute.org/gsea/msigdb/cards/BIOCARTA_ALK_PATHWAY	-0.20206	-0.65276	0.9071	0.9912	1	0.308	0.295	0.217	1	0.517
c2_cp_v5	PID_PLK1_PATHWAY	44	http://www.broadinstitute.org/gsea/msigdb/cards/PID_PLK1_PATHWAY	-0.14825	-0.44552	0.9605	0.99142	1	0.273	0.276	0.198	0.99618	0.305
c2_cp_v5	REACTOME_PYRUVATE_METABOLISM_AND_CITRIC_ACID_TCA_CYCLE	37	http://www.broadinstitute.org/gsea/msigdb/cards/REACTOME_PYRUVATE_METABOLISM_AND_CITRIC_ACID_TCA_CYCLE	0.19084	0.62353	0.8907	0.99169	1	0.189	0.202	0.151	0.99943	0.495
c2_cp_v5	PID_KIT_PATHWAY	48	http://www.broadinstitute.org/gsea/msigdb/cards/PID_KIT_PATHWAY	0.17631	0.58004	0.9519	0.9919	1	0.396	0.312	0.273	0.99903	0.485
c6_all_v5	MTOR_UP.V1_UP	124	http://www.broadinstitute.org/gsea/msigdb/cards/MTOR_UP.V1_UP	0.19172	0.78321	0.849	0.99194	1	0.274	0.222	0.215	1	0.534
c2_cp_v5	PID_TGFBR_PATHWAY	52	http://www.broadinstitute.org/gsea/msigdb/cards/PID_TGFBR_PATHWAY	-0.098824	-0.41922	1	0.99197	1	0.327	0.362	0.209	0.9962	0.319
c2_cp_v5	SIG_BCR_SIGNALING_PATHWAY	45	http://www.broadinstitute.org/gsea/msigdb/cards/SIG_BCR_SIGNALING_PATHWAY	0.15077	0.48817	0.9881	0.99207	1	0.289	0.266	0.213	0.99655	0.396
c2_cp_v5	REACTOME_DOWNSTREAM_TCR_SIGNALING	27	http://www.broadinstitute.org/gsea/msigdb/cards/REACTOME_DOWNSTREAM_TCR_SIGNALING	0.15813	0.53404	0.9817	0.99213	1	0.481	0.382	0.298	0.99829	0.459
c6_all_v5	CYCLIN_D1_KE_.V1_UP	147	http://www.broadinstitute.org/gsea/msigdb/cards/CYCLIN_D1_KE_.V1_UP	0.16565	0.77356	0.9384	0.99335	1	0.347	0.309	0.242	1	0.53
c2_cp_v5	PID_ILK_PATHWAY	44	http://www.broadinstitute.org/gsea/msigdb/cards/PID_ILK_PATHWAY	0.15679	0.60012	0.9826	0.99395	1	0.409	0.344	0.269	1	0.52
c2_cp_v5	PID_FOXM1_PATHWAY	38	http://www.broadinstitute.org/gsea/msigdb/cards/PID_FOXM1_PATHWAY	-0.20499	-0.65356	0.8917	0.99402	1	0.132	0.103	0.118	1	0.545
c2_cp_v5	REACTOME_UNFOLDED_PROTEIN_RESPONSE	71	http://www.broadinstitute.org/gsea/msigdb/cards/REACTOME_UNFOLDED_PROTEIN_RESPONSE	-0.13394	-0.44794	0.9858	0.99418	1	0.254	0.268	0.186	0.99906	0.455
c2_cp_v5	PID_ERBB4_PATHWAY	31	http://www.broadinstitute.org/gsea/msigdb/cards/PID_ERBB4_PATHWAY	0.17604	0.58104	0.9886	0.99469	1	0.0968	0.0744	0.0898	1	0.531
c2_cp_v5	KEGG_PANCREATIC_CANCER	66	http://www.broadinstitute.org/gsea/msigdb/cards/KEGG_PANCREATIC_CANCER	0.15734	0.58757	0.9669	0.99473	1	0.394	0.356	0.255	1	0.525
c2_cp_v5	KEGG_LEISHMANIA_INFECTION	49	http://www.broadinstitute.org/gsea/msigdb/cards/KEGG_LEISHMANIA_INFECTION	0.14317	0.50363	0.9942	0.99484	1	0.143	0.172	0.119	0.99974	0.494
c2_cp_v5	REACTOME_FACTORS_INVOLVED_IN_MEGAKARYOCYTE_DEVELOPMENT_AND_PLATELET_PRODUCTION	87	http://www.broadinstitute.org/gsea/msigdb/cards/REACTOME_FACTORS_INVOLVED_IN_MEGAKARYOCYTE_DEVELOPMENT_AND_PLATELET_PRODUCTION	0.12361	0.48924	0.9959	0.99502	1	0.218	0.259	0.163	0.9995	0.487
c2_cp_v5	REACTOME_MRNA_3_END_PROCESSING	33	http://www.broadinstitute.org/gsea/msigdb/cards/REACTOME_MRNA_3_END_PROCESSING	0.15323	0.61384	0.8664	0.99517	1	1	0.847	0.153	1	0.534
c2_cp_v5	ST_TUMOR_NECROSIS_FACTOR_PATHWAY	29	http://www.broadinstitute.org/gsea/msigdb/cards/ST_TUMOR_NECROSIS_FACTOR_PATHWAY	0.16109	0.53424	0.9535	0.99531	1	0.069	0.0345	0.0667	1	0.532
c2_cp_v5	PID_SMAD2_3NUCLEAR_PATHWAY	68	http://www.broadinstitute.org/gsea/msigdb/cards/PID_SMAD2_3NUCLEAR_PATHWAY	0.10523	0.39811	1	0.99536	1	0.118	0.17	0.0981	0.99762	0.481
c6_all_v5	TBK1.DF_DN	255	http://www.broadinstitute.org/gsea/msigdb/cards/TBK1.DF_DN	-0.14779	-0.6244	0.9643	0.99541	1	0.275	0.285	0.2	0.99923	0.471
c2_cp_v5	PID_BETA_CATENIN_NUC_PATHWAY	62	http://www.broadinstitute.org/gsea/msigdb/cards/PID_BETA_CATENIN_NUC_PATHWAY	0.1418	0.54178	0.9902	0.99573	1	0.258	0.274	0.188	1	0.532
c2_cp_v5	PID_IL6_7_PATHWAY	46	http://www.broadinstitute.org/gsea/msigdb/cards/PID_IL6_7_PATHWAY	0.18601	0.60255	0.974	0.99578	1	0.261	0.266	0.192	1	0.546
c6_all_v5	ESC_J1_UP_LATE.V1_DN	143	http://www.broadinstitute.org/gsea/msigdb/cards/ESC_J1_UP_LATE.V1_DN	0.16266	0.72605	0.9452	0.99683	1	0.245	0.252	0.185	1	0.567
c2_cp_v5	REACTOME_DIABETES_PATHWAYS	110	http://www.broadinstitute.org/gsea/msigdb/cards/REACTOME_DIABETES_PATHWAYS	0.12959	0.50722	0.9941	0.99708	1	0.245	0.272	0.18	1	0.552
c2_cp_v5	PID_BCR_5PATHWAY	65	http://www.broadinstitute.org/gsea/msigdb/cards/PID_BCR_5PATHWAY	-0.17587	-0.65407	0.8869	0.9971	1	0.215	0.236	0.165	1	0.569
c2_cp_v5	ST_INTEGRIN_SIGNALING_PATHWAY	76	http://www.broadinstitute.org/gsea/msigdb/cards/ST_INTEGRIN_SIGNALING_PATHWAY	0.14648	0.55329	0.9879	0.99777	1	0.316	0.303	0.221	1	0.557
c2_cp_v5	PID_TRAIL_PATHWAY	28	http://www.broadinstitute.org/gsea/msigdb/cards/PID_TRAIL_PATHWAY	0.16993	0.58791	0.9574	0.99792	1	0.0714	0.0574	0.0675	1	0.562
c2_cp_v5	PID_IL2_PI3K_PATHWAY	31	http://www.broadinstitute.org/gsea/msigdb/cards/PID_IL2_PI3K_PATHWAY	0.18188	0.60414	0.9491	0.99818	1	0.0323	0.003	0.0322	1	0.566
c2_cp_v5	PID_TELOMERASE_PATHWAY	66	http://www.broadinstitute.org/gsea/msigdb/cards/PID_TELOMERASE_PATHWAY	0.12633	0.54304	0.998	0.99852	1	0.227	0.288	0.163	1	0.577
c6_all_v5	EIF4E_UP	77	http://www.broadinstitute.org/gsea/msigdb/cards/EIF4E_UP	-0.14956	-0.51408	0.9855	0.99896	1	0.221	0.233	0.17	1	0.926
c2_cp_v5	BIOCARTA_RACCYCD_PATHWAY	26	http://www.broadinstitute.org/gsea/msigdb/cards/BIOCARTA_RACCYCD_PATHWAY	-0.20353	-0.65567	0.86	0.99927	1	0.231	0.229	0.178	1	0.582
c6_all_v5	BCAT_BILD_ET_AL_DN	41	http://www.broadinstitute.org/gsea/msigdb/cards/BCAT_BILD_ET_AL_DN	0.13009	0.44485	0.9981	0.99991	1	0.244	0.28	0.176	1	0.991
c2_cp_v5	KEGG_TYROSINE_METABOLISM	27	http://www.broadinstitute.org/gsea/msigdb/cards/KEGG_TYROSINE_METABOLISM	0.6517	1.8165	0.002066	1	0.351	0.593	0.223	0.461	0	0.25
c2_cp_v5	REACTOME_CHROMOSOME_MAINTENANCE	73	http://www.broadinstitute.org/gsea/msigdb/cards/REACTOME_CHROMOSOME_MAINTENANCE	0.5257	1.6956	0.04449	1	0.671	0.575	0.343	0.38	0.45259	0.286
c2_cp_v5	REACTOME_INTERACTIONS_OF_VPR_WITH_HOST_CELLULAR_PROTEINS	32	http://www.broadinstitute.org/gsea/msigdb/cards/REACTOME_INTERACTIONS_OF_VPR_WITH_HOST_CELLULAR_PROTEINS	0.48284	1.6401	0.05477	1	0.802	0.312	0.186	0.255	0.66316	0.374
c2_cp_v5	REACTOME_TRANSCRIPTION_COUPLED_NER_TC_NER	42	http://www.broadinstitute.org/gsea/msigdb/cards/REACTOME_TRANSCRIPTION_COUPLED_NER_TC_NER	0.53126	1.6316	0.0496	1	0.82	0.714	0.337	0.475	0.57102	0.337
c2_cp_v5	REACTOME_NUCLEOTIDE_EXCISION_REPAIR	47	http://www.broadinstitute.org/gsea/msigdb/cards/REACTOME_NUCLEOTIDE_EXCISION_REPAIR	0.50764	1.6257	0.06433	1	0.83	0.681	0.337	0.453	0.50725	0.281
c2_cp_v5	REACTOME_RNA_POL_II_TRANSCRIPTION_PRE_INITIATION_AND_PROMOTER_OPENING	39	http://www.broadinstitute.org/gsea/msigdb/cards/REACTOME_RNA_POL_II_TRANSCRIPTION_PRE_INITIATION_AND_PROMOTER_OPENING	0.52705	1.625	0.03918	1	0.832	0.436	0.196	0.351	0.43478	0.247
c2_cp_v5	REACTOME_MEIOTIC_SYNAPSIS	26	http://www.broadinstitute.org/gsea/msigdb/cards/REACTOME_MEIOTIC_SYNAPSIS	0.47991	1.6087	0.04656	1	0.858	0.5	0.368	0.317	0.46008	0.255
c2_cp_v5	PID_ATM_PATHWAY	34	http://www.broadinstitute.org/gsea/msigdb/cards/PID_ATM_PATHWAY	0.18238	0.55338	0.8966	1	1	0.529	0.379	0.33	1	0.607
c2_cp_v5	PID_NECTIN_PATHWAY	29	http://www.broadinstitute.org/gsea/msigdb/cards/PID_NECTIN_PATHWAY	-0.553	-1.7564	0.0102	1	0.538	0.379	0.131	0.33	0.82805	0.439
c2_cp_v5	REACTOME_POTASSIUM_CHANNELS	44	http://www.broadinstitute.org/gsea/msigdb/cards/REACTOME_POTASSIUM_CHANNELS	-0.49329	-1.5983	0.01064	1	0.886	0.318	0.138	0.275	1	0.721
c2_cp_v5	NABA_BASEMENT_MEMBRANES	28	http://www.broadinstitute.org/gsea/msigdb/cards/NABA_BASEMENT_MEMBRANES	-0.53738	-1.5922	0.02648	1	0.896	0.607	0.177	0.5	1	0.634
c2_cp_v5	REACTOME_AMINO_ACID_AND_OLIGOPEPTIDE_SLC_TRANSPORTERS	31	http://www.broadinstitute.org/gsea/msigdb/cards/REACTOME_AMINO_ACID_AND_OLIGOPEPTIDE_SLC_TRANSPORTERS	-0.51604	-1.5145	0.05533	1	0.967	0.29	0.125	0.254	1	0.785
c2_cp_v5	PID_AJDISS_2PATHWAY	37	http://www.broadinstitute.org/gsea/msigdb/cards/PID_AJDISS_2PATHWAY	-0.42651	-1.4989	0.03586	1	0.976	0.27	0.129	0.236	1	0.769
c2_cp_v5	REACTOME_TRANSPORT_OF_INORGANIC_CATIONS_ANIONS_AND_AMINO_ACIDS_OLIGOPEPTIDES	55	http://www.broadinstitute.org/gsea/msigdb/cards/REACTOME_TRANSPORT_OF_INORGANIC_CATIONS_ANIONS_AND_AMINO_ACIDS_OLIGOPEPTIDES	-0.44474	-1.426	0.07484	1	0.996	0.382	0.192	0.31	1	0.889
c2_cp_v5	BIOCARTA_AGR_PATHWAY	29	http://www.broadinstitute.org/gsea/msigdb/cards/BIOCARTA_AGR_PATHWAY	-0.44327	-1.4131	0.06626	1	0.999	0.276	0.144	0.237	1	0.885
c2_cp_v5	KEGG_ABC_TRANSPORTERS	29	http://www.broadinstitute.org/gsea/msigdb/cards/KEGG_ABC_TRANSPORTERS	-0.45827	-1.3816	0.1067	1	0.999	0.483	0.255	0.36	1	0.913
c2_cp_v5	REACTOME_PLATELET_HOMEOSTASIS	57	http://www.broadinstitute.org/gsea/msigdb/cards/REACTOME_PLATELET_HOMEOSTASIS	-0.34057	-1.3584	0.04867	1	0.999	0.211	0.116	0.187	1	0.929
c2_cp_v5	REACTOME_NEUROTRANSMITTER_RECEPTOR_BINDING_AND_DOWNSTREAM_TRANSMISSION_IN_THE_POSTSYNAPTIC_CELL	81	http://www.broadinstitute.org/gsea/msigdb/cards/REACTOME_NEUROTRANSMITTER_RECEPTOR_BINDING_AND_DOWNSTREAM_TRANSMISSION_IN_THE_POSTSYNAPTIC_CELL	-0.32038	-1.3436	0.04425	1	1	0.259	0.184	0.213	1	0.938
c2_cp_v5	REACTOME_SIGNALLING_TO_ERKS	31	http://www.broadinstitute.org/gsea/msigdb/cards/REACTOME_SIGNALLING_TO_ERKS	-0.36803	-1.2889	0.1637	1	1	0.226	0.116	0.2	1	0.976
c2_cp_v5	REACTOME_MUSCLE_CONTRACTION	37	http://www.broadinstitute.org/gsea/msigdb/cards/REACTOME_MUSCLE_CONTRACTION	-0.40848	-1.2828	0.1739	1	1	0.243	0.0917	0.222	1	0.974
c2_cp_v5	REACTOME_HEPARAN_SULFATE_HEPARIN_HS_GAG_METABOLISM	34	http://www.broadinstitute.org/gsea/msigdb/cards/REACTOME_HEPARAN_SULFATE_HEPARIN_HS_GAG_METABOLISM	-0.42263	-1.2807	0.156	1	1	0.412	0.213	0.325	1	0.969
c2_cp_v5	KEGG_NEUROACTIVE_LIGAND_RECEPTOR_INTERACTION	94	http://www.broadinstitute.org/gsea/msigdb/cards/KEGG_NEUROACTIVE_LIGAND_RECEPTOR_INTERACTION	-0.34901	-1.2781	0.1014	1	1	0.255	0.136	0.222	1	0.962
c2_cp_v5	REACTOME_NEURONAL_SYSTEM	151	http://www.broadinstitute.org/gsea/msigdb/cards/REACTOME_NEURONAL_SYSTEM	-0.29879	-1.2755	0.07991	1	1	0.325	0.262	0.242	1	0.957
c2_cp_v5	PID_NCADHERIN_PATHWAY	30	http://www.broadinstitute.org/gsea/msigdb/cards/PID_NCADHERIN_PATHWAY	-0.3876	-1.2686	0.1964	1	1	0.267	0.134	0.231	1	0.953
c2_cp_v5	KEGG_ECM_RECEPTOR_INTERACTION	67	http://www.broadinstitute.org/gsea/msigdb/cards/KEGG_ECM_RECEPTOR_INTERACTION	-0.39984	-1.2645	0.1642	1	1	0.373	0.18	0.307	1	0.948
c2_cp_v5	PID_AR_PATHWAY	56	http://www.broadinstitute.org/gsea/msigdb/cards/PID_AR_PATHWAY	-0.33134	-1.239	0.2135	1	1	0.179	0.122	0.157	1	0.969
c2_cp_v5	PID_PTP1B_PATHWAY	46	http://www.broadinstitute.org/gsea/msigdb/cards/PID_PTP1B_PATHWAY	-0.33399	-1.2339	0.1623	1	1	0.348	0.252	0.261	1	0.967
c2_cp_v5	REACTOME_NCAM1_INTERACTIONS	25	http://www.broadinstitute.org/gsea/msigdb/cards/REACTOME_NCAM1_INTERACTIONS	-0.42223	-1.2331	0.2239	1	1	0.4	0.168	0.333	1	0.964
c2_cp_v5	REACTOME_GABA_B_RECEPTOR_ACTIVATION	27	http://www.broadinstitute.org/gsea/msigdb/cards/REACTOME_GABA_B_RECEPTOR_ACTIVATION	-0.37475	-1.2326	0.15	1	1	0.407	0.239	0.311	1	0.95
c2_cp_v5	REACTOME_GABA_RECEPTOR_ACTIVATION	31	http://www.broadinstitute.org/gsea/msigdb/cards/REACTOME_GABA_RECEPTOR_ACTIVATION	-0.35746	-1.23	0.1409	1	1	0.387	0.239	0.295	1	0.946
c2_cp_v5	REACTOME_GOLGI_ASSOCIATED_VESICLE_BIOGENESIS	47	http://www.broadinstitute.org/gsea/msigdb/cards/REACTOME_GOLGI_ASSOCIATED_VESICLE_BIOGENESIS	-0.2968	-1.2235	0.1757	1	1	0.362	0.249	0.273	1	0.944
c2_cp_v5	REACTOME_EXTRACELLULAR_MATRIX_ORGANIZATION	48	http://www.broadinstitute.org/gsea/msigdb/cards/REACTOME_EXTRACELLULAR_MATRIX_ORGANIZATION	-0.41261	-1.2079	0.2375	1	1	0.312	0.135	0.271	1	0.956
c2_cp_v5	PID_A6B1_A6B4_INTEGRIN_PATHWAY	41	http://www.broadinstitute.org/gsea/msigdb/cards/PID_A6B1_A6B4_INTEGRIN_PATHWAY	-0.34769	-1.2049	0.2354	1	1	0.439	0.245	0.332	1	0.953
c2_cp_v5	PID_AR_NONGENOMIC_PATHWAY	28	http://www.broadinstitute.org/gsea/msigdb/cards/PID_AR_NONGENOMIC_PATHWAY	-0.39023	-1.1997	0.2521	1	1	0.25	0.148	0.213	1	0.951
c2_cp_v5	KEGG_ARACHIDONIC_ACID_METABOLISM	34	http://www.broadinstitute.org/gsea/msigdb/cards/KEGG_ARACHIDONIC_ACID_METABOLISM	-0.38744	-1.1966	0.2156	1	1	0.441	0.237	0.337	1	0.944
c2_cp_v5	REACTOME_TRANSCRIPTIONAL_ACTIVITY_OF_SMAD2_SMAD3_SMAD4_HETEROTRIMER	35	http://www.broadinstitute.org/gsea/msigdb/cards/REACTOME_TRANSCRIPTIONAL_ACTIVITY_OF_SMAD2_SMAD3_SMAD4_HETEROTRIMER	-0.35275	-1.1911	0.2555	1	1	0.257	0.199	0.206	1	0.945
c2_cp_v5	PID_LYSOPHOSPHOLIPID_PATHWAY	57	http://www.broadinstitute.org/gsea/msigdb/cards/PID_LYSOPHOSPHOLIPID_PATHWAY	-0.32137	-1.1866	0.2107	1	1	0.333	0.24	0.254	1	0.945
c2_cp_v5	REACTOME_TRANSMISSION_ACROSS_CHEMICAL_SYNAPSES	108	http://www.broadinstitute.org/gsea/msigdb/cards/REACTOME_TRANSMISSION_ACROSS_CHEMICAL_SYNAPSES	-0.27495	-1.1849	0.1605	1	1	0.315	0.257	0.236	1	0.941
c2_cp_v5	REACTOME_THROMBIN_SIGNALLING_THROUGH_PROTEINASE_ACTIVATED_RECEPTORS_PARS	26	http://www.broadinstitute.org/gsea/msigdb/cards/REACTOME_THROMBIN_SIGNALLING_THROUGH_PROTEINASE_ACTIVATED_RECEPTORS_PARS	-0.35815	-1.1788	0.2277	1	1	0.423	0.261	0.313	1	0.941
c2_cp_v5	PID_DELTA_NP63_PATHWAY	38	http://www.broadinstitute.org/gsea/msigdb/cards/PID_DELTA_NP63_PATHWAY	-0.32633	-1.1761	0.2227	1	1	0.184	0.109	0.165	1	0.938
c2_cp_v5	PID_PI3K_PLC_TRK_PATHWAY	31	http://www.broadinstitute.org/gsea/msigdb/cards/PID_PI3K_PLC_TRK_PATHWAY	-0.36529	-1.1722	0.261	1	1	0.29	0.184	0.238	1	0.935
c2_cp_v5	REACTOME_INTERFERON_ALPHA_BETA_SIGNALING	44	http://www.broadinstitute.org/gsea/msigdb/cards/REACTOME_INTERFERON_ALPHA_BETA_SIGNALING	-0.40643	-1.1715	0.2821	1	1	0.295	0.207	0.235	1	0.93
c2_cp_v5	PID_INTEGRIN_A4B1_PATHWAY	32	http://www.broadinstitute.org/gsea/msigdb/cards/PID_INTEGRIN_A4B1_PATHWAY	-0.36358	-1.1672	0.2733	1	1	0.281	0.205	0.224	1	0.931
c2_cp_v5	REACTOME_TRANSMEMBRANE_TRANSPORT_OF_SMALL_MOLECULES	259	http://www.broadinstitute.org/gsea/msigdb/cards/REACTOME_TRANSMEMBRANE_TRANSPORT_OF_SMALL_MOLECULES	-0.27792	-1.1666	0.2065	1	1	0.309	0.242	0.239	1	0.927
c2_cp_v5	NABA_CORE_MATRISOME	146	http://www.broadinstitute.org/gsea/msigdb/cards/NABA_CORE_MATRISOME	-0.32586	-1.1663	0.2244	1	1	0.336	0.186	0.276	1	0.919
c2_cp_v5	REACTOME_SIGNAL_AMPLIFICATION	25	http://www.broadinstitute.org/gsea/msigdb/cards/REACTOME_SIGNAL_AMPLIFICATION	-0.35833	-1.1662	0.2402	1	1	0.48	0.257	0.357	1	0.911
c2_cp_v5	REACTOME_CELL_SURFACE_INTERACTIONS_AT_THE_VASCULAR_WALL	72	http://www.broadinstitute.org/gsea/msigdb/cards/REACTOME_CELL_SURFACE_INTERACTIONS_AT_THE_VASCULAR_WALL	-0.32489	-1.1639	0.2381	1	1	0.292	0.195	0.236	1	0.905
c2_cp_v5	PID_ECADHERIN_NASCENT_AJ_PATHWAY	39	http://www.broadinstitute.org/gsea/msigdb/cards/PID_ECADHERIN_NASCENT_AJ_PATHWAY	-0.30621	-1.1613	0.2547	1	1	0.179	0.131	0.156	1	0.902
c2_cp_v5	PID_P53_REGULATION_PATHWAY	54	http://www.broadinstitute.org/gsea/msigdb/cards/PID_P53_REGULATION_PATHWAY	-0.3134	-1.1611	0.3182	1	1	0.167	0.116	0.148	1	0.896
c2_cp_v5	PID_SYNDECAN_1_PATHWAY	33	http://www.broadinstitute.org/gsea/msigdb/cards/PID_SYNDECAN_1_PATHWAY	-0.42393	-1.1518	0.2954	1	1	0.333	0.168	0.278	1	0.905
c2_cp_v5	BIOCARTA_PPARA_PATHWAY	51	http://www.broadinstitute.org/gsea/msigdb/cards/BIOCARTA_PPARA_PATHWAY	-0.29041	-1.1483	0.218	1	1	0.235	0.156	0.199	1	0.905
c2_cp_v5	REACTOME_SIGNALING_BY_PDGF	110	http://www.broadinstitute.org/gsea/msigdb/cards/REACTOME_SIGNALING_BY_PDGF	-0.28931	-1.148	0.2601	1	1	0.273	0.207	0.218	1	0.9
c2_cp_v5	PID_RAS_PATHWAY	28	http://www.broadinstitute.org/gsea/msigdb/cards/PID_RAS_PATHWAY	-0.33635	-1.1471	0.2495	1	1	0.321	0.218	0.252	1	0.89
c2_cp_v5	REACTOME_TRANSPORT_OF_GLUCOSE_AND_OTHER_SUGARS_BILE_SALTS_AND_ORGANIC_ACIDS_METAL_IONS_AND_AMINE_COMPOUNDS	41	http://www.broadinstitute.org/gsea/msigdb/cards/REACTOME_TRANSPORT_OF_GLUCOSE_AND_OTHER_SUGARS_BILE_SALTS_AND_ORGANIC_ACIDS_METAL_IONS_AND_AMINE_COMPOUNDS	-0.32563	-1.1468	0.2458	1	1	0.22	0.133	0.191	1	0.88
c2_cp_v5	ST_G_ALPHA_I_PATHWAY	27	http://www.broadinstitute.org/gsea/msigdb/cards/ST_G_ALPHA_I_PATHWAY	-0.36435	-1.1462	0.2651	1	1	0.222	0.144	0.191	1	0.875
c2_cp_v5	REACTOME_TRANS_GOLGI_NETWORK_VESICLE_BUDDING	54	http://www.broadinstitute.org/gsea/msigdb/cards/REACTOME_TRANS_GOLGI_NETWORK_VESICLE_BUDDING	-0.27353	-1.1432	0.2354	1	1	0.333	0.249	0.251	1	0.871
c2_cp_v5	KEGG_DILATED_CARDIOMYOPATHY	62	http://www.broadinstitute.org/gsea/msigdb/cards/KEGG_DILATED_CARDIOMYOPATHY	-0.31209	-1.1342	0.2148	1	1	0.226	0.144	0.194	1	0.885
c2_cp_v5	KEGG_GNRH_SIGNALING_PATHWAY	75	http://www.broadinstitute.org/gsea/msigdb/cards/KEGG_GNRH_SIGNALING_PATHWAY	-0.26597	-1.129	0.2397	1	1	0.267	0.201	0.214	1	0.887
c2_cp_v5	ST_GRANULE_CELL_SURVIVAL_PATHWAY	26	http://www.broadinstitute.org/gsea/msigdb/cards/ST_GRANULE_CELL_SURVIVAL_PATHWAY	-0.32911	-1.1279	0.264	1	1	0.538	0.339	0.356	1	0.882
c2_cp_v5	PID_ECADHERIN_STABILIZATION_PATHWAY	39	http://www.broadinstitute.org/gsea/msigdb/cards/PID_ECADHERIN_STABILIZATION_PATHWAY	-0.32354	-1.1274	0.2733	1	1	0.333	0.207	0.265	1	0.872
c2_cp_v5	REACTOME_NCAM_SIGNALING_FOR_NEURITE_OUT_GROWTH	48	http://www.broadinstitute.org/gsea/msigdb/cards/REACTOME_NCAM_SIGNALING_FOR_NEURITE_OUT_GROWTH	-0.31211	-1.1265	0.2706	1	1	0.25	0.168	0.209	1	0.865
c2_cp_v5	REACTOME_SLC_MEDIATED_TRANSMEMBRANE_TRANSPORT	147	http://www.broadinstitute.org/gsea/msigdb/cards/REACTOME_SLC_MEDIATED_TRANSMEMBRANE_TRANSPORT	-0.28392	-1.1258	0.271	1	1	0.211	0.149	0.181	1	0.864
c2_cp_v5	ST_WNT_BETA_CATENIN_PATHWAY	26	http://www.broadinstitute.org/gsea/msigdb/cards/ST_WNT_BETA_CATENIN_PATHWAY	-0.35596	-1.1257	0.2879	1	1	0.346	0.263	0.256	1	0.851
c2_cp_v5	PID_RAC1_PATHWAY	51	http://www.broadinstitute.org/gsea/msigdb/cards/PID_RAC1_PATHWAY	-0.30474	-1.1068	0.3086	1	1	0.216	0.15	0.184	1	0.889
c2_cp_v5	PID_INSULIN_PATHWAY	41	http://www.broadinstitute.org/gsea/msigdb/cards/PID_INSULIN_PATHWAY	-0.30915	-1.1056	0.334	1	1	0.317	0.236	0.243	1	0.884
c2_cp_v5	REACTOME_SYNTHESIS_OF_PIPS_AT_THE_PLASMA_MEMBRANE	27	http://www.broadinstitute.org/gsea/msigdb/cards/REACTOME_SYNTHESIS_OF_PIPS_AT_THE_PLASMA_MEMBRANE	-0.37316	-1.103	0.3467	1	1	0.333	0.131	0.29	1	0.881
c2_cp_v5	NABA_ECM_GLYCOPROTEINS	107	http://www.broadinstitute.org/gsea/msigdb/cards/NABA_ECM_GLYCOPROTEINS	-0.30713	-1.1026	0.289	1	1	0.299	0.182	0.247	1	0.874
c2_cp_v5	KEGG_CALCIUM_SIGNALING_PATHWAY	101	http://www.broadinstitute.org/gsea/msigdb/cards/KEGG_CALCIUM_SIGNALING_PATHWAY	-0.27569	-1.0965	0.286	1	1	0.178	0.124	0.157	1	0.88
c2_cp_v5	PID_FAK_PATHWAY	57	http://www.broadinstitute.org/gsea/msigdb/cards/PID_FAK_PATHWAY	-0.30906	-1.0958	0.328	1	1	0.193	0.131	0.168	1	0.874
c2_cp_v5	KEGG_VIRAL_MYOCARDITIS	42	http://www.broadinstitute.org/gsea/msigdb/cards/KEGG_VIRAL_MYOCARDITIS	-0.31123	-1.0902	0.3363	1	1	0.31	0.195	0.25	1	0.885
c2_cp_v5	REACTOME_BIOLOGICAL_OXIDATIONS	67	http://www.broadinstitute.org/gsea/msigdb/cards/REACTOME_BIOLOGICAL_OXIDATIONS	-0.28716	-1.0875	0.3136	1	1	0.313	0.165	0.263	1	0.884
c2_cp_v5	ST_GA13_PATHWAY	33	http://www.broadinstitute.org/gsea/msigdb/cards/ST_GA13_PATHWAY	-0.28694	-1.0862	0.3489	1	1	0.333	0.245	0.252	1	0.876
c2_cp_v5	PID_THROMBIN_PAR1_PATHWAY	40	http://www.broadinstitute.org/gsea/msigdb/cards/PID_THROMBIN_PAR1_PATHWAY	-0.3268	-1.0862	0.3487	1	1	0.375	0.24	0.286	1	0.867
c2_cp_v5	REACTOME_PHASE_II_CONJUGATION	38	http://www.broadinstitute.org/gsea/msigdb/cards/REACTOME_PHASE_II_CONJUGATION	-0.31075	-1.0832	0.3237	1	1	0.316	0.159	0.266	1	0.863
c2_cp_v5	PID_ENDOTHELIN_PATHWAY	55	http://www.broadinstitute.org/gsea/msigdb/cards/PID_ENDOTHELIN_PATHWAY	-0.28789	-1.0829	0.337	1	1	0.327	0.24	0.25	1	0.859
c2_cp_v5	KEGG_EPITHELIAL_CELL_SIGNALING_IN_HELICOBACTER_PYLORI_INFECTION	61	http://www.broadinstitute.org/gsea/msigdb/cards/KEGG_EPITHELIAL_CELL_SIGNALING_IN_HELICOBACTER_PYLORI_INFECTION	-0.28797	-1.076	0.3542	1	1	0.311	0.204	0.249	1	0.869
c2_cp_v5	NABA_ECM_AFFILIATED	86	http://www.broadinstitute.org/gsea/msigdb/cards/NABA_ECM_AFFILIATED	-0.31271	-1.0695	0.3341	1	1	0.372	0.217	0.293	1	0.874
c2_cp_v5	REACTOME_OPIOID_SIGNALLING	65	http://www.broadinstitute.org/gsea/msigdb/cards/REACTOME_OPIOID_SIGNALLING	-0.25227	-1.0691	0.3447	1	1	0.108	0.0556	0.102	1	0.869
c2_cp_v5	KEGG_ADHERENS_JUNCTION	68	http://www.broadinstitute.org/gsea/msigdb/cards/KEGG_ADHERENS_JUNCTION	-0.28749	-1.0676	0.3539	1	1	0.206	0.156	0.175	1	0.865
c2_cp_v5	REACTOME_CHONDROITIN_SULFATE_DERMATAN_SULFATE_METABOLISM	34	http://www.broadinstitute.org/gsea/msigdb/cards/REACTOME_CHONDROITIN_SULFATE_DERMATAN_SULFATE_METABOLISM	-0.33535	-1.0581	0.3745	1	1	0.353	0.213	0.278	1	0.881
c2_cp_v5	PID_NOTCH_PATHWAY	51	http://www.broadinstitute.org/gsea/msigdb/cards/PID_NOTCH_PATHWAY	-0.2793	-1.0577	0.3571	1	1	0.294	0.193	0.238	1	0.88
c2_cp_v5	REACTOME_G_ALPHA1213_SIGNALLING_EVENTS	63	http://www.broadinstitute.org/gsea/msigdb/cards/REACTOME_G_ALPHA1213_SIGNALLING_EVENTS	-0.30169	-1.0548	0.3779	1	1	0.397	0.258	0.296	1	0.881
c2_cp_v5	REACTOME_GAB1_SIGNALOSOME	35	http://www.broadinstitute.org/gsea/msigdb/cards/REACTOME_GAB1_SIGNALOSOME	-0.30811	-1.0525	0.3992	1	1	0.257	0.184	0.21	1	0.879
c2_cp_v5	REACTOME_PEPTIDE_LIGAND_BINDING_RECEPTORS	79	http://www.broadinstitute.org/gsea/msigdb/cards/REACTOME_PEPTIDE_LIGAND_BINDING_RECEPTORS	-0.31833	-1.0505	0.3536	1	1	0.203	0.101	0.183	1	0.876
c2_cp_v5	KEGG_AXON_GUIDANCE	93	http://www.broadinstitute.org/gsea/msigdb/cards/KEGG_AXON_GUIDANCE	-0.25291	-1.0501	0.3494	1	1	0.172	0.115	0.153	1	0.868
c2_cp_v5	REACTOME_SIGNALING_BY_GPCR	340	http://www.broadinstitute.org/gsea/msigdb/cards/REACTOME_SIGNALING_BY_GPCR	-0.23278	-1.0456	0.3397	1	1	0.312	0.245	0.242	1	0.875
c2_cp_v5	PID_INTEGRIN1_PATHWAY	55	http://www.broadinstitute.org/gsea/msigdb/cards/PID_INTEGRIN1_PATHWAY	-0.35013	-1.0454	0.4099	1	1	0.382	0.181	0.314	1	0.864
c2_cp_v5	PID_CDC42_PATHWAY	66	http://www.broadinstitute.org/gsea/msigdb/cards/PID_CDC42_PATHWAY	-0.28024	-1.0445	0.3825	1	1	0.273	0.235	0.21	1	0.861
c2_cp_v5	BIOCARTA_MPR_PATHWAY	29	http://www.broadinstitute.org/gsea/msigdb/cards/BIOCARTA_MPR_PATHWAY	-0.32728	-1.0432	0.4008	1	1	0.172	0.0714	0.16	1	0.859
c2_cp_v5	PID_ERBB1_RECEPTOR_PROXIMAL_PATHWAY	34	http://www.broadinstitute.org/gsea/msigdb/cards/PID_ERBB1_RECEPTOR_PROXIMAL_PATHWAY	-0.31284	-1.0372	0.4061	1	1	0.206	0.131	0.179	1	0.865
c2_cp_v5	REACTOME_G_PROTEIN_BETA_GAMMA_SIGNALLING	25	http://www.broadinstitute.org/gsea/msigdb/cards/REACTOME_G_PROTEIN_BETA_GAMMA_SIGNALLING	-0.327	-1.0349	0.411	1	1	0.16	0.0556	0.151	1	0.865
c2_cp_v5	PID_RB_1PATHWAY	56	http://www.broadinstitute.org/gsea/msigdb/cards/PID_RB_1PATHWAY	-0.29865	-1.0346	0.4202	1	1	0.214	0.156	0.182	1	0.859
c2_cp_v5	PID_TXA2PATHWAY	53	http://www.broadinstitute.org/gsea/msigdb/cards/PID_TXA2PATHWAY	-0.30409	-1.0294	0.4036	1	1	0.396	0.24	0.302	1	0.867
c2_cp_v5	PID_CXCR3_PATHWAY	40	http://www.broadinstitute.org/gsea/msigdb/cards/PID_CXCR3_PATHWAY	-0.30784	-1.0285	0.4012	1	1	0.375	0.269	0.275	1	0.861
c2_cp_v5	KEGG_GLIOMA	59	http://www.broadinstitute.org/gsea/msigdb/cards/KEGG_GLIOMA	-0.28446	-1.028	0.418	1	1	0.271	0.199	0.218	1	0.851
c2_cp_v5	REACTOME_SIGNALING_BY_FGFR_MUTANTS	30	http://www.broadinstitute.org/gsea/msigdb/cards/REACTOME_SIGNALING_BY_FGFR_MUTANTS	-0.32305	-1.0278	0.4177	1	1	0.3	0.221	0.234	1	0.844
c2_cp_v5	PID_ERBB2_ERBB3_PATHWAY	41	http://www.broadinstitute.org/gsea/msigdb/cards/PID_ERBB2_ERBB3_PATHWAY	-0.29542	-1.0261	0.4317	1	1	0.0976	0.049	0.0931	1	0.841
c2_cp_v5	REACTOME_GASTRIN_CREB_SIGNALLING_PATHWAY_VIA_PKC_AND_MAPK	116	http://www.broadinstitute.org/gsea/msigdb/cards/REACTOME_GASTRIN_CREB_SIGNALLING_PATHWAY_VIA_PKC_AND_MAPK	-0.23513	-1.0253	0.3945	1	1	0.267	0.212	0.213	1	0.837
c2_cp_v5	REACTOME_COLLAGEN_FORMATION	36	http://www.broadinstitute.org/gsea/msigdb/cards/REACTOME_COLLAGEN_FORMATION	-0.37535	-1.0228	0.4328	1	1	0.306	0.135	0.265	1	0.842
c2_cp_v5	PID_ER_NONGENOMIC_PATHWAY	39	http://www.broadinstitute.org/gsea/msigdb/cards/PID_ER_NONGENOMIC_PATHWAY	-0.31295	-1.0219	0.4087	1	1	0.385	0.24	0.293	1	0.837
c2_cp_v5	NABA_ECM_REGULATORS	123	http://www.broadinstitute.org/gsea/msigdb/cards/NABA_ECM_REGULATORS	-0.28919	-1.0214	0.4069	1	1	0.236	0.141	0.204	1	0.833
c2_cp_v5	PID_WNT_NONCANONICAL_PATHWAY	30	http://www.broadinstitute.org/gsea/msigdb/cards/PID_WNT_NONCANONICAL_PATHWAY	-0.30875	-1.0195	0.4188	1	1	0.333	0.266	0.245	1	0.829
c2_cp_v5	PID_P38_ALPHA_BETA_DOWNSTREAM_PATHWAY	37	http://www.broadinstitute.org/gsea/msigdb/cards/PID_P38_ALPHA_BETA_DOWNSTREAM_PATHWAY	-0.2766	-1.0176	0.4379	1	1	0.297	0.201	0.238	1	0.829
c2_cp_v5	REACTOME_SIGNALING_BY_NOTCH1	60	http://www.broadinstitute.org/gsea/msigdb/cards/REACTOME_SIGNALING_BY_NOTCH1	-0.25252	-1.015	0.44	1	1	0.167	0.113	0.149	1	0.83
c2_cp_v5	NABA_MATRISOME_ASSOCIATED	366	http://www.broadinstitute.org/gsea/msigdb/cards/NABA_MATRISOME_ASSOCIATED	-0.2543	-1.0131	0.4411	1	1	0.232	0.159	0.201	1	0.83
c2_cp_v5	KEGG_GAP_JUNCTION	68	http://www.broadinstitute.org/gsea/msigdb/cards/KEGG_GAP_JUNCTION	-0.2609	-1.0088	0.4444	1	1	0.25	0.199	0.201	1	0.836
c2_cp_v5	REACTOME_CHEMOKINE_RECEPTORS_BIND_CHEMOKINES	43	http://www.broadinstitute.org/gsea/msigdb/cards/REACTOME_CHEMOKINE_RECEPTORS_BIND_CHEMOKINES	-0.35583	-1.0087	0.4327	1	1	0.465	0.283	0.334	1	0.828
c2_cp_v5	BIOCARTA_INTEGRIN_PATHWAY	34	http://www.broadinstitute.org/gsea/msigdb/cards/BIOCARTA_INTEGRIN_PATHWAY	-0.30238	-1.007	0.4473	1	1	0.147	0.0714	0.137	1	0.827
c2_cp_v5	PID_RHOA_PATHWAY	41	http://www.broadinstitute.org/gsea/msigdb/cards/PID_RHOA_PATHWAY	-0.28173	-1.0051	0.4393	1	1	0.195	0.113	0.174	1	0.821
c2_cp_v5	ST_ADRENERGIC	25	http://www.broadinstitute.org/gsea/msigdb/cards/ST_ADRENERGIC	-0.33032	-1.0041	0.4662	1	1	0.28	0.144	0.24	1	0.813
c2_cp_v5	BIOCARTA_P38MAPK_PATHWAY	37	http://www.broadinstitute.org/gsea/msigdb/cards/BIOCARTA_P38MAPK_PATHWAY	-0.26549	-1.0037	0.466	1	1	0.351	0.278	0.254	1	0.809
c2_cp_v5	REACTOME_ION_CHANNEL_TRANSPORT	30	http://www.broadinstitute.org/gsea/msigdb/cards/REACTOME_ION_CHANNEL_TRANSPORT	-0.31811	-1.0027	0.4467	1	1	0.367	0.262	0.271	1	0.803
c2_cp_v5	KEGG_LONG_TERM_POTENTIATION	51	http://www.broadinstitute.org/gsea/msigdb/cards/KEGG_LONG_TERM_POTENTIATION	-0.24951	-1.0024	0.43	1	1	0.157	0.166	0.131	1	0.798
c2_cp_v5	PID_ARF6_PATHWAY	30	http://www.broadinstitute.org/gsea/msigdb/cards/PID_ARF6_PATHWAY	-0.31329	-1.0011	0.4542	1	1	0.233	0.124	0.205	1	0.793
c2_cp_v5	PID_S1P_S1P3_PATHWAY	27	http://www.broadinstitute.org/gsea/msigdb/cards/PID_S1P_S1P3_PATHWAY	-0.27068	-1.0009	0.4812	1	1	0.333	0.24	0.254	1	0.785
c2_cp_v5	REACTOME_NEGATIVE_REGULATORS_OF_RIG_I_MDA5_SIGNALING	29	http://www.broadinstitute.org/gsea/msigdb/cards/REACTOME_NEGATIVE_REGULATORS_OF_RIG_I_MDA5_SIGNALING	-0.30084	-0.99392	0.4469	1	1	0.207	0.147	0.177	1	0.805
c2_cp_v5	REACTOME_CELL_CELL_JUNCTION_ORGANIZATION	28	http://www.broadinstitute.org/gsea/msigdb/cards/REACTOME_CELL_CELL_JUNCTION_ORGANIZATION	-0.33568	-0.99175	0.4909	1	1	0.429	0.201	0.343	1	0.804
c2_cp_v5	REACTOME_LIPID_DIGESTION_MOBILIZATION_AND_TRANSPORT	36	http://www.broadinstitute.org/gsea/msigdb/cards/REACTOME_LIPID_DIGESTION_MOBILIZATION_AND_TRANSPORT	-0.35111	-0.99133	0.4444	1	1	0.25	0.0777	0.231	1	0.792
c2_cp_v5	BIOCARTA_FCER1_PATHWAY	38	http://www.broadinstitute.org/gsea/msigdb/cards/BIOCARTA_FCER1_PATHWAY	-0.25592	-0.98782	0.499	1	1	0.421	0.349	0.275	1	0.797
c2_cp_v5	BIOCARTA_GPCR_PATHWAY	31	http://www.broadinstitute.org/gsea/msigdb/cards/BIOCARTA_GPCR_PATHWAY	-0.28155	-0.98631	0.4468	1	1	0.161	0.123	0.142	1	0.797
c2_cp_v5	KEGG_HYPERTROPHIC_CARDIOMYOPATHY_HCM	57	http://www.broadinstitute.org/gsea/msigdb/cards/KEGG_HYPERTROPHIC_CARDIOMYOPATHY_HCM	-0.26674	-0.98356	0.4977	1	1	0.158	0.0711	0.147	1	0.8
c2_cp_v5	PID_FAS_PATHWAY	37	http://www.broadinstitute.org/gsea/msigdb/cards/PID_FAS_PATHWAY	-0.28847	-0.98337	0.466	1	1	0.378	0.236	0.29	1	0.793
c2_cp_v5	REACTOME_IRON_UPTAKE_AND_TRANSPORT	30	http://www.broadinstitute.org/gsea/msigdb/cards/REACTOME_IRON_UPTAKE_AND_TRANSPORT	-0.31485	-0.98173	0.4855	1	1	0.367	0.236	0.281	1	0.791
c2_cp_v5	PID_FOXO_PATHWAY	46	http://www.broadinstitute.org/gsea/msigdb/cards/PID_FOXO_PATHWAY	-0.26568	-0.97969	0.4677	1	1	0.261	0.267	0.192	1	0.789
c2_cp_v5	PID_ERBB1_INTERNALIZATION_PATHWAY	38	http://www.broadinstitute.org/gsea/msigdb/cards/PID_ERBB1_INTERNALIZATION_PATHWAY	-0.28419	-0.97543	0.4783	1	1	0.263	0.209	0.209	1	0.799
c2_cp_v5	BIOCARTA_TOLL_PATHWAY	33	http://www.broadinstitute.org/gsea/msigdb/cards/BIOCARTA_TOLL_PATHWAY	-0.24972	-0.97358	0.5141	1	1	0.303	0.219	0.237	1	0.796
c2_cp_v5	KEGG_CHEMOKINE_SIGNALING_PATHWAY	163	http://www.broadinstitute.org/gsea/msigdb/cards/KEGG_CHEMOKINE_SIGNALING_PATHWAY	-0.23411	-0.96939	0.5108	1	1	0.264	0.242	0.202	1	0.803
c2_cp_v5	PID_IL8_CXCR1_PATHWAY	27	http://www.broadinstitute.org/gsea/msigdb/cards/PID_IL8_CXCR1_PATHWAY	-0.31825	-0.96887	0.5219	1	1	0.407	0.239	0.311	1	0.797
c2_cp_v5	REACTOME_G_ALPHA_Q_SIGNALLING_EVENTS	96	http://www.broadinstitute.org/gsea/msigdb/cards/REACTOME_G_ALPHA_Q_SIGNALLING_EVENTS	-0.24313	-0.96634	0.5416	1	1	0.281	0.212	0.223	1	0.802
c2_cp_v5	REACTOME_SIGNALING_BY_NOTCH	87	http://www.broadinstitute.org/gsea/msigdb/cards/REACTOME_SIGNALING_BY_NOTCH	-0.23069	-0.96519	0.5398	1	1	0.161	0.13	0.141	1	0.797
c2_cp_v5	REACTOME_PRE_NOTCH_EXPRESSION_AND_PROCESSING	36	http://www.broadinstitute.org/gsea/msigdb/cards/REACTOME_PRE_NOTCH_EXPRESSION_AND_PROCESSING	-0.25815	-0.95944	0.5266	1	1	0.222	0.189	0.181	1	0.805
c2_cp_v5	PID_TAP63_PATHWAY	45	http://www.broadinstitute.org/gsea/msigdb/cards/PID_TAP63_PATHWAY	-0.25672	-0.95912	0.5168	1	1	0.489	0.364	0.312	1	0.801
c2_cp_v5	REACTOME_PHASE1_FUNCTIONALIZATION_OF_COMPOUNDS	30	http://www.broadinstitute.org/gsea/msigdb/cards/REACTOME_PHASE1_FUNCTIONALIZATION_OF_COMPOUNDS	-0.29159	-0.95539	0.5558	1	1	0.367	0.185	0.299	1	0.807
c2_cp_v5	REACTOME_G_ALPHA_Z_SIGNALLING_EVENTS	34	http://www.broadinstitute.org/gsea/msigdb/cards/REACTOME_G_ALPHA_Z_SIGNALLING_EVENTS	-0.26983	-0.9505	0.5341	1	1	0.353	0.257	0.263	1	0.817
c2_cp_v5	REACTOME_GLYCOSAMINOGLYCAN_METABOLISM	77	http://www.broadinstitute.org/gsea/msigdb/cards/REACTOME_GLYCOSAMINOGLYCAN_METABOLISM	-0.27303	-0.94831	0.5365	1	1	0.286	0.191	0.232	1	0.815
c2_cp_v5	KEGG_PRION_DISEASES	27	http://www.broadinstitute.org/gsea/msigdb/cards/KEGG_PRION_DISEASES	-0.31447	-0.94719	0.5348	1	1	0.296	0.217	0.233	1	0.81
c2_cp_v5	SIG_CD40PATHWAYMAP	33	http://www.broadinstitute.org/gsea/msigdb/cards/SIG_CD40PATHWAYMAP	-0.25729	-0.9454	0.5479	1	1	0.303	0.258	0.226	1	0.809
c2_cp_v5	KEGG_MELANOGENESIS	77	http://www.broadinstitute.org/gsea/msigdb/cards/KEGG_MELANOGENESIS	-0.21525	-0.94269	0.6171	1	1	0.182	0.156	0.154	1	0.814
c2_cp_v5	KEGG_CELL_ADHESION_MOLECULES_CAMS	82	http://www.broadinstitute.org/gsea/msigdb/cards/KEGG_CELL_ADHESION_MOLECULES_CAMS	-0.28773	-0.9423	0.5284	1	1	0.305	0.175	0.253	1	0.806
c2_cp_v5	PID_ERA_GENOMIC_PATHWAY	56	http://www.broadinstitute.org/gsea/msigdb/cards/PID_ERA_GENOMIC_PATHWAY	-0.2364	-0.93492	0.5684	1	1	0.268	0.217	0.211	1	0.83
c2_cp_v5	PID_EPHB_FWD_PATHWAY	36	http://www.broadinstitute.org/gsea/msigdb/cards/PID_EPHB_FWD_PATHWAY	-0.25994	-0.93448	0.5667	1	1	0.194	0.131	0.169	1	0.822
c2_cp_v5	KEGG_TOLL_LIKE_RECEPTOR_SIGNALING_PATHWAY	82	http://www.broadinstitute.org/gsea/msigdb/cards/KEGG_TOLL_LIKE_RECEPTOR_SIGNALING_PATHWAY	-0.23592	-0.93124	0.5476	1	1	0.28	0.236	0.216	1	0.832
c2_cp_v5	REACTOME_ACTIVATION_OF_KAINATE_RECEPTORS_UPON_GLUTAMATE_BINDING	25	http://www.broadinstitute.org/gsea/msigdb/cards/REACTOME_ACTIVATION_OF_KAINATE_RECEPTORS_UPON_GLUTAMATE_BINDING	-0.29121	-0.92967	0.561	1	1	0.12	0.0556	0.114	1	0.824
c2_cp_v5	PID_IFNG_PATHWAY	38	http://www.broadinstitute.org/gsea/msigdb/cards/PID_IFNG_PATHWAY	-0.27082	-0.92939	0.5597	1	1	0.395	0.349	0.258	1	0.82
c2_cp_v5	PID_MTOR_4PATHWAY	68	http://www.broadinstitute.org/gsea/msigdb/cards/PID_MTOR_4PATHWAY	-0.20959	-0.92579	0.5726	1	1	0.118	0.0959	0.107	1	0.827
c2_cp_v5	REACTOME_DOWNSTREAM_SIGNAL_TRANSDUCTION	87	http://www.broadinstitute.org/gsea/msigdb/cards/REACTOME_DOWNSTREAM_SIGNAL_TRANSDUCTION	-0.22315	-0.92512	0.5828	1	1	0.218	0.207	0.174	1	0.815
c2_cp_v5	PID_NFAT_3PATHWAY	53	http://www.broadinstitute.org/gsea/msigdb/cards/PID_NFAT_3PATHWAY	-0.22807	-0.92501	0.5688	1	1	0.377	0.319	0.258	1	0.809
c2_cp_v5	KEGG_GLYCEROPHOSPHOLIPID_METABOLISM	59	http://www.broadinstitute.org/gsea/msigdb/cards/KEGG_GLYCEROPHOSPHOLIPID_METABOLISM	-0.25423	-0.92407	0.5727	1	1	0.288	0.205	0.23	1	0.806
c2_cp_v5	REACTOME_SIGNALING_BY_RHO_GTPASES	100	http://www.broadinstitute.org/gsea/msigdb/cards/REACTOME_SIGNALING_BY_RHO_GTPASES	-0.24109	-0.92247	0.5355	1	1	0.35	0.258	0.262	1	0.807
c2_cp_v5	REACTOME_PI_METABOLISM	42	http://www.broadinstitute.org/gsea/msigdb/cards/REACTOME_PI_METABOLISM	-0.26834	-0.92233	0.5374	1	1	0.238	0.131	0.208	1	0.799
c2_cp_v5	PID_EPO_PATHWAY	32	http://www.broadinstitute.org/gsea/msigdb/cards/PID_EPO_PATHWAY	-0.27065	-0.91912	0.5763	1	1	0.156	0.116	0.138	1	0.802
c2_cp_v5	PID_ALPHA_SYNUCLEIN_PATHWAY	29	http://www.broadinstitute.org/gsea/msigdb/cards/PID_ALPHA_SYNUCLEIN_PATHWAY	-0.27847	-0.91823	0.5576	1	1	0.276	0.184	0.226	1	0.793
c2_cp_v5	REACTOME_GPCR_LIGAND_BINDING	182	http://www.broadinstitute.org/gsea/msigdb/cards/REACTOME_GPCR_LIGAND_BINDING	-0.23868	-0.91777	0.6412	1	1	0.209	0.149	0.18	1	0.788
c2_cp_v5	KEGG_FOCAL_ADHESION	175	http://www.broadinstitute.org/gsea/msigdb/cards/KEGG_FOCAL_ADHESION	-0.22171	-0.91541	0.6255	1	1	0.24	0.207	0.193	1	0.791
c2_cp_v5	KEGG_MAPK_SIGNALING_PATHWAY	206	http://www.broadinstitute.org/gsea/msigdb/cards/KEGG_MAPK_SIGNALING_PATHWAY	-0.19888	-0.91204	0.6498	1	1	0.209	0.204	0.169	1	0.796
c2_cp_v5	KEGG_PATHWAYS_IN_CANCER	269	http://www.broadinstitute.org/gsea/msigdb/cards/KEGG_PATHWAYS_IN_CANCER	-0.20204	-0.91087	0.6295	1	1	0.212	0.205	0.172	1	0.793
c2_cp_v5	PID_CDC42_REG_PATHWAY	28	http://www.broadinstitute.org/gsea/msigdb/cards/PID_CDC42_REG_PATHWAY	-0.28352	-0.90959	0.5885	1	1	0.393	0.263	0.29	1	0.79
c2_cp_v5	KEGG_WNT_SIGNALING_PATHWAY	120	http://www.broadinstitute.org/gsea/msigdb/cards/KEGG_WNT_SIGNALING_PATHWAY	-0.22028	-0.90793	0.6084	1	1	0.175	0.157	0.149	1	0.791
c2_cp_v5	REACTOME_NOTCH1_INTRACELLULAR_DOMAIN_REGULATES_TRANSCRIPTION	40	http://www.broadinstitute.org/gsea/msigdb/cards/REACTOME_NOTCH1_INTRACELLULAR_DOMAIN_REGULATES_TRANSCRIPTION	-0.24414	-0.90624	0.6162	1	1	0.175	0.113	0.156	1	0.792
c2_cp_v5	BIOCARTA_NFAT_PATHWAY	44	http://www.broadinstitute.org/gsea/msigdb/cards/BIOCARTA_NFAT_PATHWAY	-0.24842	-0.90428	0.5769	1	1	0.205	0.173	0.17	1	0.791
c2_cp_v5	PID_MET_PATHWAY	77	http://www.broadinstitute.org/gsea/msigdb/cards/PID_MET_PATHWAY	-0.22704	-0.90258	0.5827	1	1	0.377	0.339	0.25	1	0.789
c2_cp_v5	PID_AR_TF_PATHWAY	43	http://www.broadinstitute.org/gsea/msigdb/cards/PID_AR_TF_PATHWAY	-0.27608	-0.90215	0.5486	1	1	0.256	0.221	0.2	1	0.784
c2_cp_v5	REACTOME_LIPOPROTEIN_METABOLISM	25	http://www.broadinstitute.org/gsea/msigdb/cards/REACTOME_LIPOPROTEIN_METABOLISM	-0.37344	-0.89943	0.5891	1	1	0.32	0.0777	0.296	1	0.784
c2_cp_v5	NABA_COLLAGENS	26	http://www.broadinstitute.org/gsea/msigdb/cards/NABA_COLLAGENS	-0.36172	-0.89904	0.6034	1	1	0.385	0.172	0.319	1	0.779
c2_cp_v5	PID_TRKR_PATHWAY	54	http://www.broadinstitute.org/gsea/msigdb/cards/PID_TRKR_PATHWAY	-0.26254	-0.89651	0.566	1	1	0.167	0.141	0.144	1	0.785
c2_cp_v5	NABA_SECRETED_FACTORS	157	http://www.broadinstitute.org/gsea/msigdb/cards/NABA_SECRETED_FACTORS	-0.23029	-0.89623	0.6591	1	1	0.217	0.155	0.185	1	0.778
c2_cp_v5	PID_INTEGRIN3_PATHWAY	38	http://www.broadinstitute.org/gsea/msigdb/cards/PID_INTEGRIN3_PATHWAY	-0.31317	-0.89507	0.5796	1	1	0.316	0.181	0.259	1	0.777
c2_cp_v5	BIOCARTA_MAPK_PATHWAY	82	http://www.broadinstitute.org/gsea/msigdb/cards/BIOCARTA_MAPK_PATHWAY	-0.22314	-0.8931	0.6039	1	1	0.134	0.0946	0.122	1	0.778
c2_cp_v5	PID_P73PATHWAY	68	http://www.broadinstitute.org/gsea/msigdb/cards/PID_P73PATHWAY	-0.22722	-0.8921	0.6175	1	1	0.176	0.156	0.15	1	0.771
c2_cp_v5	REACTOME_PI3K_EVENTS_IN_ERBB2_SIGNALING	37	http://www.broadinstitute.org/gsea/msigdb/cards/REACTOME_PI3K_EVENTS_IN_ERBB2_SIGNALING	-0.25416	-0.88946	0.5954	1	1	0.243	0.196	0.196	1	0.774
c2_cp_v5	REACTOME_RECYCLING_PATHWAY_OF_L1	25	http://www.broadinstitute.org/gsea/msigdb/cards/REACTOME_RECYCLING_PATHWAY_OF_L1	-0.29862	-0.8888	0.5823	1	1	0.28	0.2	0.224	1	0.767
c2_cp_v5	REACTOME_SIGNALING_BY_ERBB2	88	http://www.broadinstitute.org/gsea/msigdb/cards/REACTOME_SIGNALING_BY_ERBB2	-0.20713	-0.88783	0.6771	1	1	0.205	0.207	0.163	1	0.762
c2_cp_v5	KEGG_CARDIAC_MUSCLE_CONTRACTION	51	http://www.broadinstitute.org/gsea/msigdb/cards/KEGG_CARDIAC_MUSCLE_CONTRACTION	-0.27099	-0.8863	0.5914	1	1	0.216	0.144	0.185	1	0.765
c2_cp_v5	PID_CERAMIDE_PATHWAY	48	http://www.broadinstitute.org/gsea/msigdb/cards/PID_CERAMIDE_PATHWAY	-0.21958	-0.8862	0.6557	1	1	0.292	0.236	0.224	1	0.755
c2_cp_v5	PID_IGF1_PATHWAY	29	http://www.broadinstitute.org/gsea/msigdb/cards/PID_IGF1_PATHWAY	-0.27713	-0.88563	0.6192	1	1	0.448	0.331	0.301	1	0.747
c2_cp_v5	REACTOME_SIGNALING_BY_SCF_KIT	72	http://www.broadinstitute.org/gsea/msigdb/cards/REACTOME_SIGNALING_BY_SCF_KIT	-0.23615	-0.88524	0.6237	1	1	0.208	0.184	0.171	1	0.739
c2_cp_v5	REACTOME_SIGNALING_BY_EGFR_IN_CANCER	99	http://www.broadinstitute.org/gsea/msigdb/cards/REACTOME_SIGNALING_BY_EGFR_IN_CANCER	-0.20538	-0.88303	0.6406	1	1	0.222	0.209	0.177	1	0.738
c2_cp_v5	REACTOME_CELL_JUNCTION_ORGANIZATION	46	http://www.broadinstitute.org/gsea/msigdb/cards/REACTOME_CELL_JUNCTION_ORGANIZATION	-0.26737	-0.8823	0.663	1	1	0.261	0.157	0.221	1	0.735
c2_cp_v5	ST_ERK1_ERK2_MAPK_PATHWAY	30	http://www.broadinstitute.org/gsea/msigdb/cards/ST_ERK1_ERK2_MAPK_PATHWAY	-0.23534	-0.88182	0.6424	1	1	0.233	0.201	0.187	1	0.727
c2_cp_v5	PID_UPA_UPAR_PATHWAY	36	http://www.broadinstitute.org/gsea/msigdb/cards/PID_UPA_UPAR_PATHWAY	-0.32833	-0.88039	0.5979	1	1	0.25	0.172	0.208	1	0.725
c2_cp_v5	BIOCARTA_MYOSIN_PATHWAY	27	http://www.broadinstitute.org/gsea/msigdb/cards/BIOCARTA_MYOSIN_PATHWAY	-0.29715	-0.8792	0.6407	1	1	0.259	0.142	0.223	1	0.72
c2_cp_v5	SIG_PIP3_SIGNALING_IN_B_LYMPHOCYTES	32	http://www.broadinstitute.org/gsea/msigdb/cards/SIG_PIP3_SIGNALING_IN_B_LYMPHOCYTES	-0.29417	-0.87805	0.6194	1	1	0.344	0.238	0.263	1	0.717
c2_cp_v5	KEGG_LONG_TERM_DEPRESSION	47	http://www.broadinstitute.org/gsea/msigdb/cards/KEGG_LONG_TERM_DEPRESSION	-0.23281	-0.87804	0.6566	1	1	0.255	0.199	0.205	1	0.704
c2_cp_v5	PID_CD8_TCR_PATHWAY	50	http://www.broadinstitute.org/gsea/msigdb/cards/PID_CD8_TCR_PATHWAY	-0.25185	-0.87776	0.64	1	1	0.38	0.279	0.275	1	0.694
c2_cp_v5	REACTOME_GPCR_DOWNSTREAM_SIGNALING	263	http://www.broadinstitute.org/gsea/msigdb/cards/REACTOME_GPCR_DOWNSTREAM_SIGNALING	-0.21024	-0.87707	0.7275	1	1	0.319	0.245	0.246	1	0.685
c2_cp_v5	REACTOME_GLYCEROPHOSPHOLIPID_BIOSYNTHESIS	66	http://www.broadinstitute.org/gsea/msigdb/cards/REACTOME_GLYCEROPHOSPHOLIPID_BIOSYNTHESIS	-0.23141	-0.87372	0.6827	1	1	0.258	0.197	0.208	1	0.7
c2_cp_v5	REACTOME_RECRUITMENT_OF_MITOTIC_CENTROSOME_PROTEINS_AND_COMPLEXES	63	http://www.broadinstitute.org/gsea/msigdb/cards/REACTOME_RECRUITMENT_OF_MITOTIC_CENTROSOME_PROTEINS_AND_COMPLEXES	-0.22899	-0.87293	0.5709	1	1	0.317	0.255	0.238	1	0.687
c2_cp_v5	REACTOME_NRAGE_SIGNALS_DEATH_THROUGH_JNK	36	http://www.broadinstitute.org/gsea/msigdb/cards/REACTOME_NRAGE_SIGNALS_DEATH_THROUGH_JNK	-0.276	-0.87064	0.6183	1	1	0.389	0.258	0.289	1	0.692
c2_cp_v5	REACTOME_HEMOSTASIS	351	http://www.broadinstitute.org/gsea/msigdb/cards/REACTOME_HEMOSTASIS	-0.18813	-0.86842	0.7671	1	1	0.217	0.213	0.175	1	0.692
c2_cp_v5	PID_P53_DOWNSTREAM_PATHWAY	122	http://www.broadinstitute.org/gsea/msigdb/cards/PID_P53_DOWNSTREAM_PATHWAY	-0.2056	-0.86781	0.7196	1	1	0.213	0.183	0.176	1	0.687
c2_cp_v5	KEGG_NON_SMALL_CELL_LUNG_CANCER	51	http://www.broadinstitute.org/gsea/msigdb/cards/KEGG_NON_SMALL_CELL_LUNG_CANCER	-0.24864	-0.86478	0.5992	1	1	0.275	0.199	0.221	1	0.691
c2_cp_v5	PID_HES_HEY_PATHWAY	38	http://www.broadinstitute.org/gsea/msigdb/cards/PID_HES_HEY_PATHWAY	-0.26548	-0.86145	0.6479	1	1	0.342	0.221	0.267	1	0.699
c2_cp_v5	ST_B_CELL_ANTIGEN_RECEPTOR	38	http://www.broadinstitute.org/gsea/msigdb/cards/ST_B_CELL_ANTIGEN_RECEPTOR	-0.24078	-0.8601	0.6613	1	1	0.289	0.238	0.221	1	0.699
c2_cp_v5	PID_REG_GR_PATHWAY	67	http://www.broadinstitute.org/gsea/msigdb/cards/PID_REG_GR_PATHWAY	-0.22497	-0.85864	0.7168	1	1	0.254	0.209	0.202	1	0.696
c2_cp_v5	REACTOME_CD28_CO_STIMULATION	30	http://www.broadinstitute.org/gsea/msigdb/cards/REACTOME_CD28_CO_STIMULATION	-0.24453	-0.85593	0.7116	1	1	0.233	0.184	0.191	1	0.698
c2_cp_v5	REACTOME_CLASS_A1_RHODOPSIN_LIKE_RECEPTORS	128	http://www.broadinstitute.org/gsea/msigdb/cards/REACTOME_CLASS_A1_RHODOPSIN_LIKE_RECEPTORS	-0.24421	-0.85434	0.7009	1	1	0.219	0.149	0.188	1	0.697
c2_cp_v5	WNT_SIGNALING	67	http://www.broadinstitute.org/gsea/msigdb/cards/WNT_SIGNALING	-0.20515	-0.85138	0.7632	1	1	0.179	0.157	0.152	1	0.699
c2_cp_v5	BIOCARTA_EGF_PATHWAY	31	http://www.broadinstitute.org/gsea/msigdb/cards/BIOCARTA_EGF_PATHWAY	-0.25382	-0.85045	0.666	1	1	0.161	0.131	0.14	1	0.694
c2_cp_v5	KEGG_ERBB_SIGNALING_PATHWAY	76	http://www.broadinstitute.org/gsea/msigdb/cards/KEGG_ERBB_SIGNALING_PATHWAY	-0.2244	-0.84651	0.6872	1	1	0.211	0.199	0.17	1	0.706
c2_cp_v5	PID_FGF_PATHWAY	43	http://www.broadinstitute.org/gsea/msigdb/cards/PID_FGF_PATHWAY	-0.24764	-0.84498	0.7149	1	1	0.279	0.252	0.209	1	0.701
c2_cp_v5	REACTOME_REGULATION_OF_INSULIN_SECRETION_BY_GLUCAGON_LIKE_PEPTIDE1	30	http://www.broadinstitute.org/gsea/msigdb/cards/REACTOME_REGULATION_OF_INSULIN_SECRETION_BY_GLUCAGON_LIKE_PEPTIDE1	-0.2391	-0.84296	0.7252	1	1	0.1	0.0556	0.0947	1	0.703
c2_cp_v5	REACTOME_SIGNALING_BY_FGFR_IN_DISEASE	102	http://www.broadinstitute.org/gsea/msigdb/cards/REACTOME_SIGNALING_BY_FGFR_IN_DISEASE	-0.19386	-0.84291	0.7428	1	1	0.225	0.229	0.175	1	0.694
c2_cp_v5	REACTOME_INTEGRIN_CELL_SURFACE_INTERACTIONS	66	http://www.broadinstitute.org/gsea/msigdb/cards/REACTOME_INTEGRIN_CELL_SURFACE_INTERACTIONS	-0.24818	-0.84283	0.7025	1	1	0.258	0.184	0.211	1	0.682
c2_cp_v5	REACTOME_IL_3_5_AND_GM_CSF_SIGNALING	39	http://www.broadinstitute.org/gsea/msigdb/cards/REACTOME_IL_3_5_AND_GM_CSF_SIGNALING	-0.24273	-0.84221	0.7248	1	1	0.205	0.141	0.177	1	0.68
c2_cp_v5	PID_IL4_2PATHWAY	53	http://www.broadinstitute.org/gsea/msigdb/cards/PID_IL4_2PATHWAY	-0.23362	-0.84031	0.7516	1	1	0.189	0.169	0.157	1	0.679
c2_cp_v5	KEGG_MELANOMA	53	http://www.broadinstitute.org/gsea/msigdb/cards/KEGG_MELANOMA	-0.24466	-0.84011	0.6964	1	1	0.226	0.19	0.184	1	0.662
c2_cp_v5	KEGG_ENDOCYTOSIS	160	http://www.broadinstitute.org/gsea/msigdb/cards/KEGG_ENDOCYTOSIS	-0.18858	-0.83996	0.7397	1	1	0.212	0.207	0.171	1	0.656
c2_cp_v5	PID_PI3KCI_PATHWAY	48	http://www.broadinstitute.org/gsea/msigdb/cards/PID_PI3KCI_PATHWAY	-0.23704	-0.83718	0.7012	1	1	0.229	0.184	0.188	1	0.662
c2_cp_v5	REACTOME_SIGNALING_BY_TGF_BETA_RECEPTOR_COMPLEX	59	http://www.broadinstitute.org/gsea/msigdb/cards/REACTOME_SIGNALING_BY_TGF_BETA_RECEPTOR_COMPLEX	-0.21699	-0.83384	0.6806	1	1	0.22	0.218	0.173	1	0.667
c2_cp_v5	KEGG_TIGHT_JUNCTION	101	http://www.broadinstitute.org/gsea/msigdb/cards/KEGG_TIGHT_JUNCTION	-0.21073	-0.83355	0.7494	1	1	0.307	0.239	0.235	1	0.653
c2_cp_v5	PID_AVB3_INTEGRIN_PATHWAY	63	http://www.broadinstitute.org/gsea/msigdb/cards/PID_AVB3_INTEGRIN_PATHWAY	-0.24336	-0.83221	0.6612	1	1	0.27	0.207	0.215	1	0.651
c2_cp_v5	REACTOME_PI3K_EVENTS_IN_ERBB4_SIGNALING	31	http://www.broadinstitute.org/gsea/msigdb/cards/REACTOME_PI3K_EVENTS_IN_ERBB4_SIGNALING	-0.24089	-0.82206	0.7205	1	1	0.226	0.184	0.185	1	0.707
c2_cp_v5	REACTOME_MEMBRANE_TRAFFICKING	103	http://www.broadinstitute.org/gsea/msigdb/cards/REACTOME_MEMBRANE_TRAFFICKING	-0.1742	-0.82203	0.7622	1	1	0.214	0.223	0.167	1	0.696
c2_cp_v5	REACTOME_CELL_CELL_COMMUNICATION	80	http://www.broadinstitute.org/gsea/msigdb/cards/REACTOME_CELL_CELL_COMMUNICATION	-0.21831	-0.82164	0.7821	1	1	0.212	0.158	0.18	1	0.683
c2_cp_v5	KEGG_HEDGEHOG_SIGNALING_PATHWAY	35	http://www.broadinstitute.org/gsea/msigdb/cards/KEGG_HEDGEHOG_SIGNALING_PATHWAY	-0.24356	-0.8188	0.7667	1	1	0.114	0.0965	0.104	1	0.687
c2_cp_v5	PID_MYC_REPRESS_PATHWAY	57	http://www.broadinstitute.org/gsea/msigdb/cards/PID_MYC_REPRESS_PATHWAY	-0.21137	-0.81748	0.7568	1	1	0.263	0.205	0.21	1	0.686
c2_cp_v5	REACTOME_BMAL1_CLOCK_NPAS2_ACTIVATES_CIRCADIAN_EXPRESSION	32	http://www.broadinstitute.org/gsea/msigdb/cards/REACTOME_BMAL1_CLOCK_NPAS2_ACTIVATES_CIRCADIAN_EXPRESSION	-0.25499	-0.80706	0.7028	1	1	0.281	0.185	0.23	1	0.739
c2_cp_v5	BIOCARTA_AT1R_PATHWAY	31	http://www.broadinstitute.org/gsea/msigdb/cards/BIOCARTA_AT1R_PATHWAY	-0.23356	-0.80561	0.7225	1	1	0.161	0.124	0.142	1	0.734
c2_cp_v5	PID_TCPTP_PATHWAY	42	http://www.broadinstitute.org/gsea/msigdb/cards/PID_TCPTP_PATHWAY	-0.21092	-0.80013	0.8178	1	1	0.167	0.151	0.142	1	0.753
c2_cp_v5	KEGG_P53_SIGNALING_PATHWAY	64	http://www.broadinstitute.org/gsea/msigdb/cards/KEGG_P53_SIGNALING_PATHWAY	-0.22748	-0.79978	0.7688	1	1	0.422	0.324	0.287	1	0.749
c2_cp_v5	KEGG_PROSTATE_CANCER	83	http://www.broadinstitute.org/gsea/msigdb/cards/KEGG_PROSTATE_CANCER	-0.19678	-0.79934	0.775	1	1	0.217	0.204	0.174	1	0.739
c2_cp_v5	BIOCARTA_BCR_PATHWAY	34	http://www.broadinstitute.org/gsea/msigdb/cards/BIOCARTA_BCR_PATHWAY	-0.20821	-0.7979	0.7695	1	1	0.147	0.135	0.128	1	0.738
c2_cp_v5	REACTOME_LOSS_OF_NLP_FROM_MITOTIC_CENTROSOMES	56	http://www.broadinstitute.org/gsea/msigdb/cards/REACTOME_LOSS_OF_NLP_FROM_MITOTIC_CENTROSOMES	-0.22153	-0.79683	0.7088	1	1	0.321	0.255	0.241	1	0.731
c2_cp_v5	REACTOME_GPVI_MEDIATED_ACTIVATION_CASCADE	31	http://www.broadinstitute.org/gsea/msigdb/cards/REACTOME_GPVI_MEDIATED_ACTIVATION_CASCADE	-0.25706	-0.79252	0.714	1	1	0.323	0.229	0.249	1	0.74
c2_cp_v5	PID_CD40_PATHWAY	28	http://www.broadinstitute.org/gsea/msigdb/cards/PID_CD40_PATHWAY	-0.2528	-0.78927	0.7308	1	1	0.25	0.229	0.193	1	0.748
c2_cp_v5	BIOCARTA_PYK2_PATHWAY	27	http://www.broadinstitute.org/gsea/msigdb/cards/BIOCARTA_PYK2_PATHWAY	-0.2446	-0.78853	0.7344	1	1	0.185	0.123	0.163	1	0.742
c2_cp_v5	ST_P38_MAPK_PATHWAY	36	http://www.broadinstitute.org/gsea/msigdb/cards/ST_P38_MAPK_PATHWAY	-0.19737	-0.78308	0.8054	1	1	0.167	0.135	0.145	1	0.755
c2_cp_v5	REACTOME_AXON_GUIDANCE	186	http://www.broadinstitute.org/gsea/msigdb/cards/REACTOME_AXON_GUIDANCE	-0.18897	-0.78291	0.8667	1	1	0.226	0.2	0.183	1	0.747
c2_cp_v5	KEGG_AMYOTROPHIC_LATERAL_SCLEROSIS_ALS	36	http://www.broadinstitute.org/gsea/msigdb/cards/KEGG_AMYOTROPHIC_LATERAL_SCLEROSIS_ALS	-0.20246	-0.78205	0.8619	1	1	0.222	0.219	0.174	1	0.744
c2_cp_v5	BIOCARTA_GH_PATHWAY	25	http://www.broadinstitute.org/gsea/msigdb/cards/BIOCARTA_GH_PATHWAY	-0.25204	-0.77957	0.7485	1	1	0.2	0.151	0.17	1	0.744
c2_cp_v5	PID_IL12_2PATHWAY	54	http://www.broadinstitute.org/gsea/msigdb/cards/PID_IL12_2PATHWAY	-0.23402	-0.77683	0.7175	1	1	0.167	0.155	0.141	1	0.744
c2_cp_v5	PID_AMB2_NEUTROPHILS_PATHWAY	37	http://www.broadinstitute.org/gsea/msigdb/cards/PID_AMB2_NEUTROPHILS_PATHWAY	-0.23226	-0.77543	0.8206	1	1	0.324	0.245	0.245	1	0.746
c2_cp_v5	REACTOME_INTRINSIC_PATHWAY_FOR_APOPTOSIS	29	http://www.broadinstitute.org/gsea/msigdb/cards/REACTOME_INTRINSIC_PATHWAY_FOR_APOPTOSIS	-0.24783	-0.77494	0.7204	1	1	0.448	0.324	0.304	1	0.734
c2_cp_v5	PID_AP1_PATHWAY	58	http://www.broadinstitute.org/gsea/msigdb/cards/PID_AP1_PATHWAY	-0.21049	-0.77382	0.847	1	1	0.241	0.221	0.189	1	0.731
c2_cp_v5	REACTOME_PHOSPHOLIPID_METABOLISM	160	http://www.broadinstitute.org/gsea/msigdb/cards/REACTOME_PHOSPHOLIPID_METABOLISM	-0.17392	-0.77271	0.8846	1	1	0.175	0.145	0.151	1	0.727
c2_cp_v5	PID_IL8_CXCR2_PATHWAY	33	http://www.broadinstitute.org/gsea/msigdb/cards/PID_IL8_CXCR2_PATHWAY	-0.23186	-0.77204	0.7905	1	1	0.303	0.239	0.231	1	0.72
c2_cp_v5	PID_FRA_PATHWAY	35	http://www.broadinstitute.org/gsea/msigdb/cards/PID_FRA_PATHWAY	-0.24998	-0.76429	0.7896	1	1	0.429	0.318	0.293	1	0.755
c2_cp_v5	BIOCARTA_PAR1_PATHWAY	32	http://www.broadinstitute.org/gsea/msigdb/cards/BIOCARTA_PAR1_PATHWAY	-0.23137	-0.76236	0.8305	1	1	0.219	0.142	0.188	1	0.747
c2_cp_v5	REACTOME_MAPK_TARGETS_NUCLEAR_EVENTS_MEDIATED_BY_MAP_KINASES	30	http://www.broadinstitute.org/gsea/msigdb/cards/REACTOME_MAPK_TARGETS_NUCLEAR_EVENTS_MEDIATED_BY_MAP_KINASES	-0.22628	-0.75987	0.793	1	1	0.2	0.201	0.16	1	0.746
c2_cp_v5	BIOCARTA_HDAC_PATHWAY	25	http://www.broadinstitute.org/gsea/msigdb/cards/BIOCARTA_HDAC_PATHWAY	-0.26221	-0.75858	0.7228	1	1	0.24	0.173	0.199	1	0.745
c2_cp_v5	REACTOME_O_LINKED_GLYCOSYLATION_OF_MUCINS	30	http://www.broadinstitute.org/gsea/msigdb/cards/REACTOME_O_LINKED_GLYCOSYLATION_OF_MUCINS	-0.23977	-0.7561	0.8787	1	1	0.233	0.139	0.201	1	0.744
c2_cp_v5	KEGG_SMALL_CELL_LUNG_CANCER	77	http://www.broadinstitute.org/gsea/msigdb/cards/KEGG_SMALL_CELL_LUNG_CANCER	-0.19773	-0.75404	0.861	1	1	0.169	0.168	0.141	1	0.744
c2_cp_v5	ST_FAS_SIGNALING_PATHWAY	61	http://www.broadinstitute.org/gsea/msigdb/cards/ST_FAS_SIGNALING_PATHWAY	-0.16645	-0.75364	0.9023	1	1	0.23	0.236	0.176	1	0.735
c2_cp_v5	ST_PHOSPHOINOSITIDE_3_KINASE_PATHWAY	36	http://www.broadinstitute.org/gsea/msigdb/cards/ST_PHOSPHOINOSITIDE_3_KINASE_PATHWAY	-0.21969	-0.75343	0.7291	1	1	0.361	0.312	0.249	1	0.728
c2_cp_v5	PID_SYNDECAN_2_PATHWAY	28	http://www.broadinstitute.org/gsea/msigdb/cards/PID_SYNDECAN_2_PATHWAY	-0.22673	-0.75259	0.8707	1	1	0.107	0.049	0.102	1	0.724
c2_cp_v5	REACTOME_SIGNALLING_BY_NGF	190	http://www.broadinstitute.org/gsea/msigdb/cards/REACTOME_SIGNALLING_BY_NGF	-0.16316	-0.74854	0.9128	1	1	0.2	0.207	0.161	1	0.731
c2_cp_v5	PID_IL3_PATHWAY	25	http://www.broadinstitute.org/gsea/msigdb/cards/PID_IL3_PATHWAY	-0.22606	-0.74807	0.8806	1	1	0.2	0.141	0.172	1	0.721
c2_cp_v5	KEGG_PRIMARY_IMMUNODEFICIENCY	33	http://www.broadinstitute.org/gsea/msigdb/cards/KEGG_PRIMARY_IMMUNODEFICIENCY	-0.22571	-0.74608	0.8427	1	1	0.303	0.211	0.24	1	0.722
c2_cp_v5	REACTOME_ADAPTIVE_IMMUNE_SYSTEM	459	http://www.broadinstitute.org/gsea/msigdb/cards/REACTOME_ADAPTIVE_IMMUNE_SYSTEM	-0.13735	-0.74191	0.9798	1	1	0.187	0.217	0.152	1	0.729
c2_cp_v5	KEGG_INSULIN_SIGNALING_PATHWAY	116	http://www.broadinstitute.org/gsea/msigdb/cards/KEGG_INSULIN_SIGNALING_PATHWAY	-0.17322	-0.73726	0.8996	1	1	0.216	0.229	0.168	1	0.742
c2_cp_v5	KEGG_THYROID_CANCER	25	http://www.broadinstitute.org/gsea/msigdb/cards/KEGG_THYROID_CANCER	-0.20648	-0.73546	0.8904	1	1	0.28	0.256	0.209	1	0.735
c2_cp_v5	REACTOME_CELL_DEATH_SIGNALLING_VIA_NRAGE_NRIF_AND_NADE	50	http://www.broadinstitute.org/gsea/msigdb/cards/REACTOME_CELL_DEATH_SIGNALLING_VIA_NRAGE_NRIF_AND_NADE	-0.20988	-0.73449	0.8568	1	1	0.4	0.319	0.273	1	0.735
c2_cp_v5	PID_PI3KCI_AKT_PATHWAY	33	http://www.broadinstitute.org/gsea/msigdb/cards/PID_PI3KCI_AKT_PATHWAY	-0.22908	-0.73414	0.7625	1	1	0.242	0.267	0.178	1	0.731
c2_cp_v5	PID_CMYB_PATHWAY	74	http://www.broadinstitute.org/gsea/msigdb/cards/PID_CMYB_PATHWAY	-0.18519	-0.73398	0.9083	1	1	0.338	0.317	0.232	1	0.721
c2_cp_v5	PID_RET_PATHWAY	35	http://www.broadinstitute.org/gsea/msigdb/cards/PID_RET_PATHWAY	-0.20563	-0.73333	0.872	1	1	0.143	0.131	0.124	1	0.71
c2_cp_v5	PID_PDGFRB_PATHWAY	128	http://www.broadinstitute.org/gsea/msigdb/cards/PID_PDGFRB_PATHWAY	-0.17994	-0.73195	0.8357	1	1	0.0938	0.0839	0.0867	1	0.7
c2_cp_v5	KEGG_SPHINGOLIPID_METABOLISM	33	http://www.broadinstitute.org/gsea/msigdb/cards/KEGG_SPHINGOLIPID_METABOLISM	-0.23749	-0.73035	0.8135	1	1	0.182	0.117	0.161	1	0.695
c2_cp_v5	REACTOME_SIGNALING_BY_ROBO_RECEPTOR	26	http://www.broadinstitute.org/gsea/msigdb/cards/REACTOME_SIGNALING_BY_ROBO_RECEPTOR	-0.23317	-0.73021	0.8374	1	1	0.308	0.266	0.226	1	0.685
c2_cp_v5	PID_ERBB1_DOWNSTREAM_PATHWAY	102	http://www.broadinstitute.org/gsea/msigdb/cards/PID_ERBB1_DOWNSTREAM_PATHWAY	-0.16798	-0.72903	0.8664	1	1	0.118	0.131	0.103	1	0.673
c2_cp_v5	BIOCARTA_MET_PATHWAY	37	http://www.broadinstitute.org/gsea/msigdb/cards/BIOCARTA_MET_PATHWAY	-0.22166	-0.72639	0.8101	1	1	0.108	0.0714	0.101	1	0.671
c2_cp_v5	REACTOME_NOD1_2_SIGNALING_PATHWAY	28	http://www.broadinstitute.org/gsea/msigdb/cards/REACTOME_NOD1_2_SIGNALING_PATHWAY	-0.21477	-0.72581	0.8474	1	1	0.357	0.258	0.266	1	0.663
c2_cp_v5	BIOCARTA_BIOPEPTIDES_PATHWAY	37	http://www.broadinstitute.org/gsea/msigdb/cards/BIOCARTA_BIOPEPTIDES_PATHWAY	-0.20592	-0.72527	0.8633	1	1	0.135	0.116	0.12	1	0.654
c2_cp_v5	KEGG_CHRONIC_MYELOID_LEUKEMIA	69	http://www.broadinstitute.org/gsea/msigdb/cards/KEGG_CHRONIC_MYELOID_LEUKEMIA	-0.20916	-0.72514	0.7808	1	1	0.217	0.204	0.174	1	0.631
c2_cp_v5	REACTOME_PIP3_ACTIVATES_AKT_SIGNALING	26	http://www.broadinstitute.org/gsea/msigdb/cards/REACTOME_PIP3_ACTIVATES_AKT_SIGNALING	-0.2161	-0.7221	0.8208	1	1	0.269	0.255	0.201	1	0.649
c2_cp_v5	REACTOME_INTERFERON_SIGNALING	125	http://www.broadinstitute.org/gsea/msigdb/cards/REACTOME_INTERFERON_SIGNALING	-0.18304	-0.71866	0.8039	1	1	0.208	0.211	0.166	1	0.655
c2_cp_v5	PID_PS1_PATHWAY	42	http://www.broadinstitute.org/gsea/msigdb/cards/PID_PS1_PATHWAY	-0.20011	-0.71865	0.8333	1	1	0.119	0.122	0.105	1	0.637
c2_cp_v5	PID_IL1_PATHWAY	32	http://www.broadinstitute.org/gsea/msigdb/cards/PID_IL1_PATHWAY	-0.21571	-0.71387	0.7954	1	1	0.25	0.22	0.196	1	0.648
c2_cp_v5	PID_GMCSF_PATHWAY	35	http://www.broadinstitute.org/gsea/msigdb/cards/PID_GMCSF_PATHWAY	-0.20359	-0.7112	0.8614	1	1	0.2	0.184	0.164	1	0.646
c2_cp_v5	PID_TNF_PATHWAY	44	http://www.broadinstitute.org/gsea/msigdb/cards/PID_TNF_PATHWAY	-0.19615	-0.70975	0.8232	1	1	0.227	0.237	0.174	1	0.631
c2_cp_v5	REACTOME_MITOTIC_G2_G2_M_PHASES	77	http://www.broadinstitute.org/gsea/msigdb/cards/REACTOME_MITOTIC_G2_G2_M_PHASES	-0.19037	-0.70926	0.7898	1	1	0.286	0.255	0.214	1	0.623
c2_cp_v5	REACTOME_SIGNALING_BY_FGFR	88	http://www.broadinstitute.org/gsea/msigdb/cards/REACTOME_SIGNALING_BY_FGFR	-0.16237	-0.7066	0.9554	1	1	0.182	0.207	0.145	1	0.624
c2_cp_v5	PID_NETRIN_PATHWAY	28	http://www.broadinstitute.org/gsea/msigdb/cards/PID_NETRIN_PATHWAY	-0.24139	-0.70659	0.8186	1	1	0.179	0.131	0.155	1	0.604
c2_cp_v5	PID_EPHRINB_REV_PATHWAY	30	http://www.broadinstitute.org/gsea/msigdb/cards/PID_EPHRINB_REV_PATHWAY	-0.24108	-0.70292	0.9107	1	1	0.1	0.0488	0.0953	1	0.614
c2_cp_v5	REACTOME_MHC_CLASS_II_ANTIGEN_PRESENTATION	73	http://www.broadinstitute.org/gsea/msigdb/cards/REACTOME_MHC_CLASS_II_ANTIGEN_PRESENTATION	-0.15627	-0.6984	0.9127	1	1	0.192	0.217	0.151	1	0.624
c2_cp_v5	ST_JNK_MAPK_PATHWAY	37	http://www.broadinstitute.org/gsea/msigdb/cards/ST_JNK_MAPK_PATHWAY	-0.19992	-0.69208	0.8696	1	1	0.216	0.232	0.166	1	0.642
c2_cp_v5	REACTOME_ACTIVATION_OF_CHAPERONE_GENES_BY_XBP1S	41	http://www.broadinstitute.org/gsea/msigdb/cards/REACTOME_ACTIVATION_OF_CHAPERONE_GENES_BY_XBP1S	-0.2304	-0.69164	0.771	1	1	0.463	0.352	0.301	1	0.623
c2_cp_v5	REACTOME_DEVELOPMENTAL_BIOLOGY	287	http://www.broadinstitute.org/gsea/msigdb/cards/REACTOME_DEVELOPMENTAL_BIOLOGY	-0.15919	-0.6909	0.972	1	1	0.206	0.201	0.168	1	0.615
c2_cp_v5	BIOCARTA_IL2RB_PATHWAY	38	http://www.broadinstitute.org/gsea/msigdb/cards/BIOCARTA_IL2RB_PATHWAY	-0.1897	-0.68638	0.925	1	1	0.132	0.135	0.114	1	0.621
c2_cp_v5	KEGG_SYSTEMIC_LUPUS_ERYTHEMATOSUS	41	http://www.broadinstitute.org/gsea/msigdb/cards/KEGG_SYSTEMIC_LUPUS_ERYTHEMATOSUS	-0.21431	-0.68244	0.8898	1	1	0.293	0.227	0.227	1	0.628
c2_cp_v5	PID_RAC1_REG_PATHWAY	34	http://www.broadinstitute.org/gsea/msigdb/cards/PID_RAC1_REG_PATHWAY	-0.22081	-0.67436	0.864	1	1	0.206	0.147	0.176	1	0.661
c2_cp_v5	REACTOME_INTEGRIN_ALPHAIIB_BETA3_SIGNALING	26	http://www.broadinstitute.org/gsea/msigdb/cards/REACTOME_INTEGRIN_ALPHAIIB_BETA3_SIGNALING	-0.22657	-0.67276	0.9436	1	1	0.269	0.229	0.208	1	0.655
c2_cp_v5	ST_DIFFERENTIATION_PATHWAY_IN_PC12_CELLS	39	http://www.broadinstitute.org/gsea/msigdb/cards/ST_DIFFERENTIATION_PATHWAY_IN_PC12_CELLS	-0.18985	-0.66818	0.9324	1	1	0.462	0.354	0.299	1	0.665
c2_cp_v5	KEGG_B_CELL_RECEPTOR_SIGNALING_PATHWAY	73	http://www.broadinstitute.org/gsea/msigdb/cards/KEGG_B_CELL_RECEPTOR_SIGNALING_PATHWAY	-0.17616	-0.66432	0.9078	1	1	0.178	0.204	0.143	1	0.674
c2_cp_v5	BIOCARTA_G1_PATHWAY	26	http://www.broadinstitute.org/gsea/msigdb/cards/BIOCARTA_G1_PATHWAY	-0.23239	-0.66239	0.8432	1	1	0.192	0.168	0.16	1	0.67
c2_cp_v5	ST_T_CELL_SIGNAL_TRANSDUCTION	43	http://www.broadinstitute.org/gsea/msigdb/cards/ST_T_CELL_SIGNAL_TRANSDUCTION	-0.18566	-0.65871	0.9297	1	1	0.186	0.163	0.156	1	0.67
c2_cp_v5	KEGG_BASAL_CELL_CARCINOMA	40	http://www.broadinstitute.org/gsea/msigdb/cards/KEGG_BASAL_CELL_CARCINOMA	-0.18665	-0.65738	0.9736	1	1	0.375	0.309	0.26	1	0.653
c2_cp_v5	REACTOME_PI_3K_CASCADE	38	http://www.broadinstitute.org/gsea/msigdb/cards/REACTOME_PI_3K_CASCADE	-0.1829	-0.65716	0.9407	1	1	0.184	0.184	0.151	1	0.624
c2_cp_v5	PID_IL23_PATHWAY	28	http://www.broadinstitute.org/gsea/msigdb/cards/PID_IL23_PATHWAY	-0.22174	-0.6562	0.8824	1	1	0.214	0.192	0.174	1	0.603
c6_all_v5	HOXA9_DN.V1_DN	166	http://www.broadinstitute.org/gsea/msigdb/cards/HOXA9_DN.V1_DN	0.30992	1.2978	0.09416	1	0.965	0.229	0.175	0.191	1	0.945
c6_all_v5	YAP1_UP	39	http://www.broadinstitute.org/gsea/msigdb/cards/YAP1_UP	0.34443	1.1867	0.2453	1	0.998	0.487	0.292	0.346	1	0.988
c6_all_v5	TBK1.DN.48HRS_DN	49	http://www.broadinstitute.org/gsea/msigdb/cards/TBK1.DN.48HRS_DN	0.32034	1.1789	0.232	1	0.998	0.347	0.275	0.253	1	0.977
c6_all_v5	RB_DN.V1_DN	105	http://www.broadinstitute.org/gsea/msigdb/cards/RB_DN.V1_DN	0.28111	1.1654	0.1699	1	0.999	0.295	0.21	0.235	1	0.971
c6_all_v5	NFE2L2.V2	283	http://www.broadinstitute.org/gsea/msigdb/cards/NFE2L2.V2	0.26366	1.1541	0.1711	1	0.999	0.191	0.101	0.175	1	0.961
c6_all_v5	ATF2_S_UP.V1_UP	111	http://www.broadinstitute.org/gsea/msigdb/cards/ATF2_S_UP.V1_UP	0.28474	1.1301	0.2166	1	1	0.315	0.215	0.25	1	0.961
c6_all_v5	RB_P107_DN.V1_DN	113	http://www.broadinstitute.org/gsea/msigdb/cards/RB_P107_DN.V1_DN	0.27488	1.113	0.3137	1	1	0.292	0.261	0.218	1	0.965
c6_all_v5	KRAS.50_UP.V1_UP	27	http://www.broadinstitute.org/gsea/msigdb/cards/KRAS.50_UP.V1_UP	0.37885	1.0996	0.3327	1	1	0.444	0.22	0.348	1	0.954
c6_all_v5	PRC2_EZH2_UP.V1_UP	144	http://www.broadinstitute.org/gsea/msigdb/cards/PRC2_EZH2_UP.V1_UP	0.25366	1.096	0.2831	1	1	0.201	0.148	0.173	1	0.941
c6_all_v5	CAMP_UP.V1_UP	181	http://www.broadinstitute.org/gsea/msigdb/cards/CAMP_UP.V1_UP	0.23744	1.0861	0.3263	1	1	0.304	0.272	0.224	1	0.936
c6_all_v5	KRAS.300_UP.V1_UP	71	http://www.broadinstitute.org/gsea/msigdb/cards/KRAS.300_UP.V1_UP	0.29275	1.0395	0.3443	1	1	0.31	0.189	0.253	1	0.976
c6_all_v5	MYC_UP.V1_UP	145	http://www.broadinstitute.org/gsea/msigdb/cards/MYC_UP.V1_UP	0.28627	1.0386	0.3933	1	1	0.31	0.202	0.25	1	0.966
c6_all_v5	SRC_UP.V1_UP	100	http://www.broadinstitute.org/gsea/msigdb/cards/SRC_UP.V1_UP	0.25785	1.0381	0.3724	1	1	0.3	0.23	0.233	1	0.949
c6_all_v5	IL21_UP.V1_DN	86	http://www.broadinstitute.org/gsea/msigdb/cards/IL21_UP.V1_DN	0.27565	1.0245	0.3946	1	1	0.233	0.15	0.199	1	0.953
c6_all_v5	IL2_UP.V1_DN	119	http://www.broadinstitute.org/gsea/msigdb/cards/IL2_UP.V1_DN	0.26081	1.0212	0.4088	1	1	0.21	0.148	0.181	1	0.944
c6_all_v5	RB_P130_DN.V1_UP	97	http://www.broadinstitute.org/gsea/msigdb/cards/RB_P130_DN.V1_UP	0.26185	1.0158	0.42	1	1	0.402	0.276	0.293	1	0.941
c6_all_v5	RB_DN.V1_UP	119	http://www.broadinstitute.org/gsea/msigdb/cards/RB_DN.V1_UP	0.23424	1.0154	0.4249	1	1	0.412	0.302	0.29	1	0.927
c6_all_v5	KRAS.600.LUNG.BREAST_UP.V1_UP	146	http://www.broadinstitute.org/gsea/msigdb/cards/KRAS.600.LUNG.BREAST_UP.V1_UP	0.25239	1.0072	0.4096	1	1	0.267	0.188	0.219	1	0.923
c6_all_v5	MTOR_UP.N4.V1_UP	173	http://www.broadinstitute.org/gsea/msigdb/cards/MTOR_UP.N4.V1_UP	0.25552	0.99415	0.4538	1	1	0.266	0.205	0.214	1	0.934
c6_all_v5	P53_DN.V2_UP	83	http://www.broadinstitute.org/gsea/msigdb/cards/P53_DN.V2_UP	0.26457	0.97559	0.4944	1	1	0.241	0.164	0.203	1	0.958
c6_all_v5	TBK1.DN.48HRS_UP	49	http://www.broadinstitute.org/gsea/msigdb/cards/TBK1.DN.48HRS_UP	0.22218	0.965	0.5111	1	1	0.265	0.226	0.206	1	0.957
c6_all_v5	IL2_UP.V1_UP	140	http://www.broadinstitute.org/gsea/msigdb/cards/IL2_UP.V1_UP	0.24165	0.96482	0.511	1	1	0.286	0.22	0.225	1	0.942
c6_all_v5	RB_P107_DN.V1_UP	120	http://www.broadinstitute.org/gsea/msigdb/cards/RB_P107_DN.V1_UP	0.27521	0.95573	0.499	1	1	0.233	0.163	0.197	1	0.945
c6_all_v5	LEF1_UP.V1_DN	141	http://www.broadinstitute.org/gsea/msigdb/cards/LEF1_UP.V1_DN	0.24349	0.94649	0.5756	1	1	0.248	0.187	0.204	1	0.953
c6_all_v5	CSR_LATE_UP.V1_UP	139	http://www.broadinstitute.org/gsea/msigdb/cards/CSR_LATE_UP.V1_UP	0.2426	0.94589	0.5158	1	1	0.338	0.305	0.237	1	0.933
c6_all_v5	KRAS.BREAST_UP.V1_UP	71	http://www.broadinstitute.org/gsea/msigdb/cards/KRAS.BREAST_UP.V1_UP	0.25629	0.94503	0.5475	1	1	0.268	0.168	0.224	1	0.91
c6_all_v5	KRAS.PROSTATE_UP.V1_UP	82	http://www.broadinstitute.org/gsea/msigdb/cards/KRAS.PROSTATE_UP.V1_UP	0.24918	0.93357	0.61	1	1	0.293	0.183	0.241	1	0.931
c6_all_v5	BCAT_GDS748_DN	37	http://www.broadinstitute.org/gsea/msigdb/cards/BCAT_GDS748_DN	0.25732	0.9317	0.562	1	1	0.216	0.179	0.178	1	0.909
c6_all_v5	AKT_UP_MTOR_DN.V1_DN	139	http://www.broadinstitute.org/gsea/msigdb/cards/AKT_UP_MTOR_DN.V1_DN	0.21535	0.92328	0.6218	1	1	0.23	0.183	0.19	1	0.919
c6_all_v5	SNF5_DN.V1_UP	142	http://www.broadinstitute.org/gsea/msigdb/cards/SNF5_DN.V1_UP	0.22862	0.91998	0.5958	1	1	0.338	0.256	0.254	1	0.91
c6_all_v5	SRC_UP.V1_DN	120	http://www.broadinstitute.org/gsea/msigdb/cards/SRC_UP.V1_DN	0.22728	0.91218	0.5996	1	1	0.292	0.227	0.227	1	0.918
c6_all_v5	DCA_UP.V1_UP	104	http://www.broadinstitute.org/gsea/msigdb/cards/DCA_UP.V1_UP	0.22278	0.91113	0.6516	1	1	0.231	0.167	0.194	1	0.903
c6_all_v5	RPS14_DN.V1_DN	147	http://www.broadinstitute.org/gsea/msigdb/cards/RPS14_DN.V1_DN	0.23427	0.9099	0.5798	1	1	0.259	0.206	0.207	1	0.887
c6_all_v5	KRAS.DF.V1_UP	159	http://www.broadinstitute.org/gsea/msigdb/cards/KRAS.DF.V1_UP	0.22	0.90493	0.6319	1	1	0.22	0.175	0.184	1	0.884
c6_all_v5	ATF2_UP.V1_DN	139	http://www.broadinstitute.org/gsea/msigdb/cards/ATF2_UP.V1_DN	0.23879	0.9028	0.6073	1	1	0.173	0.113	0.155	1	0.867
c6_all_v5	SIRNA_EIF4GI_UP	81	http://www.broadinstitute.org/gsea/msigdb/cards/SIRNA_EIF4GI_UP	0.23436	0.8983	0.5725	1	1	0.432	0.34	0.287	1	0.855
c6_all_v5	KRAS.LUNG.BREAST_UP.V1_UP	77	http://www.broadinstitute.org/gsea/msigdb/cards/KRAS.LUNG.BREAST_UP.V1_UP	0.25636	0.88645	0.648	1	1	0.286	0.188	0.233	1	0.874
c6_all_v5	ATF2_UP.V1_UP	120	http://www.broadinstitute.org/gsea/msigdb/cards/ATF2_UP.V1_UP	0.20696	0.87841	0.7271	1	1	0.267	0.203	0.215	1	0.884
c6_all_v5	RELA_DN.V1_UP	100	http://www.broadinstitute.org/gsea/msigdb/cards/RELA_DN.V1_UP	0.22156	0.87807	0.7348	1	1	0.13	0.0815	0.12	1	0.86
c6_all_v5	ESC_J1_UP_EARLY.V1_DN	143	http://www.broadinstitute.org/gsea/msigdb/cards/ESC_J1_UP_EARLY.V1_DN	0.19649	0.87192	0.7306	1	1	0.301	0.269	0.222	1	0.86
c6_all_v5	PTEN_DN.V1_UP	95	http://www.broadinstitute.org/gsea/msigdb/cards/PTEN_DN.V1_UP	0.22578	0.87049	0.7367	1	1	0.211	0.143	0.182	1	0.838
c6_all_v5	IL15_UP.V1_UP	143	http://www.broadinstitute.org/gsea/msigdb/cards/IL15_UP.V1_UP	0.21315	0.86904	0.6893	1	1	0.119	0.0676	0.112	1	0.82
c6_all_v5	GCNP_SHH_UP_LATE.V1_UP	160	http://www.broadinstitute.org/gsea/msigdb/cards/GCNP_SHH_UP_LATE.V1_UP	0.21197	0.86727	0.5856	1	1	0.219	0.21	0.175	1	0.804
c6_all_v5	SIRNA_EIF4GI_DN	78	http://www.broadinstitute.org/gsea/msigdb/cards/SIRNA_EIF4GI_DN	0.21951	0.86632	0.6757	1	1	0.282	0.223	0.221	1	0.783
c6_all_v5	SNF5_DN.V1_DN	100	http://www.broadinstitute.org/gsea/msigdb/cards/SNF5_DN.V1_DN	0.23672	0.86368	0.7228	1	1	0.2	0.159	0.169	1	0.756
c6_all_v5	P53_DN.V1_DN	147	http://www.broadinstitute.org/gsea/msigdb/cards/P53_DN.V1_DN	0.21812	0.86288	0.7482	1	1	0.231	0.168	0.195	1	0.72
c6_all_v5	CTIP_DN.V1_UP	69	http://www.broadinstitute.org/gsea/msigdb/cards/CTIP_DN.V1_UP	0.233	0.85405	0.765	1	1	0.261	0.17	0.218	1	0.741
c6_all_v5	KRAS.DF.V1_DN	136	http://www.broadinstitute.org/gsea/msigdb/cards/KRAS.DF.V1_DN	0.19276	0.84823	0.8444	1	1	0.309	0.262	0.23	1	0.738
c6_all_v5	ERB2_UP.V1_DN	171	http://www.broadinstitute.org/gsea/msigdb/cards/ERB2_UP.V1_DN	0.22923	0.84344	0.664	1	1	0.216	0.178	0.18	1	0.726
c6_all_v5	RELA_DN.V1_DN	73	http://www.broadinstitute.org/gsea/msigdb/cards/RELA_DN.V1_DN	0.2224	0.83925	0.8188	1	1	0.205	0.164	0.173	1	0.713
c6_all_v5	IL21_UP.V1_UP	117	http://www.broadinstitute.org/gsea/msigdb/cards/IL21_UP.V1_UP	0.21949	0.83798	0.7756	1	1	0.154	0.112	0.138	1	0.676
c6_all_v5	IL15_UP.V1_DN	105	http://www.broadinstitute.org/gsea/msigdb/cards/IL15_UP.V1_DN	0.22037	0.8262	0.7895	1	1	0.19	0.134	0.166	1	0.71
c6_all_v5	P53_DN.V2_DN	92	http://www.broadinstitute.org/gsea/msigdb/cards/P53_DN.V2_DN	0.19969	0.81885	0.8877	1	1	0.141	0.104	0.127	1	0.725
c6_all_v5	MYC_UP.V1_DN	105	http://www.broadinstitute.org/gsea/msigdb/cards/MYC_UP.V1_DN	0.20206	0.81846	0.8483	1	1	0.114	0.0651	0.108	1	0.674
c6_all_v5	CRX_DN.V1_UP	86	http://www.broadinstitute.org/gsea/msigdb/cards/CRX_DN.V1_UP	0.20894	0.81691	0.8019	1	1	0.209	0.155	0.178	1	0.626
c6_all_v5	GCNP_SHH_UP_EARLY.V1_DN	129	http://www.broadinstitute.org/gsea/msigdb/cards/GCNP_SHH_UP_EARLY.V1_DN	0.19006	0.81477	0.8808	1	1	0.202	0.174	0.168	1	0.593
c6_all_v5	CORDENONSI_YAP_CONSERVED_SIGNATURE	50	http://www.broadinstitute.org/gsea/msigdb/cards/CORDENONSI_YAP_CONSERVED_SIGNATURE	0.22202	0.80069	0.8385	1	1	0.36	0.257	0.268	1	0.662
c6_all_v5	NRL_DN.V1_UP	96	http://www.broadinstitute.org/gsea/msigdb/cards/NRL_DN.V1_UP	0.19873	0.80033	0.8805	1	1	0.26	0.22	0.205	1	0.606
c6_all_v5	PRC2_EDD_UP.V1_DN	122	http://www.broadinstitute.org/gsea/msigdb/cards/PRC2_EDD_UP.V1_DN	0.19958	0.78885	0.8416	1	1	0.172	0.144	0.149	1	0.628
c6_all_v5	BCAT_GDS748_UP	35	http://www.broadinstitute.org/gsea/msigdb/cards/BCAT_GDS748_UP	0.23216	0.78349	0.8542	1	1	0.286	0.21	0.226	1	0.604
c6_all_v5	E2F1_UP.V1_UP	164	http://www.broadinstitute.org/gsea/msigdb/cards/E2F1_UP.V1_UP	0.15298	0.66626	0.9258	1	1	0.341	0.326	0.233	1	0.874
c6_all_v5	EIF4E_DN	89	http://www.broadinstitute.org/gsea/msigdb/cards/EIF4E_DN	0.16867	0.64089	0.9734	1	1	0.157	0.152	0.134	1	0.899
c6_all_v5	VEGF_A_UP.V1_DN	163	http://www.broadinstitute.org/gsea/msigdb/cards/VEGF_A_UP.V1_DN	0.16166	0.6336	0.9131	1	1	0.307	0.283	0.223	1	0.815
c6_all_v5	PIGF_UP.V1_UP	161	http://www.broadinstitute.org/gsea/msigdb/cards/PIGF_UP.V1_UP	0.13252	0.56249	0.9962	1	1	0.242	0.27	0.179	1	0.917
h_all_v5	HALLMARK_DNA_REPAIR	139	http://www.broadinstitute.org/gsea/msigdb/cards/HALLMARK_DNA_REPAIR	0.36157	1.4173	0.1118	1	0.652	0.374	0.273	0.275	1	0.565
h_all_v5	HALLMARK_MYC_TARGETS_V2	57	http://www.broadinstitute.org/gsea/msigdb/cards/HALLMARK_MYC_TARGETS_V2	0.42771	1.1776	0.3192	1	0.956	0.386	0.247	0.292	1	0.859
h_all_v5	HALLMARK_SPERMATOGENESIS	79	http://www.broadinstitute.org/gsea/msigdb/cards/HALLMARK_SPERMATOGENESIS	0.29622	1.154	0.2689	1	0.97	0.392	0.252	0.295	1	0.822
h_all_v5	HALLMARK_OXIDATIVE_PHOSPHORYLATION	185	http://www.broadinstitute.org/gsea/msigdb/cards/HALLMARK_OXIDATIVE_PHOSPHORYLATION	0.38384	1.1441	0.3775	1	0.972	0.432	0.294	0.309	1	0.733
h_all_v5	HALLMARK_XENOBIOTIC_METABOLISM	151	http://www.broadinstitute.org/gsea/msigdb/cards/HALLMARK_XENOBIOTIC_METABOLISM	0.2906	1.1405	0.2305	1	0.973	0.305	0.223	0.24	1	0.652
h_all_v5	HALLMARK_MYC_TARGETS_V1	184	http://www.broadinstitute.org/gsea/msigdb/cards/HALLMARK_MYC_TARGETS_V1	0.36046	1.1031	0.3905	1	0.986	0.538	0.391	0.332	1	0.644
h_all_v5	HALLMARK_ADIPOGENESIS	178	http://www.broadinstitute.org/gsea/msigdb/cards/HALLMARK_ADIPOGENESIS	0.27059	1.081	0.3353	1	0.99	0.365	0.276	0.268	1	0.607
h_all_v5	HALLMARK_PROTEIN_SECRETION	89	http://www.broadinstitute.org/gsea/msigdb/cards/HALLMARK_PROTEIN_SECRETION	0.23869	1.0437	0.3871	1	0.994	0.315	0.269	0.232	1	0.623
h_all_v5	HALLMARK_E2F_TARGETS	197	http://www.broadinstitute.org/gsea/msigdb/cards/HALLMARK_E2F_TARGETS	0.32894	1.0312	0.4362	1	0.997	0.335	0.249	0.255	1	0.569
h_all_v5	HALLMARK_UNFOLDED_PROTEIN_RESPONSE	108	http://www.broadinstitute.org/gsea/msigdb/cards/HALLMARK_UNFOLDED_PROTEIN_RESPONSE	0.25988	0.92792	0.5224	1	1	0.296	0.272	0.217	1	0.658
h_all_v5	HALLMARK_MTORC1_SIGNALING	188	http://www.broadinstitute.org/gsea/msigdb/cards/HALLMARK_MTORC1_SIGNALING	0.2392	0.9124	0.5403	1	1	0.41	0.354	0.269	1	0.641
h_all_v5	HALLMARK_ESTROGEN_RESPONSE_LATE	154	http://www.broadinstitute.org/gsea/msigdb/cards/HALLMARK_ESTROGEN_RESPONSE_LATE	0.22317	0.90801	0.6697	1	1	0.188	0.132	0.165	1	0.567
h_all_v5	HALLMARK_ESTROGEN_RESPONSE_EARLY	160	http://www.broadinstitute.org/gsea/msigdb/cards/HALLMARK_ESTROGEN_RESPONSE_EARLY	0.22331	0.88255	0.7074	1	1	0.156	0.119	0.139	1	0.573
h_all_v5	HALLMARK_GLYCOLYSIS	170	http://www.broadinstitute.org/gsea/msigdb/cards/HALLMARK_GLYCOLYSIS	0.21306	0.85377	0.6914	1	1	0.253	0.227	0.198	1	0.593
h_all_v5	HALLMARK_NOTCH_SIGNALING	31	http://www.broadinstitute.org/gsea/msigdb/cards/HALLMARK_NOTCH_SIGNALING	0.24117	0.83944	0.7475	1	1	0.29	0.188	0.236	1	0.552
h_all_v5	HALLMARK_APOPTOSIS	142	http://www.broadinstitute.org/gsea/msigdb/cards/HALLMARK_APOPTOSIS	-0.30404	-1.2735	0.1215	1	0.878	0.38	0.284	0.275	1	0.507
h_all_v5	HALLMARK_APICAL_JUNCTION	156	http://www.broadinstitute.org/gsea/msigdb/cards/HALLMARK_APICAL_JUNCTION	-0.29853	-1.1659	0.2058	1	0.955	0.288	0.204	0.232	1	0.653
h_all_v5	HALLMARK_EPITHELIAL_MESENCHYMAL_TRANSITION	161	http://www.broadinstitute.org/gsea/msigdb/cards/HALLMARK_EPITHELIAL_MESENCHYMAL_TRANSITION	-0.32189	-1.1325	0.2905	1	0.968	0.323	0.191	0.265	1	0.618
h_all_v5	HALLMARK_ANGIOGENESIS	31	http://www.broadinstitute.org/gsea/msigdb/cards/HALLMARK_ANGIOGENESIS	-0.37577	-1.113	0.2927	1	0.974	0.355	0.183	0.291	1	0.559
h_all_v5	HALLMARK_COMPLEMENT	164	http://www.broadinstitute.org/gsea/msigdb/cards/HALLMARK_COMPLEMENT	-0.2468	-1.0196	0.428	1	0.994	0.25	0.217	0.198	1	0.517
h_all_v5	HALLMARK_UV_RESPONSE_DN	129	http://www.broadinstitute.org/gsea/msigdb/cards/HALLMARK_UV_RESPONSE_DN	-0.22072	-0.92732	0.6374	1	1	0.202	0.164	0.17	1	0.656
h_all_v5	HALLMARK_ANDROGEN_RESPONSE	91	http://www.broadinstitute.org/gsea/msigdb/cards/HALLMARK_ANDROGEN_RESPONSE	-0.22167	-0.92289	0.5904	1	1	0.22	0.192	0.179	1	0.582
h_all_v5	HALLMARK_APICAL_SURFACE	31	http://www.broadinstitute.org/gsea/msigdb/cards/HALLMARK_APICAL_SURFACE	-0.25262	-0.83321	0.7511	1	1	0.226	0.127	0.198	1	0.758
h_all_v5	HALLMARK_INTERFERON_ALPHA_RESPONSE	93	http://www.broadinstitute.org/gsea/msigdb/cards/HALLMARK_INTERFERON_ALPHA_RESPONSE	-0.26754	-0.82153	0.6617	1	1	0.355	0.281	0.257	1	0.713
h_all_v5	HALLMARK_KRAS_SIGNALING_UP	153	http://www.broadinstitute.org/gsea/msigdb/cards/HALLMARK_KRAS_SIGNALING_UP	-0.19562	-0.80919	0.8753	1	1	0.118	0.0804	0.109	1	0.664
h_all_v5	HALLMARK_ALLOGRAFT_REJECTION	166	http://www.broadinstitute.org/gsea/msigdb/cards/HALLMARK_ALLOGRAFT_REJECTION	-0.19207	-0.75523	0.8629	1	1	0.307	0.279	0.224	1	0.785
h_all_v5	HALLMARK_REACTIVE_OXIGEN_SPECIES_PATHWAY	43	http://www.broadinstitute.org/gsea/msigdb/cards/HALLMARK_REACTIVE_OXIGEN_SPECIES_PATHWAY	-0.19747	-0.7496	0.8725	1	1	0.256	0.248	0.193	1	0.711
h_all_v5	HALLMARK_IL2_STAT5_SIGNALING	184	http://www.broadinstitute.org/gsea/msigdb/cards/HALLMARK_IL2_STAT5_SIGNALING	-0.19176	-0.74582	0.9158	1	1	0.255	0.22	0.202	1	0.57
h_all_v5	HALLMARK_HEDGEHOG_SIGNALING	30	http://www.broadinstitute.org/gsea/msigdb/cards/HALLMARK_HEDGEHOG_SIGNALING	-0.21774	-0.67715	0.9321	1	1	0.267	0.213	0.21	1	0.742
h_all_v5	HALLMARK_MITOTIC_SPINDLE	196	http://www.broadinstitute.org/gsea/msigdb/cards/HALLMARK_MITOTIC_SPINDLE	-0.16516	-0.63119	0.9191	1	1	0.301	0.288	0.218	1	0.726

## Sheet: In-Hospital_Survival
In Hospital Survival Status: Died vs Survived
Gene Set Enrichment Analysis (GSEA) Results (FDR q < 0.25):
DataBaseName	Gene Set	SIZE	SOURCE	ES	NES	NOM p-val	FDR q-val	FWER p-val	Tag %	Gene %	Signal	FDR (median)	glob.p.val
h_all_v5	HALLMARK_MYC_TARGETS_V2	57	http://www.broadinstitute.org/gsea/msigdb/cards/HALLMARK_MYC_TARGETS_V2	-0.55703	-1.5048	0.1484	0.17275	0.515	0.649	0.322	0.442	0.11396	0.004
h_all_v5	HALLMARK_COMPLEMENT	165	http://www.broadinstitute.org/gsea/msigdb/cards/HALLMARK_COMPLEMENT	-0.38261	-1.4891	0.03221	0.17443	0.553	0.327	0.202	0.264	0.11765	0.005
h_all_v5	HALLMARK_ADIPOGENESIS	178	http://www.broadinstitute.org/gsea/msigdb/cards/HALLMARK_ADIPOGENESIS	-0.38943	-1.5055	0.03401	0.19365	0.512	0.461	0.264	0.344	0.125	0.012
h_all_v5	HALLMARK_IL2_STAT5_SIGNALING	185	http://www.broadinstitute.org/gsea/msigdb/cards/HALLMARK_IL2_STAT5_SIGNALING	-0.40777	-1.5141	0.03231	0.20699	0.49	0.351	0.201	0.285	0	0.024
h_all_v5	HALLMARK_XENOBIOTIC_METABOLISM	155	http://www.broadinstitute.org/gsea/msigdb/cards/HALLMARK_XENOBIOTIC_METABOLISM	-0.37033	-1.4159	0.03151	0.21216	0.708	0.426	0.271	0.314	0.16194	0.003
h_all_v5	HALLMARK_HYPOXIA	161	http://www.broadinstitute.org/gsea/msigdb/cards/HALLMARK_HYPOXIA	-0.42509	-1.5285	0.03002	0.21548	0.463	0.342	0.171	0.287	0	0.029
h_all_v5	HALLMARK_GLYCOLYSIS	172	http://www.broadinstitute.org/gsea/msigdb/cards/HALLMARK_GLYCOLYSIS	-0.36321	-1.3851	0.06625	0.22241	0.776	0.448	0.32	0.308	0.17778	0.001
h_all_v5	HALLMARK_EPITHELIAL_MESENCHYMAL_TRANSITION	164	http://www.broadinstitute.org/gsea/msigdb/cards/HALLMARK_EPITHELIAL_MESENCHYMAL_TRANSITION	-0.45595	-1.3947	0.1096	0.22592	0.756	0.402	0.205	0.324	0.17857	0.003
h_all_v5	HALLMARK_TNFA_SIGNALING_VIA_NFKB	183	http://www.broadinstitute.org/gsea/msigdb/cards/HALLMARK_TNFA_SIGNALING_VIA_NFKB	-0.41933	-1.4167	0.07463	0.22948	0.707	0.426	0.223	0.336	0.17544	0.008
h_all_v5	HALLMARK_OXIDATIVE_PHOSPHORYLATION	185	http://www.broadinstitute.org/gsea/msigdb/cards/HALLMARK_OXIDATIVE_PHOSPHORYLATION	-0.48568	-1.3606	0.2268	0.24076	0.812	0.589	0.312	0.411	0.2	0.002
h_all_v5	HALLMARK_UV_RESPONSE_UP	124	http://www.broadinstitute.org/gsea/msigdb/cards/HALLMARK_UV_RESPONSE_UP	-0.36451	-1.4228	0.05128	0.241	0.696	0.427	0.289	0.307	0.18182	0.011
h_all_v5	HALLMARK_INFLAMMATORY_RESPONSE	166	http://www.broadinstitute.org/gsea/msigdb/cards/HALLMARK_INFLAMMATORY_RESPONSE	-0.45338	-1.5328	0.04613	0.24992	0.452	0.44	0.233	0.342	0	0.05
h_all_v5	HALLMARK_MTORC1_SIGNALING	188	http://www.broadinstitute.org/gsea/msigdb/cards/HALLMARK_MTORC1_SIGNALING	-0.35823	-1.3334	0.1945	0.26047	0.843	0.388	0.261	0.291	0.22409	0.004
h_all_v5	HALLMARK_MYC_TARGETS_V1	184	http://www.broadinstitute.org/gsea/msigdb/cards/HALLMARK_MYC_TARGETS_V1	-0.51662	-1.5487	0.1466	0.27584	0.416	0.625	0.335	0.422	0	0.073
h_all_v5	HALLMARK_FATTY_ACID_METABOLISM	131	http://www.broadinstitute.org/gsea/msigdb/cards/HALLMARK_FATTY_ACID_METABOLISM	-0.36132	-1.3028	0.1493	0.277	0.881	0.397	0.274	0.291	0.23726	0.001
h_all_v5	HALLMARK_P53_PATHWAY	173	http://www.broadinstitute.org/gsea/msigdb/cards/HALLMARK_P53_PATHWAY	-0.31416	-1.3086	0.06858	0.28439	0.874	0.353	0.262	0.264	0.24024	0.004
h_all_v5	HALLMARK_ESTROGEN_RESPONSE_LATE	155	http://www.broadinstitute.org/gsea/msigdb/cards/HALLMARK_ESTROGEN_RESPONSE_LATE	-0.32174	-1.2786	0.1046	0.29562	0.897	0.368	0.258	0.276	0.26087	0.004
h_all_v5	HALLMARK_PEROXISOME	92	http://www.broadinstitute.org/gsea/msigdb/cards/HALLMARK_PEROXISOME	-0.33279	-1.2673	0.1478	0.29635	0.91	0.413	0.272	0.303	0.27211	0.001
h_all_v5	HALLMARK_APOPTOSIS	142	http://www.broadinstitute.org/gsea/msigdb/cards/HALLMARK_APOPTOSIS	-0.30812	-1.2498	0.1214	0.30746	0.927	0.275	0.188	0.226	0.28708	0.002
h_all_v5	HALLMARK_COAGULATION	95	http://www.broadinstitute.org/gsea/msigdb/cards/HALLMARK_COAGULATION	-0.49267	-1.5715	0.0205	0.3105	0.372	0.474	0.243	0.361	0	0.11
h_all_v5	HALLMARK_ALLOGRAFT_REJECTION	167	http://www.broadinstitute.org/gsea/msigdb/cards/HALLMARK_ALLOGRAFT_REJECTION	-0.33191	-1.2282	0.2023	0.32325	0.94	0.317	0.215	0.252	0.30115	0.004
c6_all_v5	KRAS.BREAST_UP.V1_UP	72	http://www.broadinstitute.org/gsea/msigdb/cards/KRAS.BREAST_UP.V1_UP	-0.42204	-1.4649	0.02377	0.35231	0.756	0.333	0.173	0.277	0.25712	0.065
h_all_v5	HALLMARK_NOTCH_SIGNALING	31	http://www.broadinstitute.org/gsea/msigdb/cards/HALLMARK_NOTCH_SIGNALING	-0.36574	-1.1957	0.2144	0.35629	0.97	0.323	0.167	0.269	0.33333	0.002
h_all_v5	HALLMARK_ANGIOGENESIS	32	http://www.broadinstitute.org/gsea/msigdb/cards/HALLMARK_ANGIOGENESIS	-0.42117	-1.1778	0.2643	0.35724	0.976	0.406	0.23	0.313	0.33549	0.001
h_all_v5	HALLMARK_DNA_REPAIR	139	http://www.broadinstitute.org/gsea/msigdb/cards/HALLMARK_DNA_REPAIR	-0.3127	-1.1792	0.2977	0.36919	0.975	0.41	0.286	0.296	0.34783	0.002
c6_all_v5	KRAS.50_UP.V1_UP	30	http://www.broadinstitute.org/gsea/msigdb/cards/KRAS.50_UP.V1_UP	-0.49185	-1.4459	0.03158	0.37914	0.804	0.533	0.262	0.394	0.29167	0.075
c6_all_v5	IL2_UP.V1_UP	140	http://www.broadinstitute.org/gsea/msigdb/cards/IL2_UP.V1_UP	-0.38729	-1.4678	0.02258	0.38645	0.752	0.357	0.218	0.282	0.28	0.086
c6_all_v5	MYC_UP.V1_UP	149	http://www.broadinstitute.org/gsea/msigdb/cards/MYC_UP.V1_UP	-0.42356	-1.4821	0.09141	0.38694	0.716	0.517	0.301	0.365	0.28169	0.091
c6_all_v5	CYCLIN_D1_KE_.V1_UP	147	http://www.broadinstitute.org/gsea/msigdb/cards/CYCLIN_D1_KE_.V1_UP	-0.31959	-1.4198	0.03852	0.39484	0.856	0.333	0.223	0.262	0.30803	0.072
h_all_v5	HALLMARK_KRAS_SIGNALING_UP	155	http://www.broadinstitute.org/gsea/msigdb/cards/HALLMARK_KRAS_SIGNALING_UP	-0.42917	-1.5929	0.009146	0.39645	0.333	0.335	0.177	0.279	0	0.172
c6_all_v5	P53_DN.V1_DN	147	http://www.broadinstitute.org/gsea/msigdb/cards/P53_DN.V1_DN	-0.36221	-1.3817	0.01831	0.4061	0.912	0.361	0.239	0.278	0.32957	0.062
c6_all_v5	SNF5_DN.V1_UP	144	http://www.broadinstitute.org/gsea/msigdb/cards/SNF5_DN.V1_UP	-0.38665	-1.5596	0.00295	0.41009	0.508	0.382	0.256	0.287	0.29443	0.127
h_all_v5	HALLMARK_UNFOLDED_PROTEIN_RESPONSE	108	http://www.broadinstitute.org/gsea/msigdb/cards/HALLMARK_UNFOLDED_PROTEIN_RESPONSE	-0.32686	-1.1202	0.3486	0.41476	0.995	0.389	0.289	0.279	0.4	0.003
c6_all_v5	CYCLIN_D1_UP.V1_UP	132	http://www.broadinstitute.org/gsea/msigdb/cards/CYCLIN_D1_UP.V1_UP	-0.33624	-1.3836	0.03888	0.42525	0.909	0.333	0.218	0.263	0.34826	0.073
h_all_v5	HALLMARK_APICAL_JUNCTION	157	http://www.broadinstitute.org/gsea/msigdb/cards/HALLMARK_APICAL_JUNCTION	-0.29008	-1.0937	0.2889	0.42547	0.998	0.312	0.226	0.244	0.41667	0.001
h_all_v5	HALLMARK_BILE_ACID_METABOLISM	86	http://www.broadinstitute.org/gsea/msigdb/cards/HALLMARK_BILE_ACID_METABOLISM	-0.31323	-1.1218	0.275	0.42716	0.994	0.291	0.164	0.245	0.41152	0.006
c6_all_v5	KRAS.300_UP.V1_UP	74	http://www.broadinstitute.org/gsea/msigdb/cards/KRAS.300_UP.V1_UP	-0.40395	-1.4202	0.01692	0.42918	0.855	0.365	0.178	0.301	0.33493	0.089
c6_all_v5	RPS14_DN.V1_UP	162	http://www.broadinstitute.org/gsea/msigdb/cards/RPS14_DN.V1_UP	-0.40776	-1.4861	0.02711	0.43174	0.703	0.346	0.159	0.294	0.31008	0.117
h_all_v5	HALLMARK_MYOGENESIS	149	http://www.broadinstitute.org/gsea/msigdb/cards/HALLMARK_MYOGENESIS	-0.29692	-1.0989	0.2957	0.43216	0.997	0.221	0.135	0.194	0.41979	0.004
c6_all_v5	RB_P130_DN.V1_UP	96	http://www.broadinstitute.org/gsea/msigdb/cards/RB_P130_DN.V1_UP	-0.36948	-1.389	0.08416	0.43551	0.905	0.375	0.248	0.284	0.35088	0.087
c6_all_v5	KRAS.LUNG_UP.V1_UP	77	http://www.broadinstitute.org/gsea/msigdb/cards/KRAS.LUNG_UP.V1_UP	-0.44827	-1.5264	0.01302	0.43687	0.598	0.325	0.172	0.27	0.28455	0.134
c6_all_v5	KRAS.600.LUNG.BREAST_UP.V1_UP	148	http://www.broadinstitute.org/gsea/msigdb/cards/KRAS.600.LUNG.BREAST_UP.V1_UP	-0.36604	-1.3966	0.03265	0.44163	0.897	0.297	0.173	0.249	0.35213	0.088
h_all_v5	HALLMARK_PROTEIN_SECRETION	89	http://www.broadinstitute.org/gsea/msigdb/cards/HALLMARK_PROTEIN_SECRETION	-0.24598	-1.0716	0.3426	0.44691	0.999	0.303	0.262	0.225	0.44494	0.002
c6_all_v5	IL15_UP.V1_UP	143	http://www.broadinstitute.org/gsea/msigdb/cards/IL15_UP.V1_UP	-0.39084	-1.4933	0.01932	0.48381	0.686	0.329	0.188	0.27	0.32001	0.147
h_all_v5	HALLMARK_ANDROGEN_RESPONSE	89	http://www.broadinstitute.org/gsea/msigdb/cards/HALLMARK_ANDROGEN_RESPONSE	-0.26363	-1.0195	0.4093	0.49894	1	0.247	0.179	0.204	0.49383	0.001
c6_all_v5	MTOR_UP.N4.V1_UP	175	http://www.broadinstitute.org/gsea/msigdb/cards/MTOR_UP.N4.V1_UP	-0.36215	-1.3472	0.1194	0.50258	0.955	0.446	0.278	0.326	0.4103	0.102
h_all_v5	HALLMARK_ESTROGEN_RESPONSE_EARLY	163	http://www.broadinstitute.org/gsea/msigdb/cards/HALLMARK_ESTROGEN_RESPONSE_EARLY	-0.25827	-1.0233	0.4126	0.50822	1	0.337	0.258	0.253	0.5	0.002
c2_cp_v5	NABA_ECM_AFFILIATED	89	http://www.broadinstitute.org/gsea/msigdb/cards/NABA_ECM_AFFILIATED	-0.41465	-1.3706	0.07559	0.51784	0.999	0.416	0.218	0.327	0.43306	0.112
c6_all_v5	P53_DN.V2_UP	83	http://www.broadinstitute.org/gsea/msigdb/cards/P53_DN.V2_UP	-0.37815	-1.3201	0.09589	0.51996	0.975	0.349	0.202	0.281	0.44613	0.105
c2_cp_v5	REACTOME_DESTABILIZATION_OF_MRNA_BY_AUF1_HNRNP_D0	48	http://www.broadinstitute.org/gsea/msigdb/cards/REACTOME_DESTABILIZATION_OF_MRNA_BY_AUF1_HNRNP_D0	-0.49791	-1.3582	0.2189	0.52002	1	0.646	0.313	0.445	0.43186	0.11
c2_cp_v5	REACTOME_TOLL_RECEPTOR_CASCADES	107	http://www.broadinstitute.org/gsea/msigdb/cards/REACTOME_TOLL_RECEPTOR_CASCADES	-0.3024	-1.3328	0.06902	0.52009	1	0.393	0.302	0.276	0.43791	0.103
c2_cp_v5	PID_FRA_PATHWAY	35	http://www.broadinstitute.org/gsea/msigdb/cards/PID_FRA_PATHWAY	-0.48691	-1.3712	0.1104	0.5227	0.999	0.486	0.225	0.377	0.43714	0.113
c2_cp_v5	PID_ALPHA_SYNUCLEIN_PATHWAY	29	http://www.broadinstitute.org/gsea/msigdb/cards/PID_ALPHA_SYNUCLEIN_PATHWAY	-0.41458	-1.342	0.1275	0.52343	1	0.414	0.22	0.324	0.43772	0.105
c2_cp_v5	REACTOME_S_PHASE	103	http://www.broadinstitute.org/gsea/msigdb/cards/REACTOME_S_PHASE	-0.42123	-1.3548	0.2208	0.52361	1	0.544	0.328	0.368	0.43532	0.112
c2_cp_v5	KEGG_ADIPOCYTOKINE_SIGNALING_PATHWAY	54	http://www.broadinstitute.org/gsea/msigdb/cards/KEGG_ADIPOCYTOKINE_SIGNALING_PATHWAY	-0.35089	-1.3591	0.04601	0.52366	1	0.389	0.259	0.289	0.43682	0.111
c2_cp_v5	REACTOME_CELL_CYCLE_CHECKPOINTS	108	http://www.broadinstitute.org/gsea/msigdb/cards/REACTOME_CELL_CYCLE_CHECKPOINTS	-0.402	-1.3395	0.2017	0.52446	1	0.509	0.313	0.353	0.4399	0.105
c2_cp_v5	KEGG_HUNTINGTONS_DISEASE	153	http://www.broadinstitute.org/gsea/msigdb/cards/KEGG_HUNTINGTONS_DISEASE	-0.42552	-1.333	0.222	0.52481	1	0.529	0.289	0.381	0.44234	0.104
c2_cp_v5	KEGG_SYSTEMIC_LUPUS_ERYTHEMATOSUS	41	http://www.broadinstitute.org/gsea/msigdb/cards/KEGG_SYSTEMIC_LUPUS_ERYTHEMATOSUS	-0.45264	-1.3246	0.1642	0.52555	1	0.463	0.232	0.357	0.4475	0.1
c2_cp_v5	REACTOME_REGULATION_OF_ORNITHINE_DECARBOXYLASE_ODC	47	http://www.broadinstitute.org/gsea/msigdb/cards/REACTOME_REGULATION_OF_ORNITHINE_DECARBOXYLASE_ODC	-0.50933	-1.3606	0.2238	0.52598	1	0.532	0.235	0.408	0.44054	0.112
c2_cp_v5	PID_INTEGRIN1_PATHWAY	56	http://www.broadinstitute.org/gsea/msigdb/cards/PID_INTEGRIN1_PATHWAY	-0.4938	-1.3263	0.1619	0.52614	1	0.482	0.243	0.366	0.44418	0.103
c2_cp_v5	KEGG_PROTEASOME	43	http://www.broadinstitute.org/gsea/msigdb/cards/KEGG_PROTEASOME	-0.53564	-1.3345	0.2327	0.52661	1	0.674	0.313	0.465	0.44273	0.103
c2_cp_v5	REACTOME_METABOLISM_OF_RNA	173	http://www.broadinstitute.org/gsea/msigdb/cards/REACTOME_METABOLISM_OF_RNA	-0.35556	-1.3428	0.218	0.52678	1	0.364	0.239	0.281	0.4404	0.11
c2_cp_v5	KEGG_RIG_I_LIKE_RECEPTOR_SIGNALING_PATHWAY	53	http://www.broadinstitute.org/gsea/msigdb/cards/KEGG_RIG_I_LIKE_RECEPTOR_SIGNALING_PATHWAY	-0.3562	-1.3719	0.0595	0.52723	0.999	0.264	0.174	0.219	0.4404	0.117
c2_cp_v5	KEGG_PURINE_METABOLISM	125	http://www.broadinstitute.org/gsea/msigdb/cards/KEGG_PURINE_METABOLISM	-0.31576	-1.3362	0.1012	0.52749	1	0.24	0.142	0.208	0.44443	0.104
c2_cp_v5	REACTOME_RESPIRATORY_ELECTRON_TRANSPORT_ATP_SYNTHESIS_BY_CHEMIOSMOTIC_COUPLING_AND_HEAT_PRODUCTION_BY_UNCOUPLING_PROTEINS_	77	http://www.broadinstitute.org/gsea/msigdb/cards/REACTOME_RESPIRATORY_ELECTRON_TRANSPORT_ATP_SYNTHESIS_BY_CHEMIOSMOTIC_COUPLING_AND_HEAT_PRODUCTION_BY_UNCOUPLING_PROTEINS_	-0.62119	-1.3764	0.1794	0.52822	0.999	0.714	0.308	0.497	0.4398	0.114
c2_cp_v5	REACTOME_RESPIRATORY_ELECTRON_TRANSPORT	63	http://www.broadinstitute.org/gsea/msigdb/cards/REACTOME_RESPIRATORY_ELECTRON_TRANSPORT	-0.62884	-1.3737	0.182	0.52909	0.999	0.73	0.308	0.507	0.44017	0.117
c2_cp_v5	REACTOME_INNATE_IMMUNE_SYSTEM	196	http://www.broadinstitute.org/gsea/msigdb/cards/REACTOME_INNATE_IMMUNE_SYSTEM	-0.3104	-1.364	0.06281	0.52931	1	0.413	0.315	0.287	0.43969	0.116
c2_cp_v5	REACTOME_FORMATION_OF_THE_HIV1_EARLY_ELONGATION_COMPLEX	28	http://www.broadinstitute.org/gsea/msigdb/cards/REACTOME_FORMATION_OF_THE_HIV1_EARLY_ELONGATION_COMPLEX	-0.52411	-1.3616	0.206	0.52945	1	0.571	0.278	0.414	0.44307	0.112
c2_cp_v5	KEGG_ARACHIDONIC_ACID_METABOLISM	34	http://www.broadinstitute.org/gsea/msigdb/cards/KEGG_ARACHIDONIC_ACID_METABOLISM	-0.45062	-1.348	0.09431	0.53	1	0.412	0.179	0.339	0.43765	0.113
c2_cp_v5	KEGG_OXIDATIVE_PHOSPHORYLATION	103	http://www.broadinstitute.org/gsea/msigdb/cards/KEGG_OXIDATIVE_PHOSPHORYLATION	-0.54866	-1.3436	0.233	0.53031	1	0.65	0.308	0.453	0.44459	0.112
c2_cp_v5	BIOCARTA_PROTEASOME_PATHWAY	28	http://www.broadinstitute.org/gsea/msigdb/cards/BIOCARTA_PROTEASOME_PATHWAY	-0.56805	-1.3264	0.2298	0.53124	1	0.714	0.302	0.5	0.44858	0.104
c2_cp_v5	PID_AMB2_NEUTROPHILS_PATHWAY	37	http://www.broadinstitute.org/gsea/msigdb/cards/PID_AMB2_NEUTROPHILS_PATHWAY	-0.38646	-1.3082	0.1313	0.53136	1	0.351	0.208	0.279	0.45318	0.1
c6_all_v5	MEL18_DN.V1_UP	109	http://www.broadinstitute.org/gsea/msigdb/cards/MEL18_DN.V1_UP	-0.38301	-1.3238	0.1157	0.5324	0.971	0.385	0.239	0.295	0.45179	0.116
c2_cp_v5	REACTOME_SIGNALING_BY_WNT	58	http://www.broadinstitute.org/gsea/msigdb/cards/REACTOME_SIGNALING_BY_WNT	-0.44705	-1.3448	0.2329	0.53309	1	0.603	0.328	0.407	0.44515	0.113
c2_cp_v5	REACTOME_ACTIVATED_TLR4_SIGNALLING	87	http://www.broadinstitute.org/gsea/msigdb/cards/REACTOME_ACTIVATED_TLR4_SIGNALLING	-0.3208	-1.3173	0.1081	0.53347	1	0.287	0.195	0.233	0.45489	0.103
c2_cp_v5	PID_CD40_PATHWAY	28	http://www.broadinstitute.org/gsea/msigdb/cards/PID_CD40_PATHWAY	-0.42471	-1.3112	0.1474	0.53378	1	0.357	0.162	0.3	0.45841	0.1
c2_cp_v5	REACTOME_TRANSCRIPTION_COUPLED_NER_TC_NER	42	http://www.broadinstitute.org/gsea/msigdb/cards/REACTOME_TRANSCRIPTION_COUPLED_NER_TC_NER	-0.43958	-1.309	0.1972	0.53426	1	0.524	0.282	0.377	0.45678	0.101
c2_cp_v5	REACTOME_CHONDROITIN_SULFATE_DERMATAN_SULFATE_METABOLISM	34	http://www.broadinstitute.org/gsea/msigdb/cards/REACTOME_CHONDROITIN_SULFATE_DERMATAN_SULFATE_METABOLISM	-0.4481	-1.3767	0.08703	0.53428	0.999	0.412	0.225	0.32	0.44544	0.12
c2_cp_v5	REACTOME_PEPTIDE_LIGAND_BINDING_RECEPTORS	80	http://www.broadinstitute.org/gsea/msigdb/cards/REACTOME_PEPTIDE_LIGAND_BINDING_RECEPTORS	-0.4449	-1.4048	0.08087	0.53444	0.995	0.425	0.221	0.333	0.43099	0.128
c2_cp_v5	REACTOME_ASSOCIATION_OF_TRIC_CCT_WITH_TARGET_PROTEINS_DURING_BIOSYNTHESIS	26	http://www.broadinstitute.org/gsea/msigdb/cards/REACTOME_ASSOCIATION_OF_TRIC_CCT_WITH_TARGET_PROTEINS_DURING_BIOSYNTHESIS	-0.41038	-1.3484	0.148	0.53503	1	0.577	0.342	0.38	0.44251	0.117
c2_cp_v5	REACTOME_METABOLISM_OF_MRNA	128	http://www.broadinstitute.org/gsea/msigdb/cards/REACTOME_METABOLISM_OF_MRNA	-0.34087	-1.3176	0.2229	0.53798	1	0.352	0.239	0.27	0.45865	0.105
c2_cp_v5	REACTOME_MRNA_SPLICING_MINOR_PATHWAY	42	http://www.broadinstitute.org/gsea/msigdb/cards/REACTOME_MRNA_SPLICING_MINOR_PATHWAY	-0.47589	-1.3134	0.232	0.53822	1	0.595	0.28	0.43	0.45848	0.104
c2_cp_v5	PID_SYNDECAN_2_PATHWAY	29	http://www.broadinstitute.org/gsea/msigdb/cards/PID_SYNDECAN_2_PATHWAY	-0.4301	-1.3113	0.1341	0.53831	1	0.448	0.246	0.339	0.4627	0.102
c2_cp_v5	REACTOME_MRNA_CAPPING	28	http://www.broadinstitute.org/gsea/msigdb/cards/REACTOME_MRNA_CAPPING	-0.51275	-1.3772	0.185	0.54001	0.999	0.536	0.278	0.388	0.45001	0.125
c2_cp_v5	REACTOME_APC_C_CDH1_MEDIATED_DEGRADATION_OF_CDC20_AND_OTHER_APC_C_CDH1_TARGETED_PROTEINS_IN_LATE_MITOSIS_EARLY_G1	61	http://www.broadinstitute.org/gsea/msigdb/cards/REACTOME_APC_C_CDH1_MEDIATED_DEGRADATION_OF_CDC20_AND_OTHER_APC_C_CDH1_TARGETED_PROTEINS_IN_LATE_MITOSIS_EARLY_G1	-0.5125	-1.4053	0.1727	0.5411	0.995	0.475	0.235	0.365	0.43482	0.133
c2_cp_v5	REACTOME_FORMATION_OF_RNA_POL_II_ELONGATION_COMPLEX_	37	http://www.broadinstitute.org/gsea/msigdb/cards/REACTOME_FORMATION_OF_RNA_POL_II_ELONGATION_COMPLEX_	-0.47283	-1.379	0.1882	0.54149	0.999	0.324	0.114	0.288	0.4444	0.126
c2_cp_v5	REACTOME_SCF_BETA_TRCP_MEDIATED_DEGRADATION_OF_EMI1	46	http://www.broadinstitute.org/gsea/msigdb/cards/REACTOME_SCF_BETA_TRCP_MEDIATED_DEGRADATION_OF_EMI1	-0.54311	-1.3991	0.1881	0.54365	0.997	0.696	0.328	0.469	0.43785	0.133
c2_cp_v5	REACTOME_DOWNSTREAM_SIGNALING_EVENTS_OF_B_CELL_RECEPTOR_BCR	88	http://www.broadinstitute.org/gsea/msigdb/cards/REACTOME_DOWNSTREAM_SIGNALING_EVENTS_OF_B_CELL_RECEPTOR_BCR	-0.35753	-1.4124	0.1298	0.544	0.995	0.523	0.328	0.353	0.43014	0.137
c2_cp_v5	REACTOME_EXTRACELLULAR_MATRIX_ORGANIZATION	49	http://www.broadinstitute.org/gsea/msigdb/cards/REACTOME_EXTRACELLULAR_MATRIX_ORGANIZATION	-0.52245	-1.3856	0.1361	0.5442	0.999	0.551	0.23	0.426	0.4469	0.13
c2_cp_v5	KEGG_ALZHEIMERS_DISEASE	135	http://www.broadinstitute.org/gsea/msigdb/cards/KEGG_ALZHEIMERS_DISEASE	-0.43276	-1.4067	0.1778	0.54469	0.995	0.541	0.309	0.377	0.43371	0.135
c2_cp_v5	REACTOME_VIF_MEDIATED_DEGRADATION_OF_APOBEC3G	47	http://www.broadinstitute.org/gsea/msigdb/cards/REACTOME_VIF_MEDIATED_DEGRADATION_OF_APOBEC3G	-0.55983	-1.4092	0.181	0.54593	0.995	0.702	0.313	0.484	0.4325	0.136
c2_cp_v5	REACTOME_P53_INDEPENDENT_G1_S_DNA_DAMAGE_CHECKPOINT	46	http://www.broadinstitute.org/gsea/msigdb/cards/REACTOME_P53_INDEPENDENT_G1_S_DNA_DAMAGE_CHECKPOINT	-0.51177	-1.3798	0.1902	0.54598	0.999	0.543	0.235	0.417	0.44741	0.131
c2_cp_v5	REACTOME_RNA_POL_II_TRANSCRIPTION_PRE_INITIATION_AND_PROMOTER_OPENING	39	http://www.broadinstitute.org/gsea/msigdb/cards/REACTOME_RNA_POL_II_TRANSCRIPTION_PRE_INITIATION_AND_PROMOTER_OPENING	-0.46394	-1.3876	0.1661	0.54634	0.999	0.462	0.203	0.369	0.44772	0.133
c2_cp_v5	REACTOME_RNA_POL_II_PRE_TRANSCRIPTION_EVENTS	53	http://www.broadinstitute.org/gsea/msigdb/cards/REACTOME_RNA_POL_II_PRE_TRANSCRIPTION_EVENTS	-0.42199	-1.3813	0.1694	0.54899	0.999	0.396	0.203	0.317	0.45243	0.134
c2_cp_v5	PID_MYC_ACTIV_PATHWAY	75	http://www.broadinstitute.org/gsea/msigdb/cards/PID_MYC_ACTIV_PATHWAY	-0.41319	-1.3938	0.1636	0.55145	0.998	0.36	0.192	0.293	0.44606	0.138
c2_cp_v5	REACTOME_G1_S_TRANSITION	103	http://www.broadinstitute.org/gsea/msigdb/cards/REACTOME_G1_S_TRANSITION	-0.38911	-1.2924	0.2378	0.55204	1	0.485	0.328	0.329	0.48118	0.104
c2_cp_v5	KEGG_ARGININE_AND_PROLINE_METABOLISM	42	http://www.broadinstitute.org/gsea/msigdb/cards/KEGG_ARGININE_AND_PROLINE_METABOLISM	-0.46178	-1.4125	0.0821	0.55245	0.995	0.548	0.317	0.375	0.43707	0.144
c2_cp_v5	REACTOME_INFLUENZA_LIFE_CYCLE	55	http://www.broadinstitute.org/gsea/msigdb/cards/REACTOME_INFLUENZA_LIFE_CYCLE	-0.4148	-1.3881	0.1614	0.55255	0.999	0.345	0.221	0.27	0.44932	0.135
h_all_v5	HALLMARK_IL6_JAK_STAT3_SIGNALING	81	http://www.broadinstitute.org/gsea/msigdb/cards/HALLMARK_IL6_JAK_STAT3_SIGNALING	-0.49894	-1.639	0.008278	0.55488	0.254	0.432	0.195	0.35	0	0.241
c2_cp_v5	REACTOME_TRANSLATION	65	http://www.broadinstitute.org/gsea/msigdb/cards/REACTOME_TRANSLATION	-0.42099	-1.2928	0.2587	0.55586	1	0.569	0.369	0.361	0.48487	0.107
c2_cp_v5	REACTOME_DEADENYLATION_DEPENDENT_MRNA_DECAY	43	http://www.broadinstitute.org/gsea/msigdb/cards/REACTOME_DEADENYLATION_DEPENDENT_MRNA_DECAY	-0.36233	-1.2828	0.2245	0.55685	1	0.349	0.239	0.266	0.48825	0.107
c2_cp_v5	REACTOME_CDK_MEDIATED_PHOSPHORYLATION_AND_REMOVAL_OF_CDC6	44	http://www.broadinstitute.org/gsea/msigdb/cards/REACTOME_CDK_MEDIATED_PHOSPHORYLATION_AND_REMOVAL_OF_CDC6	-0.54536	-1.4139	0.1688	0.55708	0.995	0.682	0.313	0.47	0.44227	0.146
c2_cp_v5	BIOCARTA_KERATINOCYTE_PATHWAY	44	http://www.broadinstitute.org/gsea/msigdb/cards/BIOCARTA_KERATINOCYTE_PATHWAY	-0.35486	-1.288	0.1441	0.55781	1	0.409	0.302	0.287	0.48498	0.11
c2_cp_v5	KEGG_LYSOSOME	107	http://www.broadinstitute.org/gsea/msigdb/cards/KEGG_LYSOSOME	-0.37552	-1.2802	0.1753	0.55823	1	0.327	0.205	0.262	0.48966	0.105
c2_cp_v5	REACTOME_REGULATION_OF_APOPTOSIS	52	http://www.broadinstitute.org/gsea/msigdb/cards/REACTOME_REGULATION_OF_APOPTOSIS	-0.43274	-1.2766	0.2587	0.55843	1	0.5	0.235	0.384	0.49104	0.103
c6_all_v5	BMI1_DN.V1_UP	104	http://www.broadinstitute.org/gsea/msigdb/cards/BMI1_DN.V1_UP	-0.37543	-1.3247	0.06897	0.55849	0.971	0.327	0.184	0.269	0.46859	0.14
c2_cp_v5	KEGG_PYRIMIDINE_METABOLISM	88	http://www.broadinstitute.org/gsea/msigdb/cards/KEGG_PYRIMIDINE_METABOLISM	-0.35425	-1.2937	0.1753	0.55862	1	0.227	0.116	0.202	0.48476	0.11
c2_cp_v5	REACTOME_RNA_POL_I_RNA_POL_III_AND_MITOCHONDRIAL_TRANSCRIPTION	63	http://www.broadinstitute.org/gsea/msigdb/cards/REACTOME_RNA_POL_I_RNA_POL_III_AND_MITOCHONDRIAL_TRANSCRIPTION	-0.38027	-1.3884	0.1109	0.55958	0.999	0.365	0.215	0.288	0.45352	0.139
c2_cp_v5	REACTOME_SYNTHESIS_OF_DNA	87	http://www.broadinstitute.org/gsea/msigdb/cards/REACTOME_SYNTHESIS_OF_DNA	-0.43194	-1.295	0.2578	0.55979	1	0.552	0.328	0.373	0.48661	0.11
c2_cp_v5	KEGG_BLADDER_CANCER	39	http://www.broadinstitute.org/gsea/msigdb/cards/KEGG_BLADDER_CANCER	-0.37967	-1.283	0.1823	0.56107	1	0.282	0.187	0.23	0.49242	0.109
c2_cp_v5	REACTOME_P53_DEPENDENT_G1_DNA_DAMAGE_RESPONSE	51	http://www.broadinstitute.org/gsea/msigdb/cards/REACTOME_P53_DEPENDENT_G1_DNA_DAMAGE_RESPONSE	-0.41484	-1.2771	0.2656	0.56156	1	0.49	0.235	0.376	0.49411	0.106
c2_cp_v5	REACTOME_CELL_JUNCTION_ORGANIZATION	47	http://www.broadinstitute.org/gsea/msigdb/cards/REACTOME_CELL_JUNCTION_ORGANIZATION	-0.43947	-1.4141	0.02806	0.56537	0.994	0.362	0.152	0.308	0.44964	0.152
c2_cp_v5	REACTOME_M_G1_TRANSITION	75	http://www.broadinstitute.org/gsea/msigdb/cards/REACTOME_M_G1_TRANSITION	-0.42419	-1.2831	0.2635	0.56562	1	0.56	0.328	0.378	0.49667	0.112
c2_cp_v5	NABA_COLLAGENS	26	http://www.broadinstitute.org/gsea/msigdb/cards/NABA_COLLAGENS	-0.55373	-1.2623	0.2244	0.5704	1	0.615	0.303	0.43	0.50356	0.101
c2_cp_v5	NABA_SECRETED_FACTORS	160	http://www.broadinstitute.org/gsea/msigdb/cards/NABA_SECRETED_FACTORS	-0.39664	-1.4152	0.02279	0.57149	0.994	0.381	0.208	0.306	0.44562	0.157
c2_cp_v5	REACTOME_3_UTR_MEDIATED_TRANSLATIONAL_REGULATION	25	http://www.broadinstitute.org/gsea/msigdb/cards/REACTOME_3_UTR_MEDIATED_TRANSLATIONAL_REGULATION	-0.47014	-1.2632	0.2802	0.57292	1	0.56	0.302	0.392	0.50404	0.103
c2_cp_v5	REACTOME_GLOBAL_GENOMIC_NER_GG_NER	32	http://www.broadinstitute.org/gsea/msigdb/cards/REACTOME_GLOBAL_GENOMIC_NER_GG_NER	-0.42861	-1.2645	0.2491	0.57402	1	0.562	0.356	0.363	0.50528	0.104
c2_cp_v5	REACTOME_CHEMOKINE_RECEPTORS_BIND_CHEMOKINES	44	http://www.broadinstitute.org/gsea/msigdb/cards/REACTOME_CHEMOKINE_RECEPTORS_BIND_CHEMOKINES	-0.52464	-1.4202	0.1032	0.57564	0.994	0.477	0.194	0.386	0.4478	0.16
c2_cp_v5	REACTOME_MEMBRANE_TRAFFICKING	103	http://www.broadinstitute.org/gsea/msigdb/cards/REACTOME_MEMBRANE_TRAFFICKING	-0.26996	-1.2656	0.1573	0.576	1	0.34	0.267	0.251	0.50819	0.105
c2_cp_v5	REACTOME_METABOLISM_OF_CARBOHYDRATES	178	http://www.broadinstitute.org/gsea/msigdb/cards/REACTOME_METABOLISM_OF_CARBOHYDRATES	-0.30492	-1.2661	0.139	0.57941	1	0.27	0.196	0.22	0.50863	0.108
c2_cp_v5	REACTOME_AUTODEGRADATION_OF_THE_E3_UBIQUITIN_LIGASE_COP1	45	http://www.broadinstitute.org/gsea/msigdb/cards/REACTOME_AUTODEGRADATION_OF_THE_E3_UBIQUITIN_LIGASE_COP1	-0.456	-1.2564	0.302	0.58077	1	0.533	0.235	0.409	0.51441	0.107
c2_cp_v5	REACTOME_ER_PHAGOSOME_PATHWAY	50	http://www.broadinstitute.org/gsea/msigdb/cards/REACTOME_ER_PHAGOSOME_PATHWAY	-0.54456	-1.4154	0.1764	0.5808	0.994	0.66	0.313	0.455	0.4533	0.162
c2_cp_v5	KEGG_ECM_RECEPTOR_INTERACTION	68	http://www.broadinstitute.org/gsea/msigdb/cards/KEGG_ECM_RECEPTOR_INTERACTION	-0.43507	-1.2508	0.228	0.58087	1	0.397	0.222	0.31	0.52011	0.1
c2_cp_v5	REACTOME_CROSS_PRESENTATION_OF_SOLUBLE_EXOGENOUS_ANTIGENS_ENDOSOMES	45	http://www.broadinstitute.org/gsea/msigdb/cards/REACTOME_CROSS_PRESENTATION_OF_SOLUBLE_EXOGENOUS_ANTIGENS_ENDOSOMES	-0.54432	-1.4217	0.1667	0.58095	0.994	0.667	0.313	0.459	0.4493	0.162
c2_cp_v5	REACTOME_ADAPTIVE_IMMUNE_SYSTEM	460	http://www.broadinstitute.org/gsea/msigdb/cards/REACTOME_ADAPTIVE_IMMUNE_SYSTEM	-0.24636	-1.2435	0.1316	0.58149	1	0.289	0.258	0.222	0.5213	0.1
c2_cp_v5	REACTOME_METABOLISM_OF_AMINO_ACIDS_AND_DERIVATIVES	145	http://www.broadinstitute.org/gsea/msigdb/cards/REACTOME_METABOLISM_OF_AMINO_ACIDS_AND_DERIVATIVES	-0.34826	-1.2524	0.2039	0.58163	1	0.414	0.259	0.31	0.52054	0.103
c2_cp_v5	PID_TNF_PATHWAY	44	http://www.broadinstitute.org/gsea/msigdb/cards/PID_TNF_PATHWAY	-0.35032	-1.247	0.1882	0.58171	1	0.341	0.227	0.264	0.52068	0.1
c2_cp_v5	KEGG_CELL_ADHESION_MOLECULES_CAMS	84	http://www.broadinstitute.org/gsea/msigdb/cards/KEGG_CELL_ADHESION_MOLECULES_CAMS	-0.39659	-1.254	0.1893	0.58238	1	0.369	0.202	0.297	0.51666	0.103
c2_cp_v5	REACTOME_CLASS_A1_RHODOPSIN_LIKE_RECEPTORS	131	http://www.broadinstitute.org/gsea/msigdb/cards/REACTOME_CLASS_A1_RHODOPSIN_LIKE_RECEPTORS	-0.36719	-1.2482	0.1751	0.58284	1	0.382	0.235	0.295	0.52214	0.103
c2_cp_v5	REACTOME_METABOLISM_OF_PROTEINS	299	http://www.broadinstitute.org/gsea/msigdb/cards/REACTOME_METABOLISM_OF_PROTEINS	-0.34651	-1.2443	0.237	0.58386	1	0.502	0.344	0.337	0.52432	0.102
c2_cp_v5	REACTOME_TRANSCRIPTION	143	http://www.broadinstitute.org/gsea/msigdb/cards/REACTOME_TRANSCRIPTION	-0.33379	-1.424	0.1271	0.58388	0.994	0.308	0.207	0.247	0.45184	0.165
c2_cp_v5	KEGG_FRUCTOSE_AND_MANNOSE_METABOLISM	31	http://www.broadinstitute.org/gsea/msigdb/cards/KEGG_FRUCTOSE_AND_MANNOSE_METABOLISM	-0.47622	-1.4263	0.06294	0.5863	0.994	0.323	0.128	0.282	0.45017	0.166
c2_cp_v5	REACTOME_ASSEMBLY_OF_THE_PRE_REPLICATIVE_COMPLEX	60	http://www.broadinstitute.org/gsea/msigdb/cards/REACTOME_ASSEMBLY_OF_THE_PRE_REPLICATIVE_COMPLEX	-0.48996	-1.4296	0.1556	0.58668	0.994	0.617	0.313	0.425	0.45279	0.161
c2_cp_v5	PID_SYNDECAN_4_PATHWAY	29	http://www.broadinstitute.org/gsea/msigdb/cards/PID_SYNDECAN_4_PATHWAY	-0.47287	-1.4314	0.065	0.59146	0.994	0.414	0.199	0.332	0.45444	0.163
c6_all_v5	TBK1.DN.48HRS_DN	49	http://www.broadinstitute.org/gsea/msigdb/cards/TBK1.DN.48HRS_DN	-0.43992	-1.563	0.01155	0.59448	0.496	0.367	0.196	0.297	0	0.219
c2_cp_v5	REACTOME_PERK_REGULATED_GENE_EXPRESSION	25	http://www.broadinstitute.org/gsea/msigdb/cards/REACTOME_PERK_REGULATED_GENE_EXPRESSION	-0.486	-1.4333	0.1077	0.59634	0.994	0.52	0.191	0.421	0.45722	0.165
c2_cp_v5	KEGG_GLYCOLYSIS_GLUCONEOGENESIS	45	http://www.broadinstitute.org/gsea/msigdb/cards/KEGG_GLYCOLYSIS_GLUCONEOGENESIS	-0.38535	-1.2295	0.204	0.59942	1	0.333	0.167	0.279	0.53957	0.105
c2_cp_v5	REACTOME_INTEGRIN_CELL_SURFACE_INTERACTIONS	67	http://www.broadinstitute.org/gsea/msigdb/cards/REACTOME_INTEGRIN_CELL_SURFACE_INTERACTIONS	-0.39174	-1.2338	0.221	0.60183	1	0.373	0.248	0.282	0.54108	0.107
c6_all_v5	SNF5_DN.V1_DN	101	http://www.broadinstitute.org/gsea/msigdb/cards/SNF5_DN.V1_DN	-0.36672	-1.257	0.1498	0.60188	0.992	0.327	0.212	0.259	0.5414	0.124
c2_cp_v5	REACTOME_GLUCOSE_TRANSPORT	32	http://www.broadinstitute.org/gsea/msigdb/cards/REACTOME_GLUCOSE_TRANSPORT	-0.38716	-1.2247	0.2485	0.60263	1	0.312	0.252	0.234	0.54478	0.104
c6_all_v5	KRAS.AMP.LUNG_UP.V1_UP	59	http://www.broadinstitute.org/gsea/msigdb/cards/KRAS.AMP.LUNG_UP.V1_UP	-0.34559	-1.2514	0.135	0.6028	0.993	0.339	0.218	0.266	0.54306	0.131
c2_cp_v5	REACTOME_METABOLISM_OF_NON_CODING_RNA	48	http://www.broadinstitute.org/gsea/msigdb/cards/REACTOME_METABOLISM_OF_NON_CODING_RNA	-0.3952	-1.2263	0.3182	0.60286	1	0.375	0.221	0.293	0.54487	0.105
c2_cp_v5	REACTOME_NUCLEOTIDE_EXCISION_REPAIR	47	http://www.broadinstitute.org/gsea/msigdb/cards/REACTOME_NUCLEOTIDE_EXCISION_REPAIR	-0.40633	-1.2296	0.2669	0.60354	1	0.596	0.356	0.385	0.54351	0.108
c2_cp_v5	REACTOME_CDT1_ASSOCIATION_WITH_THE_CDC6_ORC_ORIGIN_COMPLEX	52	http://www.broadinstitute.org/gsea/msigdb/cards/REACTOME_CDT1_ASSOCIATION_WITH_THE_CDC6_ORC_ORIGIN_COMPLEX	-0.51099	-1.4345	0.1572	0.60384	0.994	0.654	0.313	0.451	0.46515	0.169
c2_cp_v5	REACTOME_PYRUVATE_METABOLISM_AND_CITRIC_ACID_TCA_CYCLE	37	http://www.broadinstitute.org/gsea/msigdb/cards/REACTOME_PYRUVATE_METABOLISM_AND_CITRIC_ACID_TCA_CYCLE	-0.37722	-1.2306	0.2578	0.60538	1	0.432	0.312	0.299	0.54679	0.107
c2_cp_v5	REACTOME_SRP_DEPENDENT_COTRANSLATIONAL_PROTEIN_TARGETING_TO_MEMBRANE	28	http://www.broadinstitute.org/gsea/msigdb/cards/REACTOME_SRP_DEPENDENT_COTRANSLATIONAL_PROTEIN_TARGETING_TO_MEMBRANE	-0.50407	-1.2183	0.2915	0.60579	1	0.429	0.233	0.329	0.54988	0.1
c2_cp_v5	REACTOME_FORMATION_OF_TRANSCRIPTION_COUPLED_NER_TC_NER_REPAIR_COMPLEX	27	http://www.broadinstitute.org/gsea/msigdb/cards/REACTOME_FORMATION_OF_TRANSCRIPTION_COUPLED_NER_TC_NER_REPAIR_COMPLEX	-0.43782	-1.2199	0.2944	0.60598	1	0.556	0.282	0.4	0.55152	0.103
c2_cp_v5	REACTOME_LIPOPROTEIN_METABOLISM	25	http://www.broadinstitute.org/gsea/msigdb/cards/REACTOME_LIPOPROTEIN_METABOLISM	-0.47929	-1.2096	0.2399	0.60634	1	0.6	0.321	0.408	0.55499	0.097
c2_cp_v5	REACTOME_TRIGLYCERIDE_BIOSYNTHESIS	33	http://www.broadinstitute.org/gsea/msigdb/cards/REACTOME_TRIGLYCERIDE_BIOSYNTHESIS	-0.38478	-1.2214	0.1861	0.60668	1	0.424	0.268	0.311	0.5528	0.104
c2_cp_v5	REACTOME_PHASE1_FUNCTIONALIZATION_OF_COMPOUNDS	30	http://www.broadinstitute.org/gsea/msigdb/cards/REACTOME_PHASE1_FUNCTIONALIZATION_OF_COMPOUNDS	-0.39935	-1.2162	0.159	0.60669	1	0.4	0.202	0.32	0.55279	0.097
c2_cp_v5	REACTOME_INTERFERON_GAMMA_SIGNALING	46	http://www.broadinstitute.org/gsea/msigdb/cards/REACTOME_INTERFERON_GAMMA_SIGNALING	-0.40181	-1.206	0.2522	0.60684	1	0.196	0.0738	0.182	0.55731	0.095
c2_cp_v5	REACTOME_MYD88_MAL_CASCADE_INITIATED_ON_PLASMA_MEMBRANE	77	http://www.broadinstitute.org/gsea/msigdb/cards/REACTOME_MYD88_MAL_CASCADE_INITIATED_ON_PLASMA_MEMBRANE	-0.29558	-1.2072	0.2014	0.60815	1	0.312	0.233	0.24	0.55589	0.096
c2_cp_v5	KEGG_CARDIAC_MUSCLE_CONTRACTION	48	http://www.broadinstitute.org/gsea/msigdb/cards/KEGG_CARDIAC_MUSCLE_CONTRACTION	-0.47647	-1.4367	0.09949	0.60855	0.994	0.479	0.212	0.379	0.46862	0.169
c2_cp_v5	REACTOME_COLLAGEN_FORMATION	37	http://www.broadinstitute.org/gsea/msigdb/cards/REACTOME_COLLAGEN_FORMATION	-0.4839	-1.2103	0.2699	0.60862	1	0.541	0.25	0.407	0.55476	0.099
c2_cp_v5	KEGG_BASAL_TRANSCRIPTION_FACTORS	30	http://www.broadinstitute.org/gsea/msigdb/cards/KEGG_BASAL_TRANSCRIPTION_FACTORS	-0.4087	-1.44	0.09059	0.60928	0.994	0.4	0.206	0.318	0.46128	0.169
c2_cp_v5	PID_UPA_UPAR_PATHWAY	36	http://www.broadinstitute.org/gsea/msigdb/cards/PID_UPA_UPAR_PATHWAY	-0.46707	-1.2115	0.2613	0.60975	1	0.5	0.243	0.379	0.5549	0.097
c6_all_v5	KRAS.DF.V1_UP	160	http://www.broadinstitute.org/gsea/msigdb/cards/KRAS.DF.V1_UP	-0.30168	-1.2439	0.0981	0.6107	0.995	0.25	0.17	0.21	0.54904	0.125
c2_cp_v5	REACTOME_APOPTOSIS	129	http://www.broadinstitute.org/gsea/msigdb/cards/REACTOME_APOPTOSIS	-0.28661	-1.2122	0.2076	0.61218	1	0.326	0.215	0.258	0.55809	0.102
c2_cp_v5	REACTOME_GLYCEROPHOSPHOLIPID_BIOSYNTHESIS	66	http://www.broadinstitute.org/gsea/msigdb/cards/REACTOME_GLYCEROPHOSPHOLIPID_BIOSYNTHESIS	-0.39845	-1.4426	0.05197	0.61384	0.993	0.303	0.157	0.257	0.46273	0.172
c6_all_v5	ALK_DN.V1_UP	82	http://www.broadinstitute.org/gsea/msigdb/cards/ALK_DN.V1_UP	-0.36035	-1.2588	0.1429	0.61735	0.991	0.463	0.258	0.346	0.55227	0.143
c2_cp_v5	REACTOME_TRANSPORT_OF_GLUCOSE_AND_OTHER_SUGARS_BILE_SALTS_AND_ORGANIC_ACIDS_METAL_IONS_AND_AMINE_COMPOUNDS	42	http://www.broadinstitute.org/gsea/msigdb/cards/REACTOME_TRANSPORT_OF_GLUCOSE_AND_OTHER_SUGARS_BILE_SALTS_AND_ORGANIC_ACIDS_METAL_IONS_AND_AMINE_COMPOUNDS	-0.38102	-1.1986	0.2146	0.62056	1	0.381	0.208	0.303	0.57164	0.102
c2_cp_v5	REACTOME_RNA_POL_II_TRANSCRIPTION	95	http://www.broadinstitute.org/gsea/msigdb/cards/REACTOME_RNA_POL_II_TRANSCRIPTION	-0.36512	-1.4513	0.1131	0.62218	0.992	0.368	0.252	0.278	0.46872	0.179
c2_cp_v5	REACTOME_ELONGATION_ARREST_AND_RECOVERY	26	http://www.broadinstitute.org/gsea/msigdb/cards/REACTOME_ELONGATION_ARREST_AND_RECOVERY	-0.50604	-1.4435	0.1538	0.62349	0.993	0.385	0.114	0.341	0.46792	0.177
c6_all_v5	AKT_UP_MTOR_DN.V1_DN	141	http://www.broadinstitute.org/gsea/msigdb/cards/AKT_UP_MTOR_DN.V1_DN	-0.31121	-1.2632	0.07569	0.62372	0.99	0.362	0.27	0.267	0.55573	0.142
c6_all_v5	ESC_V6.5_UP_EARLY.V1_DN	130	http://www.broadinstitute.org/gsea/msigdb/cards/ESC_V6.5_UP_EARLY.V1_DN	-0.37061	-1.2877	0.1342	0.62413	0.984	0.354	0.217	0.28	0.55556	0.168
c2_cp_v5	REACTOME_ORC1_REMOVAL_FROM_CHROMATIN	62	http://www.broadinstitute.org/gsea/msigdb/cards/REACTOME_ORC1_REMOVAL_FROM_CHROMATIN	-0.4758	-1.4696	0.1283	0.62478	0.989	0.581	0.313	0.401	0.44887	0.177
c2_cp_v5	NABA_ECM_REGULATORS	123	http://www.broadinstitute.org/gsea/msigdb/cards/NABA_ECM_REGULATORS	-0.43224	-1.4656	0.04024	0.62527	0.989	0.415	0.228	0.323	0.45741	0.176
c2_cp_v5	REACTOME_SCFSKP2_MEDIATED_DEGRADATION_OF_P27_P21	50	http://www.broadinstitute.org/gsea/msigdb/cards/REACTOME_SCFSKP2_MEDIATED_DEGRADATION_OF_P27_P21	-0.51916	-1.4571	0.1171	0.62835	0.991	0.64	0.328	0.432	0.46348	0.179
c6_all_v5	RB_P107_DN.V1_DN	113	http://www.broadinstitute.org/gsea/msigdb/cards/RB_P107_DN.V1_DN	-0.32284	-1.2735	0.1146	0.62993	0.988	0.451	0.301	0.318	0.55982	0.164
c2_cp_v5	REACTOME_REGULATION_OF_MRNA_STABILITY_BY_PROTEINS_THAT_BIND_AU_RICH_ELEMENTS	79	http://www.broadinstitute.org/gsea/msigdb/cards/REACTOME_REGULATION_OF_MRNA_STABILITY_BY_PROTEINS_THAT_BIND_AU_RICH_ELEMENTS	-0.42826	-1.4454	0.1667	0.62995	0.993	0.443	0.235	0.341	0.4749	0.18
c2_cp_v5	REACTOME_MITOTIC_G1_G1_S_PHASES	125	http://www.broadinstitute.org/gsea/msigdb/cards/REACTOME_MITOTIC_G1_G1_S_PHASES	-0.33416	-1.1894	0.292	0.63123	1	0.44	0.328	0.298	0.58177	0.102
c2_cp_v5	REACTOME_CLEAVAGE_OF_GROWING_TRANSCRIPT_IN_THE_TERMINATION_REGION_	42	http://www.broadinstitute.org/gsea/msigdb/cards/REACTOME_CLEAVAGE_OF_GROWING_TRANSCRIPT_IN_THE_TERMINATION_REGION_	-0.28912	-1.1924	0.2731	0.63184	1	0.286	0.245	0.216	0.58183	0.106
c2_cp_v5	REACTOME_GPCR_LIGAND_BINDING	187	http://www.broadinstitute.org/gsea/msigdb/cards/REACTOME_GPCR_LIGAND_BINDING	-0.32755	-1.1873	0.2116	0.63253	1	0.358	0.235	0.278	0.58712	0.101
c2_cp_v5	REACTOME_GLYCOSAMINOGLYCAN_METABOLISM	78	http://www.broadinstitute.org/gsea/msigdb/cards/REACTOME_GLYCOSAMINOGLYCAN_METABOLISM	-0.34818	-1.1895	0.2206	0.63491	1	0.372	0.258	0.277	0.58557	0.108
c2_cp_v5	REACTOME_REGULATION_OF_MITOTIC_CELL_CYCLE	72	http://www.broadinstitute.org/gsea/msigdb/cards/REACTOME_REGULATION_OF_MITOTIC_CELL_CYCLE	-0.50771	-1.4514	0.1352	0.63624	0.992	0.444	0.235	0.342	0.47962	0.184
c2_cp_v5	KEGG_HEMATOPOIETIC_CELL_LINEAGE	65	http://www.broadinstitute.org/gsea/msigdb/cards/KEGG_HEMATOPOIETIC_CELL_LINEAGE	-0.48556	-1.4698	0.03853	0.6407	0.989	0.277	0.121	0.245	0.46069	0.183
c2_cp_v5	REACTOME_APC_C_CDC20_MEDIATED_DEGRADATION_OF_MITOTIC_PROTEINS	62	http://www.broadinstitute.org/gsea/msigdb/cards/REACTOME_APC_C_CDC20_MEDIATED_DEGRADATION_OF_MITOTIC_PROTEINS	-0.53887	-1.4572	0.1372	0.64337	0.991	0.5	0.235	0.384	0.47479	0.184
c6_all_v5	ATM_DN.V1_UP	79	http://www.broadinstitute.org/gsea/msigdb/cards/ATM_DN.V1_UP	-0.34262	-1.2639	0.09813	0.64614	0.99	0.329	0.199	0.265	0.57241	0.173
c6_all_v5	SIRNA_EIF4GI_DN	78	http://www.broadinstitute.org/gsea/msigdb/cards/SIRNA_EIF4GI_DN	-0.3375	-1.2753	0.1567	0.65086	0.987	0.41	0.29	0.293	0.57851	0.182
c2_cp_v5	SIG_CD40PATHWAYMAP	33	http://www.broadinstitute.org/gsea/msigdb/cards/SIG_CD40PATHWAYMAP	-0.36631	-1.4707	0.02439	0.65369	0.989	0.303	0.162	0.254	0.47065	0.191
c2_cp_v5	REACTOME_HEPARAN_SULFATE_HEPARIN_HS_GAG_METABOLISM	34	http://www.broadinstitute.org/gsea/msigdb/cards/REACTOME_HEPARAN_SULFATE_HEPARIN_HS_GAG_METABOLISM	-0.4074	-1.1758	0.2565	0.65713	1	0.294	0.147	0.252	0.61197	0.124
c2_cp_v5	REACTOME_TRNA_AMINOACYLATION	41	http://www.broadinstitute.org/gsea/msigdb/cards/REACTOME_TRNA_AMINOACYLATION	-0.43518	-1.1713	0.3454	0.66429	1	0.439	0.316	0.301	0.62139	0.127
c2_cp_v5	REACTOME_CELL_CELL_JUNCTION_ORGANIZATION	29	http://www.broadinstitute.org/gsea/msigdb/cards/REACTOME_CELL_CELL_JUNCTION_ORGANIZATION	-0.40353	-1.1685	0.2311	0.66758	1	0.345	0.152	0.293	0.62706	0.131
c2_cp_v5	PID_NECTIN_PATHWAY	29	http://www.broadinstitute.org/gsea/msigdb/cards/PID_NECTIN_PATHWAY	-0.38846	-1.1664	0.2733	0.66867	1	0.207	0.0585	0.195	0.62922	0.128
c2_cp_v5	REACTOME_HOST_INTERACTIONS_OF_HIV_FACTORS	116	http://www.broadinstitute.org/gsea/msigdb/cards/REACTOME_HOST_INTERACTIONS_OF_HIV_FACTORS	-0.40764	-1.4709	0.1391	0.67142	0.989	0.491	0.313	0.34	0.48372	0.197
c2_cp_v5	REACTOME_G_ALPHA_I_SIGNALLING_EVENTS	111	http://www.broadinstitute.org/gsea/msigdb/cards/REACTOME_G_ALPHA_I_SIGNALLING_EVENTS	-0.31382	-1.1584	0.2443	0.67145	1	0.369	0.246	0.281	0.63604	0.127
c2_cp_v5	KEGG_GLUTATHIONE_METABOLISM	40	http://www.broadinstitute.org/gsea/msigdb/cards/KEGG_GLUTATHIONE_METABOLISM	-0.37578	-1.1598	0.273	0.67214	1	0.2	0.0942	0.182	0.63489	0.13
c2_cp_v5	REACTOME_BIOSYNTHESIS_OF_THE_N_GLYCAN_PRECURSOR_DOLICHOL_LIPID_LINKED_OLIGOSACCHARIDE_LLO_AND_TRANSFER_TO_A_NASCENT_PROTEIN	28	http://www.broadinstitute.org/gsea/msigdb/cards/REACTOME_BIOSYNTHESIS_OF_THE_N_GLYCAN_PRECURSOR_DOLICHOL_LIPID_LINKED_OLIGOSACCHARIDE_LLO_AND_TRANSFER_TO_A_NASCENT_PROTEIN	-0.42451	-1.1604	0.3529	0.67466	1	0.571	0.344	0.376	0.63784	0.13
c2_cp_v5	REACTOME_TRANS_GOLGI_NETWORK_VESICLE_BUDDING	54	http://www.broadinstitute.org/gsea/msigdb/cards/REACTOME_TRANS_GOLGI_NETWORK_VESICLE_BUDDING	-0.27492	-1.1608	0.2513	0.67821	1	0.37	0.267	0.273	0.63818	0.134
h_all_v5	HALLMARK_INTERFERON_GAMMA_RESPONSE	188	http://www.broadinstitute.org/gsea/msigdb/cards/HALLMARK_INTERFERON_GAMMA_RESPONSE	-0.27635	-0.90485	0.5579	0.6809	1	0.261	0.197	0.212	0.68796	0.014
c2_cp_v5	REACTOME_IL1_SIGNALING	35	http://www.broadinstitute.org/gsea/msigdb/cards/REACTOME_IL1_SIGNALING	-0.35708	-1.1471	0.3095	0.68281	1	0.343	0.195	0.277	0.65131	0.13
c2_cp_v5	KEGG_GLYCEROPHOSPHOLIPID_METABOLISM	59	http://www.broadinstitute.org/gsea/msigdb/cards/KEGG_GLYCEROPHOSPHOLIPID_METABOLISM	-0.32111	-1.1504	0.2607	0.68288	1	0.237	0.143	0.204	0.65071	0.131
c2_cp_v5	REACTOME_L1CAM_INTERACTIONS	64	http://www.broadinstitute.org/gsea/msigdb/cards/REACTOME_L1CAM_INTERACTIONS	-0.30183	-1.1519	0.2472	0.68319	1	0.172	0.0983	0.156	0.64777	0.131
h_all_v5	HALLMARK_MITOTIC_SPINDLE	196	http://www.broadinstitute.org/gsea/msigdb/cards/HALLMARK_MITOTIC_SPINDLE	0.35354	1.3879	0.1144	0.68394	0.641	0.413	0.267	0.307	0.53333	0.298
c2_cp_v5	PID_IL8_CXCR2_PATHWAY	33	http://www.broadinstitute.org/gsea/msigdb/cards/PID_IL8_CXCR2_PATHWAY	-0.33421	-1.1475	0.2968	0.68591	1	0.182	0.0915	0.166	0.652	0.133
c6_all_v5	CAMP_UP.V1_UP	181	http://www.broadinstitute.org/gsea/msigdb/cards/CAMP_UP.V1_UP	-0.25637	-1.1701	0.2486	0.68806	1	0.403	0.327	0.275	0.6422	0.148
c2_cp_v5	REACTOME_AUTODEGRADATION_OF_CDH1_BY_CDH1_APC_C	53	http://www.broadinstitute.org/gsea/msigdb/cards/REACTOME_AUTODEGRADATION_OF_CDH1_BY_CDH1_APC_C	-0.56069	-1.471	0.1252	0.68989	0.989	0.528	0.235	0.406	0.49754	0.208
c2_cp_v5	PID_MYC_REPRESS_PATHWAY	57	http://www.broadinstitute.org/gsea/msigdb/cards/PID_MYC_REPRESS_PATHWAY	-0.29602	-1.1353	0.2888	0.70019	1	0.211	0.137	0.183	0.67268	0.138
c2_cp_v5	KEGG_CYSTEINE_AND_METHIONINE_METABOLISM	29	http://www.broadinstitute.org/gsea/msigdb/cards/KEGG_CYSTEINE_AND_METHIONINE_METABOLISM	-0.3709	-1.1285	0.3258	0.70103	1	0.276	0.139	0.238	0.6771	0.133
c6_all_v5	BCAT_BILD_ET_AL_UP	37	http://www.broadinstitute.org/gsea/msigdb/cards/BCAT_BILD_ET_AL_UP	-0.34806	-1.1713	0.2479	0.7018	1	0.324	0.204	0.259	0.65268	0.173
c2_cp_v5	KEGG_SELENOAMINO_ACID_METABOLISM	26	http://www.broadinstitute.org/gsea/msigdb/cards/KEGG_SELENOAMINO_ACID_METABOLISM	-0.34382	-1.1363	0.2958	0.70187	1	0.577	0.341	0.381	0.67477	0.142
c2_cp_v5	KEGG_TOLL_LIKE_RECEPTOR_SIGNALING_PATHWAY	83	http://www.broadinstitute.org/gsea/msigdb/cards/KEGG_TOLL_LIKE_RECEPTOR_SIGNALING_PATHWAY	-0.2842	-1.1297	0.2685	0.70196	1	0.289	0.218	0.228	0.67829	0.137
c2_cp_v5	REACTOME_EXTENSION_OF_TELOMERES	27	http://www.broadinstitute.org/gsea/msigdb/cards/REACTOME_EXTENSION_OF_TELOMERES	-0.45445	-1.1228	0.372	0.7029	1	0.593	0.358	0.381	0.67893	0.134
c2_cp_v5	REACTOME_RNA_POL_I_TRANSCRIPTION	30	http://www.broadinstitute.org/gsea/msigdb/cards/REACTOME_RNA_POL_I_TRANSCRIPTION	-0.35016	-1.1257	0.3574	0.70379	1	0.367	0.243	0.278	0.67853	0.137
c2_cp_v5	BIOCARTA_IL1R_PATHWAY	25	http://www.broadinstitute.org/gsea/msigdb/cards/BIOCARTA_IL1R_PATHWAY	-0.38929	-1.1322	0.3309	0.70401	1	0.32	0.226	0.248	0.67693	0.141
c2_cp_v5	PID_PTP1B_PATHWAY	46	http://www.broadinstitute.org/gsea/msigdb/cards/PID_PTP1B_PATHWAY	-0.3165	-1.1239	0.2936	0.70421	1	0.152	0.0576	0.144	0.67984	0.135
c2_cp_v5	PID_HIF2PATHWAY	28	http://www.broadinstitute.org/gsea/msigdb/cards/PID_HIF2PATHWAY	-0.46741	-1.4721	0.07092	0.70422	0.989	0.429	0.181	0.352	0.50632	0.218
c2_cp_v5	BIOCARTA_FMLP_PATHWAY	31	http://www.broadinstitute.org/gsea/msigdb/cards/BIOCARTA_FMLP_PATHWAY	-0.31994	-1.1303	0.2966	0.7046	1	0.226	0.165	0.189	0.68114	0.142
c2_cp_v5	REACTOME_FATTY_ACID_TRIACYLGLYCEROL_AND_KETONE_BODY_METABOLISM	150	http://www.broadinstitute.org/gsea/msigdb/cards/REACTOME_FATTY_ACID_TRIACYLGLYCEROL_AND_KETONE_BODY_METABOLISM	-0.25153	-1.1368	0.2119	0.70486	1	0.353	0.272	0.26	0.67522	0.147
c6_all_v5	ATF2_UP.V1_UP	121	http://www.broadinstitute.org/gsea/msigdb/cards/ATF2_UP.V1_UP	-0.29278	-1.1747	0.1828	0.70635	1	0.248	0.162	0.21	0.65843	0.173
c6_all_v5	CAHOY_OLIGODENDROCUTIC	69	http://www.broadinstitute.org/gsea/msigdb/cards/CAHOY_OLIGODENDROCUTIC	-0.32749	-1.2144	0.1762	0.70821	0.998	0.217	0.12	0.192	0.64815	0.19
c2_cp_v5	REACTOME_IMMUNOREGULATORY_INTERACTIONS_BETWEEN_A_LYMPHOID_AND_A_NON_LYMPHOID_CELL	53	http://www.broadinstitute.org/gsea/msigdb/cards/REACTOME_IMMUNOREGULATORY_INTERACTIONS_BETWEEN_A_LYMPHOID_AND_A_NON_LYMPHOID_CELL	-0.4169	-1.1125	0.3385	0.7168	1	0.283	0.118	0.251	0.69812	0.147
c2_cp_v5	REACTOME_SIGNAL_TRANSDUCTION_BY_L1	33	http://www.broadinstitute.org/gsea/msigdb/cards/REACTOME_SIGNAL_TRANSDUCTION_BY_L1	-0.33969	-1.1103	0.321	0.71847	1	0.273	0.214	0.215	0.69945	0.145
c2_cp_v5	REACTOME_MRNA_PROCESSING	151	http://www.broadinstitute.org/gsea/msigdb/cards/REACTOME_MRNA_PROCESSING	-0.25146	-1.1133	0.3539	0.71899	1	0.325	0.28	0.236	0.69914	0.147
c6_all_v5	RELA_DN.V1_UP	100	http://www.broadinstitute.org/gsea/msigdb/cards/RELA_DN.V1_UP	-0.31067	-1.1758	0.1904	0.72026	1	0.38	0.26	0.283	0.67275	0.186
c2_cp_v5	REACTOME_MUSCLE_CONTRACTION	36	http://www.broadinstitute.org/gsea/msigdb/cards/REACTOME_MUSCLE_CONTRACTION	-0.33565	-1.1143	0.3044	0.72041	1	0.222	0.123	0.195	0.70091	0.15
c6_all_v5	HOXA9_DN.V1_UP	171	http://www.broadinstitute.org/gsea/msigdb/cards/HOXA9_DN.V1_UP	-0.28168	-1.1569	0.1908	0.72159	1	0.234	0.159	0.199	0.68293	0.179
c2_cp_v5	KEGG_INTESTINAL_IMMUNE_NETWORK_FOR_IGA_PRODUCTION	28	http://www.broadinstitute.org/gsea/msigdb/cards/KEGG_INTESTINAL_IMMUNE_NETWORK_FOR_IGA_PRODUCTION	-0.38285	-1.1074	0.3395	0.72172	1	0.25	0.0895	0.228	0.70714	0.143
c2_cp_v5	KEGG_RNA_DEGRADATION	56	http://www.broadinstitute.org/gsea/msigdb/cards/KEGG_RNA_DEGRADATION	-0.40085	-1.4727	0.1013	0.7226	0.989	0.321	0.191	0.261	0.51966	0.229
c2_cp_v5	KEGG_VASCULAR_SMOOTH_MUSCLE_CONTRACTION	82	http://www.broadinstitute.org/gsea/msigdb/cards/KEGG_VASCULAR_SMOOTH_MUSCLE_CONTRACTION	-0.27984	-1.0968	0.3041	0.72464	1	0.341	0.231	0.264	0.70546	0.141
c2_cp_v5	REACTOME_HEMOSTASIS	353	http://www.broadinstitute.org/gsea/msigdb/cards/REACTOME_HEMOSTASIS	-0.2391	-1.098	0.2593	0.72566	1	0.3	0.266	0.226	0.70755	0.142
c2_cp_v5	REACTOME_PROTEIN_FOLDING	48	http://www.broadinstitute.org/gsea/msigdb/cards/REACTOME_PROTEIN_FOLDING	-0.32219	-1.0928	0.4014	0.72648	1	0.542	0.342	0.358	0.70812	0.137
c2_cp_v5	NABA_CORE_MATRISOME	149	http://www.broadinstitute.org/gsea/msigdb/cards/NABA_CORE_MATRISOME	-0.33616	-1.099	0.3338	0.7272	1	0.376	0.243	0.288	0.708	0.142
c6_all_v5	BMI1_DN_MEL18_DN.V1_UP	106	http://www.broadinstitute.org/gsea/msigdb/cards/BMI1_DN_MEL18_DN.V1_UP	-0.33792	-1.1992	0.1893	0.72728	0.999	0.415	0.272	0.305	0.6702	0.21
c2_cp_v5	KEGG_UBIQUITIN_MEDIATED_PROTEOLYSIS	126	http://www.broadinstitute.org/gsea/msigdb/cards/KEGG_UBIQUITIN_MEDIATED_PROTEOLYSIS	-0.20649	-1.1027	0.2972	0.72983	1	0.246	0.26	0.184	0.71243	0.148
c2_cp_v5	REACTOME_LATENT_INFECTION_OF_HOMO_SAPIENS_WITH_MYCOBACTERIUM_TUBERCULOSIS	26	http://www.broadinstitute.org/gsea/msigdb/cards/REACTOME_LATENT_INFECTION_OF_HOMO_SAPIENS_WITH_MYCOBACTERIUM_TUBERCULOSIS	-0.40992	-1.0929	0.3797	0.73009	1	0.615	0.334	0.411	0.71186	0.145
c2_cp_v5	REACTOME_PLATELET_ACTIVATION_SIGNALING_AND_AGGREGATION	173	http://www.broadinstitute.org/gsea/msigdb/cards/REACTOME_PLATELET_ACTIVATION_SIGNALING_AND_AGGREGATION	-0.2687	-1.0992	0.3086	0.73059	1	0.324	0.255	0.244	0.71183	0.145
c2_cp_v5	REACTOME_COSTIMULATION_BY_THE_CD28_FAMILY	53	http://www.broadinstitute.org/gsea/msigdb/cards/REACTOME_COSTIMULATION_BY_THE_CD28_FAMILY	-0.31825	-1.0994	0.3151	0.73387	1	0.189	0.0895	0.172	0.71545	0.153
c2_cp_v5	REACTOME_HIV_INFECTION	183	http://www.broadinstitute.org/gsea/msigdb/cards/REACTOME_HIV_INFECTION	-0.38178	-1.4749	0.1325	0.7351	0.989	0.437	0.286	0.317	0.52399	0.235
c2_cp_v5	REACTOME_TRANSCRIPTIONAL_REGULATION_OF_WHITE_ADIPOCYTE_DIFFERENTIATION	66	http://www.broadinstitute.org/gsea/msigdb/cards/REACTOME_TRANSCRIPTIONAL_REGULATION_OF_WHITE_ADIPOCYTE_DIFFERENTIATION	-0.25056	-1.0875	0.3161	0.73515	1	0.394	0.304	0.276	0.71769	0.146
c6_all_v5	WNT_UP.V1_UP	108	http://www.broadinstitute.org/gsea/msigdb/cards/WNT_UP.V1_UP	-0.29286	-1.2027	0.1279	0.73529	0.999	0.343	0.231	0.266	0.681	0.215
c2_cp_v5	PID_CERAMIDE_PATHWAY	48	http://www.broadinstitute.org/gsea/msigdb/cards/PID_CERAMIDE_PATHWAY	-0.27403	-1.0858	0.3293	0.73556	1	0.292	0.244	0.221	0.71609	0.146
c6_all_v5	E2F1_UP.V1_DN	158	http://www.broadinstitute.org/gsea/msigdb/cards/E2F1_UP.V1_DN	-0.2884	-1.1766	0.178	0.73654	1	0.266	0.171	0.223	0.68705	0.206
c2_cp_v5	PID_A6B1_A6B4_INTEGRIN_PATHWAY	41	http://www.broadinstitute.org/gsea/msigdb/cards/PID_A6B1_A6B4_INTEGRIN_PATHWAY	-0.33491	-1.0798	0.3647	0.73828	1	0.341	0.247	0.258	0.71911	0.144
c2_cp_v5	REACTOME_TRAF6_MEDIATED_INDUCTION_OF_NFKB_AND_MAP_KINASES_UPON_TLR7_8_OR_9_ACTIVATION	70	http://www.broadinstitute.org/gsea/msigdb/cards/REACTOME_TRAF6_MEDIATED_INDUCTION_OF_NFKB_AND_MAP_KINASES_UPON_TLR7_8_OR_9_ACTIVATION	-0.26124	-1.0761	0.3431	0.73968	1	0.286	0.209	0.227	0.72254	0.141
c6_all_v5	CAMP_UP.V1_DN	174	http://www.broadinstitute.org/gsea/msigdb/cards/CAMP_UP.V1_DN	-0.28686	-1.1912	0.1659	0.74009	1	0.31	0.224	0.244	0.68889	0.222
c2_cp_v5	REACTOME_SIGNALING_BY_THE_B_CELL_RECEPTOR_BCR	117	http://www.broadinstitute.org/gsea/msigdb/cards/REACTOME_SIGNALING_BY_THE_B_CELL_RECEPTOR_BCR	-0.23934	-1.0739	0.3409	0.74135	1	0.419	0.328	0.284	0.72348	0.14
c2_cp_v5	PID_NFAT_TFPATHWAY	40	http://www.broadinstitute.org/gsea/msigdb/cards/PID_NFAT_TFPATHWAY	-0.32878	-1.08	0.3417	0.74175	1	0.35	0.176	0.289	0.72282	0.148
c2_cp_v5	PID_SYNDECAN_1_PATHWAY	33	http://www.broadinstitute.org/gsea/msigdb/cards/PID_SYNDECAN_1_PATHWAY	-0.42053	-1.0765	0.3744	0.74255	1	0.424	0.205	0.338	0.72604	0.147
c2_cp_v5	REACTOME_RIG_I_MDA5_MEDIATED_INDUCTION_OF_IFN_ALPHA_BETA_PATHWAYS	58	http://www.broadinstitute.org/gsea/msigdb/cards/REACTOME_RIG_I_MDA5_MEDIATED_INDUCTION_OF_IFN_ALPHA_BETA_PATHWAYS	-0.2812	-1.0804	0.356	0.74458	1	0.379	0.315	0.261	0.72586	0.15
c2_cp_v5	REACTOME_METABOLISM_OF_LIPIDS_AND_LIPOPROTEINS	379	http://www.broadinstitute.org/gsea/msigdb/cards/REACTOME_METABOLISM_OF_LIPIDS_AND_LIPOPROTEINS	-0.2274	-1.0707	0.3078	0.74528	1	0.266	0.225	0.212	0.72851	0.143
c6_all_v5	NFE2L2.V2	282	http://www.broadinstitute.org/gsea/msigdb/cards/NFE2L2.V2	-0.27383	-1.1796	0.1329	0.74551	1	0.387	0.285	0.282	0.70036	0.218
c2_cp_v5	PID_INTEGRIN3_PATHWAY	38	http://www.broadinstitute.org/gsea/msigdb/cards/PID_INTEGRIN3_PATHWAY	-0.59421	-1.4761	0.05401	0.75192	0.989	0.658	0.257	0.49	0.54049	0.242
c6_all_v5	MTOR_UP.V1_UP	123	http://www.broadinstitute.org/gsea/msigdb/cards/MTOR_UP.V1_UP	-0.28727	-1.1828	0.1742	0.7536	1	0.309	0.232	0.239	0.70328	0.227
h_all_v5	HALLMARK_PI3K_AKT_MTOR_SIGNALING	93	http://www.broadinstitute.org/gsea/msigdb/cards/HALLMARK_PI3K_AKT_MTOR_SIGNALING	-0.18477	-0.8415	0.7168	0.75463	1	0.269	0.265	0.199	0.76389	0.03
c2_cp_v5	REACTOME_TRIF_MEDIATED_TLR3_SIGNALING	69	http://www.broadinstitute.org/gsea/msigdb/cards/REACTOME_TRIF_MEDIATED_TLR3_SIGNALING	-0.26626	-1.0633	0.3825	0.7563	1	0.261	0.195	0.211	0.73878	0.149
h_all_v5	HALLMARK_SPERMATOGENESIS	78	http://www.broadinstitute.org/gsea/msigdb/cards/HALLMARK_SPERMATOGENESIS	-0.22892	-0.85243	0.676	0.7565	1	0.218	0.201	0.175	0.7619	0.037
c2_cp_v5	NABA_BASEMENT_MEMBRANES	28	http://www.broadinstitute.org/gsea/msigdb/cards/NABA_BASEMENT_MEMBRANES	-0.4017	-1.0645	0.392	0.75671	1	0.357	0.196	0.288	0.73809	0.147
c2_cp_v5	KEGG_AMYOTROPHIC_LATERAL_SCLEROSIS_ALS	36	http://www.broadinstitute.org/gsea/msigdb/cards/KEGG_AMYOTROPHIC_LATERAL_SCLEROSIS_ALS	-0.29463	-1.061	0.3734	0.75811	1	0.389	0.25	0.293	0.74174	0.15
c6_all_v5	MEK_UP.V1_UP	163	http://www.broadinstitute.org/gsea/msigdb/cards/MEK_UP.V1_UP	-0.29346	-1.1421	0.2373	0.7616	1	0.245	0.15	0.211	0.7277	0.222
c2_cp_v5	REACTOME_LIPID_DIGESTION_MOBILIZATION_AND_TRANSPORT	36	http://www.broadinstitute.org/gsea/msigdb/cards/REACTOME_LIPID_DIGESTION_MOBILIZATION_AND_TRANSPORT	-0.35436	-1.0579	0.3941	0.76172	1	0.556	0.321	0.379	0.7465	0.153
c2_cp_v5	PID_MYC_PATHWAY	25	http://www.broadinstitute.org/gsea/msigdb/cards/PID_MYC_PATHWAY	-0.27084	-1.0561	0.3839	0.7623	1	0.24	0.173	0.199	0.74647	0.153
c2_cp_v5	REACTOME_ANTIGEN_PROCESSING_CROSS_PRESENTATION	63	http://www.broadinstitute.org/gsea/msigdb/cards/REACTOME_ANTIGEN_PROCESSING_CROSS_PRESENTATION	-0.5209	-1.4946	0.1121	0.76477	0.983	0.619	0.313	0.427	0.5258	0.249
c2_cp_v5	REACTOME_METABOLISM_OF_VITAMINS_AND_COFACTORS	43	http://www.broadinstitute.org/gsea/msigdb/cards/REACTOME_METABOLISM_OF_VITAMINS_AND_COFACTORS	-0.30086	-1.0534	0.3841	0.76506	1	0.442	0.347	0.29	0.74913	0.153
c2_cp_v5	PID_WNT_NONCANONICAL_PATHWAY	30	http://www.broadinstitute.org/gsea/msigdb/cards/PID_WNT_NONCANONICAL_PATHWAY	-0.31806	-1.05	0.4073	0.76583	1	0.3	0.196	0.242	0.75361	0.152
c6_all_v5	KRAS.LUNG.BREAST_UP.V1_UP	77	http://www.broadinstitute.org/gsea/msigdb/cards/KRAS.LUNG.BREAST_UP.V1_UP	-0.47189	-1.6001	0.01171	0.7667	0.373	0.403	0.173	0.335	0	0.314
c2_cp_v5	KEGG_PYRUVATE_METABOLISM	31	http://www.broadinstitute.org/gsea/msigdb/cards/KEGG_PYRUVATE_METABOLISM	-0.34831	-1.0504	0.4032	0.76867	1	0.355	0.171	0.295	0.75622	0.158
c2_cp_v5	REACTOME_TCA_CYCLE_AND_RESPIRATORY_ELECTRON_TRANSPORT	110	http://www.broadinstitute.org/gsea/msigdb/cards/REACTOME_TCA_CYCLE_AND_RESPIRATORY_ELECTRON_TRANSPORT	-0.55638	-1.4772	0.1368	0.77199	0.989	0.636	0.312	0.442	0.55603	0.248
c2_cp_v5	BIOCARTA_NO1_PATHWAY	26	http://www.broadinstitute.org/gsea/msigdb/cards/BIOCARTA_NO1_PATHWAY	-0.33253	-1.0448	0.3846	0.77469	1	0.346	0.238	0.264	0.76276	0.162
c2_cp_v5	PID_IL23_PATHWAY	28	http://www.broadinstitute.org/gsea/msigdb/cards/PID_IL23_PATHWAY	-0.34839	-1.0325	0.4388	0.7751	1	0.321	0.17	0.267	0.7618	0.153
c2_cp_v5	PID_IL1_PATHWAY	32	http://www.broadinstitute.org/gsea/msigdb/cards/PID_IL1_PATHWAY	-0.31644	-1.0332	0.4198	0.77684	1	0.219	0.176	0.181	0.76304	0.155
c2_cp_v5	REACTOME_ANTIGEN_PROCESSING_UBIQUITINATION_PROTEASOME_DEGRADATION	182	http://www.broadinstitute.org/gsea/msigdb/cards/REACTOME_ANTIGEN_PROCESSING_UBIQUITINATION_PROTEASOME_DEGRADATION	-0.3224	-1.4811	0.07924	0.77757	0.988	0.319	0.235	0.247	0.54812	0.256
c2_cp_v5	KEGG_N_GLYCAN_BIOSYNTHESIS	44	http://www.broadinstitute.org/gsea/msigdb/cards/KEGG_N_GLYCAN_BIOSYNTHESIS	-0.37444	-1.0356	0.4422	0.77825	1	0.523	0.327	0.353	0.76489	0.159
c2_cp_v5	PID_AVB3_OPN_PATHWAY	30	http://www.broadinstitute.org/gsea/msigdb/cards/PID_AVB3_OPN_PATHWAY	-0.33371	-1.0415	0.4311	0.77868	1	0.3	0.218	0.235	0.76795	0.164
c2_cp_v5	PID_IL8_CXCR1_PATHWAY	27	http://www.broadinstitute.org/gsea/msigdb/cards/PID_IL8_CXCR1_PATHWAY	-0.33637	-1.0397	0.3775	0.77932	1	0.185	0.0915	0.169	0.76503	0.164
c2_cp_v5	PID_IL6_7_PATHWAY	46	http://www.broadinstitute.org/gsea/msigdb/cards/PID_IL6_7_PATHWAY	-0.31904	-1.0335	0.4306	0.77989	1	0.391	0.259	0.291	0.76555	0.163
c2_cp_v5	REACTOME_PROCESSING_OF_CAPPED_INTRON_CONTAINING_PRE_MRNA	134	http://www.broadinstitute.org/gsea/msigdb/cards/REACTOME_PROCESSING_OF_CAPPED_INTRON_CONTAINING_PRE_MRNA	-0.24272	-1.0359	0.422	0.78119	1	0.313	0.28	0.228	0.76845	0.168
h_all_v5	HALLMARK_KRAS_SIGNALING_DN	103	http://www.broadinstitute.org/gsea/msigdb/cards/HALLMARK_KRAS_SIGNALING_DN	0.30482	1.2071	0.1342	0.78165	0.887	0.291	0.193	0.237	0.71429	0.334
c2_cp_v5	REACTOME_UNFOLDED_PROTEIN_RESPONSE	71	http://www.broadinstitute.org/gsea/msigdb/cards/REACTOME_UNFOLDED_PROTEIN_RESPONSE	-0.30433	-1.0365	0.4415	0.78334	1	0.423	0.314	0.291	0.76905	0.169
c2_cp_v5	PID_IL3_PATHWAY	25	http://www.broadinstitute.org/gsea/msigdb/cards/PID_IL3_PATHWAY	-0.32274	-1.006	0.4667	0.78754	1	0.16	0.0283	0.156	0.77847	0.153
c2_cp_v5	KEGG_PARKINSONS_DISEASE	99	http://www.broadinstitute.org/gsea/msigdb/cards/KEGG_PARKINSONS_DISEASE	-0.57772	-1.4955	0.1119	0.7886	0.983	0.687	0.308	0.479	0.54008	0.258
c2_cp_v5	KEGG_DRUG_METABOLISM_CYTOCHROME_P450	30	http://www.broadinstitute.org/gsea/msigdb/cards/KEGG_DRUG_METABOLISM_CYTOCHROME_P450	-0.37171	-1.008	0.4759	0.78965	1	0.2	0.0391	0.193	0.78075	0.158
c2_cp_v5	REACTOME_GOLGI_ASSOCIATED_VESICLE_BIOGENESIS	47	http://www.broadinstitute.org/gsea/msigdb/cards/REACTOME_GOLGI_ASSOCIATED_VESICLE_BIOGENESIS	-0.23802	-1.0065	0.4454	0.78979	1	0.319	0.267	0.235	0.78048	0.159
c2_cp_v5	KEGG_EPITHELIAL_CELL_SIGNALING_IN_HELICOBACTER_PYLORI_INFECTION	61	http://www.broadinstitute.org/gsea/msigdb/cards/KEGG_EPITHELIAL_CELL_SIGNALING_IN_HELICOBACTER_PYLORI_INFECTION	-0.26312	-1.0186	0.4177	0.78996	1	0.525	0.358	0.338	0.77894	0.166
c2_cp_v5	PID_TCPTP_PATHWAY	42	http://www.broadinstitute.org/gsea/msigdb/cards/PID_TCPTP_PATHWAY	-0.28096	-1.0138	0.4156	0.78999	1	0.238	0.18	0.196	0.78257	0.161
c2_cp_v5	REACTOME_THROMBIN_SIGNALLING_THROUGH_PROTEINASE_ACTIVATED_RECEPTORS_PARS	26	http://www.broadinstitute.org/gsea/msigdb/cards/REACTOME_THROMBIN_SIGNALLING_THROUGH_PROTEINASE_ACTIVATED_RECEPTORS_PARS	-0.29933	-1.0166	0.4288	0.79075	1	0.308	0.196	0.248	0.78392	0.163
c2_cp_v5	REACTOME_PPARA_ACTIVATES_GENE_EXPRESSION	93	http://www.broadinstitute.org/gsea/msigdb/cards/REACTOME_PPARA_ACTIVATES_GENE_EXPRESSION	-0.23637	-1.009	0.4556	0.79093	1	0.355	0.272	0.26	0.78328	0.16
c2_cp_v5	KEGG_ENDOCYTOSIS	159	http://www.broadinstitute.org/gsea/msigdb/cards/KEGG_ENDOCYTOSIS	-0.22926	-1.003	0.4327	0.79108	1	0.252	0.246	0.192	0.78091	0.162
c2_cp_v5	KEGG_JAK_STAT_SIGNALING_PATHWAY	99	http://www.broadinstitute.org/gsea/msigdb/cards/KEGG_JAK_STAT_SIGNALING_PATHWAY	-0.27292	-1.019	0.4281	0.79248	1	0.242	0.185	0.199	0.78212	0.168
c2_cp_v5	PID_ARF6_TRAFFICKING_PATHWAY	43	http://www.broadinstitute.org/gsea/msigdb/cards/PID_ARF6_TRAFFICKING_PATHWAY	-0.28102	-0.98577	0.493	0.79292	1	0.14	0.0775	0.129	0.78812	0.145
c2_cp_v5	KEGG_COMPLEMENT_AND_COAGULATION_CASCADES	46	http://www.broadinstitute.org/gsea/msigdb/cards/KEGG_COMPLEMENT_AND_COAGULATION_CASCADES	-0.56891	-1.4835	0.03937	0.79297	0.987	0.587	0.243	0.446	0.56544	0.262
c2_cp_v5	REACTOME_NEGATIVE_REGULATORS_OF_RIG_I_MDA5_SIGNALING	29	http://www.broadinstitute.org/gsea/msigdb/cards/REACTOME_NEGATIVE_REGULATORS_OF_RIG_I_MDA5_SIGNALING	-0.30622	-1.0139	0.4491	0.79321	1	0.448	0.345	0.294	0.78608	0.165
c2_cp_v5	REACTOME_NCAM1_INTERACTIONS	25	http://www.broadinstitute.org/gsea/msigdb/cards/REACTOME_NCAM1_INTERACTIONS	-0.37633	-0.98712	0.4746	0.79328	1	0.32	0.196	0.258	0.78585	0.146
c2_cp_v5	PID_P38_MKK3_6PATHWAY	25	http://www.broadinstitute.org/gsea/msigdb/cards/PID_P38_MKK3_6PATHWAY	-0.29809	-0.98989	0.4686	0.79368	1	0.24	0.146	0.205	0.78558	0.152
c2_cp_v5	REACTOME_G2_M_CHECKPOINTS	41	http://www.broadinstitute.org/gsea/msigdb/cards/REACTOME_G2_M_CHECKPOINTS	-0.35679	-0.98831	0.4897	0.79398	1	0.463	0.306	0.322	0.78668	0.149
c2_cp_v5	REACTOME_PHOSPHOLIPID_METABOLISM	160	http://www.broadinstitute.org/gsea/msigdb/cards/REACTOME_PHOSPHOLIPID_METABOLISM	-0.23231	-1.0091	0.4395	0.79413	1	0.2	0.157	0.171	0.78625	0.166
c2_cp_v5	BIOCARTA_PYK2_PATHWAY	27	http://www.broadinstitute.org/gsea/msigdb/cards/BIOCARTA_PYK2_PATHWAY	-0.30494	-1.0105	0.437	0.79432	1	0.222	0.176	0.183	0.78528	0.169
c2_cp_v5	PID_FGF_PATHWAY	44	http://www.broadinstitute.org/gsea/msigdb/cards/PID_FGF_PATHWAY	-0.31102	-1.0197	0.457	0.79449	1	0.25	0.171	0.208	0.78446	0.173
c2_cp_v5	REACTOME_SEMAPHORIN_INTERACTIONS	58	http://www.broadinstitute.org/gsea/msigdb/cards/REACTOME_SEMAPHORIN_INTERACTIONS	-0.27895	-1.0223	0.4415	0.79572	1	0.345	0.235	0.265	0.78569	0.176
c2_cp_v5	REACTOME_NFKB_AND_MAP_KINASES_ACTIVATION_MEDIATED_BY_TLR4_SIGNALING_REPERTOIRE	67	http://www.broadinstitute.org/gsea/msigdb/cards/REACTOME_NFKB_AND_MAP_KINASES_ACTIVATION_MEDIATED_BY_TLR4_SIGNALING_REPERTOIRE	-0.24831	-0.98998	0.4832	0.79683	1	0.254	0.195	0.205	0.78888	0.159
c2_cp_v5	PID_ENDOTHELIN_PATHWAY	55	http://www.broadinstitute.org/gsea/msigdb/cards/PID_ENDOTHELIN_PATHWAY	-0.27694	-1.0202	0.4145	0.79686	1	0.273	0.177	0.225	0.78677	0.175
c2_cp_v5	REACTOME_IRON_UPTAKE_AND_TRANSPORT	30	http://www.broadinstitute.org/gsea/msigdb/cards/REACTOME_IRON_UPTAKE_AND_TRANSPORT	-0.34612	-0.99607	0.4541	0.79687	1	0.433	0.247	0.327	0.78987	0.16
c2_cp_v5	REACTOME_SLC_MEDIATED_TRANSMEMBRANE_TRANSPORT	147	http://www.broadinstitute.org/gsea/msigdb/cards/REACTOME_SLC_MEDIATED_TRANSMEMBRANE_TRANSPORT	-0.26161	-0.98219	0.4812	0.79753	1	0.265	0.221	0.209	0.79219	0.15
c2_cp_v5	BIOCARTA_CARM_ER_PATHWAY	33	http://www.broadinstitute.org/gsea/msigdb/cards/BIOCARTA_CARM_ER_PATHWAY	-0.26848	-0.99065	0.4458	0.79866	1	0.273	0.156	0.231	0.79145	0.159
c2_cp_v5	KEGG_MAPK_SIGNALING_PATHWAY	205	http://www.broadinstitute.org/gsea/msigdb/cards/KEGG_MAPK_SIGNALING_PATHWAY	-0.2288	-0.99644	0.4434	0.79951	1	0.366	0.302	0.259	0.79304	0.167
c2_cp_v5	KEGG_GNRH_SIGNALING_PATHWAY	75	http://www.broadinstitute.org/gsea/msigdb/cards/KEGG_GNRH_SIGNALING_PATHWAY	-0.24382	-0.99177	0.5073	0.79963	1	0.253	0.187	0.207	0.79316	0.163
c2_cp_v5	KEGG_SPLICEOSOME	124	http://www.broadinstitute.org/gsea/msigdb/cards/KEGG_SPLICEOSOME	-0.25222	-0.99777	0.4733	0.79998	1	0.306	0.281	0.222	0.79319	0.171
c2_cp_v5	ST_WNT_BETA_CATENIN_PATHWAY	26	http://www.broadinstitute.org/gsea/msigdb/cards/ST_WNT_BETA_CATENIN_PATHWAY	-0.32803	-0.99301	0.4871	0.8002	1	0.192	0.0789	0.177	0.79238	0.166
c2_cp_v5	KEGG_CITRATE_CYCLE_TCA_CYCLE	27	http://www.broadinstitute.org/gsea/msigdb/cards/KEGG_CITRATE_CYCLE_TCA_CYCLE	-0.35161	-0.9721	0.4615	0.80096	1	0.407	0.312	0.281	0.79849	0.144
c2_cp_v5	REACTOME_TELOMERE_MAINTENANCE	35	http://www.broadinstitute.org/gsea/msigdb/cards/REACTOME_TELOMERE_MAINTENANCE	-0.35849	-0.97306	0.4961	0.80183	1	0.571	0.363	0.365	0.79746	0.145
c2_cp_v5	BIOCARTA_AT1R_PATHWAY	31	http://www.broadinstitute.org/gsea/msigdb/cards/BIOCARTA_AT1R_PATHWAY	-0.27859	-0.97419	0.4623	0.80249	1	0.258	0.192	0.209	0.79804	0.15
c6_all_v5	PRC2_SUZ12_UP.V1_UP	113	http://www.broadinstitute.org/gsea/msigdb/cards/PRC2_SUZ12_UP.V1_UP	-0.25618	-1.0854	0.2887	0.80264	1	0.23	0.196	0.187	0.77931	0.235
c2_cp_v5	PID_AVB3_INTEGRIN_PATHWAY	63	http://www.broadinstitute.org/gsea/msigdb/cards/PID_AVB3_INTEGRIN_PATHWAY	-0.31677	-0.97537	0.5057	0.80307	1	0.333	0.218	0.262	0.79697	0.151
c2_cp_v5	PID_S1P_S1P3_PATHWAY	27	http://www.broadinstitute.org/gsea/msigdb/cards/PID_S1P_S1P3_PATHWAY	-0.27478	-0.96791	0.5293	0.80349	1	0.185	0.0844	0.17	0.80333	0.145
c2_cp_v5	KEGG_NOD_LIKE_RECEPTOR_SIGNALING_PATHWAY	57	http://www.broadinstitute.org/gsea/msigdb/cards/KEGG_NOD_LIKE_RECEPTOR_SIGNALING_PATHWAY	-0.27618	-0.97592	0.4842	0.80513	1	0.333	0.223	0.26	0.7977	0.156
c2_cp_v5	REACTOME_SIGNALING_BY_ILS	97	http://www.broadinstitute.org/gsea/msigdb/cards/REACTOME_SIGNALING_BY_ILS	-0.24445	-0.96557	0.4981	0.80521	1	0.0928	0.0397	0.0898	0.80428	0.144
c2_cp_v5	REACTOME_INTEGRATION_OF_ENERGY_METABOLISM	82	http://www.broadinstitute.org/gsea/msigdb/cards/REACTOME_INTEGRATION_OF_ENERGY_METABOLISM	-0.22087	-0.96094	0.5655	0.80572	1	0.244	0.182	0.201	0.80439	0.136
c2_cp_v5	REACTOME_NEP_NS2_INTERACTS_WITH_THE_CELLULAR_EXPORT_MACHINERY	27	http://www.broadinstitute.org/gsea/msigdb/cards/REACTOME_NEP_NS2_INTERACTS_WITH_THE_CELLULAR_EXPORT_MACHINERY	-0.31076	-0.9624	0.5072	0.80574	1	0.296	0.252	0.222	0.80512	0.139
c2_cp_v5	REACTOME_MRNA_SPLICING	105	http://www.broadinstitute.org/gsea/msigdb/cards/REACTOME_MRNA_SPLICING	-0.22869	-0.95929	0.495	0.80628	1	0.21	0.178	0.174	0.80564	0.137
c2_cp_v5	REACTOME_G1_PHASE	32	http://www.broadinstitute.org/gsea/msigdb/cards/REACTOME_G1_PHASE	-0.29266	-0.96813	0.4956	0.80633	1	0.219	0.175	0.181	0.80628	0.151
c2_cp_v5	REACTOME_GPCR_DOWNSTREAM_SIGNALING	268	http://www.broadinstitute.org/gsea/msigdb/cards/REACTOME_GPCR_DOWNSTREAM_SIGNALING	-0.23606	-0.97627	0.4957	0.8076	1	0.306	0.241	0.237	0.80045	0.159
c2_cp_v5	BIOCARTA_MPR_PATHWAY	29	http://www.broadinstitute.org/gsea/msigdb/cards/BIOCARTA_MPR_PATHWAY	-0.26701	-0.95576	0.5182	0.80777	1	0.345	0.246	0.26	0.80832	0.134
c2_cp_v5	NABA_ECM_GLYCOPROTEINS	109	http://www.broadinstitute.org/gsea/msigdb/cards/NABA_ECM_GLYCOPROTEINS	-0.28968	-0.96245	0.4872	0.80883	1	0.358	0.243	0.273	0.8083	0.147
c6_all_v5	KRAS.600_UP.V1_UP	148	http://www.broadinstitute.org/gsea/msigdb/cards/KRAS.600_UP.V1_UP	-0.29447	-1.1213	0.2297	0.80894	1	0.277	0.178	0.23	0.77776	0.254
c2_cp_v5	REACTOME_AXON_GUIDANCE	187	http://www.broadinstitute.org/gsea/msigdb/cards/REACTOME_AXON_GUIDANCE	-0.24134	-0.95631	0.5145	0.80971	1	0.273	0.235	0.211	0.81138	0.139
c2_cp_v5	KEGG_CYTOKINE_CYTOKINE_RECEPTOR_INTERACTION	183	http://www.broadinstitute.org/gsea/msigdb/cards/KEGG_CYTOKINE_CYTOKINE_RECEPTOR_INTERACTION	-0.41219	-1.5093	0.01333	0.81004	0.978	0.355	0.189	0.292	0.54954	0.268
c6_all_v5	CSR_LATE_UP.V1_UP	139	http://www.broadinstitute.org/gsea/msigdb/cards/CSR_LATE_UP.V1_UP	-0.29416	-1.0869	0.3986	0.81195	1	0.403	0.301	0.285	0.79004	0.247
c2_cp_v5	KEGG_NUCLEOTIDE_EXCISION_REPAIR	43	http://www.broadinstitute.org/gsea/msigdb/cards/KEGG_NUCLEOTIDE_EXCISION_REPAIR	-0.29573	-0.95052	0.4868	0.816	1	0.558	0.389	0.342	0.81703	0.144
c2_cp_v5	REACTOME_CELL_SURFACE_INTERACTIONS_AT_THE_VASCULAR_WALL	72	http://www.broadinstitute.org/gsea/msigdb/cards/REACTOME_CELL_SURFACE_INTERACTIONS_AT_THE_VASCULAR_WALL	-0.44245	-1.4956	0.03	0.8198	0.983	0.222	0.0737	0.207	0.56168	0.271
c6_all_v5	RB_DN.V1_DN	105	http://www.broadinstitute.org/gsea/msigdb/cards/RB_DN.V1_DN	-0.28463	-1.1232	0.2542	0.82009	1	0.4	0.288	0.287	0.78679	0.273
c2_cp_v5	PID_ATF2_PATHWAY	50	http://www.broadinstitute.org/gsea/msigdb/cards/PID_ATF2_PATHWAY	-0.46829	-1.5012	0.05473	0.82151	0.981	0.44	0.192	0.357	0.55297	0.275
c2_cp_v5	REACTOME_NCAM_SIGNALING_FOR_NEURITE_OUT_GROWTH	48	http://www.broadinstitute.org/gsea/msigdb/cards/REACTOME_NCAM_SIGNALING_FOR_NEURITE_OUT_GROWTH	-0.27847	-0.94203	0.5522	0.82207	1	0.208	0.168	0.174	0.82257	0.147
c2_cp_v5	REACTOME_NUCLEAR_RECEPTOR_TRANSCRIPTION_PATHWAY	33	http://www.broadinstitute.org/gsea/msigdb/cards/REACTOME_NUCLEAR_RECEPTOR_TRANSCRIPTION_PATHWAY	-0.28359	-0.94307	0.5352	0.82292	1	0.394	0.274	0.287	0.82433	0.15
c6_all_v5	CAHOY_ASTROGLIAL	68	http://www.broadinstitute.org/gsea/msigdb/cards/CAHOY_ASTROGLIAL	-0.31277	-1.0878	0.3282	0.82453	1	0.368	0.222	0.287	0.80331	0.269
c2_cp_v5	KEGG_PEROXISOME	66	http://www.broadinstitute.org/gsea/msigdb/cards/KEGG_PEROXISOME	-0.28525	-0.94485	0.5236	0.82533	1	0.258	0.178	0.213	0.82564	0.156
c2_cp_v5	PID_VEGFR1_2_PATHWAY	67	http://www.broadinstitute.org/gsea/msigdb/cards/PID_VEGFR1_2_PATHWAY	-0.23582	-0.94307	0.5588	0.82607	1	0.254	0.203	0.203	0.82749	0.156
c2_cp_v5	KEGG_CHEMOKINE_SIGNALING_PATHWAY	164	http://www.broadinstitute.org/gsea/msigdb/cards/KEGG_CHEMOKINE_SIGNALING_PATHWAY	-0.23566	-0.93505	0.5751	0.82766	1	0.244	0.202	0.197	0.82958	0.151
h_all_v5	HALLMARK_CHOLESTEROL_HOMEOSTASIS	67	http://www.broadinstitute.org/gsea/msigdb/cards/HALLMARK_CHOLESTEROL_HOMEOSTASIS	-0.23011	-0.78484	0.7313	0.82826	1	0.299	0.228	0.232	0.84084	0.05
c2_cp_v5	PID_HIV_NEF_PATHWAY	34	http://www.broadinstitute.org/gsea/msigdb/cards/PID_HIV_NEF_PATHWAY	-0.27819	-0.93035	0.549	0.8285	1	0.324	0.241	0.246	0.83335	0.146
c2_cp_v5	REACTOME_GLYCOSPHINGOLIPID_METABOLISM	27	http://www.broadinstitute.org/gsea/msigdb/cards/REACTOME_GLYCOSPHINGOLIPID_METABOLISM	-0.31393	-0.9374	0.5528	0.82884	1	0.333	0.214	0.263	0.82872	0.155
c2_cp_v5	REACTOME_DNA_REPAIR	101	http://www.broadinstitute.org/gsea/msigdb/cards/REACTOME_DNA_REPAIR	-0.23651	-0.91552	0.5684	0.83009	1	0.446	0.356	0.289	0.8333	0.135
c2_cp_v5	KEGG_DNA_REPLICATION	36	http://www.broadinstitute.org/gsea/msigdb/cards/KEGG_DNA_REPLICATION	-0.34453	-0.91675	0.546	0.83051	1	0.472	0.345	0.31	0.83195	0.139
c2_cp_v5	REACTOME_SEMA4D_IN_SEMAPHORIN_SIGNALING	28	http://www.broadinstitute.org/gsea/msigdb/cards/REACTOME_SEMA4D_IN_SEMAPHORIN_SIGNALING	-0.28262	-0.93514	0.5642	0.83054	1	0.321	0.23	0.248	0.83271	0.154
c2_cp_v5	REACTOME_TRANSMEMBRANE_TRANSPORT_OF_SMALL_MOLECULES	259	http://www.broadinstitute.org/gsea/msigdb/cards/REACTOME_TRANSMEMBRANE_TRANSPORT_OF_SMALL_MOLECULES	-0.22671	-0.92638	0.563	0.83109	1	0.263	0.221	0.209	0.83421	0.143
c2_cp_v5	KEGG_AMINO_SUGAR_AND_NUCLEOTIDE_SUGAR_METABOLISM	41	http://www.broadinstitute.org/gsea/msigdb/cards/KEGG_AMINO_SUGAR_AND_NUCLEOTIDE_SUGAR_METABOLISM	-0.48995	-1.512	0.02664	0.83121	0.977	0.244	0.102	0.22	0.55885	0.27
c2_cp_v5	REACTOME_SIGNALING_BY_GPCR	346	http://www.broadinstitute.org/gsea/msigdb/cards/REACTOME_SIGNALING_BY_GPCR	-0.21639	-0.9305	0.6205	0.83129	1	0.292	0.241	0.227	0.83625	0.151
c2_cp_v5	REACTOME_ASPARAGINE_N_LINKED_GLYCOSYLATION	75	http://www.broadinstitute.org/gsea/msigdb/cards/REACTOME_ASPARAGINE_N_LINKED_GLYCOSYLATION	-0.2996	-0.91738	0.5623	0.83216	1	0.48	0.359	0.309	0.83365	0.145
c2_cp_v5	REACTOME_G_ALPHA_S_SIGNALLING_EVENTS	61	http://www.broadinstitute.org/gsea/msigdb/cards/REACTOME_G_ALPHA_S_SIGNALLING_EVENTS	-0.26713	-0.92138	0.6006	0.83269	1	0.328	0.241	0.25	0.83315	0.148
c2_cp_v5	REACTOME_BIOLOGICAL_OXIDATIONS	67	http://www.broadinstitute.org/gsea/msigdb/cards/REACTOME_BIOLOGICAL_OXIDATIONS	-0.27117	-0.92693	0.6012	0.83302	1	0.269	0.184	0.22	0.83559	0.152
c6_all_v5	SRC_UP.V1_DN	120	http://www.broadinstitute.org/gsea/msigdb/cards/SRC_UP.V1_DN	-0.26462	-1.0896	0.3126	0.83302	1	0.233	0.194	0.19	0.80845	0.274
c2_cp_v5	KEGG_METABOLISM_OF_XENOBIOTICS_BY_CYTOCHROME_P450	27	http://www.broadinstitute.org/gsea/msigdb/cards/KEGG_METABOLISM_OF_XENOBIOTICS_BY_CYTOCHROME_P450	-0.3419	-0.93109	0.5645	0.83311	1	0.296	0.178	0.244	0.83772	0.154
c2_cp_v5	REACTOME_CA_DEPENDENT_EVENTS	26	http://www.broadinstitute.org/gsea/msigdb/cards/REACTOME_CA_DEPENDENT_EVENTS	-0.26671	-0.91972	0.5857	0.83322	1	0.423	0.238	0.323	0.83417	0.148
c2_cp_v5	REACTOME_TRANSPORT_OF_MATURE_TRANSCRIPT_TO_CYTOPLASM	52	http://www.broadinstitute.org/gsea/msigdb/cards/REACTOME_TRANSPORT_OF_MATURE_TRANSCRIPT_TO_CYTOPLASM	-0.22019	-0.91786	0.5187	0.83409	1	0.231	0.252	0.173	0.83556	0.146
c2_cp_v5	REACTOME_DIABETES_PATHWAYS	110	http://www.broadinstitute.org/gsea/msigdb/cards/REACTOME_DIABETES_PATHWAYS	-0.23597	-0.92156	0.5814	0.83531	1	0.255	0.191	0.208	0.83547	0.15
c2_cp_v5	KEGG_VALINE_LEUCINE_AND_ISOLEUCINE_DEGRADATION	42	http://www.broadinstitute.org/gsea/msigdb/cards/KEGG_VALINE_LEUCINE_AND_ISOLEUCINE_DEGRADATION	-0.32497	-0.91154	0.546	0.83538	1	0.548	0.351	0.356	0.83983	0.14
c2_cp_v5	REACTOME_ACTIVATION_OF_ATR_IN_RESPONSE_TO_REPLICATION_STRESS	35	http://www.broadinstitute.org/gsea/msigdb/cards/REACTOME_ACTIVATION_OF_ATR_IN_RESPONSE_TO_REPLICATION_STRESS	-0.33657	-0.92178	0.5572	0.83784	1	0.429	0.306	0.298	0.83842	0.156
c6_all_v5	ESC_J1_UP_LATE.V1_DN	145	http://www.broadinstitute.org/gsea/msigdb/cards/ESC_J1_UP_LATE.V1_DN	-0.2554	-1.0914	0.301	0.84302	1	0.393	0.311	0.274	0.81633	0.285
c6_all_v5	RB_DN.V1_UP	120	http://www.broadinstitute.org/gsea/msigdb/cards/RB_DN.V1_UP	-0.25486	-1.0657	0.3615	0.84746	1	0.35	0.269	0.258	0.82753	0.284
c2_cp_v5	KEGG_AMINOACYL_TRNA_BIOSYNTHESIS	40	http://www.broadinstitute.org/gsea/msigdb/cards/KEGG_AMINOACYL_TRNA_BIOSYNTHESIS	-0.31532	-0.90266	0.5416	0.84784	1	0.375	0.316	0.257	0.85087	0.151
h_all_v5	HALLMARK_REACTIVE_OXIGEN_SPECIES_PATHWAY	43	http://www.broadinstitute.org/gsea/msigdb/cards/HALLMARK_REACTIVE_OXIGEN_SPECIES_PATHWAY	-0.20368	-0.75746	0.8523	0.84855	1	0.326	0.303	0.228	0.86124	0.038
c2_cp_v5	PID_ERBB1_DOWNSTREAM_PATHWAY	102	http://www.broadinstitute.org/gsea/msigdb/cards/PID_ERBB1_DOWNSTREAM_PATHWAY	-0.20786	-0.90359	0.631	0.8491	1	0.284	0.265	0.21	0.85354	0.154
c6_all_v5	YAP1_UP	39	http://www.broadinstitute.org/gsea/msigdb/cards/YAP1_UP	-0.31837	-1.0693	0.3617	0.84951	1	0.205	0.103	0.184	0.82963	0.288
c6_all_v5	DCA_UP.V1_UP	104	http://www.broadinstitute.org/gsea/msigdb/cards/DCA_UP.V1_UP	-0.27166	-1.0943	0.2707	0.84994	1	0.356	0.261	0.265	0.82178	0.295
c2_cp_v5	REACTOME_PKB_MEDIATED_EVENTS	25	http://www.broadinstitute.org/gsea/msigdb/cards/REACTOME_PKB_MEDIATED_EVENTS	-0.24752	-0.89424	0.6068	0.85064	1	0.28	0.239	0.213	0.85152	0.143
c2_cp_v5	REACTOME_G_ALPHA_Q_SIGNALLING_EVENTS	97	http://www.broadinstitute.org/gsea/msigdb/cards/REACTOME_G_ALPHA_Q_SIGNALLING_EVENTS	-0.22081	-0.89525	0.6954	0.85154	1	0.124	0.0659	0.116	0.85295	0.152
c2_cp_v5	PID_IL12_2PATHWAY	55	http://www.broadinstitute.org/gsea/msigdb/cards/PID_IL12_2PATHWAY	-0.29307	-0.89597	0.5853	0.85308	1	0.273	0.192	0.221	0.85424	0.156
c2_cp_v5	KEGG_FATTY_ACID_METABOLISM	33	http://www.broadinstitute.org/gsea/msigdb/cards/KEGG_FATTY_ACID_METABOLISM	-0.30095	-0.8963	0.6049	0.85536	1	0.394	0.264	0.291	0.85559	0.159
c2_cp_v5	BIOCARTA_VEGF_PATHWAY	29	http://www.broadinstitute.org/gsea/msigdb/cards/BIOCARTA_VEGF_PATHWAY	-0.24785	-0.89706	0.6128	0.85668	1	0.414	0.286	0.296	0.85789	0.162
c6_all_v5	RAF_UP.V1_UP	161	http://www.broadinstitute.org/gsea/msigdb/cards/RAF_UP.V1_UP	-0.2613	-1.0591	0.3562	0.857	1	0.286	0.214	0.227	0.83651	0.296
c2_cp_v5	REACTOME_CELL_CELL_COMMUNICATION	81	http://www.broadinstitute.org/gsea/msigdb/cards/REACTOME_CELL_CELL_COMMUNICATION	-0.41424	-1.5142	0.007874	0.85854	0.977	0.272	0.102	0.245	0.57798	0.277
c6_all_v5	TBK1.DF_UP	248	http://www.broadinstitute.org/gsea/msigdb/cards/TBK1.DF_UP	-0.24976	-1.1008	0.274	0.85922	1	0.262	0.209	0.211	0.83243	0.303
c6_all_v5	ESC_J1_UP_EARLY.V1_DN	144	http://www.broadinstitute.org/gsea/msigdb/cards/ESC_J1_UP_EARLY.V1_DN	-0.25727	-1.0951	0.2859	0.86504	1	0.361	0.264	0.269	0.83613	0.316
c6_all_v5	ESC_V6.5_UP_LATE.V1_DN	146	http://www.broadinstitute.org/gsea/msigdb/cards/ESC_V6.5_UP_LATE.V1_DN	-0.25991	-1.1036	0.2725	0.86598	1	0.37	0.294	0.264	0.84017	0.317
c2_cp_v5	BIOCARTA_CHREBP2_PATHWAY	33	http://www.broadinstitute.org/gsea/msigdb/cards/BIOCARTA_CHREBP2_PATHWAY	-0.23733	-0.88487	0.626	0.86694	1	0.333	0.252	0.25	0.86835	0.167
c2_cp_v5	ST_T_CELL_SIGNAL_TRANSDUCTION	42	http://www.broadinstitute.org/gsea/msigdb/cards/ST_T_CELL_SIGNAL_TRANSDUCTION	-0.25879	-0.88278	0.6485	0.86831	1	0.167	0.116	0.148	0.87006	0.168
c6_all_v5	GCNP_SHH_UP_EARLY.V1_UP	141	http://www.broadinstitute.org/gsea/msigdb/cards/GCNP_SHH_UP_EARLY.V1_UP	0.22422	0.96836	0.4883	0.87348	1	0.17	0.142	0.148	0.88503	0.286
c2_cp_v5	PID_ARF6_PATHWAY	30	http://www.broadinstitute.org/gsea/msigdb/cards/PID_ARF6_PATHWAY	-0.28651	-0.87781	0.6209	0.87566	1	0.3	0.196	0.242	0.87652	0.181
c6_all_v5	PTEN_DN.V2_UP	89	http://www.broadinstitute.org/gsea/msigdb/cards/PTEN_DN.V2_UP	-0.26575	-1.0121	0.435	0.87637	1	0.258	0.157	0.219	0.86464	0.31
c6_all_v5	ESC_J1_UP_EARLY.V1_UP	124	http://www.broadinstitute.org/gsea/msigdb/cards/ESC_J1_UP_EARLY.V1_UP	-0.26094	-1.0069	0.4276	0.88197	1	0.266	0.187	0.219	0.87589	0.319
c6_all_v5	LTE2_UP.V1_UP	150	http://www.broadinstitute.org/gsea/msigdb/cards/LTE2_UP.V1_UP	-0.23646	-1.0141	0.4472	0.88228	1	0.14	0.103	0.127	0.87087	0.321
c2_cp_v5	REACTOME_CYTOKINE_SIGNALING_IN_IMMUNE_SYSTEM	223	http://www.broadinstitute.org/gsea/msigdb/cards/REACTOME_CYTOKINE_SIGNALING_IN_IMMUNE_SYSTEM	-0.20552	-0.84593	0.6816	0.88245	1	0.336	0.324	0.231	0.88242	0.156
c6_all_v5	TBK1.DN.48HRS_UP	49	http://www.broadinstitute.org/gsea/msigdb/cards/TBK1.DN.48HRS_UP	-0.25361	-1.0484	0.3592	0.88267	1	0.265	0.209	0.211	0.86503	0.324
c2_cp_v5	REACTOME_NETRIN1_SIGNALING	25	http://www.broadinstitute.org/gsea/msigdb/cards/REACTOME_NETRIN1_SIGNALING	-0.30925	-0.86929	0.6439	0.88391	1	0.2	0.0661	0.187	0.88596	0.189
c2_cp_v5	REACTOME_DEVELOPMENTAL_BIOLOGY	288	http://www.broadinstitute.org/gsea/msigdb/cards/REACTOME_DEVELOPMENTAL_BIOLOGY	-0.2044	-0.87066	0.6815	0.8843	1	0.274	0.254	0.209	0.88599	0.194
c2_cp_v5	REACTOME_AQUAPORIN_MEDIATED_TRANSPORT	32	http://www.broadinstitute.org/gsea/msigdb/cards/REACTOME_AQUAPORIN_MEDIATED_TRANSPORT	-0.26615	-0.872	0.6753	0.88456	1	0.25	0.132	0.218	0.88606	0.198
c2_cp_v5	KEGG_TYPE_II_DIABETES_MELLITUS	32	http://www.broadinstitute.org/gsea/msigdb/cards/KEGG_TYPE_II_DIABETES_MELLITUS	-0.27195	-0.86142	0.6354	0.88479	1	0.125	0.0599	0.118	0.88621	0.186
c2_cp_v5	KEGG_NATURAL_KILLER_CELL_MEDIATED_CYTOTOXICITY	104	http://www.broadinstitute.org/gsea/msigdb/cards/KEGG_NATURAL_KILLER_CELL_MEDIATED_CYTOTOXICITY	-0.22715	-0.84615	0.6992	0.88488	1	0.26	0.246	0.197	0.88528	0.161
c2_cp_v5	REACTOME_REGULATION_OF_GLUCOKINASE_BY_GLUCOKINASE_REGULATORY_PROTEIN	25	http://www.broadinstitute.org/gsea/msigdb/cards/REACTOME_REGULATION_OF_GLUCOKINASE_BY_GLUCOKINASE_REGULATORY_PROTEIN	-0.27547	-0.84273	0.632	0.88568	1	0.28	0.252	0.21	0.88753	0.163
c6_all_v5	CTIP_DN.V1_DN	84	http://www.broadinstitute.org/gsea/msigdb/cards/CTIP_DN.V1_DN	0.30046	1.2234	0.1	0.88571	0.952	0.31	0.183	0.255	0.8224	0.355
c2_cp_v5	REACTOME_SPHINGOLIPID_METABOLISM	53	http://www.broadinstitute.org/gsea/msigdb/cards/REACTOME_SPHINGOLIPID_METABOLISM	-0.24454	-0.86224	0.662	0.88612	1	0.245	0.214	0.194	0.88643	0.189
c2_cp_v5	REACTOME_TRANSPORT_TO_THE_GOLGI_AND_SUBSEQUENT_MODIFICATION	29	http://www.broadinstitute.org/gsea/msigdb/cards/REACTOME_TRANSPORT_TO_THE_GOLGI_AND_SUBSEQUENT_MODIFICATION	-0.29052	-0.85019	0.6719	0.88613	1	0.517	0.359	0.332	0.88613	0.167
c2_cp_v5	WNT_SIGNALING	68	http://www.broadinstitute.org/gsea/msigdb/cards/WNT_SIGNALING	-0.21594	-0.83619	0.7887	0.88625	1	0.221	0.173	0.183	0.8899	0.155
c2_cp_v5	KEGG_ANTIGEN_PROCESSING_AND_PRESENTATION	45	http://www.broadinstitute.org/gsea/msigdb/cards/KEGG_ANTIGEN_PROCESSING_AND_PRESENTATION	-0.27612	-0.8377	0.7071	0.88641	1	0.378	0.278	0.274	0.88998	0.157
c2_cp_v5	REACTOME_GLUCONEOGENESIS	25	http://www.broadinstitute.org/gsea/msigdb/cards/REACTOME_GLUCONEOGENESIS	-0.28496	-0.85146	0.6566	0.88642	1	0.52	0.326	0.351	0.88805	0.172
c2_cp_v5	REACTOME_TRANSPORT_OF_MATURE_MRNA_DERIVED_FROM_AN_INTRONLESS_TRANSCRIPT	32	http://www.broadinstitute.org/gsea/msigdb/cards/REACTOME_TRANSPORT_OF_MATURE_MRNA_DERIVED_FROM_AN_INTRONLESS_TRANSCRIPT	-0.24588	-0.84054	0.6165	0.88683	1	0.25	0.252	0.188	0.88903	0.163
c2_cp_v5	REACTOME_MAPK_TARGETS_NUCLEAR_EVENTS_MEDIATED_BY_MAP_KINASES	30	http://www.broadinstitute.org/gsea/msigdb/cards/REACTOME_MAPK_TARGETS_NUCLEAR_EVENTS_MEDIATED_BY_MAP_KINASES	-0.26372	-0.84622	0.6716	0.88761	1	0.267	0.192	0.216	0.88757	0.171
c2_cp_v5	PID_AP1_PATHWAY	59	http://www.broadinstitute.org/gsea/msigdb/cards/PID_AP1_PATHWAY	-0.25396	-0.85225	0.6862	0.88763	1	0.39	0.303	0.273	0.89015	0.175
c2_cp_v5	PID_P38_ALPHA_BETA_PATHWAY	29	http://www.broadinstitute.org/gsea/msigdb/cards/PID_P38_ALPHA_BETA_PATHWAY	-0.28049	-0.86283	0.6338	0.88799	1	0.172	0.112	0.153	0.88861	0.193
c2_cp_v5	REACTOME_AMINO_ACID_AND_OLIGOPEPTIDE_SLC_TRANSPORTERS	30	http://www.broadinstitute.org/gsea/msigdb/cards/REACTOME_AMINO_ACID_AND_OLIGOPEPTIDE_SLC_TRANSPORTERS	-0.30859	-0.86582	0.5944	0.88809	1	0.367	0.266	0.27	0.89006	0.196
c2_cp_v5	PID_CXCR3_PATHWAY	40	http://www.broadinstitute.org/gsea/msigdb/cards/PID_CXCR3_PATHWAY	-0.26479	-0.86399	0.6553	0.88867	1	0.2	0.144	0.172	0.88947	0.195
c2_cp_v5	PID_P38_ALPHA_BETA_DOWNSTREAM_PATHWAY	37	http://www.broadinstitute.org/gsea/msigdb/cards/PID_P38_ALPHA_BETA_DOWNSTREAM_PATHWAY	-0.23389	-0.8378	0.7182	0.88906	1	0.405	0.265	0.299	0.89212	0.167
c2_cp_v5	KEGG_BUTANOATE_METABOLISM	26	http://www.broadinstitute.org/gsea/msigdb/cards/KEGG_BUTANOATE_METABOLISM	-0.28944	-0.85285	0.674	0.88941	1	0.385	0.289	0.274	0.89003	0.186
c2_cp_v5	PID_HNF3A_PATHWAY	29	http://www.broadinstitute.org/gsea/msigdb/cards/PID_HNF3A_PATHWAY	-0.27197	-0.84673	0.6848	0.88959	1	0.414	0.207	0.329	0.88975	0.173
c2_cp_v5	PID_ILK_PATHWAY	44	http://www.broadinstitute.org/gsea/msigdb/cards/PID_ILK_PATHWAY	-0.21612	-0.83154	0.741	0.89185	1	0.159	0.101	0.144	0.89485	0.161
c2_cp_v5	KEGG_CELL_CYCLE	115	http://www.broadinstitute.org/gsea/msigdb/cards/KEGG_CELL_CYCLE	-0.23149	-0.85289	0.6345	0.89229	1	0.322	0.289	0.231	0.89298	0.194
c2_cp_v5	REACTOME_INTERACTIONS_OF_VPR_WITH_HOST_CELLULAR_PROTEINS	32	http://www.broadinstitute.org/gsea/msigdb/cards/REACTOME_INTERACTIONS_OF_VPR_WITH_HOST_CELLULAR_PROTEINS	-0.24769	-0.82522	0.6348	0.89261	1	0.281	0.282	0.202	0.89321	0.153
c2_cp_v5	REACTOME_DNA_STRAND_ELONGATION	30	http://www.broadinstitute.org/gsea/msigdb/cards/REACTOME_DNA_STRAND_ELONGATION	-0.36304	-0.85539	0.63	0.89355	1	0.533	0.357	0.343	0.89403	0.201
c6_all_v5	PKCA_DN.V1_UP	102	http://www.broadinstitute.org/gsea/msigdb/cards/PKCA_DN.V1_UP	-0.26657	-1.0146	0.4315	0.89361	1	0.304	0.254	0.228	0.88343	0.337
c2_cp_v5	KEGG_PATHWAYS_IN_CANCER	271	http://www.broadinstitute.org/gsea/msigdb/cards/KEGG_PATHWAYS_IN_CANCER	-0.2064	-0.85373	0.7228	0.89371	1	0.255	0.227	0.201	0.89468	0.199
c2_cp_v5	REACTOME_POST_TRANSLATIONAL_PROTEIN_MODIFICATION	140	http://www.broadinstitute.org/gsea/msigdb/cards/REACTOME_POST_TRANSLATIONAL_PROTEIN_MODIFICATION	-0.24614	-0.82608	0.6748	0.8938	1	0.429	0.344	0.284	0.89434	0.159
c2_cp_v5	REACTOME_GASTRIN_CREB_SIGNALLING_PATHWAY_VIA_PKC_AND_MAPK	117	http://www.broadinstitute.org/gsea/msigdb/cards/REACTOME_GASTRIN_CREB_SIGNALLING_PATHWAY_VIA_PKC_AND_MAPK	-0.18904	-0.8285	0.8742	0.89486	1	0.128	0.107	0.115	0.897	0.165
c6_all_v5	PRC2_EDD_UP.V1_DN	122	http://www.broadinstitute.org/gsea/msigdb/cards/PRC2_EDD_UP.V1_DN	-0.26189	-1.0219	0.3961	0.89615	1	0.262	0.193	0.214	0.88889	0.344
c2_cp_v5	REACTOME_NUCLEAR_SIGNALING_BY_ERBB4	26	http://www.broadinstitute.org/gsea/msigdb/cards/REACTOME_NUCLEAR_SIGNALING_BY_ERBB4	-0.27138	-0.82609	0.6853	0.89661	1	0.115	0.0397	0.111	0.89716	0.166
c2_cp_v5	REACTOME_CYCLIN_E_ASSOCIATED_EVENTS_DURING_G1_S_TRANSITION_	59	http://www.broadinstitute.org/gsea/msigdb/cards/REACTOME_CYCLIN_E_ASSOCIATED_EVENTS_DURING_G1_S_TRANSITION_	-0.49488	-1.5149	0.104	0.89717	0.977	0.61	0.328	0.412	0.60228	0.293
c6_all_v5	CYCLIN_D1_UP.V1_DN	136	http://www.broadinstitute.org/gsea/msigdb/cards/CYCLIN_D1_UP.V1_DN	0.20622	0.97111	0.5385	0.90051	1	0.309	0.228	0.241	0.91081	0.347
c6_all_v5	EIF4E_UP	77	http://www.broadinstitute.org/gsea/msigdb/cards/EIF4E_UP	-0.30403	-1.0163	0.4705	0.90146	1	0.26	0.155	0.221	0.89286	0.35
c6_all_v5	STK33_NOMO_UP	248	http://www.broadinstitute.org/gsea/msigdb/cards/STK33_NOMO_UP	-0.27016	-1.0353	0.4199	0.90198	1	0.339	0.239	0.262	0.88369	0.353
c2_cp_v5	REACTOME_RECYCLING_PATHWAY_OF_L1	25	http://www.broadinstitute.org/gsea/msigdb/cards/REACTOME_RECYCLING_PATHWAY_OF_L1	-0.23219	-0.80439	0.7678	0.90235	1	0.28	0.214	0.221	0.90527	0.154
c6_all_v5	WNT_UP.V1_DN	110	http://www.broadinstitute.org/gsea/msigdb/cards/WNT_UP.V1_DN	0.23549	0.98053	0.5014	0.90352	1	0.227	0.146	0.196	0.91138	0.358
c2_cp_v5	PID_FOXO_PATHWAY	46	http://www.broadinstitute.org/gsea/msigdb/cards/PID_FOXO_PATHWAY	-0.22418	-0.80658	0.7082	0.90388	1	0.391	0.326	0.265	0.90651	0.162
c2_cp_v5	REACTOME_G_ALPHA_Z_SIGNALLING_EVENTS	35	http://www.broadinstitute.org/gsea/msigdb/cards/REACTOME_G_ALPHA_Z_SIGNALLING_EVENTS	-0.24084	-0.80506	0.7644	0.9039	1	0.2	0.132	0.174	0.90673	0.16
c2_cp_v5	REACTOME_PHOSPHOLIPASE_C_MEDIATED_CASCADE	35	http://www.broadinstitute.org/gsea/msigdb/cards/REACTOME_PHOSPHOLIPASE_C_MEDIATED_CASCADE	-0.23097	-0.81219	0.7833	0.90499	1	0.257	0.165	0.215	0.90933	0.173
c2_cp_v5	KEGG_VEGF_SIGNALING_PATHWAY	64	http://www.broadinstitute.org/gsea/msigdb/cards/KEGG_VEGF_SIGNALING_PATHWAY	-0.21139	-0.80072	0.7889	0.90586	1	0.234	0.212	0.186	0.90886	0.159
c2_cp_v5	PID_P75_NTR_PATHWAY	60	http://www.broadinstitute.org/gsea/msigdb/cards/PID_P75_NTR_PATHWAY	-0.19331	-0.78775	0.8182	0.90606	1	0.317	0.225	0.247	0.90994	0.143
c2_cp_v5	REACTOME_INTERFERON_SIGNALING	126	http://www.broadinstitute.org/gsea/msigdb/cards/REACTOME_INTERFERON_SIGNALING	-0.21755	-0.80659	0.6983	0.90662	1	0.349	0.315	0.241	0.90929	0.169
c2_cp_v5	KEGG_VIBRIO_CHOLERAE_INFECTION	46	http://www.broadinstitute.org/gsea/msigdb/cards/KEGG_VIBRIO_CHOLERAE_INFECTION	-0.25278	-0.81278	0.6945	0.90673	1	0.565	0.364	0.361	0.91082	0.18
c6_all_v5	ESC_J1_UP_LATE.V1_UP	132	http://www.broadinstitute.org/gsea/msigdb/cards/ESC_J1_UP_LATE.V1_UP	-0.28294	-1.0229	0.4194	0.90675	1	0.295	0.223	0.232	0.89955	0.358
c2_cp_v5	REACTOME_E2F_MEDIATED_REGULATION_OF_DNA_REPLICATION	32	http://www.broadinstitute.org/gsea/msigdb/cards/REACTOME_E2F_MEDIATED_REGULATION_OF_DNA_REPLICATION	-0.29182	-0.81421	0.657	0.9071	1	0.219	0.175	0.181	0.91214	0.183
c2_cp_v5	PID_RETINOIC_ACID_PATHWAY	28	http://www.broadinstitute.org/gsea/msigdb/cards/PID_RETINOIC_ACID_PATHWAY	-0.22473	-0.79204	0.8018	0.90718	1	0.214	0.158	0.181	0.91155	0.155
c2_cp_v5	REACTOME_DOWNSTREAM_TCR_SIGNALING	27	http://www.broadinstitute.org/gsea/msigdb/cards/REACTOME_DOWNSTREAM_TCR_SIGNALING	-0.25605	-0.80924	0.6698	0.90753	1	0.259	0.17	0.216	0.91215	0.177
c2_cp_v5	PID_CXCR4_PATHWAY	96	http://www.broadinstitute.org/gsea/msigdb/cards/PID_CXCR4_PATHWAY	-0.21382	-0.78852	0.7908	0.90753	1	0.219	0.196	0.177	0.91135	0.153
c2_cp_v5	KEGG_BASAL_CELL_CARCINOMA	41	http://www.broadinstitute.org/gsea/msigdb/cards/KEGG_BASAL_CELL_CARCINOMA	-0.25858	-0.79003	0.79	0.90778	1	0.22	0.119	0.194	0.91166	0.156
c2_cp_v5	REACTOME_CLASS_B_2_SECRETIN_FAMILY_RECEPTORS	51	http://www.broadinstitute.org/gsea/msigdb/cards/REACTOME_CLASS_B_2_SECRETIN_FAMILY_RECEPTORS	-0.24674	-0.77982	0.7814	0.90838	1	0.333	0.241	0.254	0.91351	0.141
c6_all_v5	ATF2_UP.V1_DN	139	http://www.broadinstitute.org/gsea/msigdb/cards/ATF2_UP.V1_DN	-0.27678	-1.0298	0.4069	0.90919	1	0.281	0.212	0.223	0.90252	0.361
c2_cp_v5	PID_FAK_PATHWAY	57	http://www.broadinstitute.org/gsea/msigdb/cards/PID_FAK_PATHWAY	-0.23343	-0.79722	0.7266	0.90925	1	0.211	0.171	0.175	0.91213	0.166
c2_cp_v5	REACTOME_SIGNALING_BY_PDGF	110	http://www.broadinstitute.org/gsea/msigdb/cards/REACTOME_SIGNALING_BY_PDGF	-0.22077	-0.80661	0.7302	0.90939	1	0.3	0.246	0.228	0.91209	0.176
c2_cp_v5	REACTOME_SPHINGOLIPID_DE_NOVO_BIOSYNTHESIS	26	http://www.broadinstitute.org/gsea/msigdb/cards/REACTOME_SPHINGOLIPID_DE_NOVO_BIOSYNTHESIS	-0.24962	-0.79232	0.723	0.90942	1	0.423	0.35	0.276	0.91271	0.164
c2_cp_v5	BIOCARTA_RACCYCD_PATHWAY	26	http://www.broadinstitute.org/gsea/msigdb/cards/BIOCARTA_RACCYCD_PATHWAY	-0.2391	-0.79549	0.7304	0.90947	1	0.192	0.175	0.159	0.9128	0.167
c2_cp_v5	PID_LYSOPHOSPHOLIPID_PATHWAY	57	http://www.broadinstitute.org/gsea/msigdb/cards/PID_LYSOPHOSPHOLIPID_PATHWAY	-0.2341	-0.81435	0.7297	0.90972	1	0.281	0.187	0.229	0.91499	0.189
c2_cp_v5	REACTOME_NUCLEOTIDE_BINDING_DOMAIN_LEUCINE_RICH_REPEAT_CONTAINING_RECEPTOR_NLR_SIGNALING_PATHWAYS	43	http://www.broadinstitute.org/gsea/msigdb/cards/REACTOME_NUCLEOTIDE_BINDING_DOMAIN_LEUCINE_RICH_REPEAT_CONTAINING_RECEPTOR_NLR_SIGNALING_PATHWAYS	-0.22077	-0.78058	0.8446	0.90985	1	0.233	0.17	0.194	0.9144	0.146
c2_cp_v5	BIOCARTA_DEATH_PATHWAY	32	http://www.broadinstitute.org/gsea/msigdb/cards/BIOCARTA_DEATH_PATHWAY	-0.22555	-0.78194	0.8	0.91028	1	0.562	0.401	0.338	0.91418	0.151
c6_all_v5	BMI1_DN_MEL18_DN.V1_DN	104	http://www.broadinstitute.org/gsea/msigdb/cards/BMI1_DN_MEL18_DN.V1_DN	-0.27756	-0.9953	0.4671	0.91086	1	0.394	0.278	0.287	0.90749	0.362
c6_all_v5	RB_P130_DN.V1_DN	114	http://www.broadinstitute.org/gsea/msigdb/cards/RB_P130_DN.V1_DN	-0.22708	-0.99159	0.46	0.91096	1	0.316	0.26	0.236	0.90972	0.37
c6_all_v5	MTOR_UP.V1_DN	138	http://www.broadinstitute.org/gsea/msigdb/cards/MTOR_UP.V1_DN	-0.26106	-1.0369	0.3906	0.91108	1	0.391	0.305	0.275	0.89355	0.369
c2_cp_v5	PID_IL12_STAT4_PATHWAY	29	http://www.broadinstitute.org/gsea/msigdb/cards/PID_IL12_STAT4_PATHWAY	-0.26843	-0.79298	0.7406	0.91112	1	0.276	0.155	0.234	0.9134	0.17
c2_cp_v5	REACTOME_INTRINSIC_PATHWAY_FOR_APOPTOSIS	29	http://www.broadinstitute.org/gsea/msigdb/cards/REACTOME_INTRINSIC_PATHWAY_FOR_APOPTOSIS	-0.26182	-0.7827	0.7297	0.91183	1	0.241	0.19	0.196	0.91604	0.154
c2_cp_v5	KEGG_TIGHT_JUNCTION	102	http://www.broadinstitute.org/gsea/msigdb/cards/KEGG_TIGHT_JUNCTION	-0.19539	-0.77318	0.8374	0.91334	1	0.245	0.215	0.194	0.91882	0.146
c2_cp_v5	BIOCARTA_AGR_PATHWAY	28	http://www.broadinstitute.org/gsea/msigdb/cards/BIOCARTA_AGR_PATHWAY	-0.25203	-0.77462	0.7915	0.91364	1	0.107	0.0576	0.101	0.91974	0.145
c2_cp_v5	KEGG_SMALL_CELL_LUNG_CANCER	78	http://www.broadinstitute.org/gsea/msigdb/cards/KEGG_SMALL_CELL_LUNG_CANCER	-0.214	-0.77097	0.8027	0.91413	1	0.218	0.199	0.176	0.9195	0.142
c6_all_v5	RPS14_DN.V1_DN	147	http://www.broadinstitute.org/gsea/msigdb/cards/RPS14_DN.V1_DN	-0.25592	-1.0246	0.4071	0.91473	1	0.381	0.299	0.27	0.90568	0.376
c6_all_v5	KRAS.600.LUNG.BREAST_UP.V1_DN	161	http://www.broadinstitute.org/gsea/msigdb/cards/KRAS.600.LUNG.BREAST_UP.V1_DN	0.21624	0.93733	0.5909	0.9157	1	0.317	0.237	0.245	0.92971	0.353
h_all_v5	HALLMARK_APICAL_SURFACE	31	http://www.broadinstitute.org/gsea/msigdb/cards/HALLMARK_APICAL_SURFACE	-0.21299	-0.68026	0.9461	0.92191	1	0.129	0.108	0.115	0.9324	0.091
h_all_v5	HALLMARK_WNT_BETA_CATENIN_SIGNALING	38	http://www.broadinstitute.org/gsea/msigdb/cards/HALLMARK_WNT_BETA_CATENIN_SIGNALING	0.21692	0.74878	0.8753	0.92707	0.999	0.211	0.153	0.179	0.95238	0.338
c6_all_v5	P53_DN.V2_DN	95	http://www.broadinstitute.org/gsea/msigdb/cards/P53_DN.V2_DN	-0.24555	-0.97559	0.5088	0.92811	1	0.211	0.157	0.179	0.92878	0.395
c6_all_v5	MTOR_UP.N4.V1_DN	147	http://www.broadinstitute.org/gsea/msigdb/cards/MTOR_UP.N4.V1_DN	0.25977	0.98459	0.4702	0.9292	1	0.367	0.258	0.276	0.93809	0.401
c2_cp_v5	PID_ERA_GENOMIC_PATHWAY	56	http://www.broadinstitute.org/gsea/msigdb/cards/PID_ERA_GENOMIC_PATHWAY	-0.18933	-0.75665	0.8779	0.93315	1	0.357	0.296	0.253	0.93872	0.194
c6_all_v5	ATM_DN.V1_DN	73	http://www.broadinstitute.org/gsea/msigdb/cards/ATM_DN.V1_DN	-0.26724	-0.97057	0.5468	0.93315	1	0.192	0.114	0.171	0.93381	0.399
c6_all_v5	STK33_NOMO_DN	224	http://www.broadinstitute.org/gsea/msigdb/cards/STK33_NOMO_DN	-0.20329	-0.86165	0.7843	0.93337	1	0.263	0.229	0.207	0.9456	0.342
c6_all_v5	BMI1_DN.V1_DN	104	http://www.broadinstitute.org/gsea/msigdb/cards/BMI1_DN.V1_DN	-0.22941	-0.86482	0.7161	0.9335	1	0.24	0.215	0.19	0.94473	0.353
c2_cp_v5	REACTOME_TRANSPORT_OF_RIBONUCLEOPROTEINS_INTO_THE_HOST_NUCLEUS	27	http://www.broadinstitute.org/gsea/msigdb/cards/REACTOME_TRANSPORT_OF_RIBONUCLEOPROTEINS_INTO_THE_HOST_NUCLEUS	-0.2431	-0.75269	0.7221	0.93412	1	0.259	0.252	0.194	0.93872	0.196
c6_all_v5	MEL18_DN.V1_DN	107	http://www.broadinstitute.org/gsea/msigdb/cards/MEL18_DN.V1_DN	0.23683	0.94234	0.5841	0.93412	1	0.224	0.135	0.196	0.95053	0.397
c2_cp_v5	PID_CMYB_PATHWAY	73	http://www.broadinstitute.org/gsea/msigdb/cards/PID_CMYB_PATHWAY	-0.1993	-0.7538	0.876	0.93509	1	0.274	0.246	0.208	0.94063	0.199
h_all_v5	HALLMARK_INTERFERON_ALPHA_RESPONSE	93	http://www.broadinstitute.org/gsea/msigdb/cards/HALLMARK_INTERFERON_ALPHA_RESPONSE	-0.21325	-0.6381	0.8597	0.93531	1	0.258	0.236	0.199	0.94444	0.171
c6_all_v5	KRAS.AMP.LUNG_UP.V1_DN	84	http://www.broadinstitute.org/gsea/msigdb/cards/KRAS.AMP.LUNG_UP.V1_DN	-0.22658	-0.84647	0.7629	0.93555	1	0.286	0.249	0.216	0.94825	0.34
c6_all_v5	CTIP_DN.V1_UP	71	http://www.broadinstitute.org/gsea/msigdb/cards/CTIP_DN.V1_UP	-0.25628	-0.91653	0.6212	0.93654	1	0.38	0.276	0.277	0.93668	0.389
c2_cp_v5	REACTOME_ACTIVATION_OF_NF_KAPPAB_IN_B_CELLS	58	http://www.broadinstitute.org/gsea/msigdb/cards/REACTOME_ACTIVATION_OF_NF_KAPPAB_IN_B_CELLS	-0.49731	-1.5161	0.1087	0.93659	0.976	0.655	0.328	0.442	0.61974	0.306
c6_all_v5	KRAS.DF.V1_DN	135	http://www.broadinstitute.org/gsea/msigdb/cards/KRAS.DF.V1_DN	-0.20948	-0.86694	0.7792	0.937	1	0.215	0.178	0.178	0.94751	0.366
c6_all_v5	AKT_UP.V1_DN	140	http://www.broadinstitute.org/gsea/msigdb/cards/AKT_UP.V1_DN	-0.24711	-0.97652	0.5151	0.93747	1	0.35	0.282	0.254	0.93539	0.412
c6_all_v5	KRAS.PROSTATE_UP.V1_UP	84	http://www.broadinstitute.org/gsea/msigdb/cards/KRAS.PROSTATE_UP.V1_UP	-0.23896	-0.8805	0.6954	0.93833	1	0.226	0.189	0.185	0.94973	0.381
c2_cp_v5	PID_PDGFRB_PATHWAY	128	http://www.broadinstitute.org/gsea/msigdb/cards/PID_PDGFRB_PATHWAY	-0.17281	-0.71274	0.8487	0.93917	1	0.266	0.266	0.197	0.94567	0.151
c2_cp_v5	KEGG_PROPANOATE_METABOLISM	28	http://www.broadinstitute.org/gsea/msigdb/cards/KEGG_PROPANOATE_METABOLISM	-0.25218	-0.71681	0.8532	0.93925	1	0.321	0.225	0.25	0.94515	0.152
c2_cp_v5	BIOCARTA_TOLL_PATHWAY	33	http://www.broadinstitute.org/gsea/msigdb/cards/BIOCARTA_TOLL_PATHWAY	-0.20006	-0.71884	0.8648	0.93934	1	0.364	0.318	0.249	0.94555	0.163
c6_all_v5	KRAS.BREAST_UP.V1_DN	79	http://www.broadinstitute.org/gsea/msigdb/cards/KRAS.BREAST_UP.V1_DN	-0.23367	-0.88364	0.6777	0.93936	1	0.215	0.16	0.182	0.94866	0.381
c2_cp_v5	KEGG_NOTCH_SIGNALING_PATHWAY	42	http://www.broadinstitute.org/gsea/msigdb/cards/KEGG_NOTCH_SIGNALING_PATHWAY	-0.19628	-0.71458	0.9357	0.93941	1	0.31	0.245	0.234	0.94644	0.15
c2_cp_v5	PID_MTOR_4PATHWAY	68	http://www.broadinstitute.org/gsea/msigdb/cards/PID_MTOR_4PATHWAY	-0.16126	-0.74124	0.8764	0.93994	1	0.265	0.253	0.199	0.9462	0.206
c2_cp_v5	KEGG_THYROID_CANCER	25	http://www.broadinstitute.org/gsea/msigdb/cards/KEGG_THYROID_CANCER	-0.22264	-0.74656	0.8673	0.94048	1	0.36	0.294	0.255	0.94608	0.216
c6_all_v5	BRCA1_DN.V1_DN	89	http://www.broadinstitute.org/gsea/msigdb/cards/BRCA1_DN.V1_DN	-0.23323	-0.85523	0.6966	0.94055	1	0.315	0.248	0.238	0.9516	0.364
c2_cp_v5	KEGG_LEUKOCYTE_TRANSENDOTHELIAL_MIGRATION	94	http://www.broadinstitute.org/gsea/msigdb/cards/KEGG_LEUKOCYTE_TRANSENDOTHELIAL_MIGRATION	-0.18683	-0.71977	0.8947	0.94061	1	0.234	0.197	0.189	0.94622	0.172
c6_all_v5	CRX_DN.V1_DN	98	http://www.broadinstitute.org/gsea/msigdb/cards/CRX_DN.V1_DN	-0.25307	-0.96092	0.5327	0.94089	1	0.367	0.254	0.276	0.93985	0.414
c2_cp_v5	KEGG_OOCYTE_MEIOSIS	92	http://www.broadinstitute.org/gsea/msigdb/cards/KEGG_OOCYTE_MEIOSIS	-0.1795	-0.7212	0.8333	0.94127	1	0.185	0.171	0.154	0.94701	0.177
c2_cp_v5	KEGG_T_CELL_RECEPTOR_SIGNALING_PATHWAY	98	http://www.broadinstitute.org/gsea/msigdb/cards/KEGG_T_CELL_RECEPTOR_SIGNALING_PATHWAY	-0.19965	-0.73833	0.8155	0.94162	1	0.194	0.169	0.162	0.94798	0.205
c2_cp_v5	REACTOME_PLATELET_AGGREGATION_PLUG_FORMATION	31	http://www.broadinstitute.org/gsea/msigdb/cards/REACTOME_PLATELET_AGGREGATION_PLUG_FORMATION	-0.25096	-0.74181	0.7718	0.9419	1	0.355	0.273	0.259	0.94763	0.214
c6_all_v5	IL21_UP.V1_DN	88	http://www.broadinstitute.org/gsea/msigdb/cards/IL21_UP.V1_DN	-0.23346	-0.84727	0.7851	0.94197	1	0.193	0.14	0.167	0.95464	0.367
c6_all_v5	EGFR_UP.V1_UP	165	http://www.broadinstitute.org/gsea/msigdb/cards/EGFR_UP.V1_UP	-0.21721	-0.84046	0.775	0.942	1	0.242	0.207	0.195	0.95455	0.361
c6_all_v5	KRAS.600_UP.V1_DN	140	http://www.broadinstitute.org/gsea/msigdb/cards/KRAS.600_UP.V1_DN	0.21142	0.88137	0.7327	0.94217	1	0.264	0.182	0.218	0.9621	0.403
c2_cp_v5	REACTOME_SIGNALLING_TO_ERKS	31	http://www.broadinstitute.org/gsea/msigdb/cards/REACTOME_SIGNALLING_TO_ERKS	-0.20637	-0.73208	0.8482	0.94242	1	0.0968	0.0669	0.0905	0.94724	0.202
c2_cp_v5	PID_VEGFR1_PATHWAY	26	http://www.broadinstitute.org/gsea/msigdb/cards/PID_VEGFR1_PATHWAY	-0.22742	-0.70779	0.8671	0.94296	1	0.115	0.0901	0.105	0.94847	0.154
c2_cp_v5	PID_P53_DOWNSTREAM_PATHWAY	123	http://www.broadinstitute.org/gsea/msigdb/cards/PID_P53_DOWNSTREAM_PATHWAY	-0.18071	-0.74292	0.9064	0.94305	1	0.26	0.241	0.199	0.94909	0.223
c6_all_v5	GLI1_UP.V1_UP	25	http://www.broadinstitute.org/gsea/msigdb/cards/GLI1_UP.V1_UP	-0.2355	-0.83592	0.7491	0.94332	1	0.16	0.103	0.144	0.95432	0.358
c2_cp_v5	KEGG_CALCIUM_SIGNALING_PATHWAY	102	http://www.broadinstitute.org/gsea/msigdb/cards/KEGG_CALCIUM_SIGNALING_PATHWAY	-0.1866	-0.72154	0.9169	0.94341	1	0.245	0.212	0.195	0.94911	0.19
c2_cp_v5	KEGG_PRIMARY_IMMUNODEFICIENCY	33	http://www.broadinstitute.org/gsea/msigdb/cards/KEGG_PRIMARY_IMMUNODEFICIENCY	-0.23256	-0.72926	0.8514	0.94354	1	0.121	0.0765	0.112	0.94942	0.202
c2_cp_v5	BIOCARTA_FAS_PATHWAY	30	http://www.broadinstitute.org/gsea/msigdb/cards/BIOCARTA_FAS_PATHWAY	-0.20651	-0.72709	0.8376	0.9439	1	0.267	0.241	0.203	0.95006	0.198
c2_cp_v5	PID_SHP2_PATHWAY	48	http://www.broadinstitute.org/gsea/msigdb/cards/PID_SHP2_PATHWAY	-0.20277	-0.70491	0.9069	0.94413	1	0.167	0.133	0.145	0.95024	0.155
c2_cp_v5	KEGG_FOCAL_ADHESION	175	http://www.broadinstitute.org/gsea/msigdb/cards/KEGG_FOCAL_ADHESION	-0.19044	-0.73257	0.8822	0.94443	1	0.24	0.227	0.188	0.94971	0.21
c2_cp_v5	KEGG_SPHINGOLIPID_METABOLISM	33	http://www.broadinstitute.org/gsea/msigdb/cards/KEGG_SPHINGOLIPID_METABOLISM	-0.23216	-0.69782	0.8637	0.94477	1	0.242	0.205	0.193	0.95112	0.155
c6_all_v5	KRAS.300_UP.V1_DN	76	http://www.broadinstitute.org/gsea/msigdb/cards/KRAS.300_UP.V1_DN	-0.26495	-0.91022	0.6062	0.94492	1	0.171	0.0987	0.155	0.95341	0.409
c2_cp_v5	BIOCARTA_IL2RB_PATHWAY	38	http://www.broadinstitute.org/gsea/msigdb/cards/BIOCARTA_IL2RB_PATHWAY	-0.20059	-0.72222	0.8643	0.94517	1	0.0526	0.00262	0.0526	0.95112	0.201
c2_cp_v5	KEGG_TRYPTOPHAN_METABOLISM	28	http://www.broadinstitute.org/gsea/msigdb/cards/KEGG_TRYPTOPHAN_METABOLISM	-0.23893	-0.69524	0.8597	0.94527	1	0.286	0.225	0.222	0.95235	0.151
c6_all_v5	PRC2_EZH2_UP.V1_DN	136	http://www.broadinstitute.org/gsea/msigdb/cards/PRC2_EZH2_UP.V1_DN	-0.24652	-0.91696	0.5933	0.94569	1	0.199	0.143	0.172	0.94703	0.41
c2_cp_v5	PID_ANGIOPOIETIN_RECEPTOR_PATHWAY	44	http://www.broadinstitute.org/gsea/msigdb/cards/PID_ANGIOPOIETIN_RECEPTOR_PATHWAY	-0.21827	-0.72371	0.8221	0.94582	1	0.25	0.208	0.199	0.95133	0.206
c6_all_v5	VEGF_A_UP.V1_UP	147	http://www.broadinstitute.org/gsea/msigdb/cards/VEGF_A_UP.V1_UP	-0.2516	-0.96299	0.5222	0.946	1	0.388	0.294	0.277	0.94877	0.415
c6_all_v5	PRC1_BMI_UP.V1_UP	96	http://www.broadinstitute.org/gsea/msigdb/cards/PRC1_BMI_UP.V1_UP	-0.22677	-0.92042	0.6716	0.946	1	0.26	0.192	0.212	0.94803	0.414
c2_cp_v5	PID_EPHRINB_REV_PATHWAY	30	http://www.broadinstitute.org/gsea/msigdb/cards/PID_EPHRINB_REV_PATHWAY	-0.23648	-0.69897	0.8701	0.94601	1	0.333	0.243	0.253	0.9521	0.16
c6_all_v5	GCNP_SHH_UP_EARLY.V1_DN	129	http://www.broadinstitute.org/gsea/msigdb/cards/GCNP_SHH_UP_EARLY.V1_DN	-0.21213	-0.86702	0.7376	0.94603	1	0.279	0.216	0.221	0.9568	0.393
c6_all_v5	TGFB_UP.V1_DN	144	http://www.broadinstitute.org/gsea/msigdb/cards/TGFB_UP.V1_DN	-0.21764	-0.88482	0.6769	0.94608	1	0.299	0.243	0.228	0.9558	0.403
c2_cp_v5	KEGG_NEUROACTIVE_LIGAND_RECEPTOR_INTERACTION	98	http://www.broadinstitute.org/gsea/msigdb/cards/KEGG_NEUROACTIVE_LIGAND_RECEPTOR_INTERACTION	-0.20584	-0.73295	0.9059	0.94656	1	0.265	0.235	0.204	0.95206	0.224
c6_all_v5	TGFB_UP.V1_UP	142	http://www.broadinstitute.org/gsea/msigdb/cards/TGFB_UP.V1_UP	-0.24472	-0.90264	0.605	0.94668	1	0.218	0.173	0.183	0.9568	0.41
c6_all_v5	E2F3_UP.V1_DN	90	http://www.broadinstitute.org/gsea/msigdb/cards/E2F3_UP.V1_DN	-0.20828	-0.84881	0.7649	0.94718	1	0.333	0.271	0.245	0.95848	0.384
c6_all_v5	AKT_UP.V1_UP	129	http://www.broadinstitute.org/gsea/msigdb/cards/AKT_UP.V1_UP	-0.24181	-0.9234	0.5849	0.94806	1	0.287	0.233	0.222	0.95407	0.417
c2_cp_v5	REACTOME_MHC_CLASS_II_ANTIGEN_PRESENTATION	73	http://www.broadinstitute.org/gsea/msigdb/cards/REACTOME_MHC_CLASS_II_ANTIGEN_PRESENTATION	-0.15293	-0.69904	0.912	0.9485	1	0.192	0.214	0.152	0.95467	0.179
c6_all_v5	CSR_EARLY_UP.V1_UP	141	http://www.broadinstitute.org/gsea/msigdb/cards/CSR_EARLY_UP.V1_UP	-0.19792	-0.86922	0.6518	0.94949	1	0.255	0.258	0.192	0.96202	0.402
c6_all_v5	ATF2_S_UP.V1_UP	112	http://www.broadinstitute.org/gsea/msigdb/cards/ATF2_S_UP.V1_UP	-0.24255	-0.97685	0.5071	0.94951	1	0.33	0.232	0.256	0.94857	0.428
c6_all_v5	TBK1.DF_DN	255	http://www.broadinstitute.org/gsea/msigdb/cards/TBK1.DF_DN	0.18624	0.7697	0.7479	0.94965	1	0.329	0.281	0.241	0.96549	0.281
c6_all_v5	PIGF_UP.V1_DN	122	http://www.broadinstitute.org/gsea/msigdb/cards/PIGF_UP.V1_DN	0.21376	0.86832	0.6648	0.95035	1	0.18	0.13	0.158	0.97422	0.429
c6_all_v5	GCNP_SHH_UP_LATE.V1_UP	160	http://www.broadinstitute.org/gsea/msigdb/cards/GCNP_SHH_UP_LATE.V1_UP	-0.22488	-0.88677	0.6067	0.95076	1	0.244	0.216	0.193	0.95943	0.411
c6_all_v5	KRAS.PROSTATE_UP.V1_DN	70	http://www.broadinstitute.org/gsea/msigdb/cards/KRAS.PROSTATE_UP.V1_DN	-0.25786	-0.89396	0.6511	0.95088	1	0.157	0.0651	0.148	0.95749	0.42
c2_cp_v5	KEGG_FC_GAMMA_R_MEDIATED_PHAGOCYTOSIS	90	http://www.broadinstitute.org/gsea/msigdb/cards/KEGG_FC_GAMMA_R_MEDIATED_PHAGOCYTOSIS	-0.18057	-0.68776	0.8781	0.95098	1	0.178	0.192	0.145	0.95744	0.175
c2_cp_v5	PID_NEPHRIN_NEPH1_PATHWAY	29	http://www.broadinstitute.org/gsea/msigdb/cards/PID_NEPHRIN_NEPH1_PATHWAY	-0.20062	-0.66292	0.921	0.95182	1	0.552	0.413	0.325	0.959	0.123
c6_all_v5	RELA_DN.V1_DN	73	http://www.broadinstitute.org/gsea/msigdb/cards/RELA_DN.V1_DN	-0.2567	-0.90437	0.6605	0.95196	1	0.329	0.253	0.247	0.95964	0.422
c2_cp_v5	PID_P73PATHWAY	68	http://www.broadinstitute.org/gsea/msigdb/cards/PID_P73PATHWAY	-0.19308	-0.67659	0.9096	0.95266	1	0.368	0.323	0.25	0.96033	0.165
c6_all_v5	LEF1_UP.V1_DN	140	http://www.broadinstitute.org/gsea/msigdb/cards/LEF1_UP.V1_DN	-0.23755	-0.92891	0.6084	0.9529	1	0.286	0.224	0.224	0.95936	0.424
c2_cp_v5	PID_INTEGRIN_A4B1_PATHWAY	32	http://www.broadinstitute.org/gsea/msigdb/cards/PID_INTEGRIN_A4B1_PATHWAY	-0.21854	-0.67833	0.8935	0.95344	1	0.281	0.233	0.216	0.96129	0.17
c2_cp_v5	KEGG_GLYCEROLIPID_METABOLISM	37	http://www.broadinstitute.org/gsea/msigdb/cards/KEGG_GLYCEROLIPID_METABOLISM	-0.20669	-0.67345	0.966	0.95351	1	0.216	0.167	0.181	0.95978	0.167
c6_all_v5	JNK_DN.V1_DN	126	http://www.broadinstitute.org/gsea/msigdb/cards/JNK_DN.V1_DN	0.19367	0.88793	0.7457	0.95362	1	0.175	0.128	0.154	0.97097	0.437
c6_all_v5	SIRNA_EIF4GI_UP	81	http://www.broadinstitute.org/gsea/msigdb/cards/SIRNA_EIF4GI_UP	-0.23282	-0.89671	0.5825	0.95381	1	0.309	0.233	0.238	0.96245	0.421
c2_cp_v5	BIOCARTA_GPCR_PATHWAY	31	http://www.broadinstitute.org/gsea/msigdb/cards/BIOCARTA_GPCR_PATHWAY	-0.18485	-0.66564	0.9383	0.95409	1	0.226	0.176	0.187	0.96017	0.145
c2_cp_v5	REACTOME_THE_ROLE_OF_NEF_IN_HIV1_REPLICATION_AND_DISEASE_PATHOGENESIS	26	http://www.broadinstitute.org/gsea/msigdb/cards/REACTOME_THE_ROLE_OF_NEF_IN_HIV1_REPLICATION_AND_DISEASE_PATHOGENESIS	-0.19762	-0.66316	0.894	0.95409	1	0.231	0.214	0.182	0.96093	0.147
c2_cp_v5	PID_EPHB_FWD_PATHWAY	36	http://www.broadinstitute.org/gsea/msigdb/cards/PID_EPHB_FWD_PATHWAY	-0.19548	-0.67964	0.922	0.95461	1	0.111	0.0576	0.105	0.96244	0.185
c2_cp_v5	REACTOME_GLUCOSE_METABOLISM	54	http://www.broadinstitute.org/gsea/msigdb/cards/REACTOME_GLUCOSE_METABOLISM	-0.18136	-0.68185	0.9	0.95471	1	0.222	0.192	0.18	0.96268	0.187
c2_cp_v5	PID_RAS_PATHWAY	30	http://www.broadinstitute.org/gsea/msigdb/cards/PID_RAS_PATHWAY	-0.20714	-0.66734	0.9442	0.95488	1	0.167	0.116	0.148	0.96164	0.16
c2_cp_v5	PID_E2F_PATHWAY	68	http://www.broadinstitute.org/gsea/msigdb/cards/PID_E2F_PATHWAY	-0.21713	-0.66903	0.8244	0.95564	1	0.206	0.175	0.171	0.96173	0.174
c6_all_v5	ATF2_S_UP.V1_DN	139	http://www.broadinstitute.org/gsea/msigdb/cards/ATF2_S_UP.V1_DN	-0.24647	-0.93136	0.5618	0.95697	1	0.302	0.24	0.232	0.96105	0.428
c2_cp_v5	REACTOME_ANTIVIRAL_MECHANISM_BY_IFN_STIMULATED_GENES	64	http://www.broadinstitute.org/gsea/msigdb/cards/REACTOME_ANTIVIRAL_MECHANISM_BY_IFN_STIMULATED_GENES	-0.17614	-0.65436	0.8748	0.95735	1	0.297	0.322	0.202	0.96239	0.145
c2_cp_v5	PID_FAS_PATHWAY	37	http://www.broadinstitute.org/gsea/msigdb/cards/PID_FAS_PATHWAY	0.19243	0.6548	0.9053	0.95741	1	0.324	0.266	0.239	0.96721	0.211
c6_all_v5	JNK_DN.V1_UP	107	http://www.broadinstitute.org/gsea/msigdb/cards/JNK_DN.V1_UP	-0.22182	-0.86973	0.7426	0.95762	1	0.308	0.269	0.227	0.96889	0.425
c2_cp_v5	REACTOME_MEIOTIC_RECOMBINATION	25	http://www.broadinstitute.org/gsea/msigdb/cards/REACTOME_MEIOTIC_RECOMBINATION	-0.21294	-0.64847	0.8642	0.95771	1	0.32	0.254	0.239	0.96321	0.128
c6_all_v5	BCAT.100_UP.V1_UP	32	http://www.broadinstitute.org/gsea/msigdb/cards/BCAT.100_UP.V1_UP	-0.29707	-0.92387	0.6103	0.95776	1	0.25	0.135	0.217	0.96207	0.43
c6_all_v5	BCAT_GDS748_UP	35	http://www.broadinstitute.org/gsea/msigdb/cards/BCAT_GDS748_UP	-0.26243	-0.88774	0.6942	0.95793	1	0.314	0.205	0.25	0.96573	0.43
c2_cp_v5	KEGG_HYPERTROPHIC_CARDIOMYOPATHY_HCM	55	http://www.broadinstitute.org/gsea/msigdb/cards/KEGG_HYPERTROPHIC_CARDIOMYOPATHY_HCM	-0.18393	-0.65104	0.9821	0.95802	1	0.218	0.226	0.17	0.96339	0.144
c2_cp_v5	PID_MAPK_TRK_PATHWAY	32	http://www.broadinstitute.org/gsea/msigdb/cards/PID_MAPK_TRK_PATHWAY	-0.20407	-0.6412	0.9184	0.95882	1	0.312	0.266	0.23	0.96519	0.123
c2_cp_v5	REACTOME_DNA_REPLICATION	178	http://www.broadinstitute.org/gsea/msigdb/cards/REACTOME_DNA_REPLICATION	-0.19381	-0.643	0.8041	0.95987	1	0.337	0.314	0.235	0.96581	0.139
c2_cp_v5	SIG_PIP3_SIGNALING_IN_B_LYMPHOCYTES	32	http://www.broadinstitute.org/gsea/msigdb/cards/SIG_PIP3_SIGNALING_IN_B_LYMPHOCYTES	0.19557	0.65703	0.9132	0.96002	1	0.375	0.265	0.276	0.97047	0.243
c2_cp_v5	REACTOME_CHROMOSOME_MAINTENANCE	73	http://www.broadinstitute.org/gsea/msigdb/cards/REACTOME_CHROMOSOME_MAINTENANCE	0.19391	0.64049	0.8026	0.96008	1	0.274	0.223	0.214	0.97069	0.199
c2_cp_v5	REACTOME_CELL_CYCLE	341	http://www.broadinstitute.org/gsea/msigdb/cards/REACTOME_CELL_CYCLE	-0.15013	-0.59272	0.8864	0.96054	1	0.243	0.254	0.186	0.967	0.036
c2_cp_v5	KEGG_VIRAL_MYOCARDITIS	41	http://www.broadinstitute.org/gsea/msigdb/cards/KEGG_VIRAL_MYOCARDITIS	0.17719	0.64544	0.9864	0.96055	1	0.195	0.175	0.161	0.97071	0.214
c2_cp_v5	PID_TAP63_PATHWAY	45	http://www.broadinstitute.org/gsea/msigdb/cards/PID_TAP63_PATHWAY	-0.16807	-0.58791	0.9825	0.9608	1	0.311	0.28	0.225	0.9671	0.024
c2_cp_v5	REACTOME_SIGNALING_BY_ERBB4	73	http://www.broadinstitute.org/gsea/msigdb/cards/REACTOME_SIGNALING_BY_ERBB4	-0.15609	-0.63544	0.9617	0.96091	1	0.164	0.19	0.134	0.96721	0.125
c2_cp_v5	PID_BCR_5PATHWAY	65	http://www.broadinstitute.org/gsea/msigdb/cards/PID_BCR_5PATHWAY	0.21516	0.81617	0.6737	0.96206	1	0.262	0.22	0.205	0.97251	0.426
c2_cp_v5	KEGG_ARRHYTHMOGENIC_RIGHT_VENTRICULAR_CARDIOMYOPATHY_ARVC	51	http://www.broadinstitute.org/gsea/msigdb/cards/KEGG_ARRHYTHMOGENIC_RIGHT_VENTRICULAR_CARDIOMYOPATHY_ARVC	-0.18217	-0.59425	0.9859	0.96207	1	0.216	0.215	0.17	0.96835	0.047
c2_cp_v5	KEGG_ABC_TRANSPORTERS	29	http://www.broadinstitute.org/gsea/msigdb/cards/KEGG_ABC_TRANSPORTERS	-0.21231	-0.59735	0.943	0.96266	1	0.379	0.309	0.263	0.96942	0.058
c6_all_v5	RAPA_EARLY_UP.V1_DN	139	http://www.broadinstitute.org/gsea/msigdb/cards/RAPA_EARLY_UP.V1_DN	0.17038	0.7772	0.9259	0.96289	1	0.259	0.219	0.204	0.98006	0.394
c2_cp_v5	BIOCARTA_MAPK_PATHWAY	82	http://www.broadinstitute.org/gsea/msigdb/cards/BIOCARTA_MAPK_PATHWAY	0.16261	0.63096	0.9229	0.9629	1	0.317	0.292	0.226	0.97386	0.206
c2_cp_v5	REACTOME_SIGNALING_BY_ROBO_RECEPTOR	25	http://www.broadinstitute.org/gsea/msigdb/cards/REACTOME_SIGNALING_BY_ROBO_RECEPTOR	0.20203	0.65894	0.9422	0.96299	1	0.36	0.286	0.257	0.97378	0.267
c2_cp_v5	PID_IL2_STAT5_PATHWAY	27	http://www.broadinstitute.org/gsea/msigdb/cards/PID_IL2_STAT5_PATHWAY	0.2566	0.81264	0.7156	0.96312	1	0.444	0.254	0.332	0.97381	0.435
c2_cp_v5	BIOCARTA_BIOPEPTIDES_PATHWAY	38	http://www.broadinstitute.org/gsea/msigdb/cards/BIOCARTA_BIOPEPTIDES_PATHWAY	0.1765	0.68262	0.937	0.96315	1	0.289	0.236	0.222	0.97387	0.3
c6_all_v5	PRC2_EDD_UP.V1_UP	166	http://www.broadinstitute.org/gsea/msigdb/cards/PRC2_EDD_UP.V1_UP	0.1988	0.9147	0.6028	0.96327	1	0.253	0.216	0.201	0.97932	0.455
c6_all_v5	KRAS.KIDNEY_UP.V1_DN	71	http://www.broadinstitute.org/gsea/msigdb/cards/KRAS.KIDNEY_UP.V1_DN	-0.26896	-0.93294	0.5856	0.96331	1	0.225	0.175	0.187	0.96863	0.442
c2_cp_v5	PID_FOXM1_PATHWAY	38	http://www.broadinstitute.org/gsea/msigdb/cards/PID_FOXM1_PATHWAY	0.20789	0.66356	0.8989	0.96343	1	0.184	0.132	0.16	0.97426	0.277
c2_cp_v5	REACTOME_TCR_SIGNALING	44	http://www.broadinstitute.org/gsea/msigdb/cards/REACTOME_TCR_SIGNALING	-0.18919	-0.59955	0.9052	0.96374	1	0.227	0.213	0.179	0.97032	0.072
c6_all_v5	IL2_UP.V1_DN	120	http://www.broadinstitute.org/gsea/msigdb/cards/IL2_UP.V1_DN	0.19702	0.80508	0.8315	0.96379	1	0.233	0.177	0.194	0.98057	0.417
c6_all_v5	PDGF_UP.V1_DN	72	http://www.broadinstitute.org/gsea/msigdb/cards/PDGF_UP.V1_DN	-0.20454	-0.72622	0.9052	0.96399	1	0.347	0.301	0.244	0.97424	0.275
c2_cp_v5	PID_CD8_TCR_DOWNSTREAM_PATHWAY	50	http://www.broadinstitute.org/gsea/msigdb/cards/PID_CD8_TCR_DOWNSTREAM_PATHWAY	-0.17853	-0.61764	0.9319	0.96411	1	0.38	0.327	0.257	0.97092	0.119
c2_cp_v5	REACTOME_ACTIVATION_OF_THE_PRE_REPLICATIVE_COMPLEX	30	http://www.broadinstitute.org/gsea/msigdb/cards/REACTOME_ACTIVATION_OF_THE_PRE_REPLICATIVE_COMPLEX	-0.233	-0.60239	0.8129	0.96448	1	0.433	0.357	0.279	0.9714	0.085
c2_cp_v5	KEGG_LYSINE_DEGRADATION	43	http://www.broadinstitute.org/gsea/msigdb/cards/KEGG_LYSINE_DEGRADATION	-0.16788	-0.57008	0.9728	0.96462	1	0.163	0.167	0.136	0.97087	0.022
c2_cp_v5	PID_IFNG_PATHWAY	39	http://www.broadinstitute.org/gsea/msigdb/cards/PID_IFNG_PATHWAY	-0.17911	-0.60586	0.9631	0.96469	1	0.333	0.294	0.236	0.97153	0.097
c2_cp_v5	REACTOME_TRANSCRIPTIONAL_ACTIVITY_OF_SMAD2_SMAD3_SMAD4_HETEROTRIMER	35	http://www.broadinstitute.org/gsea/msigdb/cards/REACTOME_TRANSCRIPTIONAL_ACTIVITY_OF_SMAD2_SMAD3_SMAD4_HETEROTRIMER	-0.19039	-0.60955	0.904	0.96474	1	0.229	0.175	0.189	0.97167	0.107
c2_cp_v5	REACTOME_MITOTIC_M_M_G1_PHASES	159	http://www.broadinstitute.org/gsea/msigdb/cards/REACTOME_MITOTIC_M_M_G1_PHASES	-0.1832	-0.62021	0.8187	0.96494	1	0.327	0.313	0.227	0.97175	0.131
c2_cp_v5	PID_SMAD2_3NUCLEAR_PATHWAY	69	http://www.broadinstitute.org/gsea/msigdb/cards/PID_SMAD2_3NUCLEAR_PATHWAY	0.17201	0.6146	0.956	0.96531	1	0.377	0.292	0.268	0.97622	0.193
c2_cp_v5	REACTOME_INTEGRIN_ALPHAIIB_BETA3_SIGNALING	26	http://www.broadinstitute.org/gsea/msigdb/cards/REACTOME_INTEGRIN_ALPHAIIB_BETA3_SIGNALING	-0.20297	-0.62326	0.9366	0.96532	1	0.308	0.266	0.226	0.97234	0.144
c2_cp_v5	BIOCARTA_PPARA_PATHWAY	52	http://www.broadinstitute.org/gsea/msigdb/cards/BIOCARTA_PPARA_PATHWAY	-0.16142	-0.61216	0.9894	0.96538	1	0.288	0.256	0.215	0.97256	0.121
c6_all_v5	CORDENONSI_YAP_CONSERVED_SIGNATURE	50	http://www.broadinstitute.org/gsea/msigdb/cards/CORDENONSI_YAP_CONSERVED_SIGNATURE	-0.27656	-0.93601	0.5524	0.9654	1	0.24	0.171	0.2	0.96815	0.444
c2_cp_v5	REACTOME_CELL_CYCLE_MITOTIC	295	http://www.broadinstitute.org/gsea/msigdb/cards/REACTOME_CELL_CYCLE_MITOTIC	-0.16548	-0.62581	0.8577	0.96584	1	0.247	0.254	0.189	0.97308	0.154
c2_cp_v5	REACTOME_SIGNALING_BY_TGF_BETA_RECEPTOR_COMPLEX	59	http://www.broadinstitute.org/gsea/msigdb/cards/REACTOME_SIGNALING_BY_TGF_BETA_RECEPTOR_COMPLEX	-0.15499	-0.57239	0.967	0.96595	1	0.203	0.181	0.167	0.97208	0.034
c6_all_v5	IL15_UP.V1_DN	105	http://www.broadinstitute.org/gsea/msigdb/cards/IL15_UP.V1_DN	-0.22337	-0.82193	0.814	0.96643	1	0.248	0.189	0.203	0.98038	0.432
c2_cp_v5	KEGG_RENAL_CELL_CARCINOMA	64	http://www.broadinstitute.org/gsea/msigdb/cards/KEGG_RENAL_CELL_CARCINOMA	0.16091	0.61969	0.9534	0.96647	1	0.219	0.195	0.177	0.97778	0.223
c2_cp_v5	REACTOME_MRNA_3_END_PROCESSING	33	http://www.broadinstitute.org/gsea/msigdb/cards/REACTOME_MRNA_3_END_PROCESSING	0.13544	0.56228	0.946	0.96648	1	0.121	0.172	0.101	0.97452	0.08
c6_all_v5	MYC_UP.V1_DN	107	http://www.broadinstitute.org/gsea/msigdb/cards/MYC_UP.V1_DN	0.22769	0.98686	0.5095	0.9665	1	0.196	0.105	0.177	0.97342	0.468
c6_all_v5	ALK_DN.V1_DN	74	http://www.broadinstitute.org/gsea/msigdb/cards/ALK_DN.V1_DN	0.20516	0.79043	0.8766	0.96652	1	0.162	0.145	0.139	0.98398	0.413
c2_cp_v5	REACTOME_MAP_KINASE_ACTIVATION_IN_TLR_CASCADE	47	http://www.broadinstitute.org/gsea/msigdb/cards/REACTOME_MAP_KINASE_ACTIVATION_IN_TLR_CASCADE	0.17385	0.66504	0.929	0.96674	1	0.34	0.292	0.242	0.9772	0.308
c2_cp_v5	KEGG_APOPTOSIS	77	http://www.broadinstitute.org/gsea/msigdb/cards/KEGG_APOPTOSIS	0.19159	0.81993	0.8027	0.96689	1	0.234	0.195	0.189	0.9762	0.442
c2_cp_v5	REACTOME_SIGNALING_BY_EGFR_IN_CANCER	99	http://www.broadinstitute.org/gsea/msigdb/cards/REACTOME_SIGNALING_BY_EGFR_IN_CANCER	0.18664	0.81673	0.7805	0.96704	1	0.263	0.22	0.206	0.97666	0.44
c2_cp_v5	PID_IL2_1PATHWAY	54	http://www.broadinstitute.org/gsea/msigdb/cards/PID_IL2_1PATHWAY	0.16426	0.60426	0.9634	0.96726	1	0.333	0.258	0.248	0.97844	0.187
c2_cp_v5	KEGG_SNARE_INTERACTIONS_IN_VESICULAR_TRANSPORT	35	http://www.broadinstitute.org/gsea/msigdb/cards/KEGG_SNARE_INTERACTIONS_IN_VESICULAR_TRANSPORT	0.20266	0.6831	0.8326	0.96747	1	0.114	0.0585	0.108	0.97859	0.337
c2_cp_v5	PID_ERBB2_ERBB3_PATHWAY	42	http://www.broadinstitute.org/gsea/msigdb/cards/PID_ERBB2_ERBB3_PATHWAY	0.16076	0.56853	0.9619	0.9681	1	0.238	0.219	0.187	0.97696	0.128
c2_cp_v5	PID_TELOMERASE_PATHWAY	66	http://www.broadinstitute.org/gsea/msigdb/cards/PID_TELOMERASE_PATHWAY	0.1407	0.58628	0.9791	0.96828	1	0.227	0.223	0.178	0.9769	0.173
c2_cp_v5	REACTOME_PRE_NOTCH_EXPRESSION_AND_PROCESSING	36	http://www.broadinstitute.org/gsea/msigdb/cards/REACTOME_PRE_NOTCH_EXPRESSION_AND_PROCESSING	0.21069	0.72644	0.838	0.96931	1	0.139	0.0692	0.13	0.98208	0.394
c2_cp_v5	REACTOME_SIGNALING_BY_INSULIN_RECEPTOR	81	http://www.broadinstitute.org/gsea/msigdb/cards/REACTOME_SIGNALING_BY_INSULIN_RECEPTOR	0.14625	0.6672	0.9712	0.9696	1	0.259	0.228	0.201	0.9795	0.343
c6_all_v5	BCAT_GDS748_DN	37	http://www.broadinstitute.org/gsea/msigdb/cards/BCAT_GDS748_DN	0.34712	1.2377	0.1711	0.96977	0.942	0.622	0.314	0.428	0.89351	0.416
c2_cp_v5	BIOCARTA_BCR_PATHWAY	34	http://www.broadinstitute.org/gsea/msigdb/cards/BIOCARTA_BCR_PATHWAY	0.14977	0.59153	0.9787	0.96998	1	0.235	0.25	0.177	0.97918	0.218
c6_all_v5	JAK2_DN.V1_UP	87	http://www.broadinstitute.org/gsea/msigdb/cards/JAK2_DN.V1_UP	0.24766	0.99702	0.4492	0.97004	1	0.172	0.0971	0.157	0.97727	0.468
c6_all_v5	PDGF_ERK_DN.V1_DN	126	http://www.broadinstitute.org/gsea/msigdb/cards/PDGF_ERK_DN.V1_DN	-0.16891	-0.72731	0.9042	0.97006	1	0.175	0.162	0.148	0.98056	0.351
c2_cp_v5	PID_EPO_PATHWAY	32	http://www.broadinstitute.org/gsea/msigdb/cards/PID_EPO_PATHWAY	0.23821	0.82137	0.7262	0.97026	1	0.406	0.243	0.308	0.98003	0.449
c2_cp_v5	PID_NETRIN_PATHWAY	28	http://www.broadinstitute.org/gsea/msigdb/cards/PID_NETRIN_PATHWAY	0.22412	0.68481	0.8745	0.9706	1	0.286	0.195	0.23	0.98248	0.369
c2_cp_v5	REACTOME_BMAL1_CLOCK_NPAS2_ACTIVATES_CIRCADIAN_EXPRESSION	32	http://www.broadinstitute.org/gsea/msigdb/cards/REACTOME_BMAL1_CLOCK_NPAS2_ACTIVATES_CIRCADIAN_EXPRESSION	0.23519	0.71028	0.8221	0.97065	1	0.312	0.19	0.254	0.98147	0.391
c2_cp_v5	PID_AJDISS_2PATHWAY	38	http://www.broadinstitute.org/gsea/msigdb/cards/PID_AJDISS_2PATHWAY	0.19877	0.70593	0.8825	0.97105	1	0.368	0.286	0.264	0.98265	0.394
c2_cp_v5	REACTOME_INTERFERON_ALPHA_BETA_SIGNALING	44	http://www.broadinstitute.org/gsea/msigdb/cards/REACTOME_INTERFERON_ALPHA_BETA_SIGNALING	0.21203	0.57139	0.9329	0.97116	1	0.182	0.12	0.161	0.97994	0.177
c2_cp_v5	PID_TRAIL_PATHWAY	28	http://www.broadinstitute.org/gsea/msigdb/cards/PID_TRAIL_PATHWAY	0.1859	0.66981	0.9195	0.97177	1	0.964	0.722	0.269	0.98312	0.362
c6_all_v5	E2F1_UP.V1_UP	164	http://www.broadinstitute.org/gsea/msigdb/cards/E2F1_UP.V1_UP	0.18775	0.8268	0.6998	0.97211	1	0.165	0.154	0.141	0.98851	0.464
c2_cp_v5	PID_CDC42_PATHWAY	66	http://www.broadinstitute.org/gsea/msigdb/cards/PID_CDC42_PATHWAY	0.17969	0.71304	0.8667	0.97214	1	0.303	0.24	0.231	0.98363	0.404
c2_cp_v5	PID_IL2_PI3K_PATHWAY	31	http://www.broadinstitute.org/gsea/msigdb/cards/PID_IL2_PI3K_PATHWAY	-0.17463	-0.54605	0.9779	0.97223	1	0.0323	0.00224	0.0323	0.97941	0.032
c2_cp_v5	PID_PI3KCI_AKT_PATHWAY	33	http://www.broadinstitute.org/gsea/msigdb/cards/PID_PI3KCI_AKT_PATHWAY	0.21502	0.68772	0.8009	0.97241	1	0.212	0.178	0.175	0.98276	0.385
c2_cp_v5	KEGG_MTOR_SIGNALING_PATHWAY	48	http://www.broadinstitute.org/gsea/msigdb/cards/KEGG_MTOR_SIGNALING_PATHWAY	0.19112	0.7276	0.8438	0.97282	1	0.312	0.279	0.226	0.98566	0.412
c6_all_v5	CRX_DN.V1_UP	87	http://www.broadinstitute.org/gsea/msigdb/cards/CRX_DN.V1_UP	-0.1946	-0.73044	0.9112	0.97377	1	0.402	0.312	0.278	0.98514	0.379
c6_all_v5	LEF1_UP.V1_UP	136	http://www.broadinstitute.org/gsea/msigdb/cards/LEF1_UP.V1_UP	-0.24193	-0.93698	0.6072	0.97479	1	0.169	0.0987	0.154	0.97771	0.459
c2_cp_v5	REACTOME_NGF_SIGNALLING_VIA_TRKA_FROM_THE_PLASMA_MEMBRANE	121	http://www.broadinstitute.org/gsea/msigdb/cards/REACTOME_NGF_SIGNALLING_VIA_TRKA_FROM_THE_PLASMA_MEMBRANE	0.15491	0.68926	0.9558	0.97561	1	0.24	0.22	0.189	0.98636	0.417
c6_all_v5	PDGF_ERK_DN.V1_UP	105	http://www.broadinstitute.org/gsea/msigdb/cards/PDGF_ERK_DN.V1_UP	-0.21219	-0.94378	0.6056	0.97605	1	0.333	0.283	0.241	0.97711	0.458
c2_cp_v5	REACTOME_PHASE_II_CONJUGATION	38	http://www.broadinstitute.org/gsea/msigdb/cards/REACTOME_PHASE_II_CONJUGATION	0.23698	0.82157	0.7614	0.97606	1	0.184	0.12	0.163	0.98627	0.46
c2_cp_v5	REACTOME_NONSENSE_MEDIATED_DECAY_ENHANCED_BY_THE_EXON_JUNCTION_COMPLEX	26	http://www.broadinstitute.org/gsea/msigdb/cards/REACTOME_NONSENSE_MEDIATED_DECAY_ENHANCED_BY_THE_EXON_JUNCTION_COMPLEX	0.18554	0.72906	0.8392	0.9761	1	0.231	0.213	0.182	0.98965	0.436
h_all_v5	HALLMARK_E2F_TARGETS	197	http://www.broadinstitute.org/gsea/msigdb/cards/HALLMARK_E2F_TARGETS	0.1532	0.49337	0.8918	0.97663	1	0.183	0.194	0.15	1	0.689
c2_cp_v5	BIOCARTA_MET_PATHWAY	37	http://www.broadinstitute.org/gsea/msigdb/cards/BIOCARTA_MET_PATHWAY	0.20398	0.71317	0.8549	0.9771	1	0.324	0.258	0.241	0.98864	0.448
c2_cp_v5	BIOCARTA_EGF_PATHWAY	31	http://www.broadinstitute.org/gsea/msigdb/cards/BIOCARTA_EGF_PATHWAY	-0.14895	-0.51749	0.9861	0.97716	1	0.452	0.394	0.274	0.98299	0.019
c2_cp_v5	PID_NOTCH_PATHWAY	51	http://www.broadinstitute.org/gsea/msigdb/cards/PID_NOTCH_PATHWAY	-0.14455	-0.52187	0.9964	0.9782	1	0.275	0.289	0.196	0.98425	0.052
c6_all_v5	SRC_UP.V1_UP	101	http://www.broadinstitute.org/gsea/msigdb/cards/SRC_UP.V1_UP	0.21542	0.8906	0.679	0.97826	1	0.188	0.147	0.162	0.99682	0.488
c2_cp_v5	REACTOME_CIRCADIAN_CLOCK	45	http://www.broadinstitute.org/gsea/msigdb/cards/REACTOME_CIRCADIAN_CLOCK	0.20412	0.69544	0.8632	0.97866	1	0.289	0.194	0.234	0.98979	0.435
c2_cp_v5	PID_RB_1PATHWAY	55	http://www.broadinstitute.org/gsea/msigdb/cards/PID_RB_1PATHWAY	0.20421	0.69037	0.8351	0.97933	1	0.418	0.299	0.294	0.99021	0.442
c6_all_v5	PTEN_DN.V2_DN	100	http://www.broadinstitute.org/gsea/msigdb/cards/PTEN_DN.V2_DN	-0.17336	-0.69565	0.9718	0.97964	1	0.16	0.162	0.135	0.98917	0.354
c6_all_v5	PTEN_DN.V1_UP	98	http://www.broadinstitute.org/gsea/msigdb/cards/PTEN_DN.V1_UP	-0.20298	-0.73174	0.9394	0.97965	1	0.367	0.285	0.265	0.9918	0.441
c2_cp_v5	REACTOME_G_PROTEIN_BETA_GAMMA_SIGNALLING	25	http://www.broadinstitute.org/gsea/msigdb/cards/REACTOME_G_PROTEIN_BETA_GAMMA_SIGNALLING	0.24744	0.82274	0.75	0.97977	1	0.24	0.193	0.194	0.99111	0.472
c6_all_v5	YAP1_DN	27	http://www.broadinstitute.org/gsea/msigdb/cards/YAP1_DN	-0.23278	-0.74395	0.8362	0.97985	1	0.185	0.121	0.163	0.99298	0.455
c2_cp_v5	REACTOME_CLASS_I_MHC_MEDIATED_ANTIGEN_PROCESSING_PRESENTATION	212	http://www.broadinstitute.org/gsea/msigdb/cards/REACTOME_CLASS_I_MHC_MEDIATED_ANTIGEN_PROCESSING_PRESENTATION	-0.33836	-1.5172	0.05566	0.98016	0.974	0.349	0.258	0.263	0.64859	0.323
c6_all_v5	NRL_DN.V1_UP	95	http://www.broadinstitute.org/gsea/msigdb/cards/NRL_DN.V1_UP	-0.20234	-0.78308	0.8533	0.9804	1	0.221	0.165	0.186	0.9951	0.476
c6_all_v5	RAPA_EARLY_UP.V1_UP	118	http://www.broadinstitute.org/gsea/msigdb/cards/RAPA_EARLY_UP.V1_UP	-0.18177	-0.70265	0.9424	0.9804	1	0.288	0.26	0.215	0.98997	0.388
c2_cp_v5	REACTOME_PI3K_CASCADE	48	http://www.broadinstitute.org/gsea/msigdb/cards/REACTOME_PI3K_CASCADE	0.19066	0.72931	0.8804	0.981	1	0.271	0.195	0.219	0.9944	0.464
c6_all_v5	CAHOY_ASTROCYTIC	63	http://www.broadinstitute.org/gsea/msigdb/cards/CAHOY_ASTROCYTIC	-0.21252	-0.76815	0.8531	0.98193	1	0.111	0.0688	0.104	0.99311	0.461
c2_cp_v5	REACTOME_GPVI_MEDIATED_ACTIVATION_CASCADE	31	http://www.broadinstitute.org/gsea/msigdb/cards/REACTOME_GPVI_MEDIATED_ACTIVATION_CASCADE	0.23589	0.71339	0.7823	0.98203	1	0.258	0.195	0.208	0.99372	0.468
c6_all_v5	CSR_EARLY_UP.V1_DN	128	http://www.broadinstitute.org/gsea/msigdb/cards/CSR_EARLY_UP.V1_DN	0.32444	1.3119	0.07337	0.98246	0.877	0.375	0.241	0.287	0.86607	0.424
c6_all_v5	NRL_DN.V1_DN	99	http://www.broadinstitute.org/gsea/msigdb/cards/NRL_DN.V1_DN	-0.16755	-0.73477	0.9534	0.9837	1	0.182	0.188	0.149	0.99694	0.47
c2_cp_v5	KEGG_PATHOGENIC_ESCHERICHIA_COLI_INFECTION	49	http://www.broadinstitute.org/gsea/msigdb/cards/KEGG_PATHOGENIC_ESCHERICHIA_COLI_INFECTION	0.19645	0.79593	0.7916	0.9841	1	0.143	0.092	0.13	0.99618	0.486
c2_cp_v5	REACTOME_SIGNALLING_BY_NGF	190	http://www.broadinstitute.org/gsea/msigdb/cards/REACTOME_SIGNALLING_BY_NGF	0.1722	0.8234	0.8275	0.98473	1	0.232	0.205	0.187	0.99523	0.487
c6_all_v5	CAHOY_NEURONAL	47	http://www.broadinstitute.org/gsea/msigdb/cards/CAHOY_NEURONAL	0.23791	0.80783	0.7975	0.9848	1	0.255	0.187	0.208	1	0.512
c6_all_v5	NOTCH_DN.V1_DN	114	http://www.broadinstitute.org/gsea/msigdb/cards/NOTCH_DN.V1_DN	-0.21697	-0.80132	0.8435	0.98531	1	0.254	0.221	0.2	0.99889	0.498
c6_all_v5	STK33_DN	225	http://www.broadinstitute.org/gsea/msigdb/cards/STK33_DN	-0.17266	-0.74534	0.9695	0.98549	1	0.28	0.263	0.21	0.99801	0.488
c2_cp_v5	KEGG_HOMOLOGOUS_RECOMBINATION	28	http://www.broadinstitute.org/gsea/msigdb/cards/KEGG_HOMOLOGOUS_RECOMBINATION	0.23255	0.75534	0.7562	0.98568	1	0.286	0.225	0.222	1	0.506
c2_cp_v5	SIG_CHEMOTAXIS	39	http://www.broadinstitute.org/gsea/msigdb/cards/SIG_CHEMOTAXIS	0.2255	0.7295	0.802	0.98602	1	0.359	0.268	0.264	0.99959	0.495
c6_all_v5	STK33_UP	242	http://www.broadinstitute.org/gsea/msigdb/cards/STK33_UP	-0.24653	-0.93724	0.5674	0.98608	1	0.236	0.16	0.202	0.98832	0.474
c6_all_v5	STK33_SKM_UP	220	http://www.broadinstitute.org/gsea/msigdb/cards/STK33_SKM_UP	-0.24132	-0.94435	0.5644	0.9867	1	0.268	0.21	0.215	0.98746	0.475
c6_all_v5	IL21_UP.V1_UP	119	http://www.broadinstitute.org/gsea/msigdb/cards/IL21_UP.V1_UP	-0.21911	-0.78415	0.8363	0.98677	1	0.261	0.218	0.205	1	0.505
c2_cp_v5	PID_AR_NONGENOMIC_PATHWAY	29	http://www.broadinstitute.org/gsea/msigdb/cards/PID_AR_NONGENOMIC_PATHWAY	0.26082	0.83162	0.6631	0.98687	1	0.31	0.195	0.25	0.99833	0.493
c2_cp_v5	PID_MET_PATHWAY	77	http://www.broadinstitute.org/gsea/msigdb/cards/PID_MET_PATHWAY	0.18225	0.74359	0.8559	0.98706	1	0.325	0.286	0.233	1	0.505
c2_cp_v5	REACTOME_CD28_CO_STIMULATION	30	http://www.broadinstitute.org/gsea/msigdb/cards/REACTOME_CD28_CO_STIMULATION	0.24119	0.78789	0.779	0.98708	1	0.4	0.286	0.286	0.99705	0.489
c2_cp_v5	BIOCARTA_TCR_PATHWAY	44	http://www.broadinstitute.org/gsea/msigdb/cards/BIOCARTA_TCR_PATHWAY	0.18992	0.77469	0.8273	0.98743	1	0.295	0.258	0.22	0.99922	0.498
c2_cp_v5	PID_IL4_2PATHWAY	53	http://www.broadinstitute.org/gsea/msigdb/cards/PID_IL4_2PATHWAY	0.20717	0.77109	0.8657	0.98778	1	0.321	0.219	0.251	0.99924	0.498
c6_all_v5	ERB2_UP.V1_UP	149	http://www.broadinstitute.org/gsea/msigdb/cards/ERB2_UP.V1_UP	-0.16574	-0.65	0.9835	0.98789	1	0.154	0.135	0.135	0.99379	0.35
c2_cp_v5	KEGG_FC_EPSILON_RI_SIGNALING_PATHWAY	62	http://www.broadinstitute.org/gsea/msigdb/cards/KEGG_FC_EPSILON_RI_SIGNALING_PATHWAY	0.20222	0.74667	0.8322	0.98803	1	0.29	0.219	0.228	1	0.519
c2_cp_v5	REACTOME_PIP3_ACTIVATES_AKT_SIGNALING	26	http://www.broadinstitute.org/gsea/msigdb/cards/REACTOME_PIP3_ACTIVATES_AKT_SIGNALING	0.23453	0.76436	0.8195	0.9882	1	0.269	0.22	0.21	1	0.505
c2_cp_v5	PID_ERBB1_RECEPTOR_PROXIMAL_PATHWAY	34	http://www.broadinstitute.org/gsea/msigdb/cards/PID_ERBB1_RECEPTOR_PROXIMAL_PATHWAY	0.22051	0.7313	0.8404	0.98878	1	0.412	0.286	0.295	1	0.516
c6_all_v5	VEGF_A_UP.V1_DN	165	http://www.broadinstitute.org/gsea/msigdb/cards/VEGF_A_UP.V1_DN	-0.18946	-0.76892	0.7464	0.98881	1	0.236	0.222	0.186	1	0.503
c2_cp_v5	REACTOME_SIGNALING_BY_NOTCH	87	http://www.broadinstitute.org/gsea/msigdb/cards/REACTOME_SIGNALING_BY_NOTCH	0.18736	0.76729	0.8687	0.98883	1	0.402	0.284	0.29	1	0.503
c2_cp_v5	REACTOME_SIGNAL_AMPLIFICATION	26	http://www.broadinstitute.org/gsea/msigdb/cards/REACTOME_SIGNAL_AMPLIFICATION	0.2338	0.79027	0.805	0.98898	1	0.346	0.219	0.271	0.9985	0.498
c2_cp_v5	KEGG_DILATED_CARDIOMYOPATHY	60	http://www.broadinstitute.org/gsea/msigdb/cards/KEGG_DILATED_CARDIOMYOPATHY	0.20466	0.79644	0.8876	0.989	1	0.25	0.205	0.2	1	0.508
c6_all_v5	RB_P107_DN.V1_UP	121	http://www.broadinstitute.org/gsea/msigdb/cards/RB_P107_DN.V1_UP	-0.19745	-0.66082	0.8636	0.98911	1	0.24	0.236	0.185	0.9957	0.429
c6_all_v5	PKCA_DN.V1_DN	115	http://www.broadinstitute.org/gsea/msigdb/cards/PKCA_DN.V1_DN	-0.18758	-0.75399	0.9303	0.98933	1	0.27	0.236	0.208	1	0.517
c6_all_v5	GCNP_SHH_UP_LATE.V1_DN	140	http://www.broadinstitute.org/gsea/msigdb/cards/GCNP_SHH_UP_LATE.V1_DN	-0.19072	-0.78729	0.8896	0.9894	1	0.114	0.0858	0.106	1	0.514
c6_all_v5	PRC2_EZH2_UP.V1_UP	141	http://www.broadinstitute.org/gsea/msigdb/cards/PRC2_EZH2_UP.V1_UP	-0.197	-0.79545	0.8027	0.98983	1	0.199	0.174	0.166	1	0.523
c2_cp_v5	PID_REG_GR_PATHWAY	66	http://www.broadinstitute.org/gsea/msigdb/cards/PID_REG_GR_PATHWAY	0.19872	0.77972	0.8428	0.99013	1	0.258	0.222	0.202	1	0.511
c6_all_v5	NOTCH_DN.V1_UP	115	http://www.broadinstitute.org/gsea/msigdb/cards/NOTCH_DN.V1_UP	0.19946	0.83124	0.8367	0.99046	1	0.226	0.187	0.185	1	0.522
c6_all_v5	ERB2_UP.V1_DN	171	http://www.broadinstitute.org/gsea/msigdb/cards/ERB2_UP.V1_DN	-0.17125	-0.62546	0.9381	0.99054	1	0.135	0.128	0.119	0.99444	0.3
c2_cp_v5	BIOCARTA_TNFR1_PATHWAY	29	http://www.broadinstitute.org/gsea/msigdb/cards/BIOCARTA_TNFR1_PATHWAY	0.22095	0.77632	0.786	0.99057	1	0.103	0.0494	0.0986	1	0.505
c2_cp_v5	REACTOME_GAB1_SIGNALOSOME	35	http://www.broadinstitute.org/gsea/msigdb/cards/REACTOME_GAB1_SIGNALOSOME	0.24394	0.82356	0.6947	0.99079	1	0.314	0.22	0.246	1	0.505
c6_all_v5	PIGF_UP.V1_UP	162	http://www.broadinstitute.org/gsea/msigdb/cards/PIGF_UP.V1_UP	-0.16388	-0.66986	0.912	0.99081	1	0.21	0.216	0.167	0.99845	0.477
c6_all_v5	P53_DN.V1_UP	147	http://www.broadinstitute.org/gsea/msigdb/cards/P53_DN.V1_UP	-0.20888	-0.75791	0.8775	0.99094	1	0.184	0.148	0.158	1	0.526
c2_cp_v5	REACTOME_MEIOSIS	48	http://www.broadinstitute.org/gsea/msigdb/cards/REACTOME_MEIOSIS	0.21528	0.78258	0.6851	0.99095	1	0.333	0.246	0.252	1	0.508
c2_cp_v5	REACTOME_INSULIN_RECEPTOR_SIGNALLING_CASCADE	63	http://www.broadinstitute.org/gsea/msigdb/cards/REACTOME_INSULIN_RECEPTOR_SIGNALLING_CASCADE	0.18483	0.75547	0.8399	0.99108	1	0.365	0.295	0.259	1	0.523
c2_cp_v5	KEGG_NEUROTROPHIN_SIGNALING_PATHWAY	113	http://www.broadinstitute.org/gsea/msigdb/cards/KEGG_NEUROTROPHIN_SIGNALING_PATHWAY	0.17595	0.74825	0.8322	0.99126	1	0.283	0.245	0.216	1	0.534
c6_all_v5	LTE2_UP.V1_DN	165	http://www.broadinstitute.org/gsea/msigdb/cards/LTE2_UP.V1_DN	0.1586	0.59904	0.9976	0.99166	1	0.309	0.245	0.236	1	0.64
c2_cp_v5	REACTOME_NOD1_2_SIGNALING_PATHWAY	28	http://www.broadinstitute.org/gsea/msigdb/cards/REACTOME_NOD1_2_SIGNALING_PATHWAY	0.24223	0.83247	0.7378	0.99173	1	0.25	0.189	0.203	1	0.505
c6_all_v5	ESC_V6.5_UP_LATE.V1_UP	129	http://www.broadinstitute.org/gsea/msigdb/cards/ESC_V6.5_UP_LATE.V1_UP	-0.19917	-0.74649	0.8955	0.99183	1	0.264	0.218	0.208	1	0.528
c2_cp_v5	REACTOME_TRANSPORT_OF_INORGANIC_CATIONS_ANIONS_AND_AMINO_ACIDS_OLIGOPEPTIDES	54	http://www.broadinstitute.org/gsea/msigdb/cards/REACTOME_TRANSPORT_OF_INORGANIC_CATIONS_ANIONS_AND_AMINO_ACIDS_OLIGOPEPTIDES	0.14311	0.46706	1	0.99197	1	0.389	0.324	0.264	0.99829	0.442
c2_cp_v5	KEGG_NON_SMALL_CELL_LUNG_CANCER	51	http://www.broadinstitute.org/gsea/msigdb/cards/KEGG_NON_SMALL_CELL_LUNG_CANCER	0.23693	0.84448	0.6768	0.99218	1	0.333	0.279	0.241	1	0.505
c2_cp_v5	KEGG_P53_SIGNALING_PATHWAY	64	http://www.broadinstitute.org/gsea/msigdb/cards/KEGG_P53_SIGNALING_PATHWAY	0.20263	0.73276	0.9017	0.99235	1	0.172	0.108	0.154	1	0.527
c6_all_v5	CYCLIN_D1_KE_.V1_DN	113	http://www.broadinstitute.org/gsea/msigdb/cards/CYCLIN_D1_KE_.V1_DN	-0.18152	-0.80201	0.8686	0.99253	1	0.177	0.168	0.148	1	0.529
c2_cp_v5	BIOCARTA_FCER1_PATHWAY	38	http://www.broadinstitute.org/gsea/msigdb/cards/BIOCARTA_FCER1_PATHWAY	0.20974	0.86561	0.6868	0.99298	1	0.368	0.286	0.264	0.99956	0.5
c6_all_v5	MEK_UP.V1_DN	158	http://www.broadinstitute.org/gsea/msigdb/cards/MEK_UP.V1_DN	0.20964	0.84187	0.6698	0.99363	1	0.278	0.21	0.223	1	0.536
c2_cp_v5	KEGG_ALDOSTERONE_REGULATED_SODIUM_REABSORPTION	35	http://www.broadinstitute.org/gsea/msigdb/cards/KEGG_ALDOSTERONE_REGULATED_SODIUM_REABSORPTION	0.21772	0.7574	0.8925	0.99375	1	0.286	0.195	0.231	1	0.531
c2_cp_v5	ST_ADRENERGIC	26	http://www.broadinstitute.org/gsea/msigdb/cards/ST_ADRENERGIC	0.27032	0.87118	0.6253	0.99388	1	0.192	0.0752	0.178	0.99842	0.499
c2_cp_v5	REACTOME_DAG_AND_IP3_SIGNALING	28	http://www.broadinstitute.org/gsea/msigdb/cards/REACTOME_DAG_AND_IP3_SIGNALING	0.23876	0.86816	0.7343	0.99406	1	0.321	0.205	0.256	0.99949	0.499
c2_cp_v5	REACTOME_ACTIVATION_OF_CHAPERONE_GENES_BY_XBP1S	41	http://www.broadinstitute.org/gsea/msigdb/cards/REACTOME_ACTIVATION_OF_CHAPERONE_GENES_BY_XBP1S	0.13319	0.39022	0.9925	0.99406	1	0.293	0.282	0.211	0.99757	0.492
c2_cp_v5	KEGG_PANCREATIC_CANCER	66	http://www.broadinstitute.org/gsea/msigdb/cards/KEGG_PANCREATIC_CANCER	0.22198	0.84056	0.6786	0.9941	1	0.288	0.23	0.223	1	0.514
c2_cp_v5	KEGG_AXON_GUIDANCE	94	http://www.broadinstitute.org/gsea/msigdb/cards/KEGG_AXON_GUIDANCE	0.21125	0.87694	0.752	0.99516	1	0.234	0.188	0.191	0.99876	0.497
c2_cp_v5	REACTOME_REGULATION_OF_WATER_BALANCE_BY_RENAL_AQUAPORINS	31	http://www.broadinstitute.org/gsea/msigdb/cards/REACTOME_REGULATION_OF_WATER_BALANCE_BY_RENAL_AQUAPORINS	0.25528	0.87344	0.6588	0.99575	1	0.355	0.205	0.283	0.9977	0.497
c2_cp_v5	REACTOME_PLATELET_HOMEOSTASIS	57	http://www.broadinstitute.org/gsea/msigdb/cards/REACTOME_PLATELET_HOMEOSTASIS	0.20615	0.8458	0.8024	0.99597	1	0.263	0.193	0.213	1	0.511
c2_cp_v5	PID_TRKR_PATHWAY	54	http://www.broadinstitute.org/gsea/msigdb/cards/PID_TRKR_PATHWAY	0.2307	0.85811	0.6728	0.99631	1	0.278	0.219	0.218	1	0.51
c6_all_v5	STK33_SKM_DN	209	http://www.broadinstitute.org/gsea/msigdb/cards/STK33_SKM_DN	-0.18573	-0.7692	0.9407	0.99639	1	0.297	0.255	0.225	1	0.543
c6_all_v5	AKT_UP_MTOR_DN.V1_UP	141	http://www.broadinstitute.org/gsea/msigdb/cards/AKT_UP_MTOR_DN.V1_UP	-0.20308	-0.788	0.8308	0.99651	1	0.277	0.233	0.214	1	0.549
c2_cp_v5	KEGG_BASE_EXCISION_REPAIR	33	http://www.broadinstitute.org/gsea/msigdb/cards/KEGG_BASE_EXCISION_REPAIR	-0.11844	-0.37037	0.9981	0.99699	1	0.333	0.345	0.219	1	0.6
c2_cp_v5	PID_PS1_PATHWAY	42	http://www.broadinstitute.org/gsea/msigdb/cards/PID_PS1_PATHWAY	0.22442	0.82366	0.6879	0.99705	1	0.429	0.319	0.293	1	0.519
h_all_v5	HALLMARK_UV_RESPONSE_DN	129	http://www.broadinstitute.org/gsea/msigdb/cards/HALLMARK_UV_RESPONSE_DN	0.21169	0.87245	0.7358	0.99763	0.999	0.364	0.263	0.271	1	0.533
c2_cp_v5	PID_AR_TF_PATHWAY	43	http://www.broadinstitute.org/gsea/msigdb/cards/PID_AR_TF_PATHWAY	0.23513	0.73284	0.7417	0.99776	1	0.349	0.234	0.268	1	0.556
c2_cp_v5	PID_ATR_PATHWAY	38	http://www.broadinstitute.org/gsea/msigdb/cards/PID_ATR_PATHWAY	0.14063	0.39702	0.9667	0.99787	1	0.105	0.131	0.0918	1	0.619
c2_cp_v5	REACTOME_ACTIVATION_OF_KAINATE_RECEPTORS_UPON_GLUTAMATE_BINDING	26	http://www.broadinstitute.org/gsea/msigdb/cards/REACTOME_ACTIVATION_OF_KAINATE_RECEPTORS_UPON_GLUTAMATE_BINDING	0.24232	0.83248	0.7046	0.99831	1	0.346	0.287	0.247	1	0.521
c6_all_v5	BCAT_BILD_ET_AL_DN	41	http://www.broadinstitute.org/gsea/msigdb/cards/BCAT_BILD_ET_AL_DN	-0.15859	-0.50896	0.9811	0.99895	1	0.0732	0.0684	0.0684	1	0.893
c2_cp_v5	REACTOME_MEIOTIC_SYNAPSIS	26	http://www.broadinstitute.org/gsea/msigdb/cards/REACTOME_MEIOTIC_SYNAPSIS	0.26503	0.94301	0.506	0.99989	1	0.346	0.223	0.27	0.99599	0.49
c2_cp_v5	BIOCARTA_HDAC_PATHWAY	25	http://www.broadinstitute.org/gsea/msigdb/cards/BIOCARTA_HDAC_PATHWAY	0.53485	1.5877	0.0377	1	0.88	0.52	0.236	0.398	1	0.804
c2_cp_v5	REACTOME_ANTIGEN_ACTIVATES_B_CELL_RECEPTOR_LEADING_TO_GENERATION_OF_SECOND_MESSENGERS	29	http://www.broadinstitute.org/gsea/msigdb/cards/REACTOME_ANTIGEN_ACTIVATES_B_CELL_RECEPTOR_LEADING_TO_GENERATION_OF_SECOND_MESSENGERS	0.42404	1.4767	0.04878	1	0.973	0.448	0.263	0.331	1	0.914
c2_cp_v5	REACTOME_SYNTHESIS_OF_PIPS_AT_THE_PLASMA_MEMBRANE	27	http://www.broadinstitute.org/gsea/msigdb/cards/REACTOME_SYNTHESIS_OF_PIPS_AT_THE_PLASMA_MEMBRANE	0.45518	1.3973	0.09438	1	0.989	0.444	0.228	0.344	1	0.959
c2_cp_v5	PID_BMP_PATHWAY	32	http://www.broadinstitute.org/gsea/msigdb/cards/PID_BMP_PATHWAY	0.40839	1.388	0.08506	1	0.989	0.281	0.146	0.241	1	0.943
c2_cp_v5	BIOCARTA_NFAT_PATHWAY	45	http://www.broadinstitute.org/gsea/msigdb/cards/BIOCARTA_NFAT_PATHWAY	0.34887	1.3495	0.1	1	0.993	0.311	0.195	0.251	1	0.953
c2_cp_v5	REACTOME_PI_METABOLISM	42	http://www.broadinstitute.org/gsea/msigdb/cards/REACTOME_PI_METABOLISM	0.37898	1.3471	0.1242	1	0.993	0.405	0.228	0.314	1	0.938
c2_cp_v5	REACTOME_G_ALPHA1213_SIGNALLING_EVENTS	63	http://www.broadinstitute.org/gsea/msigdb/cards/REACTOME_G_ALPHA1213_SIGNALLING_EVENTS	0.35946	1.3241	0.1002	1	0.997	0.365	0.195	0.295	1	0.941
c2_cp_v5	REACTOME_OPIOID_SIGNALLING	65	http://www.broadinstitute.org/gsea/msigdb/cards/REACTOME_OPIOID_SIGNALLING	0.29638	1.3219	0.08242	1	0.997	0.308	0.205	0.246	1	0.923
c2_cp_v5	REACTOME_IL_3_5_AND_GM_CSF_SIGNALING	39	http://www.broadinstitute.org/gsea/msigdb/cards/REACTOME_IL_3_5_AND_GM_CSF_SIGNALING	0.37858	1.3172	0.1041	1	0.997	0.487	0.263	0.36	1	0.907
c2_cp_v5	REACTOME_LOSS_OF_NLP_FROM_MITOTIC_CENTROSOMES	56	http://www.broadinstitute.org/gsea/msigdb/cards/REACTOME_LOSS_OF_NLP_FROM_MITOTIC_CENTROSOMES	0.35752	1.307	0.1987	1	0.997	0.446	0.275	0.325	1	0.904
c2_cp_v5	PID_ATM_PATHWAY	34	http://www.broadinstitute.org/gsea/msigdb/cards/PID_ATM_PATHWAY	0.43955	1.2997	0.2153	1	0.998	0.412	0.201	0.33	1	0.896
c2_cp_v5	PID_ERBB4_PATHWAY	31	http://www.broadinstitute.org/gsea/msigdb/cards/PID_ERBB4_PATHWAY	0.39976	1.2785	0.1614	1	0.999	0.516	0.279	0.373	1	0.906
c2_cp_v5	KEGG_INSULIN_SIGNALING_PATHWAY	117	http://www.broadinstitute.org/gsea/msigdb/cards/KEGG_INSULIN_SIGNALING_PATHWAY	0.28931	1.2753	0.1033	1	0.999	0.359	0.239	0.276	1	0.895
c2_cp_v5	PID_RAC1_REG_PATHWAY	34	http://www.broadinstitute.org/gsea/msigdb/cards/PID_RAC1_REG_PATHWAY	0.39255	1.2717	0.1623	1	1	0.382	0.185	0.312	1	0.884
c2_cp_v5	PID_CDC42_REG_PATHWAY	28	http://www.broadinstitute.org/gsea/msigdb/cards/PID_CDC42_REG_PATHWAY	0.3776	1.2655	0.1745	1	1	0.357	0.172	0.296	1	0.879
c2_cp_v5	PID_KIT_PATHWAY	47	http://www.broadinstitute.org/gsea/msigdb/cards/PID_KIT_PATHWAY	0.37466	1.2625	0.1861	1	1	0.426	0.25	0.32	1	0.865
c2_cp_v5	PID_ECADHERIN_STABILIZATION_PATHWAY	39	http://www.broadinstitute.org/gsea/msigdb/cards/PID_ECADHERIN_STABILIZATION_PATHWAY	0.35317	1.2526	0.1549	1	1	0.282	0.112	0.251	1	0.866
c2_cp_v5	KEGG_PRION_DISEASES	27	http://www.broadinstitute.org/gsea/msigdb/cards/KEGG_PRION_DISEASES	0.40876	1.2519	0.1679	1	1	0.333	0.194	0.269	1	0.847
c2_cp_v5	REACTOME_CELL_DEATH_SIGNALLING_VIA_NRAGE_NRIF_AND_NADE	50	http://www.broadinstitute.org/gsea/msigdb/cards/REACTOME_CELL_DEATH_SIGNALLING_VIA_NRAGE_NRIF_AND_NADE	0.33622	1.2483	0.16	1	1	0.26	0.108	0.233	1	0.837
c2_cp_v5	PID_CASPASE_PATHWAY	51	http://www.broadinstitute.org/gsea/msigdb/cards/PID_CASPASE_PATHWAY	0.33425	1.2445	0.1836	1	1	0.314	0.205	0.25	1	0.826
c2_cp_v5	REACTOME_NOTCH1_INTRACELLULAR_DOMAIN_REGULATES_TRANSCRIPTION	40	http://www.broadinstitute.org/gsea/msigdb/cards/REACTOME_NOTCH1_INTRACELLULAR_DOMAIN_REGULATES_TRANSCRIPTION	0.31844	1.2422	0.1481	1	1	0.3	0.125	0.263	1	0.811
c2_cp_v5	REACTOME_SIGNALING_BY_FGFR_MUTANTS	30	http://www.broadinstitute.org/gsea/msigdb/cards/REACTOME_SIGNALING_BY_FGFR_MUTANTS	0.39001	1.2413	0.2067	1	1	0.533	0.284	0.383	1	0.786
c2_cp_v5	KEGG_LONG_TERM_DEPRESSION	47	http://www.broadinstitute.org/gsea/msigdb/cards/KEGG_LONG_TERM_DEPRESSION	0.30018	1.2397	0.1293	1	1	0.213	0.129	0.186	1	0.763
c2_cp_v5	REACTOME_POTASSIUM_CHANNELS	45	http://www.broadinstitute.org/gsea/msigdb/cards/REACTOME_POTASSIUM_CHANNELS	0.35067	1.2325	0.1588	1	1	0.356	0.193	0.288	1	0.763
c2_cp_v5	PID_NCADHERIN_PATHWAY	30	http://www.broadinstitute.org/gsea/msigdb/cards/PID_NCADHERIN_PATHWAY	0.37183	1.2242	0.2215	1	1	0.467	0.294	0.33	1	0.768
c2_cp_v5	PID_REELIN_PATHWAY	25	http://www.broadinstitute.org/gsea/msigdb/cards/PID_REELIN_PATHWAY	0.3691	1.2168	0.1858	1	1	0.48	0.239	0.366	1	0.773
c2_cp_v5	PID_THROMBIN_PAR1_PATHWAY	40	http://www.broadinstitute.org/gsea/msigdb/cards/PID_THROMBIN_PAR1_PATHWAY	0.31177	1.2018	0.1723	1	1	0.2	0.0964	0.181	1	0.792
c2_cp_v5	KEGG_VASOPRESSIN_REGULATED_WATER_REABSORPTION	37	http://www.broadinstitute.org/gsea/msigdb/cards/KEGG_VASOPRESSIN_REGULATED_WATER_REABSORPTION	0.33108	1.2014	0.226	1	1	0.324	0.194	0.262	1	0.773
c2_cp_v5	KEGG_CHRONIC_MYELOID_LEUKEMIA	69	http://www.broadinstitute.org/gsea/msigdb/cards/KEGG_CHRONIC_MYELOID_LEUKEMIA	0.34015	1.1997	0.2716	1	1	0.377	0.239	0.288	1	0.762
c2_cp_v5	REACTOME_NRAGE_SIGNALS_DEATH_THROUGH_JNK	36	http://www.broadinstitute.org/gsea/msigdb/cards/REACTOME_NRAGE_SIGNALS_DEATH_THROUGH_JNK	0.3539	1.1857	0.2338	1	1	0.361	0.185	0.295	1	0.787
c2_cp_v5	REACTOME_APOPTOTIC_CLEAVAGE_OF_CELLULAR_PROTEINS	34	http://www.broadinstitute.org/gsea/msigdb/cards/REACTOME_APOPTOTIC_CLEAVAGE_OF_CELLULAR_PROTEINS	0.34918	1.1819	0.2126	1	1	0.324	0.128	0.283	1	0.784
c2_cp_v5	SIG_BCR_SIGNALING_PATHWAY	45	http://www.broadinstitute.org/gsea/msigdb/cards/SIG_BCR_SIGNALING_PATHWAY	0.33628	1.1806	0.25	1	1	0.4	0.279	0.289	1	0.773
c2_cp_v5	KEGG_PHOSPHATIDYLINOSITOL_SIGNALING_SYSTEM	66	http://www.broadinstitute.org/gsea/msigdb/cards/KEGG_PHOSPHATIDYLINOSITOL_SIGNALING_SYSTEM	0.30248	1.1749	0.1922	1	1	0.106	0.0453	0.102	1	0.772
c2_cp_v5	PID_RHOA_PATHWAY	41	http://www.broadinstitute.org/gsea/msigdb/cards/PID_RHOA_PATHWAY	0.30495	1.1737	0.2202	1	1	0.39	0.275	0.284	1	0.759
c2_cp_v5	PID_ER_NONGENOMIC_PATHWAY	39	http://www.broadinstitute.org/gsea/msigdb/cards/PID_ER_NONGENOMIC_PATHWAY	0.34423	1.1708	0.2494	1	1	0.385	0.195	0.31	1	0.748
c2_cp_v5	REACTOME_SIGNALING_BY_FGFR_IN_DISEASE	102	http://www.broadinstitute.org/gsea/msigdb/cards/REACTOME_SIGNALING_BY_FGFR_IN_DISEASE	0.25541	1.1654	0.2181	1	1	0.314	0.22	0.247	1	0.747
c2_cp_v5	KEGG_PROSTATE_CANCER	84	http://www.broadinstitute.org/gsea/msigdb/cards/KEGG_PROSTATE_CANCER	0.28786	1.1643	0.2344	1	1	0.44	0.284	0.317	1	0.738
c2_cp_v5	BIOCARTA_RHO_PATHWAY	32	http://www.broadinstitute.org/gsea/msigdb/cards/BIOCARTA_RHO_PATHWAY	0.35928	1.1621	0.2931	1	1	0.188	0.064	0.176	1	0.725
c2_cp_v5	PID_HEDGEHOG_GLI_PATHWAY	43	http://www.broadinstitute.org/gsea/msigdb/cards/PID_HEDGEHOG_GLI_PATHWAY	0.3147	1.1596	0.2866	1	1	0.465	0.291	0.331	1	0.719
c2_cp_v5	KEGG_ADHERENS_JUNCTION	68	http://www.broadinstitute.org/gsea/msigdb/cards/KEGG_ADHERENS_JUNCTION	0.28814	1.1461	0.2172	1	1	0.353	0.238	0.27	1	0.744
c2_cp_v5	KEGG_LONG_TERM_POTENTIATION	51	http://www.broadinstitute.org/gsea/msigdb/cards/KEGG_LONG_TERM_POTENTIATION	0.26899	1.1408	0.2578	1	1	0.196	0.146	0.168	1	0.739
c2_cp_v5	REACTOME_PLC_BETA_MEDIATED_EVENTS	36	http://www.broadinstitute.org/gsea/msigdb/cards/REACTOME_PLC_BETA_MEDIATED_EVENTS	0.28253	1.1334	0.2236	1	1	0.333	0.205	0.266	1	0.75
c2_cp_v5	PID_INSULIN_PATHWAY	41	http://www.broadinstitute.org/gsea/msigdb/cards/PID_INSULIN_PATHWAY	0.31147	1.1312	0.2787	1	1	0.415	0.286	0.297	1	0.74
c2_cp_v5	REACTOME_NEUROTRANSMITTER_RECEPTOR_BINDING_AND_DOWNSTREAM_TRANSMISSION_IN_THE_POSTSYNAPTIC_CELL	85	http://www.broadinstitute.org/gsea/msigdb/cards/REACTOME_NEUROTRANSMITTER_RECEPTOR_BINDING_AND_DOWNSTREAM_TRANSMISSION_IN_THE_POSTSYNAPTIC_CELL	0.24978	1.13	0.209	1	1	0.306	0.205	0.245	1	0.731
c2_cp_v5	REACTOME_PI3K_EVENTS_IN_ERBB4_SIGNALING	31	http://www.broadinstitute.org/gsea/msigdb/cards/REACTOME_PI3K_EVENTS_IN_ERBB4_SIGNALING	0.33226	1.1297	0.2893	1	1	0.355	0.22	0.277	1	0.714
c2_cp_v5	BIOCARTA_MYOSIN_PATHWAY	27	http://www.broadinstitute.org/gsea/msigdb/cards/BIOCARTA_MYOSIN_PATHWAY	0.36189	1.1194	0.2857	1	1	0.37	0.169	0.309	1	0.731
c2_cp_v5	REACTOME_RECRUITMENT_OF_MITOTIC_CENTROSOME_PROTEINS_AND_COMPLEXES	63	http://www.broadinstitute.org/gsea/msigdb/cards/REACTOME_RECRUITMENT_OF_MITOTIC_CENTROSOME_PROTEINS_AND_COMPLEXES	0.29078	1.1167	0.3152	1	1	0.413	0.275	0.301	1	0.724
c2_cp_v5	KEGG_INOSITOL_PHOSPHATE_METABOLISM	46	http://www.broadinstitute.org/gsea/msigdb/cards/KEGG_INOSITOL_PHOSPHATE_METABOLISM	0.32376	1.1146	0.3151	1	1	0.217	0.154	0.184	1	0.717
c2_cp_v5	KEGG_MELANOMA	53	http://www.broadinstitute.org/gsea/msigdb/cards/KEGG_MELANOMA	0.31878	1.1145	0.2854	1	1	0.453	0.266	0.334	1	0.701
c2_cp_v5	ST_FAS_SIGNALING_PATHWAY	61	http://www.broadinstitute.org/gsea/msigdb/cards/ST_FAS_SIGNALING_PATHWAY	0.23461	1.1051	0.2695	1	1	0.148	0.0799	0.136	1	0.727
c2_cp_v5	REACTOME_GABA_RECEPTOR_ACTIVATION	32	http://www.broadinstitute.org/gsea/msigdb/cards/REACTOME_GABA_RECEPTOR_ACTIVATION	0.29734	1.103	0.3143	1	1	0.375	0.205	0.299	1	0.715
c2_cp_v5	ST_B_CELL_ANTIGEN_RECEPTOR	38	http://www.broadinstitute.org/gsea/msigdb/cards/ST_B_CELL_ANTIGEN_RECEPTOR	0.30208	1.0981	0.3577	1	1	0.395	0.263	0.292	1	0.722
c2_cp_v5	PID_RHOA_REG_PATHWAY	39	http://www.broadinstitute.org/gsea/msigdb/cards/PID_RHOA_REG_PATHWAY	0.33414	1.0972	0.3259	1	1	0.205	0.108	0.184	1	0.707
c2_cp_v5	KEGG_HEDGEHOG_SIGNALING_PATHWAY	35	http://www.broadinstitute.org/gsea/msigdb/cards/KEGG_HEDGEHOG_SIGNALING_PATHWAY	0.33413	1.0951	0.3325	1	1	0.257	0.105	0.231	1	0.701
c2_cp_v5	KEGG_COLORECTAL_CANCER	59	http://www.broadinstitute.org/gsea/msigdb/cards/KEGG_COLORECTAL_CANCER	0.2866	1.0942	0.3246	1	1	0.305	0.195	0.247	1	0.693
c2_cp_v5	ST_GA13_PATHWAY	33	http://www.broadinstitute.org/gsea/msigdb/cards/ST_GA13_PATHWAY	0.26855	1.0911	0.3287	1	1	0.212	0.131	0.185	1	0.683
c2_cp_v5	PID_CD8_TCR_PATHWAY	50	http://www.broadinstitute.org/gsea/msigdb/cards/PID_CD8_TCR_PATHWAY	0.32594	1.0894	0.349	1	1	0.38	0.219	0.298	1	0.68
c2_cp_v5	KEGG_GLIOMA	60	http://www.broadinstitute.org/gsea/msigdb/cards/KEGG_GLIOMA	0.2962	1.081	0.3486	1	1	0.4	0.285	0.287	1	0.696
c2_cp_v5	PID_TXA2PATHWAY	53	http://www.broadinstitute.org/gsea/msigdb/cards/PID_TXA2PATHWAY	0.30582	1.0755	0.3539	1	1	0.189	0.0675	0.177	1	0.693
c2_cp_v5	REACTOME_NEURONAL_SYSTEM	154	http://www.broadinstitute.org/gsea/msigdb/cards/REACTOME_NEURONAL_SYSTEM	0.23249	1.0748	0.312	1	1	0.279	0.205	0.225	1	0.683
c2_cp_v5	REACTOME_SIGNALING_BY_SCF_KIT	71	http://www.broadinstitute.org/gsea/msigdb/cards/REACTOME_SIGNALING_BY_SCF_KIT	0.28415	1.0691	0.3536	1	1	0.324	0.22	0.254	1	0.686
c2_cp_v5	PID_FCER1_PATHWAY	59	http://www.broadinstitute.org/gsea/msigdb/cards/PID_FCER1_PATHWAY	0.26021	1.0685	0.332	1	1	0.424	0.297	0.299	1	0.681
c2_cp_v5	BIOCARTA_P38MAPK_PATHWAY	37	http://www.broadinstitute.org/gsea/msigdb/cards/BIOCARTA_P38MAPK_PATHWAY	0.28802	1.0666	0.3658	1	1	0.324	0.242	0.247	1	0.675
c2_cp_v5	REACTOME_SIGNALING_BY_ERBB2	88	http://www.broadinstitute.org/gsea/msigdb/cards/REACTOME_SIGNALING_BY_ERBB2	0.23489	1.0603	0.3286	1	1	0.307	0.22	0.241	1	0.682
c2_cp_v5	BIOCARTA_PAR1_PATHWAY	32	http://www.broadinstitute.org/gsea/msigdb/cards/BIOCARTA_PAR1_PATHWAY	0.31373	1.0602	0.3891	1	1	0.375	0.195	0.302	1	0.668
c2_cp_v5	REACTOME_APOPTOTIC_EXECUTION_PHASE	42	http://www.broadinstitute.org/gsea/msigdb/cards/REACTOME_APOPTOTIC_EXECUTION_PHASE	0.28639	1.0563	0.3798	1	1	0.262	0.128	0.229	1	0.673
c2_cp_v5	BIOCARTA_ALK_PATHWAY	27	http://www.broadinstitute.org/gsea/msigdb/cards/BIOCARTA_ALK_PATHWAY	0.32164	1.055	0.4013	1	1	0.333	0.221	0.26	1	0.662
c2_cp_v5	ST_P38_MAPK_PATHWAY	36	http://www.broadinstitute.org/gsea/msigdb/cards/ST_P38_MAPK_PATHWAY	0.2734	1.0516	0.3598	1	1	0.222	0.148	0.19	1	0.663
c2_cp_v5	REACTOME_DOWNSTREAM_SIGNALING_OF_ACTIVATED_FGFR	78	http://www.broadinstitute.org/gsea/msigdb/cards/REACTOME_DOWNSTREAM_SIGNALING_OF_ACTIVATED_FGFR	0.23736	1.0504	0.3557	1	1	0.295	0.22	0.231	1	0.648
c2_cp_v5	PID_PI3KCI_PATHWAY	48	http://www.broadinstitute.org/gsea/msigdb/cards/PID_PI3KCI_PATHWAY	0.29329	1.0497	0.4008	1	1	0.271	0.195	0.219	1	0.634
c2_cp_v5	REACTOME_GLUCAGON_SIGNALING_IN_METABOLIC_REGULATION	26	http://www.broadinstitute.org/gsea/msigdb/cards/REACTOME_GLUCAGON_SIGNALING_IN_METABOLIC_REGULATION	0.30619	1.045	0.3886	1	1	0.462	0.229	0.356	1	0.649
c2_cp_v5	REACTOME_PI_3K_CASCADE	38	http://www.broadinstitute.org/gsea/msigdb/cards/REACTOME_PI_3K_CASCADE	0.27693	1.0433	0.3874	1	1	0.421	0.284	0.303	1	0.64
c2_cp_v5	SIG_IL4RECEPTOR_IN_B_LYPHOCYTES	27	http://www.broadinstitute.org/gsea/msigdb/cards/SIG_IL4RECEPTOR_IN_B_LYPHOCYTES	0.34248	1.0423	0.428	1	1	0.444	0.279	0.321	1	0.624
c2_cp_v5	REACTOME_IL_2_SIGNALING	37	http://www.broadinstitute.org/gsea/msigdb/cards/REACTOME_IL_2_SIGNALING	0.27733	1.0343	0.4268	1	1	0.405	0.279	0.293	1	0.645
c2_cp_v5	ST_ERK1_ERK2_MAPK_PATHWAY	30	http://www.broadinstitute.org/gsea/msigdb/cards/ST_ERK1_ERK2_MAPK_PATHWAY	0.26601	1.0339	0.3929	1	1	0.367	0.279	0.265	1	0.633
c2_cp_v5	KEGG_B_CELL_RECEPTOR_SIGNALING_PATHWAY	73	http://www.broadinstitute.org/gsea/msigdb/cards/KEGG_B_CELL_RECEPTOR_SIGNALING_PATHWAY	0.26911	1.0317	0.4306	1	1	0.26	0.195	0.211	1	0.623
c2_cp_v5	PID_HES_HEY_PATHWAY	39	http://www.broadinstitute.org/gsea/msigdb/cards/PID_HES_HEY_PATHWAY	0.32539	1.0233	0.4142	1	1	0.308	0.13	0.269	1	0.643
c2_cp_v5	PID_TCR_PATHWAY	62	http://www.broadinstitute.org/gsea/msigdb/cards/PID_TCR_PATHWAY	0.31466	1.0229	0.3976	1	1	0.355	0.22	0.278	1	0.633
c2_cp_v5	REACTOME_MITOTIC_G2_G2_M_PHASES	77	http://www.broadinstitute.org/gsea/msigdb/cards/REACTOME_MITOTIC_G2_G2_M_PHASES	0.26577	1.0215	0.4147	1	1	0.377	0.265	0.278	1	0.626
c2_cp_v5	REACTOME_SIGNALING_BY_RHO_GTPASES	100	http://www.broadinstitute.org/gsea/msigdb/cards/REACTOME_SIGNALING_BY_RHO_GTPASES	0.25991	1.0211	0.4116	1	1	0.28	0.186	0.23	1	0.615
c2_cp_v5	PID_BETA_CATENIN_NUC_PATHWAY	63	http://www.broadinstitute.org/gsea/msigdb/cards/PID_BETA_CATENIN_NUC_PATHWAY	0.25428	1.0202	0.4471	1	1	0.27	0.128	0.236	1	0.604
c2_cp_v5	KEGG_REGULATION_OF_ACTIN_CYTOSKELETON	173	http://www.broadinstitute.org/gsea/msigdb/cards/KEGG_REGULATION_OF_ACTIN_CYTOSKELETON	0.23508	1.0128	0.4249	1	1	0.26	0.195	0.212	1	0.62
c2_cp_v5	REACTOME_PI3K_EVENTS_IN_ERBB2_SIGNALING	37	http://www.broadinstitute.org/gsea/msigdb/cards/REACTOME_PI3K_EVENTS_IN_ERBB2_SIGNALING	0.28755	1.0092	0.4449	1	1	0.351	0.22	0.275	1	0.624
c2_cp_v5	REACTOME_SIGNALING_BY_FGFR	88	http://www.broadinstitute.org/gsea/msigdb/cards/REACTOME_SIGNALING_BY_FGFR	0.21715	1.0088	0.4237	1	1	0.284	0.22	0.223	1	0.61
c2_cp_v5	PID_TGFBR_PATHWAY	52	http://www.broadinstitute.org/gsea/msigdb/cards/PID_TGFBR_PATHWAY	0.2446	1.0077	0.4569	1	1	0.25	0.221	0.196	1	0.606
c2_cp_v5	PID_RAC1_PATHWAY	51	http://www.broadinstitute.org/gsea/msigdb/cards/PID_RAC1_PATHWAY	0.27198	1.0045	0.4491	1	1	0.333	0.236	0.256	1	0.608
c2_cp_v5	REACTOME_REGULATION_OF_INSULIN_SECRETION_BY_GLUCAGON_LIKE_PEPTIDE1	30	http://www.broadinstitute.org/gsea/msigdb/cards/REACTOME_REGULATION_OF_INSULIN_SECRETION_BY_GLUCAGON_LIKE_PEPTIDE1	0.2767	1.0043	0.447	1	1	0.367	0.236	0.281	1	0.59
c2_cp_v5	BIOCARTA_CREB_PATHWAY	25	http://www.broadinstitute.org/gsea/msigdb/cards/BIOCARTA_CREB_PATHWAY	0.28814	1.0037	0.4657	1	1	0.52	0.285	0.372	1	0.584
c2_cp_v5	KEGG_ENDOMETRIAL_CANCER	50	http://www.broadinstitute.org/gsea/msigdb/cards/KEGG_ENDOMETRIAL_CANCER	0.27757	1.0025	0.451	1	1	0.34	0.221	0.266	1	0.564
c2_cp_v5	BIOCARTA_INTEGRIN_PATHWAY	34	http://www.broadinstitute.org/gsea/msigdb/cards/BIOCARTA_INTEGRIN_PATHWAY	0.28373	1.0013	0.4635	1	1	0.529	0.341	0.35	1	0.56
c2_cp_v5	REACTOME_REGULATION_OF_INSULIN_SECRETION	60	http://www.broadinstitute.org/gsea/msigdb/cards/REACTOME_REGULATION_OF_INSULIN_SECRETION	0.22378	0.99929	0.4669	1	1	0.267	0.194	0.216	1	0.56
c2_cp_v5	PID_HDAC_CLASSII_PATHWAY	32	http://www.broadinstitute.org/gsea/msigdb/cards/PID_HDAC_CLASSII_PATHWAY	0.24482	0.99864	0.4684	1	1	0.188	0.121	0.165	1	0.546
c2_cp_v5	REACTOME_ION_CHANNEL_TRANSPORT	30	http://www.broadinstitute.org/gsea/msigdb/cards/REACTOME_ION_CHANNEL_TRANSPORT	0.3248	0.99191	0.4466	1	1	0.467	0.272	0.34	1	0.562
c2_cp_v5	BIOCARTA_G1_PATHWAY	26	http://www.broadinstitute.org/gsea/msigdb/cards/BIOCARTA_G1_PATHWAY	0.3556	0.99018	0.4702	1	1	0.192	0.0841	0.176	1	0.551
c2_cp_v5	PID_PI3K_PLC_TRK_PATHWAY	31	http://www.broadinstitute.org/gsea/msigdb/cards/PID_PI3K_PLC_TRK_PATHWAY	0.32288	0.98907	0.4529	1	1	0.419	0.219	0.328	1	0.544
c2_cp_v5	ST_JNK_MAPK_PATHWAY	37	http://www.broadinstitute.org/gsea/msigdb/cards/ST_JNK_MAPK_PATHWAY	0.29839	0.98761	0.4826	1	1	0.351	0.262	0.26	1	0.541
c2_cp_v5	PID_RET_PATHWAY	35	http://www.broadinstitute.org/gsea/msigdb/cards/PID_RET_PATHWAY	0.27556	0.98514	0.4603	1	1	0.371	0.219	0.291	1	0.538
c2_cp_v5	PID_HDAC_CLASSI_PATHWAY	62	http://www.broadinstitute.org/gsea/msigdb/cards/PID_HDAC_CLASSI_PATHWAY	0.20072	0.98415	0.4888	1	1	0.387	0.291	0.276	1	0.532
c2_cp_v5	REACTOME_P75_NTR_RECEPTOR_MEDIATED_SIGNALLING	69	http://www.broadinstitute.org/gsea/msigdb/cards/REACTOME_P75_NTR_RECEPTOR_MEDIATED_SIGNALLING	0.2352	0.98089	0.479	1	1	0.188	0.108	0.169	1	0.533
c2_cp_v5	ST_GRANULE_CELL_SURVIVAL_PATHWAY	26	http://www.broadinstitute.org/gsea/msigdb/cards/ST_GRANULE_CELL_SURVIVAL_PATHWAY	0.27113	0.98032	0.4879	1	1	0.385	0.22	0.3	1	0.521
c2_cp_v5	PID_AR_PATHWAY	55	http://www.broadinstitute.org/gsea/msigdb/cards/PID_AR_PATHWAY	0.27091	0.97414	0.4939	1	1	0.455	0.322	0.309	1	0.535
c2_cp_v5	REACTOME_GENERIC_TRANSCRIPTION_PATHWAY	308	http://www.broadinstitute.org/gsea/msigdb/cards/REACTOME_GENERIC_TRANSCRIPTION_PATHWAY	0.23869	0.97065	0.4945	1	1	0.351	0.268	0.263	1	0.535
c2_cp_v5	REACTOME_GABA_B_RECEPTOR_ACTIVATION	28	http://www.broadinstitute.org/gsea/msigdb/cards/REACTOME_GABA_B_RECEPTOR_ACTIVATION	0.26344	0.96628	0.5223	1	1	0.214	0.067	0.2	1	0.544
c2_cp_v5	PID_DELTA_NP63_PATHWAY	39	http://www.broadinstitute.org/gsea/msigdb/cards/PID_DELTA_NP63_PATHWAY	0.25754	0.95616	0.5561	1	1	0.385	0.225	0.299	1	0.572
c2_cp_v5	REACTOME_SIGNALING_BY_NOTCH1	60	http://www.broadinstitute.org/gsea/msigdb/cards/REACTOME_SIGNALING_BY_NOTCH1	0.23212	0.9537	0.5632	1	1	0.283	0.17	0.236	1	0.57
c2_cp_v5	PID_FANCONI_PATHWAY	45	http://www.broadinstitute.org/gsea/msigdb/cards/PID_FANCONI_PATHWAY	0.30882	0.95363	0.483	1	1	0.311	0.23	0.24	1	0.559
c2_cp_v5	SIG_INSULIN_RECEPTOR_PATHWAY_IN_CARDIAC_MYOCYTES	46	http://www.broadinstitute.org/gsea/msigdb/cards/SIG_INSULIN_RECEPTOR_PATHWAY_IN_CARDIAC_MYOCYTES	0.29087	0.95362	0.5106	1	1	0.435	0.286	0.311	1	0.546
c2_cp_v5	ST_INTEGRIN_SIGNALING_PATHWAY	76	http://www.broadinstitute.org/gsea/msigdb/cards/ST_INTEGRIN_SIGNALING_PATHWAY	0.23317	0.95354	0.5456	1	1	0.329	0.22	0.258	1	0.533
c2_cp_v5	PID_LKB1_PATHWAY	45	http://www.broadinstitute.org/gsea/msigdb/cards/PID_LKB1_PATHWAY	0.24694	0.95261	0.4913	1	1	0.289	0.194	0.234	1	0.519
c2_cp_v5	REACTOME_PI3K_AKT_ACTIVATION	33	http://www.broadinstitute.org/gsea/msigdb/cards/REACTOME_PI3K_AKT_ACTIVATION	0.28004	0.95041	0.5288	1	1	0.333	0.22	0.261	1	0.518
c2_cp_v5	PID_ERBB1_INTERNALIZATION_PATHWAY	38	http://www.broadinstitute.org/gsea/msigdb/cards/PID_ERBB1_INTERNALIZATION_PATHWAY	0.28246	0.95035	0.5252	1	1	0.316	0.219	0.247	0.99995	0.5
c2_cp_v5	BIOCARTA_GH_PATHWAY	25	http://www.broadinstitute.org/gsea/msigdb/cards/BIOCARTA_GH_PATHWAY	0.28062	0.94752	0.5446	1	1	0.36	0.219	0.282	1	0.502
c2_cp_v5	PID_PLK1_PATHWAY	44	http://www.broadinstitute.org/gsea/msigdb/cards/PID_PLK1_PATHWAY	0.3003	0.94598	0.5184	1	1	0.227	0.131	0.198	0.99448	0.487
c2_cp_v5	ST_DIFFERENTIATION_PATHWAY_IN_PC12_CELLS	39	http://www.broadinstitute.org/gsea/msigdb/cards/ST_DIFFERENTIATION_PATHWAY_IN_PC12_CELLS	0.25519	0.93269	0.5253	1	1	0.462	0.279	0.334	1	0.535
c2_cp_v5	PID_AURORA_A_PATHWAY	29	http://www.broadinstitute.org/gsea/msigdb/cards/PID_AURORA_A_PATHWAY	0.26944	0.91361	0.5546	1	1	0.207	0.122	0.182	1	0.618
c2_cp_v5	KEGG_ERBB_SIGNALING_PATHWAY	76	http://www.broadinstitute.org/gsea/msigdb/cards/KEGG_ERBB_SIGNALING_PATHWAY	0.23826	0.91046	0.5806	1	1	0.303	0.219	0.238	1	0.621
c2_cp_v5	REACTOME_TRANSMISSION_ACROSS_CHEMICAL_SYNAPSES	111	http://www.broadinstitute.org/gsea/msigdb/cards/REACTOME_TRANSMISSION_ACROSS_CHEMICAL_SYNAPSES	0.19159	0.90914	0.7333	1	1	0.324	0.245	0.247	1	0.612
c2_cp_v5	PID_P53_REGULATION_PATHWAY	54	http://www.broadinstitute.org/gsea/msigdb/cards/PID_P53_REGULATION_PATHWAY	0.25025	0.90668	0.5837	1	1	0.167	0.108	0.149	1	0.609
c2_cp_v5	KEGG_WNT_SIGNALING_PATHWAY	122	http://www.broadinstitute.org/gsea/msigdb/cards/KEGG_WNT_SIGNALING_PATHWAY	0.21477	0.9064	0.6078	1	1	0.205	0.143	0.177	1	0.599
c2_cp_v5	ST_G_ALPHA_I_PATHWAY	27	http://www.broadinstitute.org/gsea/msigdb/cards/ST_G_ALPHA_I_PATHWAY	0.27889	0.90439	0.5556	1	1	0.296	0.219	0.232	1	0.599
c2_cp_v5	REACTOME_FACTORS_INVOLVED_IN_MEGAKARYOCYTE_DEVELOPMENT_AND_PLATELET_PRODUCTION	87	http://www.broadinstitute.org/gsea/msigdb/cards/REACTOME_FACTORS_INVOLVED_IN_MEGAKARYOCYTE_DEVELOPMENT_AND_PLATELET_PRODUCTION	0.21783	0.90355	0.6044	1	1	0.333	0.255	0.25	1	0.583
c2_cp_v5	KEGG_MELANOGENESIS	78	http://www.broadinstitute.org/gsea/msigdb/cards/KEGG_MELANOGENESIS	0.20445	0.89413	0.7233	1	1	0.179	0.114	0.16	1	0.615
c2_cp_v5	PID_GMCSF_PATHWAY	35	http://www.broadinstitute.org/gsea/msigdb/cards/PID_GMCSF_PATHWAY	0.25883	0.89151	0.6406	1	1	0.371	0.219	0.291	1	0.613
c2_cp_v5	PID_NFAT_3PATHWAY	53	http://www.broadinstitute.org/gsea/msigdb/cards/PID_NFAT_3PATHWAY	0.21925	0.88825	0.6555	1	1	0.208	0.153	0.176	1	0.615
c2_cp_v5	PID_BARD1_PATHWAY	29	http://www.broadinstitute.org/gsea/msigdb/cards/PID_BARD1_PATHWAY	0.29009	0.88725	0.5663	1	1	0.172	0.0841	0.158	1	0.611
c2_cp_v5	KEGG_GAP_JUNCTION	68	http://www.broadinstitute.org/gsea/msigdb/cards/KEGG_GAP_JUNCTION	0.21713	0.88553	0.7226	1	1	0.279	0.206	0.223	1	0.597
c2_cp_v5	REACTOME_MITOTIC_PROMETAPHASE	80	http://www.broadinstitute.org/gsea/msigdb/cards/REACTOME_MITOTIC_PROMETAPHASE	0.29094	0.88473	0.5509	1	1	0.3	0.262	0.223	1	0.584
c2_cp_v5	REACTOME_O_LINKED_GLYCOSYLATION_OF_MUCINS	30	http://www.broadinstitute.org/gsea/msigdb/cards/REACTOME_O_LINKED_GLYCOSYLATION_OF_MUCINS	0.29039	0.88415	0.5823	1	1	0.133	0.0765	0.123	1	0.573
c2_cp_v5	KEGG_ACUTE_MYELOID_LEUKEMIA	55	http://www.broadinstitute.org/gsea/msigdb/cards/KEGG_ACUTE_MYELOID_LEUKEMIA	0.25497	0.88357	0.625	1	1	0.273	0.209	0.217	1	0.558
c2_cp_v5	ST_PHOSPHOINOSITIDE_3_KINASE_PATHWAY	36	http://www.broadinstitute.org/gsea/msigdb/cards/ST_PHOSPHOINOSITIDE_3_KINASE_PATHWAY	0.26237	0.8833	0.5723	1	1	0.361	0.265	0.266	1	0.546
c2_cp_v5	PID_AURORA_B_PATHWAY	39	http://www.broadinstitute.org/gsea/msigdb/cards/PID_AURORA_B_PATHWAY	0.28209	0.882	0.5611	1	1	0.462	0.269	0.339	1	0.535
c2_cp_v5	KEGG_PROGESTERONE_MEDIATED_OOCYTE_MATURATION	72	http://www.broadinstitute.org/gsea/msigdb/cards/KEGG_PROGESTERONE_MEDIATED_OOCYTE_MATURATION	0.20114	0.8807	0.7073	1	1	0.278	0.205	0.222	1	0.53
c2_cp_v5	KEGG_TGF_BETA_SIGNALING_PATHWAY	67	http://www.broadinstitute.org/gsea/msigdb/cards/KEGG_TGF_BETA_SIGNALING_PATHWAY	0.22652	0.88015	0.6667	1	1	0.134	0.07	0.126	1	0.511
c2_cp_v5	REACTOME_DOWNSTREAM_SIGNAL_TRANSDUCTION	87	http://www.broadinstitute.org/gsea/msigdb/cards/REACTOME_DOWNSTREAM_SIGNAL_TRANSDUCTION	0.20499	0.87741	0.6918	1	1	0.356	0.28	0.258	1	0.504
c2_cp_v5	PID_ECADHERIN_NASCENT_AJ_PATHWAY	39	http://www.broadinstitute.org/gsea/msigdb/cards/PID_ECADHERIN_NASCENT_AJ_PATHWAY	0.2247	0.85883	0.6458	1	1	0.308	0.24	0.234	1	0.527
c2_cp_v5	BIOCARTA_PDGF_PATHWAY	32	http://www.broadinstitute.org/gsea/msigdb/cards/BIOCARTA_PDGF_PATHWAY	0.23564	0.84983	0.7221	1	1	0.375	0.279	0.271	1	0.539
c2_cp_v5	PID_IGF1_PATHWAY	29	http://www.broadinstitute.org/gsea/msigdb/cards/PID_IGF1_PATHWAY	0.25621	0.8471	0.6964	1	1	0.345	0.239	0.263	1	0.535
c2_cp_v5	BIOCARTA_HIVNEF_PATHWAY	57	http://www.broadinstitute.org/gsea/msigdb/cards/BIOCARTA_HIVNEF_PATHWAY	0.2151	0.8467	0.697	1	1	0.123	0.0494	0.117	1	0.525
c2_cp_v5	SIG_PIP3_SIGNALING_IN_CARDIAC_MYOCTES	60	http://www.broadinstitute.org/gsea/msigdb/cards/SIG_PIP3_SIGNALING_IN_CARDIAC_MYOCTES	0.22173	0.83473	0.6696	1	1	0.383	0.286	0.275	1	0.525
c2_cp_v5	REACTOME_PURINE_METABOLISM	26	http://www.broadinstitute.org/gsea/msigdb/cards/REACTOME_PURINE_METABOLISM	-0.58843	-1.6731	0.02321	1	0.751	0.423	0.186	0.345	1	0.727
c2_cp_v5	KEGG_CYTOSOLIC_DNA_SENSING_PATHWAY	41	http://www.broadinstitute.org/gsea/msigdb/cards/KEGG_CYTOSOLIC_DNA_SENSING_PATHWAY	-0.46143	-1.6316	0.02249	1	0.836	0.366	0.172	0.304	1	0.665
c2_cp_v5	REACTOME_METABOLISM_OF_NUCLEOTIDES	58	http://www.broadinstitute.org/gsea/msigdb/cards/REACTOME_METABOLISM_OF_NUCLEOTIDES	-0.49177	-1.6095	0.03626	1	0.875	0.483	0.289	0.345	1	0.634
c2_cp_v5	REACTOME_RNA_POL_III_TRANSCRIPTION_INITIATION_FROM_TYPE_3_PROMOTER	26	http://www.broadinstitute.org/gsea/msigdb/cards/REACTOME_RNA_POL_III_TRANSCRIPTION_INITIATION_FROM_TYPE_3_PROMOTER	-0.53428	-1.6017	0.03643	1	0.883	0.423	0.114	0.375	1	0.567
c2_cp_v5	KEGG_TYROSINE_METABOLISM	26	http://www.broadinstitute.org/gsea/msigdb/cards/KEGG_TYROSINE_METABOLISM	-0.58453	-1.579	0.03738	1	0.907	0.538	0.198	0.433	1	0.585
c2_cp_v5	ST_TUMOR_NECROSIS_FACTOR_PATHWAY	29	http://www.broadinstitute.org/gsea/msigdb/cards/ST_TUMOR_NECROSIS_FACTOR_PATHWAY	-0.4663	-1.5714	0.04293	1	0.917	0.379	0.223	0.295	1	0.553
c2_cp_v5	KEGG_LEISHMANIA_INFECTION	50	http://www.broadinstitute.org/gsea/msigdb/cards/KEGG_LEISHMANIA_INFECTION	-0.47561	-1.5571	0.04218	1	0.937	0.42	0.226	0.326	1	0.556
c2_cp_v5	SIG_REGULATION_OF_THE_ACTIN_CYTOSKELETON_BY_RHO_GTPASES	28	http://www.broadinstitute.org/gsea/msigdb/cards/SIG_REGULATION_OF_THE_ACTIN_CYTOSKELETON_BY_RHO_GTPASES	-0.50757	-1.5536	0.06526	1	0.94	0.143	0.0291	0.139	1	0.518
c2_cp_v5	KEGG_RNA_POLYMERASE	29	http://www.broadinstitute.org/gsea/msigdb/cards/KEGG_RNA_POLYMERASE	-0.5543	-1.5526	0.07707	1	0.942	0.448	0.116	0.397	0.93603	0.475
c2_cp_v5	REACTOME_RESPONSE_TO_ELEVATED_PLATELET_CYTOSOLIC_CA2_	72	http://www.broadinstitute.org/gsea/msigdb/cards/REACTOME_RESPONSE_TO_ELEVATED_PLATELET_CYTOSOLIC_CA2_	-0.50687	-1.55	0.03387	1	0.944	0.569	0.253	0.427	0.85136	0.436
c2_cp_v5	REACTOME_MITOCHONDRIAL_PROTEIN_IMPORT	49	http://www.broadinstitute.org/gsea/msigdb/cards/REACTOME_MITOCHONDRIAL_PROTEIN_IMPORT	-0.59786	-1.5466	0.08475	1	0.946	0.653	0.286	0.468	0.81494	0.407
c2_cp_v5	REACTOME_HIV_LIFE_CYCLE	107	http://www.broadinstitute.org/gsea/msigdb/cards/REACTOME_HIV_LIFE_CYCLE	-0.38434	-1.5382	0.0573	1	0.959	0.421	0.282	0.304	0.79366	0.397
c2_cp_v5	KEGG_PPAR_SIGNALING_PATHWAY	51	http://www.broadinstitute.org/gsea/msigdb/cards/KEGG_PPAR_SIGNALING_PATHWAY	-0.48789	-1.5373	0.01324	1	0.96	0.451	0.229	0.349	0.73459	0.371
c2_cp_v5	PID_HIF1_TFPATHWAY	54	http://www.broadinstitute.org/gsea/msigdb/cards/PID_HIF1_TFPATHWAY	-0.46984	-1.5348	0.05184	1	0.964	0.444	0.194	0.36	0.70823	0.348
c2_cp_v5	REACTOME_LATE_PHASE_OF_HIV_LIFE_CYCLE	94	http://www.broadinstitute.org/gsea/msigdb/cards/REACTOME_LATE_PHASE_OF_HIV_LIFE_CYCLE	-0.39442	-1.5287	0.07491	1	0.97	0.383	0.252	0.288	0.70665	0.348
c2_cp_v5	NABA_MATRISOME_ASSOCIATED	372	http://www.broadinstitute.org/gsea/msigdb/cards/NABA_MATRISOME_ASSOCIATED	-0.40662	-1.5211	0.01235	1	0.972	0.403	0.228	0.32	0.7123	0.347
c2_cp_v5	REACTOME_RNA_POL_III_TRANSCRIPTION	33	http://www.broadinstitute.org/gsea/msigdb/cards/REACTOME_RNA_POL_III_TRANSCRIPTION	-0.46154	-1.5208	0.05626	1	0.972	0.333	0.114	0.296	0.67202	0.331
c6_all_v5	BRCA1_DN.V1_UP	59	http://www.broadinstitute.org/gsea/msigdb/cards/BRCA1_DN.V1_UP	0.366	1.3343	0.06509	1	0.847	0.39	0.177	0.322	1	0.751
c6_all_v5	E2F3_UP.V1_UP	138	http://www.broadinstitute.org/gsea/msigdb/cards/E2F3_UP.V1_UP	0.32906	1.3139	0.07796	1	0.876	0.275	0.145	0.238	1	0.618
c6_all_v5	KRAS.KIDNEY_UP.V1_UP	84	http://www.broadinstitute.org/gsea/msigdb/cards/KRAS.KIDNEY_UP.V1_UP	0.32174	1.2674	0.1	1	0.923	0.25	0.145	0.215	0.91102	0.452
c6_all_v5	PTEN_DN.V1_DN	93	http://www.broadinstitute.org/gsea/msigdb/cards/PTEN_DN.V1_DN	0.28913	1.1765	0.1667	1	0.971	0.247	0.15	0.212	0.96992	0.48
c6_all_v5	KRAS.LUNG.BREAST_UP.V1_DN	78	http://www.broadinstitute.org/gsea/msigdb/cards/KRAS.LUNG.BREAST_UP.V1_DN	0.26328	1.0676	0.3045	1	0.996	0.372	0.249	0.281	1	0.854
c6_all_v5	JAK2_DN.V1_DN	101	http://www.broadinstitute.org/gsea/msigdb/cards/JAK2_DN.V1_DN	0.27025	1.0652	0.3681	1	0.996	0.416	0.293	0.296	1	0.815
c6_all_v5	CRX_NRL_DN.V1_UP	101	http://www.broadinstitute.org/gsea/msigdb/cards/CRX_NRL_DN.V1_UP	0.26088	1.061	0.3252	1	0.996	0.277	0.182	0.228	1	0.782
c6_all_v5	CRX_NRL_DN.V1_DN	92	http://www.broadinstitute.org/gsea/msigdb/cards/CRX_NRL_DN.V1_DN	0.23522	1.0574	0.3377	1	0.997	0.217	0.182	0.179	1	0.732
c6_all_v5	PRC1_BMI_UP.V1_DN	116	http://www.broadinstitute.org/gsea/msigdb/cards/PRC1_BMI_UP.V1_DN	0.24143	1.0428	0.367	1	0.999	0.224	0.138	0.195	1	0.746
c6_all_v5	EGFR_UP.V1_DN	156	http://www.broadinstitute.org/gsea/msigdb/cards/EGFR_UP.V1_DN	0.26717	1.0389	0.3989	1	0.999	0.346	0.243	0.265	1	0.676
c6_all_v5	KRAS.LUNG_UP.V1_DN	71	http://www.broadinstitute.org/gsea/msigdb/cards/KRAS.LUNG_UP.V1_DN	0.26091	1.037	0.4111	1	0.999	0.268	0.179	0.221	1	0.602
c6_all_v5	ESC_V6.5_UP_EARLY.V1_UP	125	http://www.broadinstitute.org/gsea/msigdb/cards/ESC_V6.5_UP_EARLY.V1_UP	0.24656	1.0302	0.3979	1	0.999	0.192	0.0946	0.175	1	0.562
c6_all_v5	PRC2_SUZ12_UP.V1_DN	117	http://www.broadinstitute.org/gsea/msigdb/cards/PRC2_SUZ12_UP.V1_DN	0.2363	1.022	0.4113	1	0.999	0.274	0.203	0.22	1	0.543
c6_all_v5	RAF_UP.V1_DN	152	http://www.broadinstitute.org/gsea/msigdb/cards/RAF_UP.V1_DN	0.26054	0.9996	0.4454	1	1	0.329	0.231	0.256	1	0.604
c6_all_v5	DCA_UP.V1_DN	131	http://www.broadinstitute.org/gsea/msigdb/cards/DCA_UP.V1_DN	0.2102	0.99738	0.4974	1	1	0.26	0.233	0.201	1	0.541
c6_all_v5	CSR_LATE_UP.V1_DN	133	http://www.broadinstitute.org/gsea/msigdb/cards/CSR_LATE_UP.V1_DN	0.21709	0.89121	0.6793	1	1	0.293	0.219	0.231	1	0.575
c6_all_v5	HOXA9_DN.V1_DN	168	http://www.broadinstitute.org/gsea/msigdb/cards/HOXA9_DN.V1_DN	0.1569	0.69307	0.9879	1	1	0.256	0.231	0.199	1	0.64
c6_all_v5	PDGF_UP.V1_UP	125	http://www.broadinstitute.org/gsea/msigdb/cards/PDGF_UP.V1_UP	0.12431	0.61699	0.9958	1	1	0.336	0.329	0.227	1	0.802
c6_all_v5	EIF4E_DN	90	http://www.broadinstitute.org/gsea/msigdb/cards/EIF4E_DN	-0.21775	-0.80215	0.7678	1	1	0.178	0.14	0.154	1	0.562
h_all_v5	HALLMARK_HEDGEHOG_SIGNALING	30	http://www.broadinstitute.org/gsea/msigdb/cards/HALLMARK_HEDGEHOG_SIGNALING	0.3208	0.96147	0.51	1	0.993	0.233	0.066	0.218	1	0.762
h_all_v5	HALLMARK_G2M_CHECKPOINT	192	http://www.broadinstitute.org/gsea/msigdb/cards/HALLMARK_G2M_CHECKPOINT	0.27309	0.92302	0.5303	1	0.997	0.297	0.249	0.226	1	0.656
h_all_v5	HALLMARK_TGF_BETA_SIGNALING	51	http://www.broadinstitute.org/gsea/msigdb/cards/HALLMARK_TGF_BETA_SIGNALING	0.21149	0.78187	0.8265	1	0.999	0.157	0.07	0.146	1	0.623

## Sheet: EBV_Type
EBV genome Type: Type 1 vs Type 2
Gene Set Enrichment Analysis (GSEA) Results (FDR q < 0.25):
DataBaseName	Gene Set	SIZE	SOURCE	ES	NES	NOM p-val	FDR q-val	FWER p-val	Tag %	Gene %	Signal	FDR (median)	glob.p.val
c2_cp_v5	KEGG_TYROSINE_METABOLISM	27	http://www.broadinstitute.org/gsea/msigdb/cards/KEGG_TYROSINE_METABOLISM	-0.51968	-1.5154	0.05642	0.19968	0.975	0.519	0.183	0.424	0.12047	0.023
c2_cp_v5	REACTOME_RNA_POL_II_TRANSCRIPTION	95	http://www.broadinstitute.org/gsea/msigdb/cards/REACTOME_RNA_POL_II_TRANSCRIPTION	-0.38013	-1.5195	0.0989	0.20076	0.973	0.453	0.293	0.322	0.11863	0.024
c2_cp_v5	REACTOME_DNA_REPAIR	101	http://www.broadinstitute.org/gsea/msigdb/cards/REACTOME_DNA_REPAIR	-0.38547	-1.5157	0.04223	0.20276	0.975	0.436	0.298	0.308	0.1223	0.024
c2_cp_v5	REACTOME_CA_DEPENDENT_EVENTS	26	http://www.broadinstitute.org/gsea/msigdb/cards/REACTOME_CA_DEPENDENT_EVENTS	-0.45544	-1.5196	0.01808	0.20426	0.973	0.308	0.148	0.263	0.12071	0.025
c2_cp_v5	REACTOME_DOWNSTREAM_SIGNALING_EVENTS_OF_B_CELL_RECEPTOR_BCR	88	http://www.broadinstitute.org/gsea/msigdb/cards/REACTOME_DOWNSTREAM_SIGNALING_EVENTS_OF_B_CELL_RECEPTOR_BCR	-0.40135	-1.539	0.06306	0.20445	0.957	0.352	0.219	0.277	0.11748	0.028
c2_cp_v5	REACTOME_METABOLISM_OF_NON_CODING_RNA	48	http://www.broadinstitute.org/gsea/msigdb/cards/REACTOME_METABOLISM_OF_NON_CODING_RNA	-0.5386	-1.5766	0.07073	0.20451	0.925	0.521	0.298	0.367	0.10721	0.031
c2_cp_v5	REACTOME_RNA_POL_III_TRANSCRIPTION_INITIATION_FROM_TYPE_3_PROMOTER	26	http://www.broadinstitute.org/gsea/msigdb/cards/REACTOME_RNA_POL_III_TRANSCRIPTION_INITIATION_FROM_TYPE_3_PROMOTER	-0.49907	-1.5357	0.05751	0.2048	0.959	0.5	0.223	0.389	0.12021	0.027
c2_cp_v5	REACTOME_TELOMERE_MAINTENANCE	35	http://www.broadinstitute.org/gsea/msigdb/cards/REACTOME_TELOMERE_MAINTENANCE	-0.54394	-1.5412	0.09899	0.20513	0.956	0.514	0.298	0.362	0.11745	0.028
c2_cp_v5	REACTOME_NUCLEOTIDE_EXCISION_REPAIR	47	http://www.broadinstitute.org/gsea/msigdb/cards/REACTOME_NUCLEOTIDE_EXCISION_REPAIR	-0.49031	-1.5624	0.05028	0.20613	0.939	0.574	0.298	0.405	0.11028	0.029
c2_cp_v5	KEGG_BASAL_TRANSCRIPTION_FACTORS	30	http://www.broadinstitute.org/gsea/msigdb/cards/KEGG_BASAL_TRANSCRIPTION_FACTORS	-0.42562	-1.5433	0.07073	0.20621	0.954	0.4	0.256	0.298	0.11807	0.028
c2_cp_v5	REACTOME_TRANSCRIPTION_COUPLED_NER_TC_NER	42	http://www.broadinstitute.org/gsea/msigdb/cards/REACTOME_TRANSCRIPTION_COUPLED_NER_TC_NER	-0.50198	-1.556	0.05072	0.20622	0.945	0.595	0.298	0.419	0.11489	0.028
c2_cp_v5	REACTOME_METABOLISM_OF_MRNA	128	http://www.broadinstitute.org/gsea/msigdb/cards/REACTOME_METABOLISM_OF_MRNA	-0.41269	-1.5496	0.1038	0.20643	0.95	0.344	0.237	0.265	0.11684	0.028
c2_cp_v5	KEGG_AMINOACYL_TRNA_BIOSYNTHESIS	40	http://www.broadinstitute.org/gsea/msigdb/cards/KEGG_AMINOACYL_TRNA_BIOSYNTHESIS	-0.56848	-1.5653	0.08713	0.20663	0.934	0.625	0.318	0.428	0.11148	0.029
c2_cp_v5	BIOCARTA_PROTEASOME_PATHWAY	28	http://www.broadinstitute.org/gsea/msigdb/cards/BIOCARTA_PROTEASOME_PATHWAY	-0.66561	-1.5201	0.06371	0.20708	0.973	0.607	0.21	0.481	0.122	0.025
c2_cp_v5	REACTOME_ANTIGEN_PROCESSING_CROSS_PRESENTATION	63	http://www.broadinstitute.org/gsea/msigdb/cards/REACTOME_ANTIGEN_PROCESSING_CROSS_PRESENTATION	-0.56297	-1.5714	0.04064	0.20725	0.93	0.492	0.222	0.385	0.10854	0.03
c2_cp_v5	BIOCARTA_NO1_PATHWAY	26	http://www.broadinstitute.org/gsea/msigdb/cards/BIOCARTA_NO1_PATHWAY	-0.50747	-1.5307	0.008666	0.20727	0.963	0.654	0.331	0.439	0.12157	0.028
c2_cp_v5	KEGG_NUCLEOTIDE_EXCISION_REPAIR	43	http://www.broadinstitute.org/gsea/msigdb/cards/KEGG_NUCLEOTIDE_EXCISION_REPAIR	-0.46921	-1.525	0.08068	0.20775	0.967	0.535	0.298	0.377	0.12126	0.026
c2_cp_v5	REACTOME_TRANSCRIPTION	143	http://www.broadinstitute.org/gsea/msigdb/cards/REACTOME_TRANSCRIPTION	-0.35841	-1.5216	0.08835	0.20852	0.972	0.441	0.293	0.315	0.12245	0.025
c2_cp_v5	REACTOME_EXTENSION_OF_TELOMERES	27	http://www.broadinstitute.org/gsea/msigdb/cards/REACTOME_EXTENSION_OF_TELOMERES	-0.55305	-1.5064	0.1302	0.20855	0.977	0.556	0.298	0.391	0.12545	0.022
c2_cp_v5	REACTOME_CLASS_I_MHC_MEDIATED_ANTIGEN_PROCESSING_PRESENTATION	211	http://www.broadinstitute.org/gsea/msigdb/cards/REACTOME_CLASS_I_MHC_MEDIATED_ANTIGEN_PROCESSING_PRESENTATION	-0.33878	-1.5266	0.05292	0.20957	0.966	0.246	0.155	0.212	0.1217	0.027
c2_cp_v5	REACTOME_CDT1_ASSOCIATION_WITH_THE_CDC6_ORC_ORIGIN_COMPLEX	52	http://www.broadinstitute.org/gsea/msigdb/cards/REACTOME_CDT1_ASSOCIATION_WITH_THE_CDC6_ORC_ORIGIN_COMPLEX	-0.60461	-1.5768	0.0412	0.20973	0.924	0.519	0.21	0.412	0.11011	0.034
c2_cp_v5	KEGG_SPLICEOSOME	124	http://www.broadinstitute.org/gsea/msigdb/cards/KEGG_SPLICEOSOME	-0.43315	-1.5439	0.1209	0.20998	0.954	0.435	0.3	0.308	0.12053	0.029
c2_cp_v5	REACTOME_BIOSYNTHESIS_OF_THE_N_GLYCAN_PRECURSOR_DOLICHOL_LIPID_LINKED_OLIGOSACCHARIDE_LLO_AND_TRANSFER_TO_A_NASCENT_PROTEIN	28	http://www.broadinstitute.org/gsea/msigdb/cards/REACTOME_BIOSYNTHESIS_OF_THE_N_GLYCAN_PRECURSOR_DOLICHOL_LIPID_LINKED_OLIGOSACCHARIDE_LLO_AND_TRANSFER_TO_A_NASCENT_PROTEIN	-0.56941	-1.5564	0.04391	0.21049	0.945	0.357	0.09	0.326	0.11733	0.029
c2_cp_v5	REACTOME_ORC1_REMOVAL_FROM_CHROMATIN	62	http://www.broadinstitute.org/gsea/msigdb/cards/REACTOME_ORC1_REMOVAL_FROM_CHROMATIN	-0.5202	-1.4998	0.09761	0.21064	0.98	0.452	0.21	0.358	0.12964	0.022
c2_cp_v5	REACTOME_ANTIGEN_PROCESSING_UBIQUITINATION_PROTEASOME_DEGRADATION	181	http://www.broadinstitute.org/gsea/msigdb/cards/REACTOME_ANTIGEN_PROCESSING_UBIQUITINATION_PROTEASOME_DEGRADATION	-0.3396	-1.566	0.04647	0.21081	0.934	0.243	0.155	0.208	0.11413	0.03
c2_cp_v5	REACTOME_CELL_CYCLE_CHECKPOINTS	108	http://www.broadinstitute.org/gsea/msigdb/cards/REACTOME_CELL_CYCLE_CHECKPOINTS	-0.49414	-1.5021	0.09497	0.21088	0.979	0.361	0.175	0.3	0.1298	0.022
c2_cp_v5	KEGG_TRYPTOPHAN_METABOLISM	29	http://www.broadinstitute.org/gsea/msigdb/cards/KEGG_TRYPTOPHAN_METABOLISM	-0.54678	-1.5498	0.02011	0.2109	0.95	0.552	0.287	0.394	0.11944	0.029
c2_cp_v5	REACTOME_AUTODEGRADATION_OF_CDH1_BY_CDH1_APC_C	53	http://www.broadinstitute.org/gsea/msigdb/cards/REACTOME_AUTODEGRADATION_OF_CDH1_BY_CDH1_APC_C	-0.64403	-1.5785	0.03605	0.21283	0.923	0.547	0.21	0.434	0.11145	0.035
c2_cp_v5	REACTOME_S_PHASE	103	http://www.broadinstitute.org/gsea/msigdb/cards/REACTOME_S_PHASE	-0.48431	-1.4924	0.1149	0.21396	0.985	0.408	0.21	0.325	0.13406	0.022
c2_cp_v5	KEGG_VALINE_LEUCINE_AND_ISOLEUCINE_DEGRADATION	42	http://www.broadinstitute.org/gsea/msigdb/cards/KEGG_VALINE_LEUCINE_AND_ISOLEUCINE_DEGRADATION	-0.51728	-1.4886	0.06844	0.21624	0.987	0.595	0.277	0.432	0.13643	0.022
c2_cp_v5	REACTOME_RNA_POL_I_RNA_POL_III_AND_MITOCHONDRIAL_TRANSCRIPTION	63	http://www.broadinstitute.org/gsea/msigdb/cards/REACTOME_RNA_POL_I_RNA_POL_III_AND_MITOCHONDRIAL_TRANSCRIPTION	-0.43514	-1.6001	0.03455	0.21625	0.894	0.46	0.233	0.355	0.10732	0.038
c2_cp_v5	REACTOME_MRNA_SPLICING	105	http://www.broadinstitute.org/gsea/msigdb/cards/REACTOME_MRNA_SPLICING	-0.39737	-1.4925	0.1344	0.21725	0.985	0.39	0.293	0.278	0.13615	0.022
c2_cp_v5	REACTOME_ASSEMBLY_OF_THE_PRE_REPLICATIVE_COMPLEX	60	http://www.broadinstitute.org/gsea/msigdb/cards/REACTOME_ASSEMBLY_OF_THE_PRE_REPLICATIVE_COMPLEX	-0.56635	-1.5792	0.07579	0.21799	0.922	0.467	0.21	0.37	0.11364	0.038
c2_cp_v5	REACTOME_PERK_REGULATED_GENE_EXPRESSION	25	http://www.broadinstitute.org/gsea/msigdb/cards/REACTOME_PERK_REGULATED_GENE_EXPRESSION	-0.57122	-1.6167	0.04049	0.21862	0.857	0.72	0.271	0.526	0.10918	0.042
c2_cp_v5	REACTOME_APC_C_CDH1_MEDIATED_DEGRADATION_OF_CDC20_AND_OTHER_APC_C_CDH1_TARGETED_PROTEINS_IN_LATE_MITOSIS_EARLY_G1	61	http://www.broadinstitute.org/gsea/msigdb/cards/REACTOME_APC_C_CDH1_MEDIATED_DEGRADATION_OF_CDC20_AND_OTHER_APC_C_CDH1_TARGETED_PROTEINS_IN_LATE_MITOSIS_EARLY_G1	-0.61914	-1.612	0.04771	0.21922	0.875	0.508	0.21	0.403	0.11022	0.04
c2_cp_v5	REACTOME_CYCLIN_E_ASSOCIATED_EVENTS_DURING_G1_S_TRANSITION_	59	http://www.broadinstitute.org/gsea/msigdb/cards/REACTOME_CYCLIN_E_ASSOCIATED_EVENTS_DURING_G1_S_TRANSITION_	-0.56776	-1.6068	0.02669	0.2202	0.883	0.525	0.21	0.417	0.10976	0.04
c2_cp_v5	REACTOME_RNA_POL_II_TRANSCRIPTION_PRE_INITIATION_AND_PROMOTER_OPENING	39	http://www.broadinstitute.org/gsea/msigdb/cards/REACTOME_RNA_POL_II_TRANSCRIPTION_PRE_INITIATION_AND_PROMOTER_OPENING	-0.46991	-1.4827	0.07554	0.22103	0.987	0.538	0.292	0.383	0.14208	0.021
c2_cp_v5	REACTOME_P53_INDEPENDENT_G1_S_DNA_DAMAGE_CHECKPOINT	46	http://www.broadinstitute.org/gsea/msigdb/cards/REACTOME_P53_INDEPENDENT_G1_S_DNA_DAMAGE_CHECKPOINT	-0.62509	-1.601	0.04404	0.2223	0.893	0.543	0.21	0.431	0.11079	0.042
c2_cp_v5	REACTOME_GLOBAL_GENOMIC_NER_GG_NER	32	http://www.broadinstitute.org/gsea/msigdb/cards/REACTOME_GLOBAL_GENOMIC_NER_GG_NER	-0.52553	-1.5804	0.05709	0.22244	0.921	0.562	0.298	0.396	0.11676	0.038
c2_cp_v5	REACTOME_ACTIVATION_OF_NF_KAPPAB_IN_B_CELLS	58	http://www.broadinstitute.org/gsea/msigdb/cards/REACTOME_ACTIVATION_OF_NF_KAPPAB_IN_B_CELLS	-0.54625	-1.6188	0.05678	0.22369	0.851	0.483	0.21	0.383	0.10808	0.043
c2_cp_v5	KEGG_FATTY_ACID_METABOLISM	33	http://www.broadinstitute.org/gsea/msigdb/cards/KEGG_FATTY_ACID_METABOLISM	-0.51427	-1.5819	0.02541	0.22606	0.92	0.576	0.281	0.415	0.11806	0.038
c2_cp_v5	REACTOME_CLEAVAGE_OF_GROWING_TRANSCRIPT_IN_THE_TERMINATION_REGION_	42	http://www.broadinstitute.org/gsea/msigdb/cards/REACTOME_CLEAVAGE_OF_GROWING_TRANSCRIPT_IN_THE_TERMINATION_REGION_	-0.42489	-1.5848	0.06263	0.22813	0.914	0.452	0.293	0.321	0.11803	0.039
c2_cp_v5	KEGG_PROTEASOME	43	http://www.broadinstitute.org/gsea/msigdb/cards/KEGG_PROTEASOME	-0.67591	-1.625	0.02602	0.23129	0.84	0.605	0.21	0.479	0.1109	0.048
c2_cp_v5	REACTOME_METABOLISM_OF_RNA	173	http://www.broadinstitute.org/gsea/msigdb/cards/REACTOME_METABOLISM_OF_RNA	-0.44833	-1.619	0.06589	0.23271	0.85	0.376	0.237	0.29	0.11258	0.047
c2_cp_v5	REACTOME_PROCESSING_OF_CAPPED_INTRON_CONTAINING_PRE_MRNA	134	http://www.broadinstitute.org/gsea/msigdb/cards/REACTOME_PROCESSING_OF_CAPPED_INTRON_CONTAINING_PRE_MRNA	-0.40459	-1.5852	0.09711	0.23494	0.914	0.403	0.298	0.286	0.12101	0.042
c2_cp_v5	REACTOME_TRNA_AMINOACYLATION	41	http://www.broadinstitute.org/gsea/msigdb/cards/REACTOME_TRNA_AMINOACYLATION	-0.5724	-1.4703	0.1377	0.23494	0.991	0.707	0.344	0.466	0.15354	0.027
c2_cp_v5	REACTOME_VIF_MEDIATED_DEGRADATION_OF_APOBEC3G	47	http://www.broadinstitute.org/gsea/msigdb/cards/REACTOME_VIF_MEDIATED_DEGRADATION_OF_APOBEC3G	-0.68168	-1.6335	0.02559	0.23637	0.826	0.596	0.21	0.472	0.11126	0.052
c2_cp_v5	REACTOME_ER_PHAGOSOME_PATHWAY	50	http://www.broadinstitute.org/gsea/msigdb/cards/REACTOME_ER_PHAGOSOME_PATHWAY	-0.65757	-1.6265	0.02368	0.23847	0.836	0.58	0.21	0.46	0.11321	0.051
c2_cp_v5	REACTOME_SYNTHESIS_OF_DNA	87	http://www.broadinstitute.org/gsea/msigdb/cards/REACTOME_SYNTHESIS_OF_DNA	-0.49521	-1.4607	0.1434	0.24502	0.993	0.529	0.298	0.373	0.16293	0.027
c2_cp_v5	KEGG_DNA_REPLICATION	36	http://www.broadinstitute.org/gsea/msigdb/cards/KEGG_DNA_REPLICATION	-0.53176	-1.4483	0.1663	0.24649	0.996	0.583	0.319	0.398	0.16632	0.024
c2_cp_v5	REACTOME_ASSOCIATION_OF_TRIC_CCT_WITH_TARGET_PROTEINS_DURING_BIOSYNTHESIS	26	http://www.broadinstitute.org/gsea/msigdb/cards/REACTOME_ASSOCIATION_OF_TRIC_CCT_WITH_TARGET_PROTEINS_DURING_BIOSYNTHESIS	-0.42102	-1.4505	0.1032	0.24663	0.996	0.538	0.361	0.345	0.16494	0.026
c2_cp_v5	REACTOME_G1_S_TRANSITION	103	http://www.broadinstitute.org/gsea/msigdb/cards/REACTOME_G1_S_TRANSITION	-0.46053	-1.4437	0.1389	0.24694	0.999	0.388	0.21	0.309	0.16631	0.022
c2_cp_v5	REACTOME_INFLUENZA_LIFE_CYCLE	55	http://www.broadinstitute.org/gsea/msigdb/cards/REACTOME_INFLUENZA_LIFE_CYCLE	-0.43611	-1.4454	0.1293	0.24758	0.998	0.436	0.298	0.307	0.16579	0.024
c2_cp_v5	REACTOME_REGULATION_OF_APOPTOSIS	52	http://www.broadinstitute.org/gsea/msigdb/cards/REACTOME_REGULATION_OF_APOPTOSIS	-0.55906	-1.6336	0.03273	0.24805	0.826	0.481	0.21	0.381	0.11613	0.055
c2_cp_v5	REACTOME_FORMATION_OF_TRANSCRIPTION_COUPLED_NER_TC_NER_REPAIR_COMPLEX	27	http://www.broadinstitute.org/gsea/msigdb/cards/REACTOME_FORMATION_OF_TRANSCRIPTION_COUPLED_NER_TC_NER_REPAIR_COMPLEX	-0.50991	-1.4511	0.1063	0.24931	0.995	0.519	0.211	0.41	0.16461	0.027
c2_cp_v5	REACTOME_MITOCHONDRIAL_PROTEIN_IMPORT	49	http://www.broadinstitute.org/gsea/msigdb/cards/REACTOME_MITOCHONDRIAL_PROTEIN_IMPORT	-0.5485	-1.4352	0.1332	0.2495	0.999	0.429	0.185	0.351	0.17104	0.021
c2_cp_v5	REACTOME_LIPID_DIGESTION_MOBILIZATION_AND_TRANSPORT	36	http://www.broadinstitute.org/gsea/msigdb/cards/REACTOME_LIPID_DIGESTION_MOBILIZATION_AND_TRANSPORT	-0.51201	-1.4527	0.03617	0.25047	0.994	0.472	0.247	0.356	0.16446	0.027
c2_cp_v5	REACTOME_HIV_LIFE_CYCLE	107	http://www.broadinstitute.org/gsea/msigdb/cards/REACTOME_HIV_LIFE_CYCLE	-0.35315	-1.439	0.1196	0.25069	0.999	0.43	0.298	0.304	0.17291	0.021
c2_cp_v5	REACTOME_LATE_PHASE_OF_HIV_LIFE_CYCLE	94	http://www.broadinstitute.org/gsea/msigdb/cards/REACTOME_LATE_PHASE_OF_HIV_LIFE_CYCLE	-0.36254	-1.4362	0.1196	0.25135	0.999	0.436	0.298	0.308	0.17242	0.021
c2_cp_v5	REACTOME_M_G1_TRANSITION	75	http://www.broadinstitute.org/gsea/msigdb/cards/REACTOME_M_G1_TRANSITION	-0.50487	-1.4543	0.1381	0.25149	0.994	0.533	0.298	0.376	0.16507	0.027
c2_cp_v5	REACTOME_APC_C_CDC20_MEDIATED_DEGRADATION_OF_MITOTIC_PROTEINS	62	http://www.broadinstitute.org/gsea/msigdb/cards/REACTOME_APC_C_CDC20_MEDIATED_DEGRADATION_OF_MITOTIC_PROTEINS	-0.64571	-1.6379	0.02899	0.25208	0.815	0.548	0.21	0.435	0.1142	0.057
c2_cp_v5	REACTOME_HIV_INFECTION	183	http://www.broadinstitute.org/gsea/msigdb/cards/REACTOME_HIV_INFECTION	-0.42066	-1.6427	0.04806	0.2552	0.803	0.366	0.212	0.293	0.11399	0.06
c2_cp_v5	REACTOME_DNA_STRAND_ELONGATION	30	http://www.broadinstitute.org/gsea/msigdb/cards/REACTOME_DNA_STRAND_ELONGATION	-0.56861	-1.4279	0.1602	0.25706	1	0.5	0.293	0.354	0.17943	0.024
c2_cp_v5	REACTOME_REGULATION_OF_MRNA_STABILITY_BY_PROTEINS_THAT_BIND_AU_RICH_ELEMENTS	79	http://www.broadinstitute.org/gsea/msigdb/cards/REACTOME_REGULATION_OF_MRNA_STABILITY_BY_PROTEINS_THAT_BIND_AU_RICH_ELEMENTS	-0.5049	-1.6481	0.06118	0.25853	0.792	0.392	0.197	0.317	0.11335	0.058
c2_cp_v5	REACTOME_MITOTIC_M_M_G1_PHASES	159	http://www.broadinstitute.org/gsea/msigdb/cards/REACTOME_MITOTIC_M_M_G1_PHASES	-0.44393	-1.4228	0.1728	0.26123	1	0.522	0.338	0.35	0.18132	0.023
c2_cp_v5	KEGG_PYRIMIDINE_METABOLISM	88	http://www.broadinstitute.org/gsea/msigdb/cards/KEGG_PYRIMIDINE_METABOLISM	-0.35732	-1.4205	0.09237	0.26158	1	0.455	0.317	0.312	0.18134	0.02
c2_cp_v5	REACTOME_MRNA_PROCESSING	151	http://www.broadinstitute.org/gsea/msigdb/cards/REACTOME_MRNA_PROCESSING	-0.39924	-1.6596	0.07347	0.26601	0.761	0.411	0.298	0.291	0.11454	0.063
c2_cp_v5	REACTOME_REGULATION_OF_ORNITHINE_DECARBOXYLASE_ODC	47	http://www.broadinstitute.org/gsea/msigdb/cards/REACTOME_REGULATION_OF_ORNITHINE_DECARBOXYLASE_ODC	-0.6554	-1.651	0.02458	0.26881	0.787	0.617	0.236	0.473	0.11702	0.062
c2_cp_v5	REACTOME_PHOSPHOLIPASE_C_MEDIATED_CASCADE	35	http://www.broadinstitute.org/gsea/msigdb/cards/REACTOME_PHOSPHOLIPASE_C_MEDIATED_CASCADE	-0.41621	-1.4058	0.05882	0.27103	1	0.314	0.148	0.269	0.19624	0.019
c2_cp_v5	REACTOME_SIGNALING_BY_THE_B_CELL_RECEPTOR_BCR	117	http://www.broadinstitute.org/gsea/msigdb/cards/REACTOME_SIGNALING_BY_THE_B_CELL_RECEPTOR_BCR	-0.31943	-1.408	0.1002	0.27126	1	0.291	0.21	0.232	0.19594	0.02
c2_cp_v5	REACTOME_REGULATION_OF_GLUCOKINASE_BY_GLUCOKINASE_REGULATORY_PROTEIN	25	http://www.broadinstitute.org/gsea/msigdb/cards/REACTOME_REGULATION_OF_GLUCOKINASE_BY_GLUCOKINASE_REGULATORY_PROTEIN	-0.45972	-1.4097	0.1614	0.27196	1	0.44	0.298	0.309	0.19466	0.022
c2_cp_v5	REACTOME_NEP_NS2_INTERACTS_WITH_THE_CELLULAR_EXPORT_MACHINERY	27	http://www.broadinstitute.org/gsea/msigdb/cards/REACTOME_NEP_NS2_INTERACTS_WITH_THE_CELLULAR_EXPORT_MACHINERY	-0.46561	-1.4109	0.1663	0.2734	1	0.63	0.404	0.376	0.19643	0.024
c2_cp_v5	KEGG_RNA_POLYMERASE	29	http://www.broadinstitute.org/gsea/msigdb/cards/KEGG_RNA_POLYMERASE	-0.47418	-1.4005	0.1382	0.27574	1	0.414	0.216	0.325	0.20081	0.02
c2_cp_v5	REACTOME_TRANSPORT_OF_MATURE_MRNA_DERIVED_FROM_AN_INTRONLESS_TRANSCRIPT	32	http://www.broadinstitute.org/gsea/msigdb/cards/REACTOME_TRANSPORT_OF_MATURE_MRNA_DERIVED_FROM_AN_INTRONLESS_TRANSCRIPT	-0.40855	-1.3966	0.1761	0.27827	1	0.406	0.333	0.272	0.20413	0.019
c2_cp_v5	REACTOME_MRNA_SPLICING_MINOR_PATHWAY	42	http://www.broadinstitute.org/gsea/msigdb/cards/REACTOME_MRNA_SPLICING_MINOR_PATHWAY	-0.51897	-1.3929	0.1685	0.2808	1	0.524	0.292	0.372	0.20455	0.02
c2_cp_v5	REACTOME_REGULATION_OF_MITOTIC_CELL_CYCLE	72	http://www.broadinstitute.org/gsea/msigdb/cards/REACTOME_REGULATION_OF_MITOTIC_CELL_CYCLE	-0.62141	-1.66	0.02683	0.28412	0.761	0.514	0.21	0.408	0.12166	0.066
c2_cp_v5	REACTOME_MITOTIC_G1_G1_S_PHASES	125	http://www.broadinstitute.org/gsea/msigdb/cards/REACTOME_MITOTIC_G1_G1_S_PHASES	-0.41032	-1.3814	0.1648	0.29459	1	0.304	0.175	0.253	0.216	0.023
c2_cp_v5	REACTOME_CROSS_PRESENTATION_OF_SOLUBLE_EXOGENOUS_ANTIGENS_ENDOSOMES	45	http://www.broadinstitute.org/gsea/msigdb/cards/REACTOME_CROSS_PRESENTATION_OF_SOLUBLE_EXOGENOUS_ANTIGENS_ENDOSOMES	-0.64246	-1.6632	0.02883	0.29761	0.752	0.578	0.21	0.458	0.12613	0.069
c2_cp_v5	KEGG_GLYCINE_SERINE_AND_THREONINE_METABOLISM	25	http://www.broadinstitute.org/gsea/msigdb/cards/KEGG_GLYCINE_SERINE_AND_THREONINE_METABOLISM	-0.44414	-1.369	0.09242	0.30073	1	0.36	0.183	0.295	0.22672	0.019
c2_cp_v5	KEGG_CITRATE_CYCLE_TCA_CYCLE	27	http://www.broadinstitute.org/gsea/msigdb/cards/KEGG_CITRATE_CYCLE_TCA_CYCLE	-0.48472	-1.3752	0.188	0.30098	1	0.593	0.311	0.409	0.22245	0.023
c2_cp_v5	KEGG_ARGININE_AND_PROLINE_METABOLISM	43	http://www.broadinstitute.org/gsea/msigdb/cards/KEGG_ARGININE_AND_PROLINE_METABOLISM	-0.42561	-1.3662	0.09208	0.30173	1	0.372	0.183	0.305	0.22634	0.018
c2_cp_v5	REACTOME_CHROMOSOME_MAINTENANCE	73	http://www.broadinstitute.org/gsea/msigdb/cards/REACTOME_CHROMOSOME_MAINTENANCE	-0.41279	-1.3635	0.1734	0.30274	1	0.452	0.31	0.314	0.2308	0.018
c2_cp_v5	REACTOME_LIPOPROTEIN_METABOLISM	25	http://www.broadinstitute.org/gsea/msigdb/cards/REACTOME_LIPOPROTEIN_METABOLISM	-0.54747	-1.3711	0.09722	0.30384	1	0.52	0.247	0.392	0.22818	0.023
c2_cp_v5	REACTOME_INTERACTIONS_OF_VPR_WITH_HOST_CELLULAR_PROTEINS	32	http://www.broadinstitute.org/gsea/msigdb/cards/REACTOME_INTERACTIONS_OF_VPR_WITH_HOST_CELLULAR_PROTEINS	-0.4078	-1.369	0.1875	0.30384	1	0.344	0.236	0.263	0.22845	0.021
c2_cp_v5	REACTOME_DNA_REPLICATION	178	http://www.broadinstitute.org/gsea/msigdb/cards/REACTOME_DNA_REPLICATION	-0.42245	-1.3539	0.2118	0.3057	1	0.511	0.338	0.343	0.23462	0.018
c2_cp_v5	REACTOME_FORMATION_OF_THE_HIV1_EARLY_ELONGATION_COMPLEX	28	http://www.broadinstitute.org/gsea/msigdb/cards/REACTOME_FORMATION_OF_THE_HIV1_EARLY_ELONGATION_COMPLEX	-0.50563	-1.3545	0.1924	0.30793	1	0.464	0.211	0.367	0.23614	0.019
c2_cp_v5	REACTOME_GLUCOSE_TRANSPORT	32	http://www.broadinstitute.org/gsea/msigdb/cards/REACTOME_GLUCOSE_TRANSPORT	-0.43333	-1.3555	0.1717	0.30936	1	0.438	0.3	0.307	0.23736	0.02
c2_cp_v5	REACTOME_DESTABILIZATION_OF_MRNA_BY_AUF1_HNRNP_D0	48	http://www.broadinstitute.org/gsea/msigdb/cards/REACTOME_DESTABILIZATION_OF_MRNA_BY_AUF1_HNRNP_D0	-0.6321	-1.668	0.03718	0.31026	0.743	0.521	0.21	0.413	0.12791	0.073
c2_cp_v5	KEGG_PPAR_SIGNALING_PATHWAY	50	http://www.broadinstitute.org/gsea/msigdb/cards/KEGG_PPAR_SIGNALING_PATHWAY	-0.43196	-1.3568	0.07953	0.3104	1	0.32	0.12	0.283	0.23735	0.019
c2_cp_v5	REACTOME_CDK_MEDIATED_PHOSPHORYLATION_AND_REMOVAL_OF_CDC6	44	http://www.broadinstitute.org/gsea/msigdb/cards/REACTOME_CDK_MEDIATED_PHOSPHORYLATION_AND_REMOVAL_OF_CDC6	-0.66558	-1.6692	0.02564	0.33489	0.742	0.568	0.21	0.45	0.13559	0.081
c2_cp_v5	KEGG_OXIDATIVE_PHOSPHORYLATION	103	http://www.broadinstitute.org/gsea/msigdb/cards/KEGG_OXIDATIVE_PHOSPHORYLATION	-0.54206	-1.3228	0.2222	0.35323	1	0.602	0.27	0.443	0.28477	0.023
c2_cp_v5	REACTOME_RNA_POL_I_TRANSCRIPTION	30	http://www.broadinstitute.org/gsea/msigdb/cards/REACTOME_RNA_POL_I_TRANSCRIPTION	-0.5414	-1.6739	0.02559	0.35374	0.733	0.533	0.216	0.419	0.1384	0.084
c2_cp_v5	BIOCARTA_MPR_PATHWAY	29	http://www.broadinstitute.org/gsea/msigdb/cards/BIOCARTA_MPR_PATHWAY	-0.41317	-1.3178	0.1639	0.35465	1	0.552	0.331	0.37	0.28947	0.022
c2_cp_v5	REACTOME_REGULATION_OF_WATER_BALANCE_BY_RENAL_AQUAPORINS	31	http://www.broadinstitute.org/gsea/msigdb/cards/REACTOME_REGULATION_OF_WATER_BALANCE_BY_RENAL_AQUAPORINS	-0.40503	-1.3182	0.1354	0.35732	1	0.452	0.296	0.319	0.29163	0.023
c2_cp_v5	KEGG_PARKINSONS_DISEASE	99	http://www.broadinstitute.org/gsea/msigdb/cards/KEGG_PARKINSONS_DISEASE	-0.52407	-1.3062	0.2198	0.36797	1	0.576	0.273	0.422	0.29984	0.023
c2_cp_v5	REACTOME_AQUAPORIN_MEDIATED_TRANSPORT	32	http://www.broadinstitute.org/gsea/msigdb/cards/REACTOME_AQUAPORIN_MEDIATED_TRANSPORT	-0.39703	-1.308	0.1413	0.36841	1	0.281	0.148	0.24	0.30195	0.023
c2_cp_v5	REACTOME_DEADENYLATION_DEPENDENT_MRNA_DECAY	43	http://www.broadinstitute.org/gsea/msigdb/cards/REACTOME_DEADENYLATION_DEPENDENT_MRNA_DECAY	-0.37029	-1.2985	0.2008	0.3774	1	0.395	0.275	0.288	0.31356	0.024
c2_cp_v5	REACTOME_SRP_DEPENDENT_COTRANSLATIONAL_PROTEIN_TARGETING_TO_MEMBRANE	28	http://www.broadinstitute.org/gsea/msigdb/cards/REACTOME_SRP_DEPENDENT_COTRANSLATIONAL_PROTEIN_TARGETING_TO_MEMBRANE	-0.54696	-1.2961	0.2313	0.37784	1	0.5	0.249	0.376	0.31674	0.023
c2_cp_v5	REACTOME_SCFSKP2_MEDIATED_DEGRADATION_OF_P27_P21	50	http://www.broadinstitute.org/gsea/msigdb/cards/REACTOME_SCFSKP2_MEDIATED_DEGRADATION_OF_P27_P21	-0.64512	-1.6764	0.01639	0.38449	0.725	0.58	0.21	0.46	0.14871	0.097
c2_cp_v5	REACTOME_CELL_CYCLE	341	http://www.broadinstitute.org/gsea/msigdb/cards/REACTOME_CELL_CYCLE	-0.33007	-1.2826	0.2265	0.38683	1	0.378	0.301	0.271	0.32725	0.022
c2_cp_v5	REACTOME_RESPIRATORY_ELECTRON_TRANSPORT	63	http://www.broadinstitute.org/gsea/msigdb/cards/REACTOME_RESPIRATORY_ELECTRON_TRANSPORT	-0.62676	-1.284	0.2033	0.38793	1	0.698	0.273	0.51	0.32883	0.023
c2_cp_v5	REACTOME_CELL_CYCLE_MITOTIC	295	http://www.broadinstitute.org/gsea/msigdb/cards/REACTOME_CELL_CYCLE_MITOTIC	-0.34335	-1.2874	0.239	0.38926	1	0.393	0.301	0.281	0.32775	0.025
c2_cp_v5	REACTOME_RESPIRATORY_ELECTRON_TRANSPORT_ATP_SYNTHESIS_BY_CHEMIOSMOTIC_COUPLING_AND_HEAT_PRODUCTION_BY_UNCOUPLING_PROTEINS_	77	http://www.broadinstitute.org/gsea/msigdb/cards/REACTOME_RESPIRATORY_ELECTRON_TRANSPORT_ATP_SYNTHESIS_BY_CHEMIOSMOTIC_COUPLING_AND_HEAT_PRODUCTION_BY_UNCOUPLING_PROTEINS_	-0.60781	-1.2849	0.2112	0.38972	1	0.714	0.297	0.505	0.32911	0.025
c2_cp_v5	REACTOME_RNA_POL_II_PRE_TRANSCRIPTION_EVENTS	53	http://www.broadinstitute.org/gsea/msigdb/cards/REACTOME_RNA_POL_II_PRE_TRANSCRIPTION_EVENTS	-0.36975	-1.2713	0.2184	0.40342	1	0.453	0.292	0.322	0.34884	0.023
c2_cp_v5	REACTOME_P53_DEPENDENT_G1_DNA_DAMAGE_RESPONSE	51	http://www.broadinstitute.org/gsea/msigdb/cards/REACTOME_P53_DEPENDENT_G1_DNA_DAMAGE_RESPONSE	-0.59818	-1.6821	0.02355	0.41075	0.707	0.51	0.21	0.404	0.14921	0.107
c2_cp_v5	REACTOME_MRNA_3_END_PROCESSING	33	http://www.broadinstitute.org/gsea/msigdb/cards/REACTOME_MRNA_3_END_PROCESSING	-0.30592	-1.2562	0.2159	0.42676	1	0.364	0.293	0.258	0.37235	0.029
c2_cp_v5	REACTOME_FORMATION_OF_RNA_POL_II_ELONGATION_COMPLEX_	37	http://www.broadinstitute.org/gsea/msigdb/cards/REACTOME_FORMATION_OF_RNA_POL_II_ELONGATION_COMPLEX_	-0.41583	-1.2345	0.2881	0.42956	1	0.486	0.292	0.346	0.38381	0.02
c2_cp_v5	REACTOME_TRANSPORT_OF_RIBONUCLEOPROTEINS_INTO_THE_HOST_NUCLEUS	27	http://www.broadinstitute.org/gsea/msigdb/cards/REACTOME_TRANSPORT_OF_RIBONUCLEOPROTEINS_INTO_THE_HOST_NUCLEUS	-0.39524	-1.2512	0.2541	0.43205	1	0.407	0.298	0.286	0.3813	0.028
c2_cp_v5	KEGG_RNA_DEGRADATION	56	http://www.broadinstitute.org/gsea/msigdb/cards/KEGG_RNA_DEGRADATION	-0.35518	-1.2349	0.2603	0.43253	1	0.375	0.271	0.274	0.38695	0.022
c2_cp_v5	KEGG_CYSTEINE_AND_METHIONINE_METABOLISM	29	http://www.broadinstitute.org/gsea/msigdb/cards/KEGG_CYSTEINE_AND_METHIONINE_METABOLISM	-0.4088	-1.2364	0.2154	0.43341	1	0.586	0.328	0.395	0.38797	0.023
c2_cp_v5	REACTOME_MEIOTIC_RECOMBINATION	26	http://www.broadinstitute.org/gsea/msigdb/cards/REACTOME_MEIOTIC_RECOMBINATION	-0.38743	-1.23	0.2652	0.43407	1	0.346	0.18	0.284	0.38753	0.019
c2_cp_v5	REACTOME_METABOLISM_OF_PROTEINS	298	http://www.broadinstitute.org/gsea/msigdb/cards/REACTOME_METABOLISM_OF_PROTEINS	-0.33898	-1.2379	0.2265	0.43438	1	0.326	0.231	0.256	0.38637	0.024
c2_cp_v5	REACTOME_NUCLEAR_SIGNALING_BY_ERBB4	27	http://www.broadinstitute.org/gsea/msigdb/cards/REACTOME_NUCLEAR_SIGNALING_BY_ERBB4	-0.39139	-1.2384	0.1955	0.43698	1	0.481	0.307	0.334	0.38962	0.026
c2_cp_v5	REACTOME_TCA_CYCLE_AND_RESPIRATORY_ELECTRON_TRANSPORT	110	http://www.broadinstitute.org/gsea/msigdb/cards/REACTOME_TCA_CYCLE_AND_RESPIRATORY_ELECTRON_TRANSPORT	-0.49256	-1.24	0.3009	0.4381	1	0.627	0.311	0.436	0.39073	0.027
c2_cp_v5	REACTOME_MRNA_CAPPING	28	http://www.broadinstitute.org/gsea/msigdb/cards/REACTOME_MRNA_CAPPING	-0.43855	-1.2258	0.2954	0.43819	1	0.429	0.211	0.339	0.39002	0.019
c2_cp_v5	REACTOME_UNFOLDED_PROTEIN_RESPONSE	71	http://www.broadinstitute.org/gsea/msigdb/cards/REACTOME_UNFOLDED_PROTEIN_RESPONSE	-0.37071	-1.2446	0.2356	0.44068	1	0.423	0.29	0.302	0.38973	0.029
c2_cp_v5	KEGG_BASE_EXCISION_REPAIR	33	http://www.broadinstitute.org/gsea/msigdb/cards/KEGG_BASE_EXCISION_REPAIR	-0.37931	-1.2402	0.2396	0.4413	1	0.455	0.298	0.32	0.39131	0.029
c2_cp_v5	REACTOME_MITOTIC_PROMETAPHASE	80	http://www.broadinstitute.org/gsea/msigdb/cards/REACTOME_MITOTIC_PROMETAPHASE	-0.387	-1.2407	0.3121	0.44408	1	0.5	0.359	0.322	0.39312	0.03
c2_cp_v5	REACTOME_AUTODEGRADATION_OF_THE_E3_UBIQUITIN_LIGASE_COP1	45	http://www.broadinstitute.org/gsea/msigdb/cards/REACTOME_AUTODEGRADATION_OF_THE_E3_UBIQUITIN_LIGASE_COP1	-0.65104	-1.6851	0.02206	0.45574	0.694	0.556	0.21	0.44	0.16291	0.123
h_all_v5	HALLMARK_P53_PATHWAY	172	http://www.broadinstitute.org/gsea/msigdb/cards/HALLMARK_P53_PATHWAY	0.36098	1.5196	0.007194	0.46352	0.43	0.349	0.205	0.281	0	0.189
c2_cp_v5	PID_BARD1_PATHWAY	29	http://www.broadinstitute.org/gsea/msigdb/cards/PID_BARD1_PATHWAY	-0.38942	-1.2101	0.2816	0.46364	1	0.207	0.128	0.181	0.41722	0.024
c2_cp_v5	PID_INSULIN_PATHWAY	41	http://www.broadinstitute.org/gsea/msigdb/cards/PID_INSULIN_PATHWAY	0.49739	1.769	0.008351	0.46618	0.479	0.415	0.233	0.319	0	0.111
c2_cp_v5	REACTOME_DOWNSTREAM_TCR_SIGNALING	27	http://www.broadinstitute.org/gsea/msigdb/cards/REACTOME_DOWNSTREAM_TCR_SIGNALING	0.50853	1.7349	0.003976	0.47797	0.586	0.407	0.246	0.308	0.1664	0.115
c2_cp_v5	REACTOME_SIGNALING_BY_ROBO_RECEPTOR	26	http://www.broadinstitute.org/gsea/msigdb/cards/REACTOME_SIGNALING_BY_ROBO_RECEPTOR	0.52334	1.7197	0.006536	0.48108	0.626	0.423	0.169	0.352	0.16308	0.117
c2_cp_v5	KEGG_METABOLISM_OF_XENOBIOTICS_BY_CYTOCHROME_P450	26	http://www.broadinstitute.org/gsea/msigdb/cards/KEGG_METABOLISM_OF_XENOBIOTICS_BY_CYTOCHROME_P450	-0.41339	-1.198	0.2111	0.4827	1	0.231	0.0688	0.215	0.43976	0.028
c2_cp_v5	KEGG_UBIQUITIN_MEDIATED_PROTEOLYSIS	126	http://www.broadinstitute.org/gsea/msigdb/cards/KEGG_UBIQUITIN_MEDIATED_PROTEOLYSIS	-0.23258	-1.1934	0.2211	0.48744	1	0.175	0.142	0.151	0.4463	0.028
c2_cp_v5	REACTOME_DIABETES_PATHWAYS	110	http://www.broadinstitute.org/gsea/msigdb/cards/REACTOME_DIABETES_PATHWAYS	-0.31398	-1.1761	0.2694	0.5012	1	0.373	0.281	0.27	0.46225	0.023
c2_cp_v5	REACTOME_POST_TRANSLATIONAL_PROTEIN_MODIFICATION	139	http://www.broadinstitute.org/gsea/msigdb/cards/REACTOME_POST_TRANSLATIONAL_PROTEIN_MODIFICATION	-0.34318	-1.1841	0.2669	0.50136	1	0.331	0.231	0.257	0.46114	0.03
c2_cp_v5	REACTOME_APOPTOSIS	128	http://www.broadinstitute.org/gsea/msigdb/cards/REACTOME_APOPTOSIS	-0.26401	-1.1776	0.227	0.50205	1	0.211	0.155	0.18	0.46388	0.025
c2_cp_v5	PID_INTEGRIN3_PATHWAY	38	http://www.broadinstitute.org/gsea/msigdb/cards/PID_INTEGRIN3_PATHWAY	-0.44004	-1.1783	0.2681	0.50457	1	0.447	0.256	0.334	0.46641	0.028
c2_cp_v5	KEGG_SYSTEMIC_LUPUS_ERYTHEMATOSUS	41	http://www.broadinstitute.org/gsea/msigdb/cards/KEGG_SYSTEMIC_LUPUS_ERYTHEMATOSUS	-0.38382	-1.1788	0.2386	0.50749	1	0.415	0.186	0.339	0.469	0.03
c2_cp_v5	REACTOME_DAG_AND_IP3_SIGNALING	28	http://www.broadinstitute.org/gsea/msigdb/cards/REACTOME_DAG_AND_IP3_SIGNALING	-0.34384	-1.1706	0.2164	0.50808	1	0.25	0.148	0.213	0.47107	0.025
c2_cp_v5	REACTOME_SCF_BETA_TRCP_MEDIATED_DEGRADATION_OF_EMI1	46	http://www.broadinstitute.org/gsea/msigdb/cards/REACTOME_SCF_BETA_TRCP_MEDIATED_DEGRADATION_OF_EMI1	-0.69239	-1.6897	0.01287	0.5111	0.684	0.63	0.21	0.5	0.17391	0.132
h_all_v5	HALLMARK_MYC_TARGETS_V1	184	http://www.broadinstitute.org/gsea/msigdb/cards/HALLMARK_MYC_TARGETS_V1	-0.48279	-1.4895	0.1467	0.5165	0.547	0.5	0.301	0.354	0.35294	0.2
c2_cp_v5	PID_IL2_PI3K_PATHWAY	31	http://www.broadinstitute.org/gsea/msigdb/cards/PID_IL2_PI3K_PATHWAY	0.53072	1.6988	0.008016	0.51809	0.677	0.419	0.184	0.343	0.17778	0.131
c2_cp_v5	REACTOME_RNA_POL_III_TRANSCRIPTION	33	http://www.broadinstitute.org/gsea/msigdb/cards/REACTOME_RNA_POL_III_TRANSCRIPTION	-0.3411	-1.1605	0.2912	0.52407	1	0.394	0.223	0.307	0.49053	0.027
c2_cp_v5	KEGG_ALZHEIMERS_DISEASE	136	http://www.broadinstitute.org/gsea/msigdb/cards/KEGG_ALZHEIMERS_DISEASE	-0.36383	-1.1542	0.3575	0.53223	1	0.463	0.266	0.343	0.49889	0.029
c2_cp_v5	KEGG_BUTANOATE_METABOLISM	26	http://www.broadinstitute.org/gsea/msigdb/cards/KEGG_BUTANOATE_METABOLISM	-0.39753	-1.1496	0.3014	0.53735	1	0.462	0.277	0.334	0.5036	0.03
c2_cp_v5	REACTOME_PROTEIN_FOLDING	48	http://www.broadinstitute.org/gsea/msigdb/cards/REACTOME_PROTEIN_FOLDING	-0.31962	-1.1403	0.287	0.54402	1	0.333	0.222	0.26	0.5084	0.03
c2_cp_v5	PID_TCR_PATHWAY	62	http://www.broadinstitute.org/gsea/msigdb/cards/PID_TCR_PATHWAY	0.51819	1.7756	0.007968	0.54511	0.461	0.419	0.18	0.345	0	0.134
c2_cp_v5	KEGG_OOCYTE_MEIOSIS	92	http://www.broadinstitute.org/gsea/msigdb/cards/KEGG_OOCYTE_MEIOSIS	-0.28861	-1.1416	0.2873	0.54522	1	0.261	0.166	0.219	0.50942	0.031
c2_cp_v5	KEGG_INTESTINAL_IMMUNE_NETWORK_FOR_IGA_PRODUCTION	27	http://www.broadinstitute.org/gsea/msigdb/cards/KEGG_INTESTINAL_IMMUNE_NETWORK_FOR_IGA_PRODUCTION	-0.38804	-1.1372	0.2621	0.54598	1	0.296	0.186	0.242	0.51086	0.031
c2_cp_v5	REACTOME_TRANSCRIPTIONAL_REGULATION_OF_WHITE_ADIPOCYTE_DIFFERENTIATION	66	http://www.broadinstitute.org/gsea/msigdb/cards/REACTOME_TRANSCRIPTIONAL_REGULATION_OF_WHITE_ADIPOCYTE_DIFFERENTIATION	-0.27086	-1.1426	0.2448	0.54711	1	0.303	0.199	0.244	0.51032	0.033
c2_cp_v5	KEGG_PROPANOATE_METABOLISM	28	http://www.broadinstitute.org/gsea/msigdb/cards/KEGG_PROPANOATE_METABOLISM	-0.39079	-1.1288	0.3067	0.55061	1	0.536	0.292	0.38	0.51594	0.028
c2_cp_v5	REACTOME_RIG_I_MDA5_MEDIATED_INDUCTION_OF_IFN_ALPHA_BETA_PATHWAYS	58	http://www.broadinstitute.org/gsea/msigdb/cards/REACTOME_RIG_I_MDA5_MEDIATED_INDUCTION_OF_IFN_ALPHA_BETA_PATHWAYS	-0.29947	-1.1296	0.2821	0.55284	1	0.259	0.2	0.208	0.51756	0.03
c2_cp_v5	KEGG_PEROXISOME	65	http://www.broadinstitute.org/gsea/msigdb/cards/KEGG_PEROXISOME	-0.32063	-1.1314	0.3054	0.55332	1	0.415	0.254	0.311	0.51946	0.031
c2_cp_v5	PID_CD8_TCR_PATHWAY	50	http://www.broadinstitute.org/gsea/msigdb/cards/PID_CD8_TCR_PATHWAY	0.51092	1.7355	0.006316	0.55439	0.584	0.38	0.139	0.329	0.19321	0.137
c2_cp_v5	REACTOME_NOD1_2_SIGNALING_PATHWAY	28	http://www.broadinstitute.org/gsea/msigdb/cards/REACTOME_NOD1_2_SIGNALING_PATHWAY	0.39108	1.262	0.1929	0.55927	0.999	0.393	0.209	0.311	0.45809	0.123
c2_cp_v5	REACTOME_SIGNALING_BY_WNT	58	http://www.broadinstitute.org/gsea/msigdb/cards/REACTOME_SIGNALING_BY_WNT	-0.58379	-1.7224	0.03585	0.55992	0.595	0.466	0.21	0.369	0.18359	0.135
c2_cp_v5	ST_ERK1_ERK2_MAPK_PATHWAY	30	http://www.broadinstitute.org/gsea/msigdb/cards/ST_ERK1_ERK2_MAPK_PATHWAY	0.31992	1.2254	0.2112	0.56042	1	0.233	0.114	0.207	0.47269	0.117
c2_cp_v5	REACTOME_PI3K_EVENTS_IN_ERBB2_SIGNALING	38	http://www.broadinstitute.org/gsea/msigdb/cards/REACTOME_PI3K_EVENTS_IN_ERBB2_SIGNALING	0.3507	1.2237	0.234	0.56043	1	0.368	0.233	0.284	0.47607	0.117
c2_cp_v5	KEGG_GLIOMA	59	http://www.broadinstitute.org/gsea/msigdb/cards/KEGG_GLIOMA	0.34174	1.2216	0.25	0.56075	1	0.322	0.2	0.259	0.47806	0.115
c2_cp_v5	REACTOME_PLC_BETA_MEDIATED_EVENTS	36	http://www.broadinstitute.org/gsea/msigdb/cards/REACTOME_PLC_BETA_MEDIATED_EVENTS	-0.3049	-1.1115	0.285	0.56081	1	0.25	0.148	0.214	0.52777	0.025
c2_cp_v5	KEGG_EPITHELIAL_CELL_SIGNALING_IN_HELICOBACTER_PYLORI_INFECTION	61	http://www.broadinstitute.org/gsea/msigdb/cards/KEGG_EPITHELIAL_CELL_SIGNALING_IN_HELICOBACTER_PYLORI_INFECTION	0.34138	1.2631	0.1505	0.56131	0.999	0.328	0.184	0.269	0.46189	0.128
c2_cp_v5	PID_PI3K_PLC_TRK_PATHWAY	31	http://www.broadinstitute.org/gsea/msigdb/cards/PID_PI3K_PLC_TRK_PATHWAY	0.37447	1.2326	0.2156	0.56142	1	0.355	0.214	0.28	0.47226	0.12
c2_cp_v5	REACTOME_NFKB_AND_MAP_KINASES_ACTIVATION_MEDIATED_BY_TLR4_SIGNALING_REPERTOIRE	67	http://www.broadinstitute.org/gsea/msigdb/cards/REACTOME_NFKB_AND_MAP_KINASES_ACTIVATION_MEDIATED_BY_TLR4_SIGNALING_REPERTOIRE	0.29584	1.2364	0.1579	0.56155	1	0.328	0.209	0.261	0.46945	0.122
c2_cp_v5	REACTOME_GLUCONEOGENESIS	25	http://www.broadinstitute.org/gsea/msigdb/cards/REACTOME_GLUCONEOGENESIS	-0.36416	-1.1191	0.3283	0.56167	1	0.48	0.372	0.302	0.52794	0.03
c2_cp_v5	REACTOME_SIGNALING_BY_NOTCH1	60	http://www.broadinstitute.org/gsea/msigdb/cards/REACTOME_SIGNALING_BY_NOTCH1	0.30679	1.2342	0.1487	0.56206	1	0.283	0.151	0.242	0.47173	0.122
c2_cp_v5	REACTOME_CD28_CO_STIMULATION	30	http://www.broadinstitute.org/gsea/msigdb/cards/REACTOME_CD28_CO_STIMULATION	0.34985	1.238	0.1592	0.56249	1	0.4	0.249	0.301	0.47015	0.123
c2_cp_v5	REACTOME_GLUCAGON_SIGNALING_IN_METABOLIC_REGULATION	26	http://www.broadinstitute.org/gsea/msigdb/cards/REACTOME_GLUCAGON_SIGNALING_IN_METABOLIC_REGULATION	-0.34221	-1.1085	0.292	0.56281	1	0.346	0.246	0.262	0.53158	0.024
c2_cp_v5	PID_NETRIN_PATHWAY	28	http://www.broadinstitute.org/gsea/msigdb/cards/PID_NETRIN_PATHWAY	0.40868	1.2645	0.1917	0.5629	0.999	0.286	0.18	0.235	0.45884	0.131
c2_cp_v5	REACTOME_SIGNALLING_TO_ERKS	31	http://www.broadinstitute.org/gsea/msigdb/cards/REACTOME_SIGNALLING_TO_ERKS	0.35807	1.2262	0.2224	0.56293	1	0.194	0.106	0.173	0.47523	0.117
c2_cp_v5	KEGG_HUNTINGTONS_DISEASE	153	http://www.broadinstitute.org/gsea/msigdb/cards/KEGG_HUNTINGTONS_DISEASE	-0.35227	-1.1144	0.3829	0.56299	1	0.405	0.235	0.314	0.52918	0.028
c2_cp_v5	KEGG_MAPK_SIGNALING_PATHWAY	206	http://www.broadinstitute.org/gsea/msigdb/cards/KEGG_MAPK_SIGNALING_PATHWAY	0.28371	1.2581	0.1031	0.56341	0.999	0.325	0.217	0.259	0.46689	0.124
c2_cp_v5	REACTOME_APOPTOTIC_EXECUTION_PHASE	41	http://www.broadinstitute.org/gsea/msigdb/cards/REACTOME_APOPTOTIC_EXECUTION_PHASE	0.33695	1.2395	0.1867	0.56356	1	0.293	0.166	0.245	0.47298	0.122
c2_cp_v5	REACTOME_CLASS_B_2_SECRETIN_FAMILY_RECEPTORS	50	http://www.broadinstitute.org/gsea/msigdb/cards/REACTOME_CLASS_B_2_SECRETIN_FAMILY_RECEPTORS	-0.32247	-1.112	0.2985	0.56356	1	0.4	0.274	0.291	0.53099	0.026
c2_cp_v5	REACTOME_NOTCH1_INTRACELLULAR_DOMAIN_REGULATES_TRANSCRIPTION	40	http://www.broadinstitute.org/gsea/msigdb/cards/REACTOME_NOTCH1_INTRACELLULAR_DOMAIN_REGULATES_TRANSCRIPTION	0.33533	1.2663	0.1469	0.56375	0.999	0.4	0.228	0.31	0.46166	0.13
c2_cp_v5	REACTOME_PRE_NOTCH_EXPRESSION_AND_PROCESSING	36	http://www.broadinstitute.org/gsea/msigdb/cards/REACTOME_PRE_NOTCH_EXPRESSION_AND_PROCESSING	-0.32186	-1.1153	0.3186	0.56513	1	0.306	0.195	0.247	0.53142	0.029
c2_cp_v5	KEGG_PURINE_METABOLISM	125	http://www.broadinstitute.org/gsea/msigdb/cards/KEGG_PURINE_METABOLISM	-0.25979	-1.1193	0.2806	0.56518	1	0.288	0.216	0.228	0.53053	0.032
c2_cp_v5	KEGG_ENDOCYTOSIS	159	http://www.broadinstitute.org/gsea/msigdb/cards/KEGG_ENDOCYTOSIS	0.28335	1.2426	0.155	0.56534	1	0.352	0.244	0.269	0.46997	0.121
c2_cp_v5	PID_CDC42_PATHWAY	66	http://www.broadinstitute.org/gsea/msigdb/cards/PID_CDC42_PATHWAY	0.32536	1.2289	0.2095	0.5655	1	0.288	0.191	0.234	0.47506	0.119
c2_cp_v5	REACTOME_METABOLISM_OF_VITAMINS_AND_COFACTORS	43	http://www.broadinstitute.org/gsea/msigdb/cards/REACTOME_METABOLISM_OF_VITAMINS_AND_COFACTORS	-0.51201	-1.7494	0.005906	0.56555	0.504	0.372	0.165	0.312	0.19027	0.134
c2_cp_v5	PID_RAS_PATHWAY	28	http://www.broadinstitute.org/gsea/msigdb/cards/PID_RAS_PATHWAY	0.37743	1.2268	0.1729	0.56587	1	0.393	0.208	0.312	0.47874	0.118
c2_cp_v5	SIG_BCR_SIGNALING_PATHWAY	45	http://www.broadinstitute.org/gsea/msigdb/cards/SIG_BCR_SIGNALING_PATHWAY	0.4006	1.2482	0.2385	0.56675	1	0.222	0.104	0.2	0.47062	0.125
c2_cp_v5	KEGG_INSULIN_SIGNALING_PATHWAY	116	http://www.broadinstitute.org/gsea/msigdb/cards/KEGG_INSULIN_SIGNALING_PATHWAY	0.28763	1.24	0.1552	0.56677	1	0.319	0.233	0.247	0.47407	0.123
c2_cp_v5	PID_IL12_STAT4_PATHWAY	29	http://www.broadinstitute.org/gsea/msigdb/cards/PID_IL12_STAT4_PATHWAY	0.37808	1.244	0.1774	0.56687	1	0.31	0.19	0.252	0.4714	0.123
c2_cp_v5	BIOCARTA_IL1R_PATHWAY	25	http://www.broadinstitute.org/gsea/msigdb/cards/BIOCARTA_IL1R_PATHWAY	0.40032	1.2967	0.1656	0.56693	0.999	0.44	0.209	0.349	0.44455	0.135
c2_cp_v5	PID_NFAT_3PATHWAY	53	http://www.broadinstitute.org/gsea/msigdb/cards/PID_NFAT_3PATHWAY	0.30545	1.2542	0.1636	0.5677	0.999	0.264	0.188	0.215	0.46833	0.126
c2_cp_v5	ST_GA13_PATHWAY	33	http://www.broadinstitute.org/gsea/msigdb/cards/ST_GA13_PATHWAY	0.31995	1.2457	0.1656	0.56774	1	0.394	0.249	0.296	0.47055	0.125
c2_cp_v5	PID_THROMBIN_PAR1_PATHWAY	40	http://www.broadinstitute.org/gsea/msigdb/cards/PID_THROMBIN_PAR1_PATHWAY	0.38598	1.2684	0.1848	0.5684	0.999	0.375	0.164	0.314	0.46584	0.133
c2_cp_v5	REACTOME_PI_METABOLISM	42	http://www.broadinstitute.org/gsea/msigdb/cards/REACTOME_PI_METABOLISM	0.36933	1.2664	0.1914	0.56853	0.999	0.429	0.235	0.329	0.46579	0.131
c2_cp_v5	KEGG_FC_EPSILON_RI_SIGNALING_PATHWAY	62	http://www.broadinstitute.org/gsea/msigdb/cards/KEGG_FC_EPSILON_RI_SIGNALING_PATHWAY	0.34313	1.2161	0.2082	0.56933	1	0.387	0.197	0.312	0.48539	0.119
c2_cp_v5	PID_IL23_PATHWAY	28	http://www.broadinstitute.org/gsea/msigdb/cards/PID_IL23_PATHWAY	0.43443	1.2702	0.1808	0.56951	0.999	0.464	0.274	0.338	0.46327	0.133
c2_cp_v5	KEGG_AXON_GUIDANCE	90	http://www.broadinstitute.org/gsea/msigdb/cards/KEGG_AXON_GUIDANCE	0.32507	1.2974	0.08064	0.57091	0.999	0.356	0.226	0.277	0.44908	0.137
c2_cp_v5	KEGG_NATURAL_KILLER_CELL_MEDIATED_CYTOTOXICITY	103	http://www.broadinstitute.org/gsea/msigdb/cards/KEGG_NATURAL_KILLER_CELL_MEDIATED_CYTOTOXICITY	0.33533	1.3044	0.1284	0.57102	0.999	0.243	0.152	0.207	0.44524	0.14
c2_cp_v5	PID_KIT_PATHWAY	48	http://www.broadinstitute.org/gsea/msigdb/cards/PID_KIT_PATHWAY	0.39196	1.2484	0.2222	0.57121	1	0.542	0.297	0.382	0.47455	0.128
c2_cp_v5	KEGG_AMYOTROPHIC_LATERAL_SCLEROSIS_ALS	36	http://www.broadinstitute.org/gsea/msigdb/cards/KEGG_AMYOTROPHIC_LATERAL_SCLEROSIS_ALS	0.3686	1.4089	0.05157	0.57124	0.992	0.167	0.0466	0.159	0.38234	0.147
c2_cp_v5	KEGG_LEISHMANIA_INFECTION	49	http://www.broadinstitute.org/gsea/msigdb/cards/KEGG_LEISHMANIA_INFECTION	0.35296	1.2712	0.1684	0.57246	0.999	0.49	0.262	0.363	0.46729	0.136
c2_cp_v5	REACTOME_REGULATION_OF_INSULIN_SECRETION	60	http://www.broadinstitute.org/gsea/msigdb/cards/REACTOME_REGULATION_OF_INSULIN_SECRETION	-0.2747	-1.1008	0.2984	0.57349	1	0.333	0.249	0.251	0.54224	0.028
c2_cp_v5	PID_GMCSF_PATHWAY	35	http://www.broadinstitute.org/gsea/msigdb/cards/PID_GMCSF_PATHWAY	0.36444	1.2493	0.1866	0.57386	0.999	0.286	0.152	0.243	0.47822	0.129
c2_cp_v5	REACTOME_NUCLEAR_RECEPTOR_TRANSCRIPTION_PATHWAY	33	http://www.broadinstitute.org/gsea/msigdb/cards/REACTOME_NUCLEAR_RECEPTOR_TRANSCRIPTION_PATHWAY	0.37586	1.2081	0.1968	0.57407	1	0.303	0.127	0.265	0.49316	0.118
c2_cp_v5	PID_FAK_PATHWAY	57	http://www.broadinstitute.org/gsea/msigdb/cards/PID_FAK_PATHWAY	0.36369	1.2983	0.169	0.57449	0.999	0.246	0.111	0.219	0.4504	0.137
c2_cp_v5	SIG_INSULIN_RECEPTOR_PATHWAY_IN_CARDIAC_MYOCYTES	46	http://www.broadinstitute.org/gsea/msigdb/cards/SIG_INSULIN_RECEPTOR_PATHWAY_IN_CARDIAC_MYOCYTES	0.40126	1.3054	0.2073	0.57476	0.999	0.435	0.233	0.335	0.44744	0.141
c2_cp_v5	REACTOME_SIGNALING_BY_ILS	96	http://www.broadinstitute.org/gsea/msigdb/cards/REACTOME_SIGNALING_BY_ILS	0.31371	1.3354	0.09959	0.57497	0.999	0.281	0.185	0.231	0.42403	0.142
c2_cp_v5	PID_MYC_REPRESS_PATHWAY	57	http://www.broadinstitute.org/gsea/msigdb/cards/PID_MYC_REPRESS_PATHWAY	0.31054	1.2113	0.17	0.57517	1	0.263	0.137	0.228	0.49214	0.12
c2_cp_v5	KEGG_NEUROTROPHIN_SIGNALING_PATHWAY	112	http://www.broadinstitute.org/gsea/msigdb/cards/KEGG_NEUROTROPHIN_SIGNALING_PATHWAY	0.31966	1.2793	0.1691	0.57577	0.999	0.384	0.252	0.29	0.46183	0.136
c2_cp_v5	PID_NCADHERIN_PATHWAY	30	http://www.broadinstitute.org/gsea/msigdb/cards/PID_NCADHERIN_PATHWAY	0.38174	1.2715	0.1814	0.57719	0.999	0.367	0.169	0.306	0.47016	0.137
c2_cp_v5	PID_HIV_NEF_PATHWAY	34	http://www.broadinstitute.org/gsea/msigdb/cards/PID_HIV_NEF_PATHWAY	0.36226	1.2083	0.2262	0.57752	1	0.382	0.249	0.288	0.49614	0.12
c2_cp_v5	PID_FAS_PATHWAY	37	http://www.broadinstitute.org/gsea/msigdb/cards/PID_FAS_PATHWAY	0.39762	1.3372	0.1383	0.57755	0.999	0.324	0.161	0.273	0.4266	0.145
c2_cp_v5	REACTOME_MAPK_TARGETS_NUCLEAR_EVENTS_MEDIATED_BY_MAP_KINASES	30	http://www.broadinstitute.org/gsea/msigdb/cards/REACTOME_MAPK_TARGETS_NUCLEAR_EVENTS_MEDIATED_BY_MAP_KINASES	0.39086	1.2871	0.1631	0.57888	0.999	0.433	0.197	0.349	0.46394	0.137
c2_cp_v5	REACTOME_SYNTHESIS_OF_PIPS_AT_THE_PLASMA_MEMBRANE	27	http://www.broadinstitute.org/gsea/msigdb/cards/REACTOME_SYNTHESIS_OF_PIPS_AT_THE_PLASMA_MEMBRANE	0.4355	1.311	0.167	0.57901	0.999	0.407	0.18	0.335	0.44759	0.142
c2_cp_v5	BIOCARTA_FAS_PATHWAY	30	http://www.broadinstitute.org/gsea/msigdb/cards/BIOCARTA_FAS_PATHWAY	0.3825	1.4095	0.06598	0.57911	0.992	0.4	0.204	0.319	0.38852	0.149
c2_cp_v5	SIG_CD40PATHWAYMAP	33	http://www.broadinstitute.org/gsea/msigdb/cards/SIG_CD40PATHWAYMAP	0.36024	1.2802	0.1639	0.57923	0.999	0.394	0.239	0.3	0.46438	0.138
c2_cp_v5	PID_SHP2_PATHWAY	48	http://www.broadinstitute.org/gsea/msigdb/cards/PID_SHP2_PATHWAY	0.35904	1.3082	0.1354	0.57982	0.999	0.333	0.191	0.271	0.45265	0.143
c2_cp_v5	PID_BCR_5PATHWAY	65	http://www.broadinstitute.org/gsea/msigdb/cards/PID_BCR_5PATHWAY	0.35429	1.3057	0.1971	0.57999	0.999	0.308	0.209	0.244	0.45142	0.141
c2_cp_v5	PID_CXCR4_PATHWAY	95	http://www.broadinstitute.org/gsea/msigdb/cards/PID_CXCR4_PATHWAY	0.34295	1.2984	0.1086	0.58022	0.999	0.347	0.215	0.275	0.45509	0.142
c2_cp_v5	PID_E2F_PATHWAY	68	http://www.broadinstitute.org/gsea/msigdb/cards/PID_E2F_PATHWAY	0.39888	1.2887	0.2111	0.58043	0.999	0.544	0.323	0.37	0.46232	0.139
c2_cp_v5	PID_IL6_7_PATHWAY	46	http://www.broadinstitute.org/gsea/msigdb/cards/PID_IL6_7_PATHWAY	0.36364	1.2013	0.2063	0.58095	1	0.326	0.19	0.265	0.49941	0.12
c2_cp_v5	REACTOME_SIGNALING_BY_RHO_GTPASES	100	http://www.broadinstitute.org/gsea/msigdb/cards/REACTOME_SIGNALING_BY_RHO_GTPASES	0.32403	1.272	0.14	0.5814	0.999	0.24	0.153	0.205	0.47455	0.138
c2_cp_v5	BIOCARTA_KERATINOCYTE_PATHWAY	44	http://www.broadinstitute.org/gsea/msigdb/cards/BIOCARTA_KERATINOCYTE_PATHWAY	0.33981	1.3126	0.09651	0.58147	0.999	0.341	0.191	0.277	0.44938	0.142
c2_cp_v5	PID_ER_NONGENOMIC_PATHWAY	39	http://www.broadinstitute.org/gsea/msigdb/cards/PID_ER_NONGENOMIC_PATHWAY	0.40405	1.3275	0.1204	0.58159	0.999	0.41	0.188	0.334	0.44264	0.143
c2_cp_v5	BIOCARTA_TCR_PATHWAY	44	http://www.broadinstitute.org/gsea/msigdb/cards/BIOCARTA_TCR_PATHWAY	0.33665	1.3151	0.1037	0.58164	0.999	0.341	0.19	0.277	0.44685	0.144
c2_cp_v5	KEGG_RENAL_CELL_CARCINOMA	64	http://www.broadinstitute.org/gsea/msigdb/cards/KEGG_RENAL_CELL_CARCINOMA	0.32889	1.2742	0.183	0.58199	0.999	0.312	0.197	0.252	0.47257	0.137
c2_cp_v5	BIOCARTA_RACCYCD_PATHWAY	26	http://www.broadinstitute.org/gsea/msigdb/cards/BIOCARTA_RACCYCD_PATHWAY	0.43831	1.3882	0.1218	0.58248	0.996	0.231	0.102	0.208	0.40039	0.149
c2_cp_v5	PID_P53_DOWNSTREAM_PATHWAY	120	http://www.broadinstitute.org/gsea/msigdb/cards/PID_P53_DOWNSTREAM_PATHWAY	0.29318	1.2023	0.1755	0.58298	1	0.267	0.179	0.221	0.50096	0.121
c2_cp_v5	REACTOME_SIGNALING_BY_SCF_KIT	72	http://www.broadinstitute.org/gsea/msigdb/cards/REACTOME_SIGNALING_BY_SCF_KIT	0.3443	1.2808	0.141	0.5832	0.999	0.375	0.233	0.289	0.46889	0.141
c2_cp_v5	REACTOME_SIGNALING_BY_TGF_BETA_RECEPTOR_COMPLEX	59	http://www.broadinstitute.org/gsea/msigdb/cards/REACTOME_SIGNALING_BY_TGF_BETA_RECEPTOR_COMPLEX	0.32513	1.2831	0.1574	0.58348	0.999	0.373	0.26	0.277	0.46994	0.14
c2_cp_v5	PID_HEDGEHOG_GLI_PATHWAY	43	http://www.broadinstitute.org/gsea/msigdb/cards/PID_HEDGEHOG_GLI_PATHWAY	0.36909	1.3376	0.1332	0.58372	0.999	0.372	0.195	0.3	0.43122	0.147
c2_cp_v5	BIOCARTA_HIVNEF_PATHWAY	57	http://www.broadinstitute.org/gsea/msigdb/cards/BIOCARTA_HIVNEF_PATHWAY	0.36596	1.3908	0.09736	0.58381	0.995	0.386	0.252	0.29	0.40029	0.15
c2_cp_v5	PID_REG_GR_PATHWAY	67	http://www.broadinstitute.org/gsea/msigdb/cards/PID_REG_GR_PATHWAY	0.33738	1.3239	0.09438	0.58408	0.999	0.507	0.295	0.36	0.44257	0.144
c2_cp_v5	KEGG_ERBB_SIGNALING_PATHWAY	77	http://www.broadinstitute.org/gsea/msigdb/cards/KEGG_ERBB_SIGNALING_PATHWAY	0.35767	1.3292	0.1339	0.58425	0.999	0.364	0.2	0.293	0.43855	0.142
c2_cp_v5	KEGG_INOSITOL_PHOSPHATE_METABOLISM	45	http://www.broadinstitute.org/gsea/msigdb/cards/KEGG_INOSITOL_PHOSPHATE_METABOLISM	0.40113	1.3163	0.1452	0.5845	0.999	0.333	0.173	0.276	0.44557	0.145
c2_cp_v5	PID_RET_PATHWAY	35	http://www.broadinstitute.org/gsea/msigdb/cards/PID_RET_PATHWAY	0.3294	1.1886	0.2152	0.58459	1	0.371	0.219	0.291	0.50665	0.118
c2_cp_v5	REACTOME_NCAM_SIGNALING_FOR_NEURITE_OUT_GROWTH	48	http://www.broadinstitute.org/gsea/msigdb/cards/REACTOME_NCAM_SIGNALING_FOR_NEURITE_OUT_GROWTH	0.31766	1.1865	0.2052	0.58529	1	0.354	0.209	0.281	0.50866	0.118
c2_cp_v5	KEGG_PRION_DISEASES	27	http://www.broadinstitute.org/gsea/msigdb/cards/KEGG_PRION_DISEASES	0.39103	1.1845	0.2343	0.58594	1	0.593	0.31	0.41	0.50727	0.116
c2_cp_v5	REACTOME_MYD88_MAL_CASCADE_INITIATED_ON_PLASMA_MEMBRANE	77	http://www.broadinstitute.org/gsea/msigdb/cards/REACTOME_MYD88_MAL_CASCADE_INITIATED_ON_PLASMA_MEMBRANE	0.27781	1.1807	0.1919	0.5862	1	0.312	0.197	0.252	0.51384	0.114
c2_cp_v5	PID_PI3KCI_PATHWAY	48	http://www.broadinstitute.org/gsea/msigdb/cards/PID_PI3KCI_PATHWAY	0.33984	1.1969	0.2274	0.5864	1	0.292	0.18	0.24	0.5053	0.123
c2_cp_v5	REACTOME_ACTIVATION_OF_KAINATE_RECEPTORS_UPON_GLUTAMATE_BINDING	25	http://www.broadinstitute.org/gsea/msigdb/cards/REACTOME_ACTIVATION_OF_KAINATE_RECEPTORS_UPON_GLUTAMATE_BINDING	-0.35718	-1.0921	0.3385	0.5864	1	0.52	0.307	0.361	0.55942	0.033
c2_cp_v5	REACTOME_NUCLEOTIDE_BINDING_DOMAIN_LEUCINE_RICH_REPEAT_CONTAINING_RECEPTOR_NLR_SIGNALING_PATHWAYS	43	http://www.broadinstitute.org/gsea/msigdb/cards/REACTOME_NUCLEOTIDE_BINDING_DOMAIN_LEUCINE_RICH_REPEAT_CONTAINING_RECEPTOR_NLR_SIGNALING_PATHWAYS	0.32825	1.1895	0.2233	0.58656	1	0.256	0.115	0.227	0.50794	0.119
c2_cp_v5	PID_AR_NONGENOMIC_PATHWAY	29	http://www.broadinstitute.org/gsea/msigdb/cards/PID_AR_NONGENOMIC_PATHWAY	0.4343	1.3393	0.1501	0.58679	0.999	0.379	0.19	0.308	0.43005	0.148
c2_cp_v5	REACTOME_PI3K_EVENTS_IN_ERBB4_SIGNALING	32	http://www.broadinstitute.org/gsea/msigdb/cards/REACTOME_PI3K_EVENTS_IN_ERBB4_SIGNALING	0.34562	1.1948	0.2326	0.587	1	0.344	0.233	0.264	0.50497	0.121
c2_cp_v5	PID_TNF_PATHWAY	44	http://www.broadinstitute.org/gsea/msigdb/cards/PID_TNF_PATHWAY	0.33475	1.1822	0.2516	0.587	1	0.295	0.187	0.241	0.51076	0.115
c2_cp_v5	REACTOME_TRANSPORT_OF_MATURE_TRANSCRIPT_TO_CYTOPLASM	52	http://www.broadinstitute.org/gsea/msigdb/cards/REACTOME_TRANSPORT_OF_MATURE_TRANSCRIPT_TO_CYTOPLASM	-0.4353	-1.694	0.0515	0.58719	0.671	0.442	0.308	0.307	0.19519	0.148
c2_cp_v5	KEGG_ENDOMETRIAL_CANCER	50	http://www.broadinstitute.org/gsea/msigdb/cards/KEGG_ENDOMETRIAL_CANCER	0.33278	1.173	0.2686	0.58759	1	0.28	0.197	0.226	0.51397	0.108
c2_cp_v5	PID_TXA2PATHWAY	53	http://www.broadinstitute.org/gsea/msigdb/cards/PID_TXA2PATHWAY	0.35919	1.1782	0.249	0.58771	1	0.415	0.191	0.337	0.5135	0.115
c2_cp_v5	KEGG_ACUTE_MYELOID_LEUKEMIA	56	http://www.broadinstitute.org/gsea/msigdb/cards/KEGG_ACUTE_MYELOID_LEUKEMIA	0.41741	1.41	0.11	0.58807	0.992	0.5	0.297	0.353	0.39484	0.153
c2_cp_v5	KEGG_APOPTOSIS	77	http://www.broadinstitute.org/gsea/msigdb/cards/KEGG_APOPTOSIS	0.30436	1.1924	0.1963	0.58828	1	0.234	0.155	0.199	0.50804	0.121
c2_cp_v5	PID_RB_1PATHWAY	55	http://www.broadinstitute.org/gsea/msigdb/cards/PID_RB_1PATHWAY	0.40142	1.3797	0.1308	0.58919	0.998	0.4	0.199	0.322	0.41045	0.154
c2_cp_v5	PID_SMAD2_3NUCLEAR_PATHWAY	68	http://www.broadinstitute.org/gsea/msigdb/cards/PID_SMAD2_3NUCLEAR_PATHWAY	0.32429	1.1901	0.2678	0.58925	1	0.412	0.28	0.298	0.51141	0.119
c2_cp_v5	REACTOME_PIP3_ACTIVATES_AKT_SIGNALING	26	http://www.broadinstitute.org/gsea/msigdb/cards/REACTOME_PIP3_ACTIVATES_AKT_SIGNALING	0.3624	1.1739	0.2721	0.58926	1	0.346	0.233	0.266	0.5155	0.112
c2_cp_v5	REACTOME_TRIF_MEDIATED_TLR3_SIGNALING	69	http://www.broadinstitute.org/gsea/msigdb/cards/REACTOME_TRIF_MEDIATED_TLR3_SIGNALING	0.28079	1.1686	0.2652	0.58947	1	0.319	0.209	0.253	0.51878	0.109
c2_cp_v5	KEGG_ANTIGEN_PROCESSING_AND_PRESENTATION	45	http://www.broadinstitute.org/gsea/msigdb/cards/KEGG_ANTIGEN_PROCESSING_AND_PRESENTATION	-0.36875	-1.0883	0.3452	0.5901	1	0.4	0.3	0.281	0.56505	0.033
c2_cp_v5	PID_FCER1_PATHWAY	59	http://www.broadinstitute.org/gsea/msigdb/cards/PID_FCER1_PATHWAY	0.35261	1.3167	0.1471	0.59037	0.999	0.458	0.238	0.35	0.45069	0.148
c2_cp_v5	PID_FOXO_PATHWAY	46	http://www.broadinstitute.org/gsea/msigdb/cards/PID_FOXO_PATHWAY	0.31643	1.1751	0.2639	0.59048	1	0.196	0.0896	0.179	0.51609	0.116
c2_cp_v5	REACTOME_SIGNALING_BY_FGFR_MUTANTS	30	http://www.broadinstitute.org/gsea/msigdb/cards/REACTOME_SIGNALING_BY_FGFR_MUTANTS	0.43163	1.3916	0.08817	0.59091	0.995	0.433	0.208	0.344	0.40494	0.158
c2_cp_v5	PID_CMYB_PATHWAY	74	http://www.broadinstitute.org/gsea/msigdb/cards/PID_CMYB_PATHWAY	0.2891	1.1522	0.2477	0.5915	1	0.378	0.26	0.282	0.52337	0.097
c2_cp_v5	REACTOME_CELL_SURFACE_INTERACTIONS_AT_THE_VASCULAR_WALL	72	http://www.broadinstitute.org/gsea/msigdb/cards/REACTOME_CELL_SURFACE_INTERACTIONS_AT_THE_VASCULAR_WALL	0.31103	1.169	0.1904	0.59237	1	0.347	0.204	0.278	0.51995	0.111
c2_cp_v5	BIOCARTA_BIOPEPTIDES_PATHWAY	37	http://www.broadinstitute.org/gsea/msigdb/cards/BIOCARTA_BIOPEPTIDES_PATHWAY	0.36585	1.3184	0.1229	0.5926	0.999	0.378	0.221	0.296	0.45042	0.149
c2_cp_v5	PID_AR_PATHWAY	56	http://www.broadinstitute.org/gsea/msigdb/cards/PID_AR_PATHWAY	0.38778	1.3814	0.1214	0.59305	0.998	0.357	0.196	0.288	0.41152	0.155
c2_cp_v5	PID_MAPK_TRK_PATHWAY	32	http://www.broadinstitute.org/gsea/msigdb/cards/PID_MAPK_TRK_PATHWAY	0.42583	1.3398	0.1234	0.59316	0.999	0.406	0.221	0.317	0.43474	0.152
c2_cp_v5	REACTOME_GAB1_SIGNALOSOME	35	http://www.broadinstitute.org/gsea/msigdb/cards/REACTOME_GAB1_SIGNALOSOME	0.41989	1.4118	0.09362	0.59321	0.992	0.4	0.233	0.308	0.39871	0.154
c2_cp_v5	REACTOME_TRAF6_MEDIATED_INDUCTION_OF_NFKB_AND_MAP_KINASES_UPON_TLR7_8_OR_9_ACTIVATION	70	http://www.broadinstitute.org/gsea/msigdb/cards/REACTOME_TRAF6_MEDIATED_INDUCTION_OF_NFKB_AND_MAP_KINASES_UPON_TLR7_8_OR_9_ACTIVATION	0.3258	1.3424	0.1123	0.59418	0.999	0.343	0.209	0.273	0.43704	0.154
c2_cp_v5	REACTOME_NGF_SIGNALLING_VIA_TRKA_FROM_THE_PLASMA_MEMBRANE	121	http://www.broadinstitute.org/gsea/msigdb/cards/REACTOME_NGF_SIGNALLING_VIA_TRKA_FROM_THE_PLASMA_MEMBRANE	0.2628	1.1524	0.2682	0.59455	1	0.273	0.215	0.216	0.52566	0.103
c2_cp_v5	REACTOME_CELL_DEATH_SIGNALLING_VIA_NRAGE_NRIF_AND_NADE	50	http://www.broadinstitute.org/gsea/msigdb/cards/REACTOME_CELL_DEATH_SIGNALLING_VIA_NRAGE_NRIF_AND_NADE	0.38868	1.3622	0.1014	0.59489	0.999	0.34	0.209	0.27	0.42247	0.155
h_all_v5	HALLMARK_MYC_TARGETS_V2	57	http://www.broadinstitute.org/gsea/msigdb/cards/HALLMARK_MYC_TARGETS_V2	-0.50437	-1.4075	0.1742	0.59529	0.726	0.579	0.292	0.412	0.45714	0.225
c2_cp_v5	REACTOME_GPCR_DOWNSTREAM_SIGNALING	265	http://www.broadinstitute.org/gsea/msigdb/cards/REACTOME_GPCR_DOWNSTREAM_SIGNALING	0.27674	1.1642	0.1722	0.59541	1	0.328	0.239	0.255	0.52256	0.108
c2_cp_v5	PID_LYSOPHOSPHOLIPID_PATHWAY	57	http://www.broadinstitute.org/gsea/msigdb/cards/PID_LYSOPHOSPHOLIPID_PATHWAY	0.30656	1.1483	0.243	0.59635	1	0.368	0.2	0.296	0.53165	0.102
c2_cp_v5	BIOCARTA_MET_PATHWAY	37	http://www.broadinstitute.org/gsea/msigdb/cards/BIOCARTA_MET_PATHWAY	0.34653	1.1547	0.2929	0.59679	1	0.351	0.19	0.285	0.52783	0.107
c2_cp_v5	PID_P73PATHWAY	68	http://www.broadinstitute.org/gsea/msigdb/cards/PID_P73PATHWAY	0.28739	1.1528	0.2261	0.59745	1	0.25	0.189	0.204	0.52796	0.105
c2_cp_v5	REACTOME_MEMBRANE_TRAFFICKING	103	http://www.broadinstitute.org/gsea/msigdb/cards/REACTOME_MEMBRANE_TRAFFICKING	0.25787	1.1598	0.2542	0.59749	1	0.165	0.115	0.147	0.52804	0.109
c2_cp_v5	KEGG_FC_GAMMA_R_MEDIATED_PHAGOCYTOSIS	90	http://www.broadinstitute.org/gsea/msigdb/cards/KEGG_FC_GAMMA_R_MEDIATED_PHAGOCYTOSIS	0.33673	1.3642	0.1104	0.59767	0.998	0.267	0.14	0.231	0.42418	0.157
c2_cp_v5	SIG_PIP3_SIGNALING_IN_B_LYMPHOCYTES	32	http://www.broadinstitute.org/gsea/msigdb/cards/SIG_PIP3_SIGNALING_IN_B_LYMPHOCYTES	0.407	1.1459	0.3459	0.59776	1	0.281	0.0948	0.255	0.53469	0.101
c2_cp_v5	KEGG_SMALL_CELL_LUNG_CANCER	76	http://www.broadinstitute.org/gsea/msigdb/cards/KEGG_SMALL_CELL_LUNG_CANCER	0.31768	1.1559	0.2809	0.59792	1	0.5	0.335	0.335	0.52695	0.106
c2_cp_v5	BIOCARTA_IL2RB_PATHWAY	38	http://www.broadinstitute.org/gsea/msigdb/cards/BIOCARTA_IL2RB_PATHWAY	0.3796	1.3924	0.08686	0.59809	0.994	0.526	0.297	0.371	0.40974	0.161
c2_cp_v5	REACTOME_INTRINSIC_PATHWAY_FOR_APOPTOSIS	29	http://www.broadinstitute.org/gsea/msigdb/cards/REACTOME_INTRINSIC_PATHWAY_FOR_APOPTOSIS	0.36713	1.1577	0.2996	0.59812	1	0.138	0.0446	0.132	0.52594	0.107
c2_cp_v5	KEGG_CHRONIC_MYELOID_LEUKEMIA	69	http://www.broadinstitute.org/gsea/msigdb/cards/KEGG_CHRONIC_MYELOID_LEUKEMIA	0.39813	1.3435	0.1755	0.59873	0.999	0.522	0.328	0.352	0.43865	0.155
c2_cp_v5	PID_TRKR_PATHWAY	54	http://www.broadinstitute.org/gsea/msigdb/cards/PID_TRKR_PATHWAY	0.38447	1.3956	0.09914	0.59881	0.994	0.278	0.183	0.228	0.4113	0.16
c2_cp_v5	PID_IFNG_PATHWAY	38	http://www.broadinstitute.org/gsea/msigdb/cards/PID_IFNG_PATHWAY	0.43796	1.5135	0.04107	0.59903	0.964	0.5	0.296	0.353	0.35297	0.159
c2_cp_v5	KEGG_MTOR_SIGNALING_PATHWAY	46	http://www.broadinstitute.org/gsea/msigdb/cards/KEGG_MTOR_SIGNALING_PATHWAY	0.34104	1.1603	0.2895	0.60015	1	0.239	0.114	0.213	0.52938	0.112
c2_cp_v5	PID_PS1_PATHWAY	42	http://www.broadinstitute.org/gsea/msigdb/cards/PID_PS1_PATHWAY	0.39069	1.3693	0.1144	0.6007	0.998	0.476	0.26	0.354	0.42497	0.158
c2_cp_v5	PID_A6B1_A6B4_INTEGRIN_PATHWAY	40	http://www.broadinstitute.org/gsea/msigdb/cards/PID_A6B1_A6B4_INTEGRIN_PATHWAY	0.33881	1.1422	0.2766	0.60236	1	0.25	0.126	0.219	0.54205	0.104
c2_cp_v5	REACTOME_PI3K_AKT_ACTIVATION	33	http://www.broadinstitute.org/gsea/msigdb/cards/REACTOME_PI3K_AKT_ACTIVATION	0.4181	1.4123	0.1046	0.60268	0.992	0.394	0.233	0.303	0.40154	0.158
c2_cp_v5	ST_GRANULE_CELL_SURVIVAL_PATHWAY	26	http://www.broadinstitute.org/gsea/msigdb/cards/ST_GRANULE_CELL_SURVIVAL_PATHWAY	0.42646	1.4227	0.07745	0.60514	0.991	0.577	0.234	0.443	0.39702	0.157
c2_cp_v5	PID_IGF1_PATHWAY	29	http://www.broadinstitute.org/gsea/msigdb/cards/PID_IGF1_PATHWAY	0.42046	1.3441	0.1443	0.60531	0.999	0.552	0.297	0.389	0.44436	0.159
h_all_v5	HALLMARK_OXIDATIVE_PHOSPHORYLATION	185	http://www.broadinstitute.org/gsea/msigdb/cards/HALLMARK_OXIDATIVE_PHOSPHORYLATION	-0.49008	-1.3503	0.194	0.60552	0.82	0.589	0.302	0.417	0.51246	0.216
c2_cp_v5	REACTOME_MAP_KINASE_ACTIVATION_IN_TLR_CASCADE	47	http://www.broadinstitute.org/gsea/msigdb/cards/REACTOME_MAP_KINASE_ACTIVATION_IN_TLR_CASCADE	0.37569	1.3645	0.1159	0.60561	0.998	0.404	0.209	0.321	0.43042	0.157
c2_cp_v5	PID_ANGIOPOIETIN_RECEPTOR_PATHWAY	44	http://www.broadinstitute.org/gsea/msigdb/cards/PID_ANGIOPOIETIN_RECEPTOR_PATHWAY	0.40008	1.4145	0.07851	0.607	0.992	0.318	0.184	0.26	0.39904	0.16
c2_cp_v5	REACTOME_PHASE_II_CONJUGATION	38	http://www.broadinstitute.org/gsea/msigdb/cards/REACTOME_PHASE_II_CONJUGATION	0.37776	1.3491	0.05797	0.60723	0.999	0.289	0.13	0.253	0.44304	0.16
c2_cp_v5	REACTOME_SIGNALLING_BY_NGF	190	http://www.broadinstitute.org/gsea/msigdb/cards/REACTOME_SIGNALLING_BY_NGF	0.31054	1.4181	0.0543	0.60772	0.992	0.295	0.209	0.236	0.39937	0.157
c2_cp_v5	REACTOME_TRANSPORT_OF_INORGANIC_CATIONS_ANIONS_AND_AMINO_ACIDS_OLIGOPEPTIDES	55	http://www.broadinstitute.org/gsea/msigdb/cards/REACTOME_TRANSPORT_OF_INORGANIC_CATIONS_ANIONS_AND_AMINO_ACIDS_OLIGOPEPTIDES	0.41051	1.3461	0.1114	0.60781	0.999	0.327	0.137	0.284	0.44169	0.16
c2_cp_v5	KEGG_CHEMOKINE_SIGNALING_PATHWAY	163	http://www.broadinstitute.org/gsea/msigdb/cards/KEGG_CHEMOKINE_SIGNALING_PATHWAY	0.31463	1.3517	0.07035	0.60821	0.999	0.35	0.237	0.27	0.44216	0.158
c2_cp_v5	PID_P53_REGULATION_PATHWAY	54	http://www.broadinstitute.org/gsea/msigdb/cards/PID_P53_REGULATION_PATHWAY	0.39265	1.4413	0.08661	0.60867	0.991	0.333	0.193	0.27	0.39386	0.16
c2_cp_v5	REACTOME_TRANSCRIPTIONAL_ACTIVITY_OF_SMAD2_SMAD3_SMAD4_HETEROTRIMER	35	http://www.broadinstitute.org/gsea/msigdb/cards/REACTOME_TRANSCRIPTIONAL_ACTIVITY_OF_SMAD2_SMAD3_SMAD4_HETEROTRIMER	0.41809	1.4253	0.1145	0.60946	0.991	0.457	0.26	0.339	0.4008	0.161
c2_cp_v5	KEGG_PYRUVATE_METABOLISM	30	http://www.broadinstitute.org/gsea/msigdb/cards/KEGG_PYRUVATE_METABOLISM	-0.35953	-1.0764	0.3781	0.60947	1	0.467	0.304	0.325	0.58638	0.037
c2_cp_v5	PID_MET_PATHWAY	77	http://www.broadinstitute.org/gsea/msigdb/cards/PID_MET_PATHWAY	0.3415	1.3693	0.1035	0.60957	0.998	0.338	0.244	0.257	0.42963	0.159
c2_cp_v5	ST_B_CELL_ANTIGEN_RECEPTOR	38	http://www.broadinstitute.org/gsea/msigdb/cards/ST_B_CELL_ANTIGEN_RECEPTOR	0.40315	1.429	0.1089	0.6098	0.991	0.395	0.242	0.3	0.39951	0.16
c2_cp_v5	REACTOME_G_ALPHA1213_SIGNALLING_EVENTS	63	http://www.broadinstitute.org/gsea/msigdb/cards/REACTOME_G_ALPHA1213_SIGNALLING_EVENTS	0.41158	1.4485	0.06061	0.61184	0.99	0.333	0.152	0.284	0.39606	0.16
c2_cp_v5	BIOCARTA_G1_PATHWAY	26	http://www.broadinstitute.org/gsea/msigdb/cards/BIOCARTA_G1_PATHWAY	0.38901	1.1036	0.3669	0.61204	1	0.346	0.193	0.28	0.56295	0.082
c2_cp_v5	BIOCARTA_HDAC_PATHWAY	25	http://www.broadinstitute.org/gsea/msigdb/cards/BIOCARTA_HDAC_PATHWAY	0.37413	1.1019	0.3372	0.61228	1	0.32	0.147	0.274	0.56429	0.08
c2_cp_v5	PID_TGFBR_PATHWAY	52	http://www.broadinstitute.org/gsea/msigdb/cards/PID_TGFBR_PATHWAY	0.25895	1.1064	0.3211	0.61283	1	0.192	0.168	0.161	0.56479	0.085
c2_cp_v5	PID_ERBB4_PATHWAY	32	http://www.broadinstitute.org/gsea/msigdb/cards/PID_ERBB4_PATHWAY	0.30794	1.0983	0.2956	0.61347	1	0.25	0.18	0.205	0.56572	0.079
c2_cp_v5	PID_AJDISS_2PATHWAY	37	http://www.broadinstitute.org/gsea/msigdb/cards/PID_AJDISS_2PATHWAY	0.29473	1.0997	0.295	0.61366	1	0.297	0.205	0.237	0.56603	0.08
c2_cp_v5	KEGG_TOLL_LIKE_RECEPTOR_SIGNALING_PATHWAY	82	http://www.broadinstitute.org/gsea/msigdb/cards/KEGG_TOLL_LIKE_RECEPTOR_SIGNALING_PATHWAY	0.28157	1.1076	0.3135	0.61399	1	0.378	0.246	0.287	0.56431	0.087
c2_cp_v5	PID_ARF6_PATHWAY	29	http://www.broadinstitute.org/gsea/msigdb/cards/PID_ARF6_PATHWAY	0.35574	1.1203	0.3117	0.61421	1	0.448	0.26	0.333	0.56357	0.098
c2_cp_v5	REACTOME_RESPONSE_TO_ELEVATED_PLATELET_CYTOSOLIC_CA2_	72	http://www.broadinstitute.org/gsea/msigdb/cards/REACTOME_RESPONSE_TO_ELEVATED_PLATELET_CYTOSOLIC_CA2_	-0.34868	-1.072	0.392	0.61436	1	0.389	0.247	0.294	0.59074	0.037
c2_cp_v5	ST_JNK_MAPK_PATHWAY	37	http://www.broadinstitute.org/gsea/msigdb/cards/ST_JNK_MAPK_PATHWAY	0.33456	1.1039	0.3576	0.61455	1	0.378	0.246	0.286	0.56577	0.084
c2_cp_v5	PID_ECADHERIN_NASCENT_AJ_PATHWAY	39	http://www.broadinstitute.org/gsea/msigdb/cards/PID_ECADHERIN_NASCENT_AJ_PATHWAY	0.29205	1.1217	0.305	0.61469	1	0.256	0.191	0.208	0.56385	0.1
c2_cp_v5	KEGG_ABC_TRANSPORTERS	29	http://www.broadinstitute.org/gsea/msigdb/cards/KEGG_ABC_TRANSPORTERS	0.36701	1.1082	0.326	0.61597	1	0.552	0.315	0.379	0.56715	0.09
c2_cp_v5	PID_TCPTP_PATHWAY	42	http://www.broadinstitute.org/gsea/msigdb/cards/PID_TCPTP_PATHWAY	0.29056	1.0834	0.3264	0.6164	1	0.238	0.111	0.212	0.57008	0.069
c2_cp_v5	REACTOME_NEURONAL_SYSTEM	150	http://www.broadinstitute.org/gsea/msigdb/cards/REACTOME_NEURONAL_SYSTEM	0.25715	1.1224	0.211	0.61655	1	0.26	0.16	0.221	0.56516	0.101
c2_cp_v5	BIOCARTA_PDGF_PATHWAY	32	http://www.broadinstitute.org/gsea/msigdb/cards/BIOCARTA_PDGF_PATHWAY	0.41029	1.3518	0.149	0.6166	0.999	0.406	0.19	0.33	0.44839	0.165
c2_cp_v5	REACTOME_TRANSMISSION_ACROSS_CHEMICAL_SYNAPSES	107	http://www.broadinstitute.org/gsea/msigdb/cards/REACTOME_TRANSMISSION_ACROSS_CHEMICAL_SYNAPSES	0.24505	1.0847	0.2743	0.61722	1	0.271	0.16	0.23	0.57217	0.072
c2_cp_v5	REACTOME_SIGNALING_BY_INSULIN_RECEPTOR	81	http://www.broadinstitute.org/gsea/msigdb/cards/REACTOME_SIGNALING_BY_INSULIN_RECEPTOR	0.32955	1.4346	0.06161	0.61739	0.991	0.346	0.23	0.268	0.40079	0.16
c2_cp_v5	PID_REELIN_PATHWAY	25	http://www.broadinstitute.org/gsea/msigdb/cards/PID_REELIN_PATHWAY	0.48671	1.5194	0.02908	0.61785	0.959	0.56	0.295	0.396	0.35687	0.17
c2_cp_v5	REACTOME_ASPARAGINE_N_LINKED_GLYCOSYLATION	75	http://www.broadinstitute.org/gsea/msigdb/cards/REACTOME_ASPARAGINE_N_LINKED_GLYCOSYLATION	-0.33812	-1.068	0.3942	0.61818	1	0.453	0.34	0.301	0.59368	0.037
c2_cp_v5	PID_INTEGRIN_A4B1_PATHWAY	32	http://www.broadinstitute.org/gsea/msigdb/cards/PID_INTEGRIN_A4B1_PATHWAY	0.34043	1.1231	0.2956	0.61861	1	0.25	0.169	0.208	0.56674	0.103
c2_cp_v5	PID_AVB3_OPN_PATHWAY	30	http://www.broadinstitute.org/gsea/msigdb/cards/PID_AVB3_OPN_PATHWAY	0.31665	1.0793	0.3553	0.61864	1	0.367	0.19	0.298	0.57369	0.067
c2_cp_v5	KEGG_PHOSPHATIDYLINOSITOL_SIGNALING_SYSTEM	65	http://www.broadinstitute.org/gsea/msigdb/cards/KEGG_PHOSPHATIDYLINOSITOL_SIGNALING_SYSTEM	0.41984	1.5135	0.02306	0.61893	0.964	0.292	0.114	0.26	0.36473	0.166
c2_cp_v5	ST_FAS_SIGNALING_PATHWAY	61	http://www.broadinstitute.org/gsea/msigdb/cards/ST_FAS_SIGNALING_PATHWAY	0.24879	1.1246	0.2425	0.61893	1	0.23	0.178	0.19	0.56501	0.103
c2_cp_v5	PID_CD8_TCR_DOWNSTREAM_PATHWAY	50	http://www.broadinstitute.org/gsea/msigdb/cards/PID_CD8_TCR_DOWNSTREAM_PATHWAY	0.29485	1.1132	0.3038	0.61912	1	0.26	0.149	0.222	0.56945	0.098
c2_cp_v5	REACTOME_SIGNALING_BY_GPCR	342	http://www.broadinstitute.org/gsea/msigdb/cards/REACTOME_SIGNALING_BY_GPCR	0.24539	1.1082	0.2182	0.61923	1	0.313	0.245	0.243	0.56975	0.093
c2_cp_v5	REACTOME_CYTOKINE_SIGNALING_IN_IMMUNE_SYSTEM	221	http://www.broadinstitute.org/gsea/msigdb/cards/REACTOME_CYTOKINE_SIGNALING_IN_IMMUNE_SYSTEM	0.23113	1.0772	0.331	0.61953	1	0.29	0.218	0.23	0.57656	0.068
c2_cp_v5	PID_P38_ALPHA_BETA_PATHWAY	29	http://www.broadinstitute.org/gsea/msigdb/cards/PID_P38_ALPHA_BETA_PATHWAY	0.34194	1.1308	0.3018	0.61984	1	0.448	0.249	0.337	0.56344	0.107
c2_cp_v5	PID_WNT_NONCANONICAL_PATHWAY	30	http://www.broadinstitute.org/gsea/msigdb/cards/PID_WNT_NONCANONICAL_PATHWAY	0.32207	1.0755	0.3504	0.61987	1	0.333	0.175	0.276	0.57577	0.067
c2_cp_v5	REACTOME_AXON_GUIDANCE	185	http://www.broadinstitute.org/gsea/msigdb/cards/REACTOME_AXON_GUIDANCE	0.25528	1.0848	0.2927	0.62014	1	0.308	0.215	0.245	0.57502	0.074
c2_cp_v5	ST_WNT_BETA_CATENIN_PATHWAY	26	http://www.broadinstitute.org/gsea/msigdb/cards/ST_WNT_BETA_CATENIN_PATHWAY	0.35799	1.1092	0.3417	0.6206	1	0.5	0.306	0.348	0.5719	0.096
c2_cp_v5	KEGG_NON_SMALL_CELL_LUNG_CANCER	51	http://www.broadinstitute.org/gsea/msigdb/cards/KEGG_NON_SMALL_CELL_LUNG_CANCER	0.31703	1.0797	0.3634	0.62078	1	0.294	0.197	0.237	0.57604	0.069
c2_cp_v5	REACTOME_SIGNALING_BY_EGFR_IN_CANCER	99	http://www.broadinstitute.org/gsea/msigdb/cards/REACTOME_SIGNALING_BY_EGFR_IN_CANCER	0.252	1.0917	0.326	0.62099	1	0.253	0.208	0.202	0.57468	0.076
c2_cp_v5	ST_PHOSPHOINOSITIDE_3_KINASE_PATHWAY	36	http://www.broadinstitute.org/gsea/msigdb/cards/ST_PHOSPHOINOSITIDE_3_KINASE_PATHWAY	0.31896	1.0735	0.3625	0.62128	1	0.389	0.214	0.307	0.57889	0.066
c2_cp_v5	REACTOME_APOPTOTIC_CLEAVAGE_OF_CELLULAR_PROTEINS	33	http://www.broadinstitute.org/gsea/msigdb/cards/REACTOME_APOPTOTIC_CLEAVAGE_OF_CELLULAR_PROTEINS	0.32956	1.1252	0.2959	0.6213	1	0.273	0.166	0.228	0.56756	0.105
c2_cp_v5	PID_CASPASE_PATHWAY	51	http://www.broadinstitute.org/gsea/msigdb/cards/PID_CASPASE_PATHWAY	0.29605	1.0886	0.297	0.62131	1	0.353	0.249	0.266	0.57543	0.076
c2_cp_v5	REACTOME_PI_3K_CASCADE	38	http://www.broadinstitute.org/gsea/msigdb/cards/REACTOME_PI_3K_CASCADE	0.31273	1.1106	0.3226	0.62134	1	0.342	0.208	0.272	0.5699	0.097
c2_cp_v5	PID_CDC42_REG_PATHWAY	28	http://www.broadinstitute.org/gsea/msigdb/cards/PID_CDC42_REG_PATHWAY	0.45327	1.4414	0.07128	0.62166	0.991	0.357	0.143	0.307	0.40261	0.162
c2_cp_v5	SIG_CHEMOTAXIS	40	http://www.broadinstitute.org/gsea/msigdb/cards/SIG_CHEMOTAXIS	0.46398	1.4586	0.08566	0.62172	0.989	0.45	0.233	0.346	0.39715	0.164
c2_cp_v5	PID_ERBB1_DOWNSTREAM_PATHWAY	102	http://www.broadinstitute.org/gsea/msigdb/cards/PID_ERBB1_DOWNSTREAM_PATHWAY	0.24685	1.0869	0.3106	0.62192	1	0.294	0.217	0.232	0.57688	0.076
c2_cp_v5	PID_HDAC_CLASSI_PATHWAY	62	http://www.broadinstitute.org/gsea/msigdb/cards/PID_HDAC_CLASSI_PATHWAY	0.23424	1.1134	0.2696	0.62208	1	0.177	0.141	0.153	0.57183	0.101
c2_cp_v5	REACTOME_THE_ROLE_OF_NEF_IN_HIV1_REPLICATION_AND_DISEASE_PATHOGENESIS	26	http://www.broadinstitute.org/gsea/msigdb/cards/REACTOME_THE_ROLE_OF_NEF_IN_HIV1_REPLICATION_AND_DISEASE_PATHOGENESIS	0.32316	1.1281	0.3084	0.62209	1	0.269	0.193	0.218	0.565	0.107
c2_cp_v5	BIOCARTA_EGF_PATHWAY	31	http://www.broadinstitute.org/gsea/msigdb/cards/BIOCARTA_EGF_PATHWAY	0.4309	1.4291	0.09274	0.62216	0.991	0.452	0.191	0.366	0.40754	0.163
c2_cp_v5	KEGG_PROSTATE_CANCER	84	http://www.broadinstitute.org/gsea/msigdb/cards/KEGG_PROSTATE_CANCER	0.27275	1.0852	0.3363	0.6222	1	0.286	0.217	0.225	0.57708	0.075
c2_cp_v5	PID_TRAIL_PATHWAY	28	http://www.broadinstitute.org/gsea/msigdb/cards/PID_TRAIL_PATHWAY	0.33405	1.1313	0.2911	0.62231	1	0.25	0.149	0.213	0.56602	0.109
c2_cp_v5	PID_ERBB1_RECEPTOR_PROXIMAL_PATHWAY	34	http://www.broadinstitute.org/gsea/msigdb/cards/PID_ERBB1_RECEPTOR_PROXIMAL_PATHWAY	0.44532	1.4675	0.06571	0.62246	0.987	0.353	0.191	0.286	0.39466	0.162
c2_cp_v5	KEGG_GNRH_SIGNALING_PATHWAY	75	http://www.broadinstitute.org/gsea/msigdb/cards/KEGG_GNRH_SIGNALING_PATHWAY	0.26217	1.0925	0.2797	0.62259	1	0.28	0.164	0.235	0.57683	0.082
c2_cp_v5	REACTOME_IL_2_SIGNALING	36	http://www.broadinstitute.org/gsea/msigdb/cards/REACTOME_IL_2_SIGNALING	0.29955	1.0893	0.3498	0.62294	1	0.25	0.14	0.216	0.57778	0.078
c2_cp_v5	KEGG_B_CELL_RECEPTOR_SIGNALING_PATHWAY	73	http://www.broadinstitute.org/gsea/msigdb/cards/KEGG_B_CELL_RECEPTOR_SIGNALING_PATHWAY	0.29992	1.1255	0.3387	0.62402	1	0.274	0.197	0.221	0.56932	0.108
c2_cp_v5	PID_P75_NTR_PATHWAY	60	http://www.broadinstitute.org/gsea/msigdb/cards/PID_P75_NTR_PATHWAY	0.35814	1.449	0.03279	0.62463	0.99	0.2	0.102	0.181	0.40527	0.167
c2_cp_v5	PID_CXCR3_PATHWAY	40	http://www.broadinstitute.org/gsea/msigdb/cards/PID_CXCR3_PATHWAY	0.3333	1.1139	0.342	0.62463	1	0.55	0.359	0.353	0.57415	0.103
c2_cp_v5	REACTOME_GPVI_MEDIATED_ACTIVATION_CASCADE	31	http://www.broadinstitute.org/gsea/msigdb/cards/REACTOME_GPVI_MEDIATED_ACTIVATION_CASCADE	0.49792	1.5232	0.0661	0.62466	0.958	0.516	0.238	0.394	0.36168	0.17
c2_cp_v5	PID_ERBB2_ERBB3_PATHWAY	42	http://www.broadinstitute.org/gsea/msigdb/cards/PID_ERBB2_ERBB3_PATHWAY	0.31654	1.0686	0.3716	0.62528	1	0.238	0.152	0.203	0.58688	0.066
c2_cp_v5	REACTOME_ANTIGEN_ACTIVATES_B_CELL_RECEPTOR_LEADING_TO_GENERATION_OF_SECOND_MESSENGERS	29	http://www.broadinstitute.org/gsea/msigdb/cards/REACTOME_ANTIGEN_ACTIVATES_B_CELL_RECEPTOR_LEADING_TO_GENERATION_OF_SECOND_MESSENGERS	0.32495	1.0699	0.3879	0.62585	1	0.138	0.0484	0.132	0.58554	0.067
c2_cp_v5	PID_IL12_2PATHWAY	54	http://www.broadinstitute.org/gsea/msigdb/cards/PID_IL12_2PATHWAY	0.46333	1.4707	0.06904	0.62755	0.986	0.37	0.202	0.297	0.38791	0.161
c2_cp_v5	PID_AVB3_INTEGRIN_PATHWAY	63	http://www.broadinstitute.org/gsea/msigdb/cards/PID_AVB3_INTEGRIN_PATHWAY	-0.32973	-1.0532	0.3906	0.63075	1	0.333	0.222	0.261	0.60842	0.036
c2_cp_v5	KEGG_AMINO_SUGAR_AND_NUCLEOTIDE_SUGAR_METABOLISM	41	http://www.broadinstitute.org/gsea/msigdb/cards/KEGG_AMINO_SUGAR_AND_NUCLEOTIDE_SUGAR_METABOLISM	-0.32048	-1.0547	0.3874	0.63203	1	0.171	0.0893	0.156	0.60598	0.038
c2_cp_v5	KEGG_LONG_TERM_POTENTIATION	51	http://www.broadinstitute.org/gsea/msigdb/cards/KEGG_LONG_TERM_POTENTIATION	0.36247	1.46	0.03064	0.63216	0.989	0.353	0.164	0.296	0.40404	0.169
c2_cp_v5	REACTOME_IL1_SIGNALING	35	http://www.broadinstitute.org/gsea/msigdb/cards/REACTOME_IL1_SIGNALING	0.44004	1.4994	0.04308	0.63239	0.975	0.371	0.185	0.304	0.37648	0.175
c2_cp_v5	ST_P38_MAPK_PATHWAY	36	http://www.broadinstitute.org/gsea/msigdb/cards/ST_P38_MAPK_PATHWAY	0.38409	1.4505	0.07347	0.63409	0.99	0.389	0.217	0.305	0.41033	0.169
c2_cp_v5	PID_SYNDECAN_4_PATHWAY	28	http://www.broadinstitute.org/gsea/msigdb/cards/PID_SYNDECAN_4_PATHWAY	-0.32561	-1.0551	0.3796	0.63516	1	0.179	0.0976	0.161	0.60939	0.04
c2_cp_v5	PID_IL1_PATHWAY	32	http://www.broadinstitute.org/gsea/msigdb/cards/PID_IL1_PATHWAY	0.46292	1.4931	0.06992	0.63583	0.977	0.469	0.209	0.371	0.38478	0.172
c2_cp_v5	PID_ERBB1_INTERNALIZATION_PATHWAY	38	http://www.broadinstitute.org/gsea/msigdb/cards/PID_ERBB1_INTERNALIZATION_PATHWAY	0.31418	1.0619	0.3928	0.63631	1	0.184	0.104	0.165	0.59927	0.073
c2_cp_v5	KEGG_HOMOLOGOUS_RECOMBINATION	28	http://www.broadinstitute.org/gsea/msigdb/cards/KEGG_HOMOLOGOUS_RECOMBINATION	-0.32394	-1.0563	0.3838	0.63692	1	0.321	0.229	0.248	0.61243	0.041
c2_cp_v5	PID_HES_HEY_PATHWAY	39	http://www.broadinstitute.org/gsea/msigdb/cards/PID_HES_HEY_PATHWAY	0.46616	1.487	0.04301	0.63816	0.98	0.487	0.222	0.38	0.3897	0.174
c2_cp_v5	KEGG_PROGESTERONE_MEDIATED_OOCYTE_MATURATION	73	http://www.broadinstitute.org/gsea/msigdb/cards/KEGG_PROGESTERONE_MEDIATED_OOCYTE_MATURATION	-0.25706	-1.0475	0.3545	0.63824	1	0.384	0.283	0.277	0.61559	0.037
c2_cp_v5	KEGG_REGULATION_OF_ACTIN_CYTOSKELETON	173	http://www.broadinstitute.org/gsea/msigdb/cards/KEGG_REGULATION_OF_ACTIN_CYTOSKELETON	0.36137	1.5255	0.004141	0.63854	0.955	0.318	0.192	0.26	0.36726	0.177
c2_cp_v5	BIOCARTA_PPARA_PATHWAY	51	http://www.broadinstitute.org/gsea/msigdb/cards/BIOCARTA_PPARA_PATHWAY	0.26446	1.0588	0.362	0.6396	1	0.275	0.14	0.237	0.60549	0.071
c2_cp_v5	BIOCARTA_MAPK_PATHWAY	82	http://www.broadinstitute.org/gsea/msigdb/cards/BIOCARTA_MAPK_PATHWAY	0.37875	1.471	0.0501	0.64349	0.986	0.366	0.197	0.296	0.39839	0.172
c2_cp_v5	SIG_PIP3_SIGNALING_IN_CARDIAC_MYOCTES	61	http://www.broadinstitute.org/gsea/msigdb/cards/SIG_PIP3_SIGNALING_IN_CARDIAC_MYOCTES	0.42361	1.5303	0.02407	0.64381	0.953	0.443	0.233	0.341	0.37054	0.181
c2_cp_v5	PID_PDGFRB_PATHWAY	128	http://www.broadinstitute.org/gsea/msigdb/cards/PID_PDGFRB_PATHWAY	0.24675	1.0503	0.3938	0.64468	1	0.312	0.233	0.242	0.61017	0.066
c2_cp_v5	REACTOME_CHEMOKINE_RECEPTORS_BIND_CHEMOKINES	43	http://www.broadinstitute.org/gsea/msigdb/cards/REACTOME_CHEMOKINE_RECEPTORS_BIND_CHEMOKINES	0.35618	1.0468	0.3828	0.64618	1	0.442	0.274	0.322	0.61579	0.065
c2_cp_v5	KEGG_PANCREATIC_CANCER	65	http://www.broadinstitute.org/gsea/msigdb/cards/KEGG_PANCREATIC_CANCER	0.28917	1.0479	0.3959	0.64666	1	0.277	0.208	0.22	0.61169	0.066
c2_cp_v5	PID_CERAMIDE_PATHWAY	48	http://www.broadinstitute.org/gsea/msigdb/cards/PID_CERAMIDE_PATHWAY	0.25887	1.0536	0.3934	0.6471	1	0.396	0.296	0.28	0.61272	0.074
c2_cp_v5	KEGG_GAP_JUNCTION	68	http://www.broadinstitute.org/gsea/msigdb/cards/KEGG_GAP_JUNCTION	0.26403	1.0505	0.3678	0.64728	1	0.279	0.2	0.225	0.61237	0.07
c2_cp_v5	REACTOME_ACTIVATED_TLR4_SIGNALLING	87	http://www.broadinstitute.org/gsea/msigdb/cards/REACTOME_ACTIVATED_TLR4_SIGNALLING	0.24939	1.0513	0.3525	0.64876	1	0.287	0.197	0.232	0.61458	0.073
c2_cp_v5	KEGG_LEUKOCYTE_TRANSENDOTHELIAL_MIGRATION	92	http://www.broadinstitute.org/gsea/msigdb/cards/KEGG_LEUKOCYTE_TRANSENDOTHELIAL_MIGRATION	0.27854	1.043	0.3787	0.65079	1	0.348	0.225	0.271	0.62082	0.067
c2_cp_v5	REACTOME_TRANS_GOLGI_NETWORK_VESICLE_BUDDING	54	http://www.broadinstitute.org/gsea/msigdb/cards/REACTOME_TRANS_GOLGI_NETWORK_VESICLE_BUDDING	0.37516	1.5342	0.02817	0.65319	0.952	0.222	0.115	0.197	0.36728	0.184
c2_cp_v5	KEGG_T_CELL_RECEPTOR_SIGNALING_PATHWAY	99	http://www.broadinstitute.org/gsea/msigdb/cards/KEGG_T_CELL_RECEPTOR_SIGNALING_PATHWAY	0.39948	1.5468	0.02658	0.65339	0.942	0.424	0.239	0.325	0.35593	0.178
c2_cp_v5	PID_RETINOIC_ACID_PATHWAY	28	http://www.broadinstitute.org/gsea/msigdb/cards/PID_RETINOIC_ACID_PATHWAY	0.30736	1.0401	0.3775	0.65393	1	0.286	0.131	0.249	0.62252	0.067
c2_cp_v5	REACTOME_P75_NTR_RECEPTOR_MEDIATED_SIGNALLING	69	http://www.broadinstitute.org/gsea/msigdb/cards/REACTOME_P75_NTR_RECEPTOR_MEDIATED_SIGNALLING	0.36875	1.4731	0.05322	0.65397	0.985	0.319	0.194	0.258	0.40616	0.178
c2_cp_v5	KEGG_NOTCH_SIGNALING_PATHWAY	42	http://www.broadinstitute.org/gsea/msigdb/cards/KEGG_NOTCH_SIGNALING_PATHWAY	0.28946	1.0349	0.4157	0.66159	1	0.381	0.226	0.296	0.62963	0.071
c2_cp_v5	PID_ENDOTHELIN_PATHWAY	55	http://www.broadinstitute.org/gsea/msigdb/cards/PID_ENDOTHELIN_PATHWAY	0.26031	1.033	0.3968	0.66242	1	0.309	0.2	0.248	0.63086	0.071
c2_cp_v5	PID_ERA_GENOMIC_PATHWAY	56	http://www.broadinstitute.org/gsea/msigdb/cards/PID_ERA_GENOMIC_PATHWAY	0.35787	1.4743	0.03597	0.66778	0.984	0.339	0.199	0.273	0.41646	0.186
c2_cp_v5	REACTOME_GOLGI_ASSOCIATED_VESICLE_BIOGENESIS	47	http://www.broadinstitute.org/gsea/msigdb/cards/REACTOME_GOLGI_ASSOCIATED_VESICLE_BIOGENESIS	0.37645	1.5492	0.01946	0.6715	0.94	0.255	0.142	0.22	0.35792	0.189
c2_cp_v5	KEGG_BLADDER_CANCER	38	http://www.broadinstitute.org/gsea/msigdb/cards/KEGG_BLADDER_CANCER	0.2965	1.0248	0.4068	0.67276	1	0.289	0.193	0.234	0.64058	0.073
c2_cp_v5	REACTOME_MHC_CLASS_II_ANTIGEN_PRESENTATION	73	http://www.broadinstitute.org/gsea/msigdb/cards/REACTOME_MHC_CLASS_II_ANTIGEN_PRESENTATION	0.20792	1.0258	0.4245	0.67385	1	0.301	0.256	0.225	0.64159	0.076
c2_cp_v5	KEGG_PATHWAYS_IN_CANCER	268	http://www.broadinstitute.org/gsea/msigdb/cards/KEGG_PATHWAYS_IN_CANCER	0.23197	1.0227	0.3806	0.67388	1	0.28	0.226	0.221	0.64183	0.068
c2_cp_v5	PID_RAC1_PATHWAY	51	http://www.broadinstitute.org/gsea/msigdb/cards/PID_RAC1_PATHWAY	0.27563	1.021	0.4161	0.67454	1	0.294	0.184	0.241	0.64277	0.067
c2_cp_v5	PID_ARF6_TRAFFICKING_PATHWAY	42	http://www.broadinstitute.org/gsea/msigdb/cards/PID_ARF6_TRAFFICKING_PATHWAY	0.26406	1.0163	0.4298	0.67531	1	0.214	0.16	0.181	0.64464	0.064
c2_cp_v5	ST_DIFFERENTIATION_PATHWAY_IN_PC12_CELLS	39	http://www.broadinstitute.org/gsea/msigdb/cards/ST_DIFFERENTIATION_PATHWAY_IN_PC12_CELLS	0.43525	1.5353	0.02845	0.67564	0.951	0.41	0.164	0.344	0.37074	0.192
c2_cp_v5	REACTOME_G_ALPHA_Q_SIGNALLING_EVENTS	96	http://www.broadinstitute.org/gsea/msigdb/cards/REACTOME_G_ALPHA_Q_SIGNALLING_EVENTS	0.25827	1.0146	0.4193	0.67597	1	0.271	0.18	0.224	0.64767	0.065
c2_cp_v5	BIOCARTA_PAR1_PATHWAY	32	http://www.broadinstitute.org/gsea/msigdb/cards/BIOCARTA_PAR1_PATHWAY	0.30885	1.0172	0.4382	0.67634	1	0.344	0.19	0.279	0.64699	0.066
c2_cp_v5	REACTOME_GASTRIN_CREB_SIGNALLING_PATHWAY_VIA_PKC_AND_MAPK	116	http://www.broadinstitute.org/gsea/msigdb/cards/REACTOME_GASTRIN_CREB_SIGNALLING_PATHWAY_VIA_PKC_AND_MAPK	0.23347	1.0182	0.4447	0.67717	1	0.19	0.111	0.17	0.64755	0.069
c2_cp_v5	KEGG_WNT_SIGNALING_PATHWAY	120	http://www.broadinstitute.org/gsea/msigdb/cards/KEGG_WNT_SIGNALING_PATHWAY	0.25092	1.012	0.4163	0.67836	1	0.292	0.21	0.233	0.65095	0.062
c2_cp_v5	PID_HIF1_TFPATHWAY	54	http://www.broadinstitute.org/gsea/msigdb/cards/PID_HIF1_TFPATHWAY	0.28114	0.98552	0.4721	0.68323	1	0.259	0.17	0.216	0.65842	0.039
c2_cp_v5	REACTOME_CIRCADIAN_CLOCK	45	http://www.broadinstitute.org/gsea/msigdb/cards/REACTOME_CIRCADIAN_CLOCK	0.27828	0.98404	0.4617	0.68346	1	0.311	0.195	0.251	0.65946	0.035
c2_cp_v5	KEGG_CALCIUM_SIGNALING_PATHWAY	101	http://www.broadinstitute.org/gsea/msigdb/cards/KEGG_CALCIUM_SIGNALING_PATHWAY	0.24844	0.98663	0.4579	0.68385	1	0.267	0.2	0.215	0.65968	0.041
c2_cp_v5	BIOCARTA_FMLP_PATHWAY	31	http://www.broadinstitute.org/gsea/msigdb/cards/BIOCARTA_FMLP_PATHWAY	0.2728	1.0071	0.4409	0.68552	1	0.194	0.149	0.165	0.65837	0.067
c2_cp_v5	KEGG_ADHERENS_JUNCTION	68	http://www.broadinstitute.org/gsea/msigdb/cards/KEGG_ADHERENS_JUNCTION	0.25803	0.98664	0.4716	0.68658	1	0.338	0.249	0.255	0.66236	0.044
c2_cp_v5	KEGG_LYSINE_DEGRADATION	42	http://www.broadinstitute.org/gsea/msigdb/cards/KEGG_LYSINE_DEGRADATION	0.26498	0.99199	0.4656	0.68706	1	0.381	0.263	0.282	0.66115	0.053
c2_cp_v5	PID_CD40_PATHWAY	28	http://www.broadinstitute.org/gsea/msigdb/cards/PID_CD40_PATHWAY	0.31738	0.98754	0.4494	0.68741	1	0.536	0.327	0.361	0.66178	0.046
c2_cp_v5	PID_BETA_CATENIN_NUC_PATHWAY	63	http://www.broadinstitute.org/gsea/msigdb/cards/PID_BETA_CATENIN_NUC_PATHWAY	0.25334	0.99306	0.4689	0.68789	1	0.317	0.228	0.246	0.66319	0.053
c2_cp_v5	PID_RAC1_REG_PATHWAY	34	http://www.broadinstitute.org/gsea/msigdb/cards/PID_RAC1_REG_PATHWAY	0.5198	1.5847	0.02546	0.68823	0.907	0.324	0.111	0.288	0.34959	0.185
c2_cp_v5	REACTOME_DEVELOPMENTAL_BIOLOGY	286	http://www.broadinstitute.org/gsea/msigdb/cards/REACTOME_DEVELOPMENTAL_BIOLOGY	0.22593	0.98999	0.4524	0.6883	1	0.297	0.215	0.238	0.66492	0.053
c2_cp_v5	REACTOME_SIGNALING_BY_FGFR_IN_DISEASE	102	http://www.broadinstitute.org/gsea/msigdb/cards/REACTOME_SIGNALING_BY_FGFR_IN_DISEASE	0.23262	0.99559	0.4753	0.68845	1	0.255	0.208	0.203	0.66435	0.055
c2_cp_v5	REACTOME_TOLL_RECEPTOR_CASCADES	107	http://www.broadinstitute.org/gsea/msigdb/cards/REACTOME_TOLL_RECEPTOR_CASCADES	0.22386	0.98822	0.4788	0.68872	1	0.271	0.209	0.216	0.66409	0.049
c2_cp_v5	KEGG_MELANOMA	53	http://www.broadinstitute.org/gsea/msigdb/cards/KEGG_MELANOMA	0.29589	0.99322	0.4437	0.69047	1	0.358	0.233	0.276	0.66556	0.058
c2_cp_v5	KEGG_TIGHT_JUNCTION	100	http://www.broadinstitute.org/gsea/msigdb/cards/KEGG_TIGHT_JUNCTION	0.25993	0.99584	0.4537	0.69081	1	0.33	0.213	0.262	0.66646	0.059
c2_cp_v5	KEGG_P53_SIGNALING_PATHWAY	64	http://www.broadinstitute.org/gsea/msigdb/cards/KEGG_P53_SIGNALING_PATHWAY	0.28375	0.9977	0.4705	0.69277	1	0.266	0.193	0.215	0.6685	0.062
c2_cp_v5	ST_T_CELL_SIGNAL_TRANSDUCTION	43	http://www.broadinstitute.org/gsea/msigdb/cards/ST_T_CELL_SIGNAL_TRANSDUCTION	0.50782	1.7805	0.002049	0.6929	0.45	0.488	0.242	0.371	0	0.168
c2_cp_v5	PID_S1P_S1P3_PATHWAY	27	http://www.broadinstitute.org/gsea/msigdb/cards/PID_S1P_S1P3_PATHWAY	0.2649	0.99597	0.4733	0.69343	1	0.37	0.296	0.261	0.66768	0.062
c2_cp_v5	PID_P38_ALPHA_BETA_DOWNSTREAM_PATHWAY	37	http://www.broadinstitute.org/gsea/msigdb/cards/PID_P38_ALPHA_BETA_DOWNSTREAM_PATHWAY	0.28017	0.97735	0.4858	0.69344	1	0.351	0.197	0.283	0.67105	0.042
c2_cp_v5	PID_EPO_PATHWAY	32	http://www.broadinstitute.org/gsea/msigdb/cards/PID_EPO_PATHWAY	0.30145	0.99832	0.4345	0.69448	1	0.5	0.283	0.359	0.66986	0.066
c2_cp_v5	BIOCARTA_P38MAPK_PATHWAY	37	http://www.broadinstitute.org/gsea/msigdb/cards/BIOCARTA_P38MAPK_PATHWAY	0.40975	1.5511	0.02449	0.69458	0.937	0.459	0.26	0.341	0.36801	0.193
c2_cp_v5	REACTOME_NEUROTRANSMITTER_RECEPTOR_BINDING_AND_DOWNSTREAM_TRANSMISSION_IN_THE_POSTSYNAPTIC_CELL	80	http://www.broadinstitute.org/gsea/msigdb/cards/REACTOME_NEUROTRANSMITTER_RECEPTOR_BINDING_AND_DOWNSTREAM_TRANSMISSION_IN_THE_POSTSYNAPTIC_CELL	0.22875	0.99894	0.467	0.69623	1	0.3	0.2	0.241	0.67127	0.07
c2_cp_v5	BIOCARTA_AT1R_PATHWAY	31	http://www.broadinstitute.org/gsea/msigdb/cards/BIOCARTA_AT1R_PATHWAY	0.28385	1.0002	0.454	0.6966	1	0.323	0.184	0.264	0.6715	0.071
c2_cp_v5	BIOCARTA_GH_PATHWAY	25	http://www.broadinstitute.org/gsea/msigdb/cards/BIOCARTA_GH_PATHWAY	0.31873	0.97349	0.4902	0.69796	1	0.4	0.215	0.314	0.67525	0.04
c2_cp_v5	PID_TAP63_PATHWAY	45	http://www.broadinstitute.org/gsea/msigdb/cards/PID_TAP63_PATHWAY	0.2661	0.9711	0.5012	0.69971	1	0.289	0.202	0.231	0.67919	0.039
c2_cp_v5	ST_INTEGRIN_SIGNALING_PATHWAY	76	http://www.broadinstitute.org/gsea/msigdb/cards/ST_INTEGRIN_SIGNALING_PATHWAY	0.43557	1.6397	0.004357	0.70093	0.821	0.368	0.197	0.297	0.30926	0.188
c2_cp_v5	REACTOME_SEMAPHORIN_INTERACTIONS	56	http://www.broadinstitute.org/gsea/msigdb/cards/REACTOME_SEMAPHORIN_INTERACTIONS	0.24593	0.95956	0.5609	0.70499	1	0.339	0.221	0.266	0.68623	0.037
c2_cp_v5	REACTOME_MEIOSIS	49	http://www.broadinstitute.org/gsea/msigdb/cards/REACTOME_MEIOSIS	-0.27445	-1.0119	0.4388	0.70682	1	0.245	0.18	0.202	0.69184	0.063
c2_cp_v5	BIOCARTA_FCER1_PATHWAY	38	http://www.broadinstitute.org/gsea/msigdb/cards/BIOCARTA_FCER1_PATHWAY	0.24584	0.95973	0.503	0.7074	1	0.263	0.161	0.221	0.68869	0.039
c2_cp_v5	REACTOME_METABOLISM_OF_NUCLEOTIDES	58	http://www.broadinstitute.org/gsea/msigdb/cards/REACTOME_METABOLISM_OF_NUCLEOTIDES	-0.26881	-1.0074	0.4392	0.70766	1	0.534	0.375	0.335	0.69253	0.062
c2_cp_v5	REACTOME_O_LINKED_GLYCOSYLATION_OF_MUCINS	29	http://www.broadinstitute.org/gsea/msigdb/cards/REACTOME_O_LINKED_GLYCOSYLATION_OF_MUCINS	-0.32353	-1.0013	0.4879	0.70794	1	0.31	0.196	0.25	0.69337	0.059
c2_cp_v5	REACTOME_DOWNSTREAM_SIGNAL_TRANSDUCTION	87	http://www.broadinstitute.org/gsea/msigdb/cards/REACTOME_DOWNSTREAM_SIGNAL_TRANSDUCTION	0.22795	0.96211	0.475	0.70852	1	0.345	0.296	0.244	0.68827	0.041
c2_cp_v5	PID_HNF3A_PATHWAY	29	http://www.broadinstitute.org/gsea/msigdb/cards/PID_HNF3A_PATHWAY	0.27961	0.95981	0.539	0.71	1	0.379	0.199	0.304	0.69088	0.04
c2_cp_v5	REACTOME_FATTY_ACID_TRIACYLGLYCEROL_AND_KETONE_BODY_METABOLISM	149	http://www.broadinstitute.org/gsea/msigdb/cards/REACTOME_FATTY_ACID_TRIACYLGLYCEROL_AND_KETONE_BODY_METABOLISM	0.19266	0.96259	0.5624	0.71039	1	0.248	0.181	0.206	0.69084	0.043
c2_cp_v5	REACTOME_G2_M_CHECKPOINTS	41	http://www.broadinstitute.org/gsea/msigdb/cards/REACTOME_G2_M_CHECKPOINTS	-0.35324	-1.0021	0.4772	0.71052	1	0.439	0.293	0.311	0.6972	0.062
c2_cp_v5	KEGG_GLYCOLYSIS_GLUCONEOGENESIS	45	http://www.broadinstitute.org/gsea/msigdb/cards/KEGG_GLYCOLYSIS_GLUCONEOGENESIS	-0.29007	-0.99795	0.4456	0.71055	1	0.378	0.301	0.265	0.69795	0.059
c2_cp_v5	KEGG_GLYCEROLIPID_METABOLISM	37	http://www.broadinstitute.org/gsea/msigdb/cards/KEGG_GLYCEROLIPID_METABOLISM	-0.29347	-1.004	0.4497	0.71064	1	0.297	0.172	0.247	0.69591	0.063
c2_cp_v5	KEGG_CELL_ADHESION_MOLECULES_CAMS	82	http://www.broadinstitute.org/gsea/msigdb/cards/KEGG_CELL_ADHESION_MOLECULES_CAMS	0.27027	0.95496	0.5412	0.71069	1	0.244	0.165	0.205	0.6933	0.039
c2_cp_v5	REACTOME_ELONGATION_ARREST_AND_RECOVERY	26	http://www.broadinstitute.org/gsea/msigdb/cards/REACTOME_ELONGATION_ARREST_AND_RECOVERY	-0.3536	-1.0077	0.4844	0.71149	1	0.462	0.292	0.328	0.69675	0.066
c2_cp_v5	PID_IL3_PATHWAY	25	http://www.broadinstitute.org/gsea/msigdb/cards/PID_IL3_PATHWAY	0.29087	0.96337	0.5257	0.71173	1	0.32	0.16	0.269	0.69205	0.046
c2_cp_v5	KEGG_VEGF_SIGNALING_PATHWAY	64	http://www.broadinstitute.org/gsea/msigdb/cards/KEGG_VEGF_SIGNALING_PATHWAY	0.24876	0.95075	0.4958	0.71543	1	0.188	0.114	0.167	0.70207	0.038
c2_cp_v5	PID_AR_TF_PATHWAY	43	http://www.broadinstitute.org/gsea/msigdb/cards/PID_AR_TF_PATHWAY	0.4778	1.5535	0.068	0.71796	0.936	0.558	0.281	0.403	0.37592	0.203
c2_cp_v5	REACTOME_COSTIMULATION_BY_THE_CD28_FAMILY	53	http://www.broadinstitute.org/gsea/msigdb/cards/REACTOME_COSTIMULATION_BY_THE_CD28_FAMILY	0.24311	0.94813	0.5426	0.71797	1	0.302	0.249	0.228	0.70291	0.039
c2_cp_v5	KEGG_TYPE_II_DIABETES_MELLITUS	33	http://www.broadinstitute.org/gsea/msigdb/cards/KEGG_TYPE_II_DIABETES_MELLITUS	0.30096	0.94625	0.5282	0.71883	1	0.364	0.215	0.286	0.70399	0.039
c2_cp_v5	REACTOME_HOST_INTERACTIONS_OF_HIV_FACTORS	116	http://www.broadinstitute.org/gsea/msigdb/cards/REACTOME_HOST_INTERACTIONS_OF_HIV_FACTORS	-0.49172	-1.7651	0.03184	0.72074	0.466	0.405	0.212	0.322	0	0.168
c2_cp_v5	REACTOME_SLC_MEDIATED_TRANSMEMBRANE_TRANSPORT	146	http://www.broadinstitute.org/gsea/msigdb/cards/REACTOME_SLC_MEDIATED_TRANSMEMBRANE_TRANSPORT	0.23695	0.94394	0.5104	0.72076	1	0.24	0.178	0.199	0.70685	0.039
c2_cp_v5	ST_G_ALPHA_I_PATHWAY	27	http://www.broadinstitute.org/gsea/msigdb/cards/ST_G_ALPHA_I_PATHWAY	0.5224	1.596	0.01075	0.72182	0.889	0.556	0.234	0.427	0.34372	0.194
[truncated: 432 more rows]

## Sheet: BL_Subtype
Geographic designation (BL subtype): endemic BL vs sporadic BL
Gene Set Enrichment Analysis (GSEA) Results (FDR q < 0.25):
[truncated: 910 more rows]

## Sheet: EBV_Presence
EBV presence in the Tumor: Positive vs Negative
[truncated: 911 more rows]

[truncated: 3 more sheets: GO_Terms, KEGG, GO_KEGG]
